# Supplementary material
Source: bioRxiv or medRxiv preprint supplement (https://www.biorxiv.org/highwire/filestream/115700/field_highwire_adjunct_files/0/380931-1.pdf)
Supplement: Supplementary file [file 380931-1.pdf]

# Supplemental Figure S1

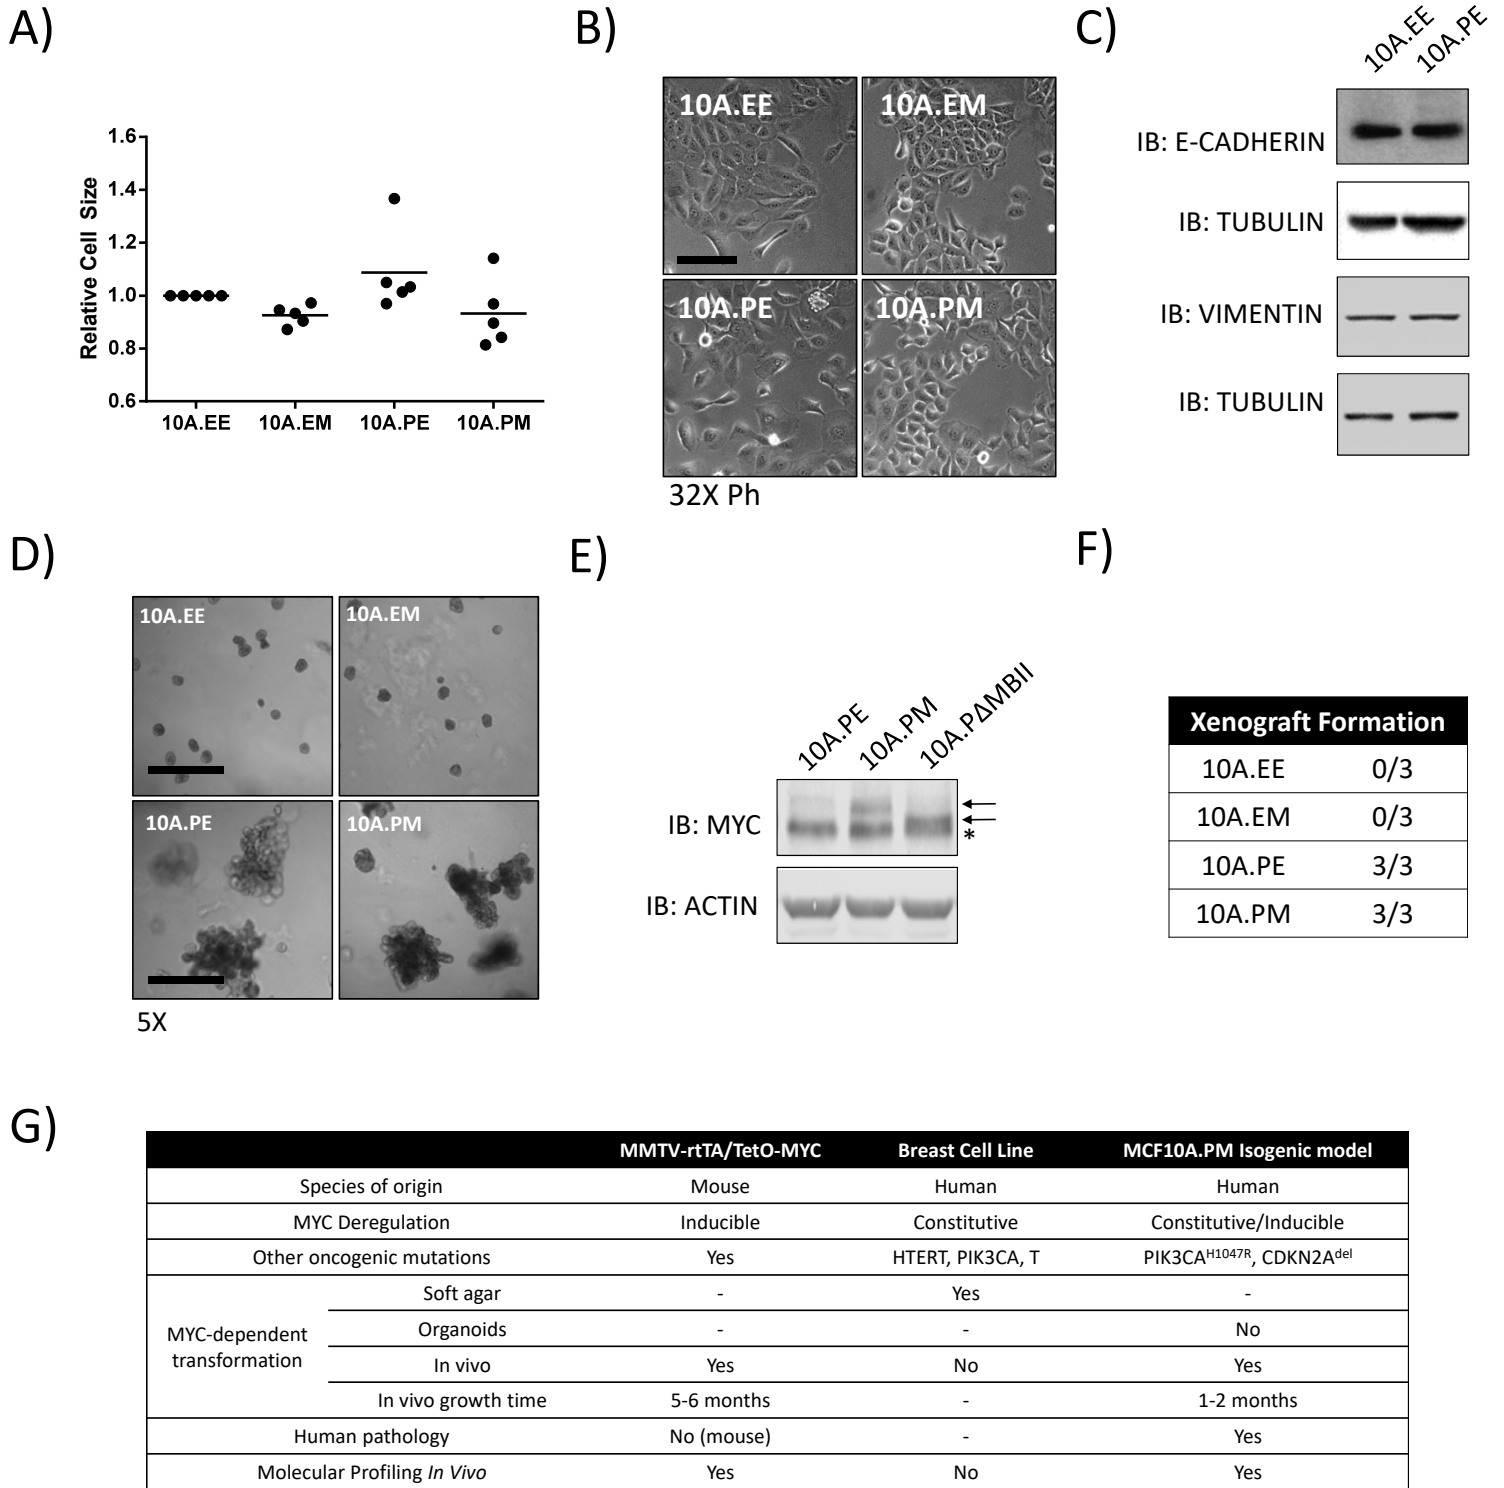

## Supplementary Figure 1

**(A)** Flow cytometry measurements for the isogenic MCF10A panel. Mean values are shown for relative cell-size, one-way ANOVA with Bonferroni post-test for multiple testing, 5 biological replicates. **(B)** The MCF10A isogenic panel was cultured in standard MCF10A media for 48 hours before imaging to monitor cell morphology. **(C)** 10A.EE and 10A.PE were cultured for 48 hours and protein lysates were harvested to monitor markers of EMT. **(D)** Images were acquired on day 12 and quantified based on assessment of acinar circularity and size. Scale bar = 500  $\mu$ m **(E)** Ectopic MYC expression from cells injected into NOD-SCID mice. Arrows point to ectopic WT and  $\Delta$ MBII protein. \* indicates endogenous MYC. **(F)** The MCF10A isogenic panel was injected into female NOD-SCID mice as previously described. Summary of tumor formation is presented, 3 animals per group. **(G)** Summary table of common GEMM and breast cell line models in comparison to the MCF10A.PM isogenic model. “-” represents not tested.

**Supplementary Table S1 – MYC driven 10A.PM xenograft differential expression analysis**

Differential expressed genes from three 10A.PM and 10A.PE xenograft tumors. All significantly changing genes are shown. Genes with a positive fold change are increased in 10A.PM relative to 10A.PE. Genes with a negative fold change are decreased in 10A.PM relative to 10A.PE.

|             | PPEE        | PPDE        | PostFC       | RealFC      |
|-------------|-------------|-------------|--------------|-------------|
| A2M         | 0.049958996 | 0.950041004 | 0.69663332   | 1.621308659 |
| A2ML1       | 0.049886667 | 0.950113333 | -2.321603899 | 0.162981826 |
| AACSP1      | 0.049833408 | 0.950166592 | 0.958161392  | 1.961341375 |
| AAMP        | 0.049828735 | 0.950171265 | 0.674155458  | 1.596570366 |
| AAR2        | 0.049667919 | 0.950332081 | 1.062130496  | 2.118324857 |
| AARS        | 0.049663268 | 0.950336732 | 0.601423295  | 1.51819292  |
| AATF        | 0.049655636 | 0.950344364 | -1.251778649 | 0.410072891 |
| ABCA10      | 0.049608296 | 0.950391704 | -1.361185199 | 0.373966298 |
| ABCA17P     | 0.049553625 | 0.950446375 | -0.843937717 | 0.556996776 |
| ABCA6       | 0.049508348 | 0.950491652 | 0.693595182  | 1.617642169 |
| ABCB10      | 0.049471579 | 0.950528421 | 2.250151458  | 5.646399338 |
| ABCB9       | 0.04942183  | 0.95057817  | 1.017434745  | 2.02664375  |
| ABCC2       | 0.049142354 | 0.950857646 | -1.642776819 | 0.309400385 |
| ABCC4       | 0.049081512 | 0.950918488 | -0.60809467  | 0.656025028 |
| ABCE1       | 0.049049769 | 0.950950231 | -0.655210077 | 0.634639594 |
| ABCF1       | 0.048988152 | 0.951011848 | -0.574018336 | 0.671701927 |
| ABCF2       | 0.048810079 | 0.951189921 | -1.848983025 | 0.236740357 |
| ABCG2       | 0.048753545 | 0.951246455 | -1.67806634  | 0.306963823 |
| ABHD14B     | 0.048718297 | 0.951281703 | 0.851606242  | 1.804524925 |
| ABHD6       | 0.048559194 | 0.951440806 | 1.208863866  | 2.354429548 |
| ABI2        | 0.048425899 | 0.951574101 | -2.21161589  | 0.196102269 |
| ABLIM3      | 0.048403601 | 0.951596399 | -1.046737599 | 0.480574699 |
| ABRACL      | 0.048400573 | 0.951599427 | 1.162318553  | 2.270708189 |
| ABT1        | 0.048370674 | 0.951629326 | -1.944269025 | 0.234854533 |
| AC002066.1  | 0.04816259  | 0.95183741  | 0.713472345  | 1.639955234 |
| AC002117.1  | 0.048074973 | 0.951925027 | 0.662556065  | 1.583231912 |
| AC002306.1  | 0.047915945 | 0.952084055 | 1.325661867  | 2.527536012 |
| AC002519.8  | 0.04790307  | 0.95209693  | 1.164913951  | 2.252601768 |
| AC005152.3  | 0.047900841 | 0.952099159 | -2.344378025 | 0.164563937 |
| AC005154.6  | 0.047757476 | 0.952242524 | -2.259183957 | 0.188574309 |
| AC005539.2  | 0.047717128 | 0.952282872 | -1.063414461 | 0.478253172 |
| AC005618.6  | 0.047664326 | 0.952335674 | -0.789673046 | 0.576543067 |
| AC005682.5  | 0.047594719 | 0.952405281 | -3.371152502 | 0.088760602 |
| AC005682.6  | 0.047506    | 0.952494    | 0.640718054  | 1.55997566  |
| AC005752.10 | 0.047455609 | 0.952544391 | -0.876388418 | 0.543065192 |
| AC005754.7  | 0.047451268 | 0.952548732 | -1.518578091 | 0.348763042 |
| AC005754.8  | 0.047407483 | 0.952592517 | -2.221298818 | 0.214148419 |
| AC005863.1  | 0.047363928 | 0.952636072 | 1.167802161  | 2.2685076   |
| AC006262.4  | 0.047332988 | 0.952667012 | -1.759856053 | 0.278762409 |
| AC006262.5  | 0.04715558  | 0.95284442  | -2.771451106 | 0.144356301 |
| AC006547.13 | 0.047062094 | 0.952937906 | -0.747717669 | 0.595040079 |
| AC006994.1  | 0.046990006 | 0.953009994 | 1.034439982  | 2.048854865 |
| AC007040.11 | 0.046841361 | 0.953158639 | 0.521530296  | 1.438059529 |
| AC007099.1  | 0.046830032 | 0.953169968 | -1.686026782 | 0.281106376 |
| AC007283.4  | 0.046713245 | 0.953286755 | 0.955239415  | 1.952017887 |
| AC007461.2  | 0.046673122 | 0.953326878 | -1.098660414 | 0.466146687 |
| AC007919.18 | 0.04661308  | 0.95338692  | -0.542472602 | 0.685883365 |
| AC008074.3  | 0.04656914  | 0.95343086  | 1.217521963  | 2.381560487 |
| AC008079.10 | 0.046523611 | 0.953476389 | 0.677416576  | 1.599551383 |
| AC008277.1  | 0.046518809 | 0.953481191 | -1.603895039 | 0.320716887 |
| AC008937.2  | 0.046472505 | 0.953527495 | -1.300441817 | 0.40094596  |
| AC009237.8  | 0.045772186 | 0.954227814 | -1.024352775 | 0.491545047 |
| AC009299.3  | 0.045750187 | 0.954249813 | -1.935015558 | 0.222893233 |
| AC009480.3  | 0.04570145  | 0.95429855  | -2.276243788 | 0.188965665 |
| AC009487.6  | 0.045674859 | 0.954325141 | 0.685959239  | 1.609567536 |
| AC009505.2  | 0.045587731 | 0.954412269 | -0.871577483 | 0.545191933 |
| AC009961.3  | 0.045373752 | 0.954626248 | -0.986746826 | 0.499481428 |
| AC010148.1  | 0.045348738 | 0.954651262 | -1.178019183 | 0.441845242 |
| AC010468.1  | 0.045271034 | 0.954728966 | 1.003727679  | 2.008119307 |
| AC010524.4  | 0.045104901 | 0.954895099 | -2.31070975  | 0.141971007 |
| AC010761.8  | 0.045011629 | 0.954988371 | 1.138992156  | 2.203137283 |
| AC012074.2  | 0.044964877 | 0.955035123 | -0.898106483 | 0.535543648 |
| AC012360.6  | 0.044937559 | 0.955062441 | -0.541742288 | 0.686607749 |
| AC012363.13 | 0.04489902  | 0.95510098  | 0.555301675  | 1.47204909  |
| AC012368.1  | 0.044844411 | 0.955155589 | 0.871994132  | 1.832228209 |
| AC012370.2  | 0.044814865 | 0.955185135 | 1.233375074  | 2.379726236 |
| AC012531.25 | 0.044776404 | 0.955223596 | -1.688184172 | 0.288562092 |
| AC015849.19 | 0.044714479 | 0.955285521 | 1.393967032  | 2.758011975 |
| AC016735.2  | 0.04457668  | 0.95542332  | -1.020862486 | 0.485931781 |
| AC016738.4  | 0.044502219 | 0.955497781 | -1.484297182 | 0.345553577 |
| AC016995.3  | 0.044389286 | 0.955610714 | 0.865699179  | 1.825663932 |
| AC017060.1  | 0.044319355 | 0.955680645 | -2.054689293 | 0.227125753 |
| AC018462.2  | 0.04425936  | 0.95574064  | -0.914117205 | 0.530635828 |
| AC018890.6  | 0.044223335 | 0.955776665 | -1.471094296 | 0.360529028 |
| AC019117.1  | 0.044216492 | 0.955783508 | 0.515187457  | 1.429991424 |
| AC019117.2  | 0.04418147  | 0.95581853  | -0.822020489 | 0.565093356 |
| AC019186.1  | 0.044079747 | 0.955920253 | 0.713110919  | 1.639930641 |
| AC021188.4  | 0.044032971 | 0.955967029 | 0.814580735  | 1.759060097 |
| AC024257.1  | 0.043995531 | 0.956004469 | -0.969616435 | 0.510246918 |
| AC024560.3  | 0.043983796 | 0.956016204 | -1.796816993 | 0.268925235 |
| AC025171.1  | 0.04382994  | 0.95617006  | -0.879743237 | 0.543114389 |
| AC026188.1  | 0.043798869 | 0.956201131 | 1.181615213  | 2.317621516 |
| AC034220.3  | 0.043717692 | 0.956282308 | -2.34713975  | 0.193260866 |
| AC063976.7  | 0.043685596 | 0.956314404 | -0.615360479 | 0.652313829 |
| AC069547.2  | 0.043680733 | 0.956319267 | -2.558528929 | 0.151001438 |
| AC072062.1  | 0.0436513   | 0.9563487   | -1.287925423 | 0.40351799  |

|            |             |             |              |             |
|------------|-------------|-------------|--------------|-------------|
| AC073130.1 | 0.04361663  | 0.95638337  | -0.793868873 | 0.574823189 |
| AC073283.7 | 0.043613563 | 0.956386437 | 0.523606817  | 1.437657191 |
| AC073635.5 | 0.043431155 | 0.956568845 | 0.714216928  | 1.640789146 |
| AC074011.2 | 0.043417018 | 0.956582982 | -1.183079738 | 0.431570113 |
| AC079210.1 | 0.043333388 | 0.956666612 | -2.038085239 | 0.234558707 |
| AC079586.1 | 0.043302097 | 0.956697903 | 0.857200832  | 1.811793834 |
| AC083862.6 | 0.043165516 | 0.956834484 | 0.802916022  | 1.745263648 |
| AC083899.3 | 0.043147999 | 0.95685201  | -1.820302367 | 0.266769343 |
| AC092168.2 | 0.043125311 | 0.956874689 | -1.376847721 | 0.379054754 |
| AC092669.3 | 0.043105207 | 0.956894793 | 0.921157415  | 1.896113721 |
| AC092669.6 | 0.043037169 | 0.956962831 | -0.560406425 | 0.677935186 |
| AC092839.4 | 0.043013674 | 0.956986326 | -0.820532539 | 0.566078375 |
| AC093110.3 | 0.042805093 | 0.957194907 | 0.601100347  | 1.517087357 |
| AC093323.3 | 0.042758941 | 0.957241059 | 0.580383069  | 1.495485004 |
| AC093732.1 | 0.04273733  | 0.95726267  | -0.872247316 | 0.544671169 |
| AC093822.1 | 0.042723577 | 0.957276423 | 0.630257274  | 1.549203439 |
| AC096772.6 | 0.04255609  | 0.95744391  | -0.957816331 | 0.514785641 |
| AC104058.1 | 0.042472187 | 0.957527813 | 1.432680407  | 2.812568279 |
| AC104654.2 | 0.042421917 | 0.957578083 | -0.735298033 | 0.600647865 |
| AC105760.3 | 0.042354495 | 0.957645505 | 1.885062286  | 3.983536292 |
| AC107081.5 | 0.042327311 | 0.957672689 | 2.973642691  | 8.749651899 |
| AC107218.3 | 0.042181743 | 0.957818257 | 1.082673479  | 2.148110152 |
| AC112229.1 | 0.042116086 | 0.957883914 | -1.387626211 | 0.374641755 |
| AC116366.6 | 0.042052176 | 0.957947824 | -1.939636914 | 0.241538267 |
| AC133106.2 | 0.04191098  | 0.95808902  | 0.665280859  | 1.590701978 |
| AC135178.1 | 0.041903584 | 0.958096416 | 0.565351513  | 1.482077689 |
| AC139100.3 | 0.041885672 | 0.958114328 | 1.591011939  | 3.121681009 |
| AC226118.1 | 0.041860182 | 0.958139818 | 0.6588154    | 1.581551149 |
| ACACB      | 0.041790398 | 0.958209602 | -1.014464997 | 0.494188808 |
| ACADSB     | 0.041617139 | 0.958382861 | 0.961798321  | 1.950732056 |
| ACAT1      | 0.041609649 | 0.958390351 | -0.599877396 | 0.659171331 |
| ACE2       | 0.041558551 | 0.958441449 | 1.144776921  | 2.255747566 |
| ACKR2      | 0.041541512 | 0.958458488 | -2.166929772 | 0.177265967 |
| ACLY       | 0.041513247 | 0.958486753 | 0.967912447  | 1.95675092  |
| ACOT11     | 0.041384594 | 0.958615406 | -1.531090663 | 0.342118056 |
| ACOX1      | 0.04132054  | 0.95867946  | 0.712615607  | 1.639440003 |
| ACP1       | 0.041235097 | 0.958764903 | -0.861670835 | 0.549274672 |
| ACSBG1     | 0.041224426 | 0.958775574 | 1.346183063  | 2.61156799  |
| ACSM1      | 0.041199876 | 0.958800124 | -2.567648042 | 0.159007787 |
| ACSM6      | 0.041157773 | 0.958842227 | -1.712100653 | 0.305030867 |
| ACSS3      | 0.041105676 | 0.958894324 | -1.629895407 | 0.322432794 |
| ACTA1      | 0.041090975 | 0.958909025 | -2.098678662 | 0.204081104 |
| ACTA2-AS1  | 0.041047635 | 0.958952365 | -0.750790732 | 0.593563959 |
| ACTL10     | 0.041022068 | 0.958977932 | -1.577124043 | 0.325555136 |
| ACTN1      | 0.040986074 | 0.959013926 | 1.528220767  | 2.908476002 |
| ACTR3B     | 0.040867319 | 0.959132681 | -2.733239309 | 0.122239958 |
| ACVR1      | 0.040858942 | 0.959141058 | 1.032792409  | 2.04820123  |
| ACVRC      | 0.0408268   | 0.9591732   | -0.891538849 | 0.536253947 |
| ACVR2A     | 0.040780007 | 0.959219993 | 0.748303116  | 1.679968813 |
| ACY1       | 0.040676122 | 0.959323878 | -1.42241771  | 0.371973607 |
| ACY2       | 0.040582584 | 0.959417416 | -2.808347773 | 0.134799577 |
| ADA        | 0.040522747 | 0.959477253 | -1.068035394 | 0.46972331  |
| ADAM12     | 0.040472904 | 0.959527096 | 0.730220154  | 1.659025095 |
| ADAM15     | 0.04045177  | 0.95954823  | -2.365068702 | 0.161148868 |
| ADAM19     | 0.040412236 | 0.959587764 | -2.804199334 | 0.103292996 |
| ADAM1B     | 0.040213597 | 0.959786403 | -0.827082884 | 0.562834172 |
| ADAM20     | 0.040087265 | 0.959912735 | 1.253653177  | 2.432225266 |
| ADAM20P1   | 0.040026387 | 0.959973613 | -2.055451815 | 0.209264586 |
| ADAM22     | 0.039886387 | 0.960113613 | -3.100398505 | 0.098827844 |
| ADAM28     | 0.039877284 | 0.960122716 | -1.52812941  | 0.334153241 |
| ADAMTS14   | 0.039762438 | 0.960237562 | 0.910290707  | 1.880542617 |
| ADAMTS16   | 0.039725044 | 0.960274956 | 1.124960917  | 2.211315291 |
| ADAMTS17   | 0.039650481 | 0.960349519 | -1.692920458 | 0.295598347 |
| ADAMTS19   | 0.039648038 | 0.960351962 | -1.701702847 | 0.288729144 |
| ADAMTS2    | 0.039520616 | 0.960479384 | -2.600026619 | 0.146752058 |
| ADAMTS5    | 0.039515275 | 0.960484725 | -1.11415041  | 0.453799132 |
| ADAMTS6    | 0.039494874 | 0.960505126 | 0.957341761  | 1.942162513 |
| ADAMTSL1   | 0.039412362 | 0.960587638 | 1.055400526  | 2.086725327 |
| ADAMTSL5   | 0.039403236 | 0.960596764 | -0.632916446 | 0.644554014 |
| ADAT2      | 0.039345371 | 0.960654629 | 0.923400878  | 1.897405417 |
| ADCK3      | 0.039300213 | 0.960699787 | -2.428158104 | 0.153867457 |
| ADCY1      | 0.039293629 | 0.960706371 | -1.581324388 | 0.313427546 |
| ADCY10P1   | 0.039258457 | 0.960741543 | 0.852633934  | 1.808656661 |
| ADCY3      | 0.039244964 | 0.960755036 | 0.694845071  | 1.620124862 |
| ADD1       | 0.039230418 | 0.960769582 | -2.282204887 | 0.184932045 |
| ADD3       | 0.039012456 | 0.960987544 | 0.694188776  | 1.619108543 |
| ADGRE2     | 0.038893297 | 0.961106703 | -0.995469186 | 0.492773548 |
| ADGRF1     | 0.038818575 | 0.961181425 | 1.219455801  | 2.340951962 |
| ADGRF2     | 0.038762397 | 0.961237603 | -1.57948758  | 0.33144685  |
| ADGRF5P1   | 0.038721483 | 0.961278517 | 0.778660983  | 1.716736984 |
| ADGRG2     | 0.038665896 | 0.961334104 | 1.273593257  | 2.430799572 |
| ADH1A      | 0.038659583 | 0.961340417 | -1.422042373 | 0.36632354  |
| ADH1B      | 0.038643048 | 0.961356952 | 1.204586329  | 2.313621613 |
| ADH4       | 0.038624546 | 0.961375454 | -0.528550741 | 0.693134363 |
| ADH6       | 0.038611762 | 0.961388238 | 0.67822869   | 1.600714362 |
| ADHFE1     | 0.038558564 | 0.961441436 | 0.786007255  | 1.728114873 |
| ADI1       | 0.038520757 | 0.961479243 | 0.58071886   | 1.496023873 |
| ADIRF-AS1  | 0.03847324  | 0.96152676  | -1.605209445 | 0.317333142 |
| ADK        | 0.038429528 | 0.961570472 | 0.918201863  | 1.890558615 |
| ADM        | 0.038425574 | 0.961574426 | 1.13510636   | 2.211385698 |
| ADPGK      | 0.038377967 | 0.961622033 | -2.294460658 | 0.181951224 |
| ADPRHL2    | 0.038263548 | 0.961736452 | -1.427729975 | 0.362405714 |
| ADPRM      | 0.038187015 | 0.961812985 | -0.784524237 | 0.580086377 |

|            |             |             |              |             |
|------------|-------------|-------------|--------------|-------------|
| ADSL       | 0.038163506 | 0.961836494 | -1.743640116 | 0.282752034 |
| ADTRP      | 0.038001532 | 0.961998468 | -2.544754468 | 0.164417316 |
| AEN        | 0.03794265  | 0.96205735  | -1.070927575 | 0.471948569 |
| AF064860.5 | 0.037902796 | 0.962097204 | -2.560575358 | 0.153435705 |
| AF064860.7 | 0.037737035 | 0.962262965 | -1.203807437 | 0.433099471 |
| AF127936.9 | 0.037723295 | 0.962276705 | -1.424000631 | 0.356099077 |
| AF146191.4 | 0.037614738 | 0.962385262 | -1.763424415 | 0.273497328 |
| AF178030.2 | 0.037583572 | 0.962416428 | -1.103415152 | 0.462649212 |
| AF212831.2 | 0.037544358 | 0.962455642 | -1.962292339 | 0.225972763 |
| AFAP1-AS1  | 0.037399258 | 0.962600742 | -0.682381488 | 0.621845172 |
| AFAP1L2    | 0.037338395 | 0.962661605 | 1.560156058  | 2.95935941  |
| AFF2       | 0.037287888 | 0.962712112 | -1.063606235 | 0.471538682 |
| AFG3L1P    | 0.037171955 | 0.962828045 | 0.548985888  | 1.463218395 |
| AFG3L2     | 0.037155685 | 0.962844315 | -2.406468453 | 0.173497431 |
| AGO4       | 0.037138134 | 0.962861866 | 0.71701559   | 1.644368221 |
| AGPAT4     | 0.037067177 | 0.962932823 | 0.75584111   | 1.68939671  |
| AGPAT5     | 0.037028397 | 0.962971603 | -0.84178576  | 0.55775912  |
| AGT        | 0.036999637 | 0.963000363 | 0.968926058  | 1.957863134 |
| AHCY       | 0.036976643 | 0.963023357 | -2.540662484 | 0.155335863 |
| AHCYL2     | 0.03681917  | 0.96318083  | -1.097875464 | 0.4650377   |
| AHRR       | 0.036788862 | 0.963211138 | -1.198714871 | 0.433554947 |
| AHSA1      | 0.036788713 | 0.963211287 | -3.689106818 | 0.075630683 |
| AIF1L      | 0.036756465 | 0.963243535 | 0.649369706  | 1.569011996 |
| AIFM1      | 0.036676561 | 0.963323439 | -2.256865559 | 0.162985482 |
| AIM1       | 0.036660942 | 0.963339058 | -0.57506948  | 0.66998663  |
| AIMP1      | 0.036573339 | 0.963426661 | 0.608221994  | 1.524697541 |
| AIMP2      | 0.036537895 | 0.963462105 | -1.117978648 | 0.460713418 |
| AJUBA      | 0.036508411 | 0.963491589 | -1.484065761 | 0.342227968 |
| AK1        | 0.036452652 | 0.963547348 | 1.870372106  | 3.660529555 |
| AK2        | 0.036337706 | 0.963662294 | -1.41831427  | 0.3623158   |
| AK4        | 0.036327018 | 0.963672982 | 1.623479018  | 3.188299808 |
| AK4P1      | 0.036248944 | 0.963751056 | -1.217250259 | 0.415621728 |
| AK4P4      | 0.036123094 | 0.963876906 | 0.740107267  | 1.678290445 |
| AKAP1      | 0.036028437 | 0.963971563 | 1.039825029  | 2.056047425 |
| AKAP13     | 0.036000557 | 0.963999443 | 1.431013233  | 2.699571791 |
| AKAP8      | 0.035971813 | 0.964028187 | -1.734428703 | 0.2815476   |
| AKR1A1     | 0.035880506 | 0.964119494 | -0.716776977 | 0.60789942  |
| AKR1B1     | 0.035817582 | 0.964182418 | 1.207386167  | 2.314494825 |
| AKR1C3     | 0.035803028 | 0.964196972 | -1.101764162 | 0.465669975 |
| AKR1E2     | 0.035783934 | 0.964216066 | 0.934717204  | 1.913439611 |
| AKR7A2     | 0.035781264 | 0.964218736 | 0.826730752  | 1.773768434 |
| AKR7A2P1   | 0.035766854 | 0.964233146 | -0.965370227 | 0.5099704   |
| AKR7A3     | 0.035764007 | 0.964235993 | -1.079135498 | 0.470139647 |
| AKR7L      | 0.035717352 | 0.964282648 | -0.657361043 | 0.633818019 |
| AKT1S1     | 0.035707275 | 0.964292725 | 1.612723663  | 3.073591158 |
| AKT3       | 0.035656154 | 0.964343846 | -0.76766774  | 0.584473611 |
| AL031320.1 | 0.035641605 | 0.964358395 | -0.721215363 | 0.606539016 |
| AL109767.1 | 0.035549212 | 0.964450788 | -1.310689978 | 0.402817369 |
| AL163953.3 | 0.03554867  | 0.96445133  | 2.117054177  | 4.686318789 |
| AL353626.1 | 0.035543337 | 0.964456663 | -1.128648276 | 0.45709689  |
| AL353626.2 | 0.035496973 | 0.964503027 | 0.728933178  | 1.659349262 |
| AL353698.1 | 0.035473154 | 0.964526846 | -1.005936344 | 0.495997121 |
| AL590452.1 | 0.035442708 | 0.964557292 | 0.868002495  | 1.828532718 |
| AL591893.1 | 0.035434768 | 0.964565232 | -1.088903929 | 0.464181089 |
| ALAD       | 0.035369297 | 0.964630703 | -2.47204919  | 0.17249814  |
| ALDH18A1   | 0.035271489 | 0.964728511 | 1.047733913  | 2.094854538 |
| ALDH1A1    | 0.035042906 | 0.964957094 | -1.794331398 | 0.287475828 |
| ALDH1B1    | 0.035004983 | 0.964995017 | -2.087469989 | 0.209287834 |
| ALDH1L2    | 0.034997708 | 0.965002292 | -0.734038121 | 0.601165137 |
| ALDOA      | 0.034963744 | 0.965036256 | -0.556002359 | 0.680066667 |
| ALG1       | 0.034823723 | 0.965176277 | 0.622172084  | 1.540994133 |
| ALG1L13P   | 0.034648374 | 0.965351626 | -0.880058351 | 0.542248135 |
| ALG3       | 0.034495934 | 0.965504066 | -0.769852758 | 0.582558723 |
| ALG5       | 0.034484294 | 0.965515706 | -2.892285082 | 0.129803089 |
| ALG8       | 0.034423487 | 0.965576513 | -2.543825783 | 0.12076943  |
| ALK        | 0.034195328 | 0.965804672 | -1.180333909 | 0.438957618 |
| ALKBH2     | 0.03418396  | 0.96581604  | 0.883418645  | 1.861301844 |
| ALKBH3     | 0.034173311 | 0.965826689 | 0.733703258  | 1.663230653 |
| ALOX15B    | 0.034105634 | 0.965894366 | -1.553460094 | 0.325185909 |
| ALPK1      | 0.034042943 | 0.965957057 | 0.720284543  | 1.650465399 |
| ALPK2      | 0.033683534 | 0.966316466 | -1.723814917 | 0.299841159 |
| ALYREF     | 0.033671637 | 0.966328363 | -1.053972441 | 0.480033288 |
| AMER1      | 0.033557998 | 0.966442002 | -0.588815946 | 0.664872859 |
| AMIG01     | 0.033415687 | 0.966584313 | -0.694085865 | 0.616334679 |
| AMOT       | 0.033396525 | 0.966603475 | 0.60418374   | 1.520990842 |
| AMOTL1     | 0.033333081 | 0.966666919 | 1.663171527  | 3.318187389 |
| AMPD2      | 0.033188638 | 0.966811362 | 0.846584953  | 1.798418763 |
| AMT        | 0.033103182 | 0.966896818 | 1.024820805  | 2.045443094 |
| AMY2B      | 0.033084983 | 0.966915017 | -0.892953426 | 0.536168436 |
| ANAPC1     | 0.033066487 | 0.966933513 | -0.556999    | 0.679415637 |
| ANAPC11    | 0.032983211 | 0.967016789 | 0.783980612  | 1.722058435 |
| ANAPC5     | 0.032963793 | 0.967036207 | -0.906160791 | 0.529853783 |
| ANAPC7     | 0.032912033 | 0.967087967 | -1.550030421 | 0.33921096  |
| ANGEL1     | 0.032859653 | 0.967140347 | -1.177121831 | 0.432691368 |
| ANGPTL2    | 0.032835406 | 0.967164594 | -1.082861557 | 0.464464386 |
| ANGPTL4    | 0.032782374 | 0.967217626 | -1.124639436 | 0.454021205 |
| ANGPTL7    | 0.032773704 | 0.967226296 | 0.566444272  | 1.481565451 |
| ANK2       | 0.032760095 | 0.967239905 | -1.467545634 | 0.359659688 |
| ANK3       | 0.032756469 | 0.967243531 | 1.048980153  | 2.076623814 |
| ANKAR      | 0.032674373 | 0.967325627 | -1.819485394 | 0.273350388 |
| ANKDD1B    | 0.032595211 | 0.967404789 | -2.212599293 | 0.207305485 |
| ANKH       | 0.032305389 | 0.967694611 | -3.405521852 | 0.062948244 |
| ANKMY1     | 0.032287856 | 0.967712144 | -1.10043931  | 0.456160876 |

|                 |             |             |              |             |
|-----------------|-------------|-------------|--------------|-------------|
| ANKRD13B        | 0.032263639 | 0.967736361 | -0.90189352  | 0.534932968 |
| ANKRD16         | 0.032118472 | 0.967881528 | -1.385590374 | 0.375284006 |
| ANKRD18B        | 0.032067072 | 0.967932928 | -2.528481023 | 0.126283849 |
| ANKRD19P        | 0.032036152 | 0.967963848 | 0.806178426  | 1.749143562 |
| ANKRD20A11P     | 0.032016844 | 0.967983156 | 1.428830588  | 2.705807598 |
| ANKRD22         | 0.03199331  | 0.96800669  | 1.079994049  | 2.115791063 |
| ANKRD27         | 0.031977463 | 0.968022537 | -0.889757641 | 0.537611047 |
| ANKRD30BP3      | 0.031894653 | 0.968105347 | 0.889508138  | 1.867912157 |
| ANKRD36C        | 0.031892675 | 0.968107325 | -2.171151346 | 0.206667807 |
| ANKRD37         | 0.031833004 | 0.968166996 | -0.800783536 | 0.573940639 |
| ANKRD44         | 0.031825086 | 0.968174914 | -1.032635695 | 0.483939615 |
| ANKRD44-IT1     | 0.031732942 | 0.968267058 | -1.132450978 | 0.45562876  |
| ANKRD62P1-PARP4 | 0.031692127 | 0.968307873 | -1.62882537  | 0.322749675 |
| ANKS1A          | 0.031613895 | 0.968386105 | -0.915027344 | 0.526196539 |
| ANKS1B          | 0.03158503  | 0.96841497  | -0.914357221 | 0.524374698 |
| ANKS3           | 0.031526715 | 0.968473285 | 1.306419586  | 2.482640487 |
| ANKZF1          | 0.031474509 | 0.968525491 | 0.806615408  | 1.758967714 |
| ANO1            | 0.031320658 | 0.968679342 | 0.812034963  | 1.756028464 |
| ANO10           | 0.031250922 | 0.968749078 | 0.87676087   | 1.837618509 |
| ANOS1           | 0.03122928  | 0.96877072  | -1.120756673 | 0.452309482 |
| ANP32A          | 0.031219565 | 0.968780435 | -2.716266252 | 0.151925387 |
| ANP32B          | 0.03120381  | 0.96879619  | 0.761266159  | 1.695526768 |
| ANP32E          | 0.031179441 | 0.968820559 | -1.662182512 | 0.315574921 |
| ANTXR1          | 0.031171275 | 0.968828725 | 1.277755558  | 2.473784067 |
| ANXA10          | 0.031028402 | 0.968971598 | -1.721499359 | 0.2775715   |
| ANXA2P1         | 0.030988651 | 0.969011349 | 0.809240778  | 1.757131843 |
| ANXA2R          | 0.030933598 | 0.969066402 | 0.72175958   | 1.649541506 |
| ANXA5           | 0.030669037 | 0.969330963 | -2.095784482 | 0.227615166 |
| AOX1            | 0.030504076 | 0.969495924 | -1.730813254 | 0.298995843 |
| AP000230.1      | 0.030502727 | 0.969497273 | 0.934044989  | 1.924402093 |
| AP000432.3      | 0.030471231 | 0.969528769 | -1.649692008 | 0.309719758 |
| AP000473.5      | 0.030414705 | 0.969585295 | -0.887360845 | 0.538137338 |
| AP000473.8      | 0.030409895 | 0.969590105 | 0.522745098  | 1.436738976 |
| AP000476.1      | 0.030390881 | 0.969609119 | 1.398190658  | 2.661691539 |
| AP000479.1      | 0.030382001 | 0.969617999 | -0.888651306 | 0.537771222 |
| AP000654.4      | 0.030362746 | 0.969637254 | 0.558298931  | 1.473903735 |
| AP000962.1      | 0.030316332 | 0.969683668 | -1.589680759 | 0.315398574 |
| AP000962.2      | 0.030266466 | 0.969733534 | -0.895795202 | 0.535306286 |
| AP000998.2      | 0.030221841 | 0.969778159 | -1.860891416 | 0.251807667 |
| AP001258.4      | 0.030134325 | 0.969865675 | -0.764081084 | 0.587099999 |
| AP001350.4      | 0.030036935 | 0.969963065 | 0.672931649  | 1.596186606 |
| AP001439.2      | 0.030022481 | 0.969977519 | 1.602957074  | 3.058013057 |
| AP001442.2      | 0.029964264 | 0.970035736 | -0.613866144 | 0.65320762  |
| AP002954.3      | 0.029846355 | 0.970153645 | -2.028725405 | 0.21948382  |
| AP003041.2      | 0.029813316 | 0.970186684 | -1.834384013 | 0.25831492  |
| AP003068.18     | 0.029764999 | 0.970235001 | 0.793645348  | 1.733558223 |
| AP151           | 0.029755585 | 0.970244415 | -1.311238582 | 0.397108306 |
| AP251           | 0.029740899 | 0.970259101 | -0.985848197 | 0.49614578  |
| AP3B2           | 0.029662094 | 0.970337906 | 1.881634969  | 3.992736507 |
| AP451           | 0.029634735 | 0.970365265 | 0.896720191  | 1.865396309 |
| APBA1           | 0.029610754 | 0.970389246 | -0.962263299 | 0.511910125 |
| APBB2           | 0.029480534 | 0.970519466 | 0.913239416  | 1.883467202 |
| APCDD1          | 0.029466676 | 0.970533324 | -0.583049555 | 0.667381238 |
| APCDD1L-AS1     | 0.02938112  | 0.97061888  | 0.639413206  | 1.561957106 |
| APEH            | 0.029319433 | 0.970680567 | -3.242301284 | 0.104597204 |
| APEX1           | 0.029295655 | 0.970704345 | 1.396716516  | 2.722944037 |
| APH1B           | 0.029248618 | 0.970751382 | 1.41430041   | 2.666392688 |
| APIP            | 0.029215768 | 0.970784232 | 0.93278075   | 1.911629084 |
| APITD1          | 0.029210996 | 0.970789004 | -0.663069469 | 0.629657172 |
| APLF            | 0.029177463 | 0.970822537 | -0.760377167 | 0.588394536 |
| APLN            | 0.029154964 | 0.970845036 | -1.034606585 | 0.487496816 |
| APOA1BP         | 0.029120012 | 0.970879988 | 1.208942339  | 2.320593043 |
| APOB            | 0.029090286 | 0.970909714 | 1.152003047  | 2.222294949 |
| APOBEC3B        | 0.029035515 | 0.970964485 | -0.523769476 | 0.695142337 |
| APOBEC3G        | 0.029003815 | 0.970996185 | -0.791683771 | 0.577026283 |
| APOD            | 0.028970493 | 0.971029507 | -2.68373492  | 0.122392443 |
| APOL1           | 0.028947332 | 0.971052668 | -1.678140513 | 0.308488964 |
| APOL4           | 0.028887274 | 0.971112726 | -0.628921646 | 0.646470475 |
| APP             | 0.028876397 | 0.971123603 | 1.344749341  | 2.578518928 |
| APPL2           | 0.028860829 | 0.971139171 | 0.558752918  | 1.475565914 |
| APRT            | 0.028801372 | 0.971198628 | -1.198597308 | 0.427060927 |
| APTX            | 0.028702599 | 0.971297401 | -1.062945452 | 0.478445854 |
| AQP3            | 0.028646785 | 0.971353215 | 0.705601252  | 1.63129407  |
| AQP4-AS1        | 0.028581236 | 0.971418764 | -2.861692162 | 0.136678458 |
| AQP7            | 0.028549905 | 0.971450095 | -2.156815844 | 0.223982702 |
| AR              | 0.028505577 | 0.971494423 | 1.1462723    | 2.213664495 |
| ARF1            | 0.02848846  | 0.97151154  | 0.702186188  | 1.628299782 |
| ARFIP2          | 0.028478907 | 0.971521093 | 1.221021721  | 2.331873587 |
| ARHGAP10        | 0.028440887 | 0.971559113 | 1.044072353  | 2.083916753 |
| ARHGAP11A       | 0.028428594 | 0.971571406 | -0.708201686 | 0.609131226 |
| ARHGAP11B       | 0.02841145  | 0.97158855  | 0.820367335  | 1.766113639 |
| ARHGAP17        | 0.028306634 | 0.971693366 | 1.858740087  | 3.721284113 |
| ARHGAP22        | 0.028293635 | 0.971706365 | -1.082078995 | 0.469828309 |
| ARHGAP31        | 0.028280528 | 0.971719472 | -1.765274516 | 0.289832663 |
| ARHGAP8         | 0.028251023 | 0.971748977 | 0.871627636  | 1.841074464 |
| ARHGFE10        | 0.028216369 | 0.971783631 | 0.915714716  | 1.886798912 |
| ARHGFE28        | 0.028200151 | 0.97179849  | -0.979159129 | 0.506219995 |
| ARHGFEF33       | 0.028166819 | 0.971833181 | -1.998939749 | 0.223012866 |
| ARHGFEF37       | 0.02816332  | 0.97183668  | -0.974258748 | 0.508928446 |
| ARHGFEF39       | 0.028153266 | 0.971846734 | -1.260549591 | 0.415892425 |
| ARHGFEF40       | 0.028122799 | 0.971877201 | -1.836275047 | 0.277984553 |
| ARHGFEF9        | 0.02812057  | 0.97187943  | -0.964524845 | 0.510998734 |
| ARID1B          | 0.028114556 | 0.971885444 | 1.069268331  | 2.107812638 |

|            |             |             |              |             |
|------------|-------------|-------------|--------------|-------------|
| ARID5B     | 0.0281031   | 0.9718969   | -0.931280027 | 0.522483677 |
| ARIH2      | 0.028091668 | 0.971908332 | -1.94801227  | 0.25465991  |
| ARL13A     | 0.028039185 | 0.971960815 | -1.896995859 | 0.268307415 |
| ARL4A      | 0.028036696 | 0.971963304 | -2.483559555 | 0.177291321 |
| ARL4C      | 0.028017785 | 0.971982215 | -2.677178846 | 0.126790157 |
| ARLSA      | 0.028003768 | 0.971996232 | -2.271715475 | 0.166812729 |
| ARMC6      | 0.027986556 | 0.972013444 | -1.708187179 | 0.303409712 |
| ARNT       | 0.027952118 | 0.972047882 | -1.501884943 | 0.350661131 |
| ARNT2      | 0.027934499 | 0.972065501 | 0.707108396  | 1.63825671  |
| ARNTL      | 0.02792663  | 0.97207337  | -1.643910557 | 0.296885638 |
| ARPC4      | 0.027808464 | 0.972191536 | -1.026733827 | 0.486405153 |
| ARPC5L     | 0.027757293 | 0.972242707 | -1.123220156 | 0.451741715 |
| ARPIN      | 0.02775043  | 0.97224957  | -1.002723657 | 0.494895586 |
| ARRB2      | 0.027728291 | 0.972271709 | -2.054451466 | 0.24020248  |
| ARRDC1-AS1 | 0.027661522 | 0.972338478 | -1.27096223  | 0.410712162 |
| ARSD       | 0.027650766 | 0.972349234 | -1.430904987 | 0.369622005 |
| ASAP2      | 0.027633896 | 0.972366104 | -0.62147091  | 0.649692112 |
| ASB13      | 0.027572947 | 0.972427053 | -1.731379415 | 0.292159449 |
| ASB9       | 0.027572645 | 0.972427355 | -1.048973865 | 0.480887362 |
| ASF1B      | 0.027538903 | 0.972461097 | 0.855859111  | 1.82149683  |
| ASNA1      | 0.027435593 | 0.972564407 | 0.756377454  | 1.689340323 |
| ASNS       | 0.027350488 | 0.972649512 | 1.374102759  | 2.613912208 |
| ASPA       | 0.027344511 | 0.972655489 | -1.776631188 | 0.276213492 |
| ASS1       | 0.027300587 | 0.972699413 | 0.853250482  | 1.807158451 |
| ASTN1      | 0.027197139 | 0.972802861 | -1.299104562 | 0.406117672 |
| ASUN       | 0.027163124 | 0.972836876 | -2.345222614 | 0.188001098 |
| ATAD3A     | 0.027145679 | 0.972854321 | -1.748830471 | 0.297353975 |
| ATAD3C     | 0.027117625 | 0.972882375 | 0.971160251  | 1.962927068 |
| ATAT1      | 0.027026849 | 0.972973151 | 0.778815489  | 1.71594112  |
| ATE1-AS1   | 0.026968241 | 0.973031759 | -0.56114487  | 0.677611915 |
| ATF3       | 0.026958184 | 0.973041816 | -1.246734028 | 0.40794223  |
| ATF4       | 0.026860673 | 0.973139327 | 1.405100792  | 2.666351103 |
| ATF5       | 0.026850049 | 0.973149951 | 1.930178729  | 4.207288394 |
| ATF7       | 0.026812311 | 0.973187689 | -0.666045556 | 0.63007405  |
| ATG9B      | 0.026709473 | 0.973290527 | -1.368928986 | 0.385871404 |
| ATL1       | 0.026636822 | 0.973363178 | 0.579747747  | 1.495216193 |
| ATL2       | 0.026612473 | 0.973387527 | 1.151760198  | 2.22326973  |
| ATOX1      | 0.026608895 | 0.973391105 | 0.666047059  | 1.590699891 |
| ATP10B     | 0.026597543 | 0.973402457 | 1.811506635  | 3.66804517  |
| ATP10D     | 0.026558455 | 0.973441545 | -0.962454965 | 0.509646056 |
| ATP12A     | 0.026515254 | 0.973484746 | 1.010501479  | 2.029323342 |
| ATP1B3     | 0.026417855 | 0.973582145 | -0.930098563 | 0.524659659 |
| ATP1B3-AS1 | 0.026381441 | 0.973618559 | -1.425583957 | 0.369401618 |
| ATP2B4     | 0.026281405 | 0.973718595 | -1.164231247 | 0.437821722 |
| ATP5A1     | 0.02622648  | 0.97377352  | -2.587238616 | 0.154014299 |
| ATP5B      | 0.026169989 | 0.973830011 | 1.084584367  | 2.125090828 |
| ATP5C1     | 0.026166675 | 0.973833325 | 0.924183718  | 1.897748512 |
| ATP5D      | 0.026101189 | 0.973898811 | -0.678972185 | 0.624201682 |
| ATP5F1     | 0.026101089 | 0.973898911 | -1.078444771 | 0.473495603 |
| ATP5F1P1   | 0.026097448 | 0.973902552 | -0.667810807 | 0.626490239 |
| ATP5G1     | 0.026073888 | 0.973926112 | -2.705915131 | 0.14463933  |
| ATP5G2     | 0.026048644 | 0.973951356 | 0.521128428  | 1.435302487 |
| ATP5G3     | 0.026036451 | 0.973963549 | 0.740026943  | 1.67047321  |
| ATP5J2     | 0.026023767 | 0.973976233 | -1.225264717 | 0.426209191 |
| ATP5L      | 0.026001933 | 0.973998067 | 1.379613163  | 2.603398671 |
| ATP5O      | 0.025983295 | 0.974016705 | 0.666019362  | 1.588256527 |
| ATP6AP1L   | 0.025961541 | 0.974038459 | 0.842594353  | 1.796708552 |
| ATP6V0B    | 0.025944546 | 0.974055454 | -1.407030154 | 0.374459592 |
| ATP6V0D2   | 0.025928028 | 0.974071972 | -1.089818047 | 0.469695838 |
| ATP6V1F    | 0.025880091 | 0.974119909 | -1.412926924 | 0.372456562 |
| ATP8B2     | 0.025854392 | 0.974145608 | -1.75204745  | 0.283170122 |
| ATP8B3     | 0.025848121 | 0.974151879 | 0.69187599   | 1.622927557 |
| ATP9A      | 0.025837965 | 0.974162035 | 1.03129435   | 2.068512947 |
| ATXN1      | 0.025826531 | 0.974173469 | 0.805072542  | 1.753325851 |
| ATXN3      | 0.025806105 | 0.974193895 | 1.061020811  | 2.089889367 |
| ATXN7L2    | 0.025804025 | 0.974195975 | 1.030224896  | 2.044488658 |
| AUNIP      | 0.025764027 | 0.974235973 | -1.656959554 | 0.306507326 |
| AUP1       | 0.025730329 | 0.974269671 | 0.86331283   | 1.819751326 |
| AURKA      | 0.025727727 | 0.974272273 | -1.056626802 | 0.480201441 |
| AURKAIP1   | 0.02571057  | 0.97428943  | 0.927136682  | 1.902205421 |
| AURK8      | 0.025561005 | 0.974438995 | 0.863302833  | 1.819937087 |
| AVEN       | 0.025544168 | 0.974455832 | 0.808270771  | 1.752576539 |
| AVPI1      | 0.025538311 | 0.974461689 | -1.524139625 | 0.345709426 |
| AWAT1      | 0.0255318   | 0.9744682   | 0.696334632  | 1.621297289 |
| AWAT2      | 0.025449236 | 0.974550764 | 1.318533892  | 2.562644525 |
| AXDND1     | 0.025437237 | 0.974562763 | -0.661771728 | 0.630972425 |
| AXIN2      | 0.025391543 | 0.974608457 | -0.800834526 | 0.570516122 |
| AXL        | 0.025389024 | 0.974610976 | -2.737481134 | 0.103635096 |
| AZIN1-AS1  | 0.025373046 | 0.974626954 | -1.751277632 | 0.296867327 |
| B3GALT4    | 0.025343508 | 0.974656492 | -2.853600721 | 0.128943727 |
| B3GALT5    | 0.025295744 | 0.974704256 | -1.102972869 | 0.463700888 |
| B3GNT3     | 0.025291624 | 0.974708376 | 0.819333233  | 1.765789053 |
| B4GALT2    | 0.025274094 | 0.974725906 | -0.941550999 | 0.520508183 |
| B4GALT3    | 0.02527011  | 0.97472989  | 1.730990136  | 3.4976664   |
| BAALC      | 0.025047031 | 0.974952969 | 0.60514567   | 1.521362336 |
| BAALC-AS1  | 0.025045093 | 0.974954907 | -1.238727472 | 0.423046856 |
| BABAM1     | 0.025042778 | 0.974957222 | -2.11230736  | 0.207941277 |
| BACE1      | 0.025006224 | 0.974993776 | 0.521573953  | 1.435977391 |
| BACH2      | 0.024881565 | 0.975118435 | -1.66531648  | 0.315208128 |
| BAG2       | 0.024856866 | 0.975143134 | 1.501282991  | 2.875510687 |
| BAG3       | 0.024766895 | 0.975233105 | -1.033541127 | 0.487936782 |
| BAMBI      | 0.024748003 | 0.975251997 | -0.614009969 | 0.652754541 |
| BARX2      | 0.024655877 | 0.975344123 | -1.777068359 | 0.291150547 |

|           |             |             |              |             |
|-----------|-------------|-------------|--------------|-------------|
| BAX       | 0.024616873 | 0.975383127 | 1.115921056  | 2.176258038 |
| BAZ2B     | 0.024548549 | 0.975451451 | -1.117555524 | 0.455486637 |
| BBOX1     | 0.024471766 | 0.975528234 | -0.773075002 | 0.584369135 |
| BBOX1-AS1 | 0.024437691 | 0.975562309 | 1.023032505  | 2.033006574 |
| BBS9      | 0.024425388 | 0.975574612 | 1.648505619  | 3.31352906  |
| BCAR3     | 0.024409402 | 0.975590598 | -2.750732393 | 0.103784941 |
| BCAS1     | 0.024401022 | 0.975598978 | 1.177985009  | 2.265376895 |
| BCAS2P2   | 0.024376191 | 0.975623809 | 0.911343918  | 1.888558362 |
| BCAS3     | 0.024341974 | 0.975658026 | 0.593307523  | 1.508929278 |
| BCAT1     | 0.024285042 | 0.975714958 | -1.781621057 | 0.289643353 |
| BCAT2     | 0.024234451 | 0.975765549 | 1.105620012  | 2.172435144 |
| BCCIP     | 0.024196467 | 0.975803533 | -2.318320682 | 0.18556858  |
| BCHE      | 0.024143915 | 0.975856085 | -3.409979782 | 0.079022897 |
| BCKDK     | 0.024014168 | 0.975985832 | -1.998297874 | 0.223047116 |
| BCL11B    | 0.023958063 | 0.976041937 | 0.952049327  | 1.935085324 |
| BCL2      | 0.023945472 | 0.976054528 | -1.801231997 | 0.262997971 |
| BCL2L14   | 0.023874839 | 0.976125161 | 1.347521445  | 2.601991068 |
| BCL6      | 0.023831142 | 0.976168858 | -1.561232363 | 0.333664502 |
| BCL7C     | 0.023822228 | 0.976177772 | -1.962279449 | 0.250049377 |
| BCS1L     | 0.023802313 | 0.976197687 | 0.756979326  | 1.690056373 |
| BCYRN1    | 0.023778593 | 0.976221407 | 0.862693694  | 1.823250236 |
| BDH1      | 0.023743263 | 0.976256737 | -1.292588695 | 0.40776808  |
| BDKRB2    | 0.023742653 | 0.976257347 | -0.904923892 | 0.533791444 |
| BEAN1     | 0.023703403 | 0.976296597 | -2.265290134 | 0.179132816 |
| BEND7     | 0.023645516 | 0.976354484 | -1.667626694 | 0.296873076 |
| BEST4     | 0.023640154 | 0.976359846 | -1.286816565 | 0.407943823 |
| BFAR      | 0.023622947 | 0.976377053 | -0.980743983 | 0.504278159 |
| BHLHB9P1  | 0.023588147 | 0.976411853 | -2.212980767 | 0.211952433 |
| BHLHE40   | 0.023563136 | 0.976436864 | -1.047575728 | 0.483162987 |
| BHLHE41   | 0.02354176  | 0.97645824  | -2.244768836 | 0.209776627 |
| BICC1     | 0.023535655 | 0.976464345 | -2.041552386 | 0.238965035 |
| BID       | 0.023532364 | 0.976467636 | -2.365935172 | 0.154183672 |
| BIN2      | 0.02341623  | 0.97658377  | -0.761965548 | 0.589184308 |
| BIRCS     | 0.023398965 | 0.976601035 | -2.314221637 | 0.171295397 |
| BLACAT1   | 0.023395295 | 0.976604705 | -1.704633105 | 0.306391421 |
| BLM       | 0.023386053 | 0.976613947 | 0.902727005  | 1.876231964 |
| BLMH      | 0.02338554  | 0.976661446 | 1.32914827   | 2.586079322 |
| BLNK      | 0.02332762  | 0.976667238 | -1.337108424 | 0.393129391 |
| BLOC1S4   | 0.023289885 | 0.976710115 | -2.747760546 | 0.113364975 |
| BLZF2P    | 0.023266815 | 0.976733185 | 0.778235588  | 1.716285475 |
| BMP2KL    | 0.023220153 | 0.976779847 | 1.487639396  | 2.823924812 |
| BMP4      | 0.023182638 | 0.976817362 | -1.01300744  | 0.490531392 |
| BMP6      | 0.02312601  | 0.97687399  | -2.074068295 | 0.1989825   |
| BMP7      | 0.023104016 | 0.976895984 | -0.92319678  | 0.52596399  |
| BMPRIAPS1 | 0.023097845 | 0.976902155 | -1.490918708 | 0.342835047 |
| BMPR2     | 0.023027309 | 0.976972691 | -1.150817329 | 0.445920019 |
| BMS1      | 0.022998868 | 0.977001132 | 0.803508453  | 1.745455232 |
| BNC1      | 0.022985663 | 0.977014337 | -1.867687248 | 0.255950304 |
| BNIP1     | 0.022955289 | 0.977044711 | 0.747583073  | 1.679727135 |
| BNIP3     | 0.022945732 | 0.977054268 | -2.038270583 | 0.227485666 |
| BNIPL     | 0.022877018 | 0.977122982 | -2.011778852 | 0.247409948 |
| BOC       | 0.022845097 | 0.977154903 | -0.754396451 | 0.590146473 |
| BOD1      | 0.022785564 | 0.977214436 | 2.000774536  | 4.393876262 |
| BOLA3     | 0.022777889 | 0.977222111 | -1.887515895 | 0.253137813 |
| BOP1      | 0.02277671  | 0.97722329  | -1.671818927 | 0.302485263 |
| BRCA2     | 0.02276271  | 0.97723729  | 1.2497557    | 2.434081065 |
| BRD9      | 0.02266697  | 0.97733303  | -0.712908024 | 0.608240366 |
| BRI3BP    | 0.022652063 | 0.977347937 | 0.92238668   | 1.906376477 |
| BRIX1     | 0.022635877 | 0.977364123 | -2.149567946 | 0.194300496 |
| BSPRY     | 0.022550168 | 0.977449832 | 1.033736631  | 2.064658846 |
| BTBD16    | 0.022478589 | 0.977521411 | 0.533185512  | 1.448136864 |
| BTBD3     | 0.022359101 | 0.977640899 | -1.268641444 | 0.408772227 |
| BTBD8     | 0.022310521 | 0.977689479 | -1.712430283 | 0.28915419  |
| BTC       | 0.022289362 | 0.977710638 | -1.249007083 | 0.411459905 |
| BTF3      | 0.02227787  | 0.977772213 | 0.823197088  | 1.769814255 |
| BUB1      | 0.022224412 | 0.977775588 | 0.542304923  | 1.457935972 |
| BUB1B     | 0.022140794 | 0.977859206 | -2.40590966  | 0.186025335 |
| BUD31     | 0.022102685 | 0.977897315 | -0.845557576 | 0.556469841 |
| BVE5      | 0.02203878  | 0.97796122  | -0.826551949 | 0.559878706 |
| BVSL      | 0.022036889 | 0.977963111 | 0.5755874    | 1.490800642 |
| BZW2      | 0.021935904 | 0.978064096 | -0.96777238  | 0.511181225 |
| C10orf113 | 0.021915419 | 0.978084581 | -1.024389083 | 0.486212904 |
| C10orf2   | 0.021898589 | 0.978101411 | -3.248476156 | 0.092834075 |
| C11orf24  | 0.021885918 | 0.978114082 | -0.78269133  | 0.578184775 |
| C11orf63  | 0.021822355 | 0.978177645 | -2.102834054 | 0.228456889 |
| C11orf80  | 0.021820006 | 0.978179994 | -1.861358675 | 0.257479346 |
| C12orf42  | 0.021757454 | 0.978242546 | -1.874722446 | 0.242710365 |
| C12orf45  | 0.021721446 | 0.978278554 | -0.546522599 | 0.684559783 |
| C12orf54  | 0.021681301 | 0.978318699 | -1.814740949 | 0.275744312 |
| C12orf65  | 0.021626287 | 0.978373713 | -0.896996904 | 0.536761236 |
| C12orf73  | 0.021455019 | 0.978544981 | -1.162595838 | 0.446686018 |
| C14orf169 | 0.021444586 | 0.97855414  | -1.863977381 | 0.248461807 |
| C14orf2   | 0.021428948 | 0.978571052 | -2.043999535 | 0.199658411 |
| C14orf37  | 0.021424256 | 0.978575744 | -0.855886286 | 0.547739381 |
| C16orf13  | 0.021380869 | 0.978619131 | -0.738252615 | 0.598916962 |
| C16orf45  | 0.021350729 | 0.978649271 | -1.75298544  | 0.283269154 |
| C16orf91  | 0.021276552 | 0.978723448 | 1.147947661  | 2.221951878 |
| C17orf49  | 0.021248902 | 0.978751098 | -1.186306167 | 0.436671896 |
| C17orf53  | 0.021213368 | 0.978786632 | 0.551522612  | 1.465966721 |
| C17orf89  | 0.021197959 | 0.978802041 | 1.325818027  | 2.50859437  |
| C17orf96  | 0.021148249 | 0.978851751 | 0.527473441  | 1.442086276 |
| C18orf15  | 0.021114011 | 0.978885989 | -3.681808603 | 0.067973551 |
| C18orf21  | 0.0211103   | 0.9788897   | -1.666134852 | 0.315037227 |

|              |             |             |              |             |
|--------------|-------------|-------------|--------------|-------------|
| C19orf43     | 0.021058364 | 0.978941636 | -1.85650064  | 0.274667026 |
| C19orf48     | 0.020989431 | 0.979010569 | -0.8725604   | 0.546103302 |
| C19orf53     | 0.020969352 | 0.979030648 | -2.492733151 | 0.175676238 |
| C19orf70     | 0.020897707 | 0.979102293 | -1.535268651 | 0.332472166 |
| C1orf109     | 0.02088029  | 0.97911971  | 0.88203819   | 1.843859247 |
| C1orf115     | 0.02086361  | 0.97913639  | 0.680589004  | 1.602906889 |
| C1orf116     | 0.020842134 | 0.979157866 | -0.79393214  | 0.574935237 |
| C1orf131     | 0.020813396 | 0.979186604 | 0.782564685  | 1.721309567 |
| C1orf145     | 0.020784038 | 0.979215962 | 1.789169906  | 3.479812941 |
| C1orf159     | 0.020714805 | 0.979285195 | -1.915311472 | 0.242014518 |
| C1orf204     | 0.020688832 | 0.979311168 | -1.669973755 | 0.297674603 |
| C1orf43      | 0.020629536 | 0.979370464 | 0.816985244  | 1.764422113 |
| C1QBP        | 0.020604947 | 0.979395053 | -0.685340803 | 0.621564302 |
| C1QBPP2      | 0.020599418 | 0.979400582 | 0.718177267  | 1.645379305 |
| C1QTNF6      | 0.020595708 | 0.979404292 | -1.787538013 | 0.265451884 |
| C1R          | 0.020576814 | 0.979423186 | 0.96629675   | 1.954306181 |
| C1S          | 0.020539981 | 0.979460019 | -0.804880646 | 0.569551167 |
| C2orf194     | 0.020415706 | 0.979584294 | -2.261159293 | 0.171652922 |
| C2orf27      | 0.020349224 | 0.979650776 | -0.965313788 | 0.51204828  |
| C21orf91-OT1 | 0.020342866 | 0.979657134 | -1.055283513 | 0.475600046 |
| C2CD4A       | 0.020186514 | 0.979813486 | -1.49927054  | 0.333302445 |
| C2orf61      | 0.020142691 | 0.979857309 | -0.73268819  | 0.600463277 |
| C2orf71      | 0.020114487 | 0.979885513 | 0.799102036  | 1.741390876 |
| C2orf88      | 0.020094035 | 0.979905965 | -1.099185918 | 0.464964975 |
| C3           | 0.020089467 | 0.979910533 | -1.967331446 | 0.246792517 |
| C3orf62      | 0.020067979 | 0.979932021 | 0.604346493  | 1.521084862 |
| C3orf70      | 0.020051382 | 0.979948618 | -1.551119374 | 0.326690633 |
| C4orf36      | 0.019915988 | 0.980084012 | 0.922308299  | 1.895479148 |
| C4orf46      | 0.019858737 | 0.980141263 | 1.130056753  | 2.190792708 |
| C5           | 0.019834126 | 0.980165874 | -0.775267022 | 0.581285864 |
| C5orf34      | 0.019829718 | 0.980170282 | -0.661075954 | 0.631999405 |
| C5orf46      | 0.019796449 | 0.980203551 | -2.04772817  | 0.216494661 |
| C6orf141     | 0.019748963 | 0.980251037 | -1.450745242 | 0.363898675 |
| C6orf15      | 0.019723626 | 0.980276374 | -1.290652051 | 0.407384924 |
| C6orf223     | 0.019665211 | 0.980334789 | 0.804180057  | 1.746852163 |
| C6orf25      | 0.019664354 | 0.98035646  | -0.953439341 | 0.512049098 |
| C6orf48      | 0.019607005 | 0.980392995 | -2.427139272 | 0.178725161 |
| C7orf71      | 0.019583051 | 0.980416949 | -1.033110586 | 0.485477194 |
| C8orf33      | 0.019572556 | 0.980427444 | 1.214409453  | 2.321215397 |
| C8orf59P2    | 0.019559736 | 0.980440264 | -2.075772352 | 0.217814324 |
| C9orf3       | 0.019502188 | 0.980497812 | 0.923997307  | 1.914050478 |
| C9orf78      | 0.019488805 | 0.980511195 | 0.582063896  | 1.497708936 |
| C9orf84      | 0.019481206 | 0.980518794 | -0.638520357 | 0.642071018 |
| C9orf85      | 0.019407734 | 0.980592266 | 1.737375203  | 3.388558389 |
| C9orf9       | 0.019389985 | 0.980610015 | 0.668794055  | 1.58996213  |
| CA1          | 0.019380228 | 0.980619772 | -0.959622665 | 0.510840516 |
| CA13         | 0.019348805 | 0.980651195 | 1.110750906  | 2.162452247 |
| CA2          | 0.019341447 | 0.980658553 | -2.938997188 | 0.127068229 |
| CA3          | 0.019330858 | 0.980669142 | 0.641218804  | 1.560575466 |
| CA5BP1       | 0.019328396 | 0.980671604 | -1.9641019   | 0.22756672  |
| CA8          | 0.019319302 | 0.980680698 | -0.875048741 | 0.544666684 |
| CA9          | 0.019282996 | 0.980717004 | -0.810545049 | 0.569126157 |
| CABLES1      | 0.019259351 | 0.980740649 | -1.989279056 | 0.223480431 |
| CACHD1       | 0.019219955 | 0.980780045 | -0.582034314 | 0.667638    |
| CACNA1C      | 0.019208742 | 0.980791258 | -1.533140823 | 0.323568599 |
| CACNA1C-AS4  | 0.019186256 | 0.980813744 | -1.13156526  | 0.456062282 |
| CACNA1C-IT3  | 0.019158695 | 0.980841305 | -1.206312408 | 0.421246984 |
| CACNA1D      | 0.019135091 | 0.980864909 | 4.194068852  | 19.28677187 |
| CACNA1G      | 0.019123561 | 0.980876439 | -0.709829503 | 0.611134783 |
| CACYBP1      | 0.019083923 | 0.980916077 | -2.771074009 | 0.145982129 |
| CAD          | 0.019079887 | 0.980920113 | 0.974908848  | 1.969187821 |
| CADM3        | 0.019021457 | 0.980978543 | -1.303533575 | 0.401519374 |
| CALB1        | 0.019008434 | 0.980991566 | -0.68987346  | 0.61968368  |
| CALML3-AS1   | 0.018949499 | 0.981050501 | 1.313180756  | 2.508502763 |
| CALML4       | 0.018942855 | 0.981057145 | -1.059346536 | 0.479826327 |
| CALR         | 0.018890284 | 0.981109716 | 0.766043166  | 1.701967669 |
| CAMK2A       | 0.018871818 | 0.981128182 | 0.849957472  | 1.802713004 |
| CAMK2N1      | 0.018825917 | 0.981174083 | 1.120144651  | 2.186450928 |
| CAMKK1       | 0.018815119 | 0.981184881 | -1.921149606 | 0.256960522 |
| CAMSP1       | 0.018748383 | 0.981251617 | -1.974847249 | 0.253741721 |
| CANX         | 0.01873604  | 0.98126396  | -1.480999098 | 0.35370915  |
| CAPN15       | 0.018470901 | 0.981529099 | -0.968273849 | 0.510697678 |
| CAPN2        | 0.018433407 | 0.981566593 | -1.120902277 | 0.458998437 |
| CAPN3        | 0.018376826 | 0.981623174 | -1.220411871 | 0.424009825 |
| CAPN5        | 0.01835473  | 0.98164527  | 1.167407261  | 2.270261184 |
| CAPN8        | 0.018332688 | 0.981667312 | -2.312168809 | 0.195844353 |
| CAPN9        | 0.018327249 | 0.981672751 | -2.492144673 | 0.150323594 |
| CAPNS2       | 0.018237662 | 0.981762338 | -1.013377669 | 0.495327512 |
| CAPRN2       | 0.018233836 | 0.981766164 | 2.015280947  | 4.108042608 |
| CAPS2        | 0.018228139 | 0.981771861 | 1.077093351  | 2.110813526 |
| CARD16       | 0.018215105 | 0.981784895 | -0.65605916  | 0.634568328 |
| CARD18       | 0.018183025 | 0.981816975 | 1.368715587  | 2.58456636  |
| CARD8        | 0.018165975 | 0.981834025 | 0.652591975  | 1.575426008 |
| CARD9        | 0.018161254 | 0.981838746 | 1.540294287  | 3.008944199 |
| CARF         | 0.018148418 | 0.981851582 | 1.127138663  | 2.188150682 |
| CARS         | 0.018133637 | 0.981866363 | 0.607523777  | 1.523971851 |
| CARS2        | 0.018132443 | 0.981867557 | 1.358869427  | 2.603893803 |
| CASC15       | 0.018121527 | 0.981878473 | -1.595963131 | 0.3301602   |
| CASC18       | 0.018121003 | 0.981878997 | -3.32689723  | 0.098094515 |
| CASC21       | 0.018091718 | 0.981908282 | -2.580762552 | 0.138924681 |
| CASK         | 0.018063741 | 0.981936259 | -1.794802635 | 0.257927122 |
| CASP14       | 0.018051581 | 0.981948419 | -1.407549948 | 0.368191164 |
| CASP1P2      | 0.018015491 | 0.981984509 | -1.458578989 | 0.362926721 |



|               |             |             |              |             |
|---------------|-------------|-------------|--------------|-------------|
| CASP8         | 0.01798089  | 0.98201911  | -1.131728135 | 0.453627043 |
| CAST          | 0.017953303 | 0.982046697 | 1.102428871  | 2.148319565 |
| CAV2          | 0.017943704 | 0.982056296 | -1.706209042 | 0.289731319 |
| CBR1          | 0.017867419 | 0.982132581 | -1.796856936 | 0.281164787 |
| CBWD1         | 0.017819494 | 0.982180506 | 1.921716001  | 3.796829373 |
| CBWD5         | 0.0178173   | 0.9821827   | -2.367617844 | 0.159585559 |
| CBX1P1        | 0.017752183 | 0.982247817 | -2.730537949 | 0.105326013 |
| CBX2          | 0.017750338 | 0.982249662 | 1.234863387  | 2.354906544 |
| CCAT1         | 0.017729717 | 0.982270283 | -3.684167077 | 0.044713292 |
| CCBE1         | 0.01768147  | 0.98231853  | 1.088601786  | 2.127161601 |
| CCDC113       | 0.017646149 | 0.982353851 | -0.910248144 | 0.531984236 |
| CCDC136       | 0.017630032 | 0.982369968 | 0.564278569  | 1.47954086  |
| CCDC137       | 0.01760447  | 0.98239553  | -0.928612888 | 0.521040536 |
| CCDC138       | 0.017555318 | 0.982444682 | -1.667712224 | 0.303024191 |
| CCDC144NL-AS1 | 0.017551456 | 0.982448544 | 1.152081841  | 2.247970886 |
| CCDC146       | 0.017542269 | 0.982457731 | 0.783936212  | 1.72535956  |
| CCDC148       | 0.017532216 | 0.982467784 | -2.038800518 | 0.24282645  |
| CCDC150       | 0.01747502  | 0.98252498  | -2.079795363 | 0.236358964 |
| CCDC150P1     | 0.017464779 | 0.982535221 | 0.881847131  | 1.843424895 |
| CCDC158       | 0.01746043  | 0.98253957  | -1.180980206 | 0.43850388  |
| CCDC167       | 0.017411521 | 0.982588479 | -1.541689837 | 0.339660755 |
| CCDC169       | 0.017345982 | 0.982654018 | -3.954376975 | 0.060006746 |
| CCDC180       | 0.017228094 | 0.982771906 | -3.06209325  | 0.113213568 |
| CCDC191       | 0.017199199 | 0.982800801 | 0.639283161  | 1.558033984 |
| CCDC25        | 0.01712838  | 0.98287162  | -2.1343412   | 0.225722836 |
| CCDC3         | 0.017059887 | 0.982940113 | 0.890353197  | 1.854373388 |
| CCDC30        | 0.017044092 | 0.982955908 | -0.797470176 | 0.57356492  |
| CCDC36        | 0.016999918 | 0.983000082 | 1.231342189  | 2.372288786 |
| CCDC51        | 0.016999841 | 0.983000159 | 1.112538073  | 2.186933673 |
| CCDC53        | 0.016987963 | 0.983012037 | 0.593433738  | 1.509535715 |
| CCDC58        | 0.016921332 | 0.983078668 | 0.880341076  | 1.84152129  |
| CCDC59        | 0.01689414  | 0.98310586  | 1.007998007  | 2.011949412 |
| CCDC64        | 0.016808987 | 0.983191013 | 1.84132857   | 3.835343716 |
| CCDC67        | 0.01679184  | 0.98320816  | -1.005094021 | 0.492307404 |
| CCDC68        | 0.016753441 | 0.983246559 | -1.022790703 | 0.489462768 |
| CCDC7         | 0.016716055 | 0.983283945 | -1.332617144 | 0.39676037  |
| CCDC78        | 0.016692714 | 0.983307286 | -1.162515243 | 0.446547196 |
| CCDC80        | 0.016647188 | 0.983352812 | -1.22896902  | 0.426359193 |
| CCDC85C       | 0.016624564 | 0.983375436 | -1.77804108  | 0.272356025 |
| CCDC86        | 0.016545788 | 0.983454212 | 1.241938435  | 2.366968302 |
| CCDC88C       | 0.016542618 | 0.983457382 | 0.817537517  | 1.765269323 |
| CCL28         | 0.016534176 | 0.983465824 | -1.120829195 | 0.459747502 |
| CCL5          | 0.016435422 | 0.983564578 | 1.125211884  | 2.181933364 |
| CCNA1         | 0.016378953 | 0.983621047 | -1.263609166 | 0.410923764 |
| CCNB1         | 0.01637718  | 0.98362282  | 1.706532455  | 3.436276768 |
| CCNB1P1       | 0.016337311 | 0.983662689 | -1.989436696 | 0.250482666 |
| CCNB2         | 0.016318929 | 0.983681071 | -2.992876621 | 0.077431354 |
| CCND1         | 0.016286248 | 0.983713752 | -0.690806538 | 0.619088702 |
| CCNDBP1       | 0.016262889 | 0.983737111 | 0.900546318  | 1.868346915 |
| CCNE1         | 0.016258766 | 0.983741234 | -1.985713803 | 0.222957413 |
| CCNF          | 0.016251184 | 0.983748816 | 1.065188601  | 2.095641319 |
| CCNG1         | 0.016238423 | 0.983761577 | 1.057288439  | 2.081140893 |
| CCNL2P1       | 0.016220971 | 0.983779029 | 0.949187472  | 1.931042068 |
| CCPG1         | 0.016193333 | 0.983806667 | 1.33450603   | 2.526720741 |
| CCR1          | 0.016182745 | 0.983817255 | -0.830691993 | 0.561748031 |
| CCR3          | 0.016179258 | 0.983820742 | -0.8393065   | 0.558480442 |
| CCR5          | 0.016165649 | 0.983834351 | -1.530561318 | 0.344150596 |
| CT2           | 0.01616221  | 0.98383779  | -1.042817721 | 0.485317216 |
| CT3           | 0.016106011 | 0.983893989 | 0.783904466  | 1.722012228 |
| CT5           | 0.016102234 | 0.983897766 | -0.661134559 | 0.632023758 |
| CCT6A         | 0.01606724  | 0.98393276  | -2.904236131 | 0.082626547 |
| CCT7          | 0.016055526 | 0.983944474 | 0.593048727  | 1.50887626  |
| CCT8          | 0.016030371 | 0.983969629 | -2.432744168 | 0.184187169 |
| CCT8P1        | 0.016002372 | 0.983997628 | -1.951110773 | 0.250875675 |
| CD109         | 0.015911405 | 0.984088595 | 1.305863063  | 2.489887867 |
| CD14          | 0.01582737  | 0.98417263  | -2.159380446 | 0.188213182 |
| CD160         | 0.015783374 | 0.984216626 | -1.538122422 | 0.342028179 |
| CD180         | 0.015766    | 0.984234    | 0.849894551  | 1.803608498 |
| CD200         | 0.015749853 | 0.984250147 | -0.56321917  | 0.676570362 |
| CD200R1       | 0.015713648 | 0.984286352 | -1.642555132 | 0.311841046 |
| CD207         | 0.01570997  | 0.98429003  | -0.761475233 | 0.588312414 |
| CD320         | 0.015708839 | 0.984291161 | 1.038351453  | 2.079348916 |
| CD3EAP        | 0.015702076 | 0.984297924 | -2.217928359 | 0.200156985 |
| CD40          | 0.015678405 | 0.984321595 | -0.647240071 | 0.638439224 |
| CD59          | 0.015644236 | 0.984355764 | 1.132048827  | 2.213238329 |
| CD72          | 0.01561865  | 0.98438135  | -1.011781176 | 0.491972629 |
| CD96          | 0.015599662 | 0.984400338 | -1.198574462 | 0.424942288 |
| CD99P1        | 0.01559808  | 0.98440192  | -0.777324375 | 0.581817116 |
| CDC123        | 0.015581139 | 0.984418861 | -2.073963286 | 0.236777475 |
| CDC14A        | 0.015567047 | 0.984432953 | 1.737970974  | 3.411596883 |
| CDC20         | 0.015561424 | 0.984438576 | -0.962582015 | 0.512736339 |
| CDC20B        | 0.015521538 | 0.984478462 | -1.708499547 | 0.303807718 |
| CDC25A        | 0.015501272 | 0.984498728 | -1.325308855 | 0.392190792 |
| CDC25C        | 0.015488556 | 0.984511444 | -1.275516389 | 0.411955372 |
| CDC42EP1      | 0.015458196 | 0.984541804 | 1.607839879  | 3.097216599 |
| CDC42EP3      | 0.015454676 | 0.984545324 | -0.916074097 | 0.529846481 |
| CDC45         | 0.015397293 | 0.984602707 | -1.253721765 | 0.417764127 |
| CDC6          | 0.01530741  | 0.98469259  | -0.699999356 | 0.614232483 |
| CDCA2         | 0.015292952 | 0.984707048 | 1.772414013  | 3.709658988 |
| CDCA3         | 0.01526621  | 0.98473379  | -0.832642374 | 0.56089953  |
| CDCA4         | 0.015233161 | 0.984766839 | 1.30589626   | 2.478222647 |
| CDCA5         | 0.015197904 | 0.984802096 | -2.247183894 | 0.188225224 |
| CDCA7         | 0.015194872 | 0.984805128 | 2.571990278  | 7.507323458 |

|                |             |             |              |             |
|----------------|-------------|-------------|--------------|-------------|
| CDCA7L         | 0.015190859 | 0.984809141 | -0.935904519 | 0.522465683 |
| CDCA8          | 0.015110202 | 0.984889798 | -1.333232588 | 0.385812139 |
| CDH11          | 0.015101953 | 0.984898047 | -0.970899266 | 0.506148029 |
| CDH13          | 0.015088119 | 0.984911881 | -0.775190493 | 0.581508019 |
| CDH19          | 0.015082838 | 0.984917162 | 2.784640156  | 7.968533381 |
| CDK14          | 0.015048323 | 0.984951677 | 1.070221956  | 2.110941416 |
| CDK20          | 0.015037389 | 0.984962611 | -0.766502706 | 0.586202517 |
| CDK4           | 0.015035835 | 0.984964165 | 0.534252064  | 1.450019471 |
| CDKSRAP1       | 0.014960703 | 0.985039297 | -0.956235691 | 0.515223912 |
| CDK7           | 0.014946119 | 0.985053881 | 0.819301276  | 1.765217702 |
| CDKL1          | 0.014912436 | 0.985087564 | 1.248076486  | 2.390647442 |
| CDKL5          | 0.014900384 | 0.985099616 | 2.78873676   | 9.97300417  |
| CDKN1C         | 0.014796757 | 0.985203243 | 0.904128955  | 1.87161676  |
| CDKN3          | 0.014781149 | 0.985218851 | -1.647698594 | 0.311528288 |
| CDT1           | 0.014780706 | 0.985219294 | -2.250485525 | 0.183382542 |
| CEACAM1        | 0.014768708 | 0.985231292 | -1.263368022 | 0.415541376 |
| CEACAM6        | 0.014753159 | 0.985246841 | -0.898780381 | 0.5358206   |
| CEBPB          | 0.014745762 | 0.985254238 | 1.486548555  | 2.818602964 |
| CEBP2          | 0.014745655 | 0.985254345 | -1.976968321 | 0.25164847  |
| CECR5          | 0.014719178 | 0.985280822 | 0.815120761  | 1.759624223 |
| CEL            | 0.014661131 | 0.985338869 | 1.315813366  | 2.500199553 |
| CLF2           | 0.014613087 | 0.985386913 | -0.955900929 | 0.511495556 |
| CENMIP         | 0.014571926 | 0.985428074 | 0.58954866   | 1.505369523 |
| CENPA          | 0.014549082 | 0.985450918 | 1.324243795  | 2.534227924 |
| CENPBD1P1      | 0.014548855 | 0.985451145 | -3.358942053 | 0.090388422 |
| CENPH          | 0.014505723 | 0.985494277 | -2.357450772 | 0.169130158 |
| CENPM          | 0.01448747  | 0.98551253  | -2.232266501 | 0.212552373 |
| CENPN          | 0.014487194 | 0.985512806 | -1.060660746 | 0.478367691 |
| CENPO          | 0.014476526 | 0.985523474 | 1.287289779  | 2.451513236 |
| CENPP          | 0.014436947 | 0.985563053 | -2.684577175 | 0.139980827 |
| CENPV          | 0.014434258 | 0.985565742 | -1.052928174 | 0.481602278 |
| CENPW          | 0.014388856 | 0.985611144 | 0.706634409  | 1.634565339 |
| CEP126         | 0.014361692 | 0.985638308 | -2.144968177 | 0.224198212 |
| CEP164P1       | 0.014299858 | 0.985700142 | 0.737733807  | 1.671782564 |
| CEP250         | 0.014270189 | 0.985729811 | 0.609028769  | 1.527980994 |
| CEP295NL       | 0.014244484 | 0.98575516  | 0.700017862  | 1.625131887 |
| CEP72          | 0.014236449 | 0.985763551 | 0.680604103  | 1.603378905 |
| CEP85          | 0.014203974 | 0.985796026 | 0.870126313  | 1.828049466 |
| CERS2          | 0.014200185 | 0.985799815 | 1.592723644  | 3.053740841 |
| CES1           | 0.0141967   | 0.9858033   | 1.054435851  | 2.077034826 |
| CES3           | 0.014189489 | 0.985810511 | -2.13419552  | 0.213964898 |
| CFAP20         | 0.014171998 | 0.985828002 | 0.749053768  | 1.681791564 |
| CFAP53         | 0.01414753  | 0.98585247  | -1.270962229 | 0.404497127 |
| CFAP70         | 0.014124772 | 0.985875228 | 0.680107093  | 1.602927657 |
| CFAP97         | 0.014078849 | 0.985921151 | -1.954282721 | 0.254045387 |
| CFB            | 0.014063495 | 0.985936505 | -1.375232312 | 0.385270461 |
| CFL1           | 0.014056425 | 0.985943575 | 0.858010523  | 1.812787508 |
| CFL1P3         | 0.013985073 | 0.986014927 | -2.702479828 | 0.143426972 |
| CFLAR          | 0.013978969 | 0.986021031 | -2.013986443 | 0.216079464 |
| CFLAR-AS1      | 0.013928916 | 0.986071084 | -0.7994711   | 0.574472707 |
| CFTR           | 0.013911992 | 0.986088008 | -0.980398814 | 0.504925701 |
| CGNL1          | 0.013888939 | 0.986111061 | 0.760158695  | 1.694234032 |
| CGREF1         | 0.013838572 | 0.986161428 | 1.121291784  | 2.176431502 |
| CH17-140K24.3  | 0.013796272 | 0.986203728 | -1.210871399 | 0.426367859 |
| CH17-140K24.5  | 0.013761859 | 0.986238141 | -1.191942821 | 0.43125728  |
| CH17-140K24.6  | 0.013734168 | 0.986265832 | -1.448628724 | 0.354870302 |
| CH17-360D5.3   | 0.013704359 | 0.986295641 | -1.514593239 | 0.342160843 |
| CH17-373J23.1  | 0.013695535 | 0.986304465 | 2.106681839  | 4.673831109 |
| CH17-76K2.6    | 0.01367005  | 0.98632995  | 0.557286753  | 1.472907477 |
| CH507-154810.2 | 0.013587746 | 0.986412254 | 0.835200898  | 1.794647297 |
| CH507-513H4.1  | 0.013587365 | 0.986412635 | 2.042469423  | 4.348984201 |
| CHAC2          | 0.013573891 | 0.986426109 | -1.049626638 | 0.482553712 |
| CHAF1A         | 0.013500173 | 0.986499827 | -1.102489482 | 0.465578873 |
| CHAF1B         | 0.013491439 | 0.986508561 | 0.726282613  | 1.658861447 |
| CHCHD2         | 0.013453303 | 0.986546697 | 1.008256828  | 2.012130884 |
| CHCHD4         | 0.013444091 | 0.986555909 | -0.845318847 | 0.555996069 |
| CHD1L          | 0.013421272 | 0.986578728 | 0.554850326  | 1.469060647 |
| CHD6           | 0.013383511 | 0.986616489 | -0.722322931 | 0.603485326 |
| CHD7           | 0.013358685 | 0.986641315 | -1.034843528 | 0.487434352 |
| CHEK2          | 0.013356856 | 0.986643144 | -2.434469695 | 0.147569215 |
| CHKA           | 0.01334744  | 0.98665256  | 1.028394666  | 2.042363463 |
| CHL1           | 0.013278457 | 0.986721543 | -2.755070713 | 0.144977208 |
| CHODL          | 0.013270227 | 0.986729773 | -2.08688779  | 0.234640157 |
| CHODL-AS1      | 0.013268468 | 0.986731532 | 1.005494745  | 2.017022806 |
| CHPT1          | 0.013244051 | 0.986755949 | 0.895806125  | 1.865463612 |
| CHRM3          | 0.013243899 | 0.986756101 | -0.803009086 | 0.572275608 |
| CHRM3-AS2      | 0.013240604 | 0.986759396 | -1.648938856 | 0.298898647 |
| CHST1          | 0.013212752 | 0.986787248 | -0.58031839  | 0.668721773 |
| CHST10         | 0.013211835 | 0.986788165 | -1.014237183 | 0.493543413 |
| CHST11         | 0.013152043 | 0.986847957 | 0.602599133  | 1.521278143 |
| CHST15         | 0.013151213 | 0.986848787 | 1.372852513  | 2.665731119 |
| CHST2          | 0.013097677 | 0.986902323 | 1.070608642  | 2.116095082 |
| CHST4          | 0.013065531 | 0.986934469 | 1.067651847  | 2.097939035 |
| CHST9          | 0.013037605 | 0.986962395 | -1.576027389 | 0.331023959 |
| CIAPIN1        | 0.013030647 | 0.986969353 | -0.97362196  | 0.508596579 |
| CIB1           | 0.01300654  | 0.98699346  | 1.019648259  | 2.031972456 |
| CIB4           | 0.012998006 | 0.987001994 | -0.983133213 | 0.502005904 |
| CILP           | 0.012950197 | 0.987049803 | -2.334597641 | 0.197456993 |
| CINP           | 0.012872671 | 0.987127329 | -1.410255301 | 0.364944977 |
| CIPC           | 0.012869697 | 0.987130303 | 0.732455935  | 1.66153718  |
| CIRH1A         | 0.012865836 | 0.987134164 | -2.467202814 | 0.141676395 |
| CISD1          | 0.012816316 | 0.987183684 | -2.671091397 | 0.142809335 |
| CISD3          | 0.012816288 | 0.987183712 | 0.871389302  | 1.830131996 |

|           |             |             |              |             |
|-----------|-------------|-------------|--------------|-------------|
| CIT       | 0.012794454 | 0.987205546 | -1.654530362 | 0.316979822 |
| CKMT1A    | 0.01279074  | 0.98720926  | -1.769182187 | 0.274542097 |
| CKMT1B    | 0.012737069 | 0.987262931 | -1.29383858  | 0.394366369 |
| CKS1B     | 0.012726036 | 0.987273964 | 0.57945487   | 1.497041871 |
| CKS2      | 0.012662285 | 0.987337715 | -0.782567686 | 0.57913664  |
| CLCA3P    | 0.012660613 | 0.987339387 | 1.190364004  | 2.283708038 |
| CLCN2     | 0.012654345 | 0.987345655 | -1.348018472 | 0.381479038 |
| CLDN18    | 0.012644115 | 0.987355885 | -1.365144658 | 0.38815098  |
| CLDN8     | 0.012599618 | 0.987400382 | -0.706565749 | 0.612472601 |
| CLEC1A    | 0.012577778 | 0.987422222 | 2.24760697   | 4.762717322 |
| CLEC2D    | 0.012569126 | 0.987430874 | 0.628227021  | 1.54830246  |
| CLEC4F    | 0.01255657  | 0.98744343  | 1.449075896  | 2.732258804 |
| CLEC7A    | 0.012543524 | 0.987456476 | -1.370025416 | 0.372392836 |
| CLGN      | 0.012531837 | 0.987468163 | -1.991094861 | 0.235547436 |
| CLIC1     | 0.012485253 | 0.987514747 | -1.453934869 | 0.353171505 |
| CLIC5     | 0.012477857 | 0.987522143 | -0.884820189 | 0.53969179  |
| CLIP1     | 0.012422793 | 0.987577207 | -1.467708344 | 0.360311347 |
| CLIP1-AS1 | 0.012389686 | 0.987610314 | -0.67388617  | 0.624971992 |
| CLIP4     | 0.012386956 | 0.987613044 | 0.784436204  | 1.723981914 |
| CLMP      | 0.012270996 | 0.987729004 | -1.799994722 | 0.286369394 |
| CLN6      | 0.012220685 | 0.987779315 | 0.951987608  | 1.945053666 |
| CLN8      | 0.01221418  | 0.98778582  | -0.999347077 | 0.498451144 |
| CLNS1A    | 0.012174234 | 0.987825766 | -2.395078709 | 0.167371945 |
| CLP1      | 0.012125813 | 0.987874187 | -0.89458453  | 0.537494113 |
| CLPB      | 0.012113869 | 0.987886131 | 1.368048281  | 2.620199525 |
| CLPP      | 0.012107103 | 0.987892897 | -0.876763393 | 0.54405886  |
| CLPTM1L   | 0.012098001 | 0.987901999 | 3.265463382  | 12.9329706  |
| CLPX      | 0.012061529 | 0.987938471 | 1.927990301  | 4.166662733 |
| CLUHP3    | 0.012005893 | 0.987994107 | 0.876221983  | 1.836022623 |
| CLUL1     | 0.01198396  | 0.98801604  | -1.409937055 | 0.375673668 |
| CMAHP     | 0.011875375 | 0.988124625 | 1.065780535  | 2.106117949 |
| CMPK2     | 0.011873722 | 0.988126278 | 0.746275129  | 1.681302967 |
| CMSS1     | 0.011873235 | 0.988126765 | -1.12699143  | 0.457723821 |
| CMTM3     | 0.011861721 | 0.988138279 | -1.249557397 | 0.41138534  |
| CMTM7     | 0.011834046 | 0.988165954 | 0.853293924  | 1.807332597 |
| CNBP      | 0.011827447 | 0.988172553 | 0.830780689  | 1.779100814 |
| CNDP2     | 0.011781436 | 0.988218564 | 1.232215243  | 2.349622309 |
| CNGA1     | 0.011777517 | 0.988222483 | 0.819203739  | 1.76625335  |
| CNIH3     | 0.0117317   | 0.9882683   | 0.71489956   | 1.646097853 |
| CNP       | 0.011692658 | 0.988307342 | -0.587373955 | 0.665197103 |
| CNPY2     | 0.011682199 | 0.988317801 | 1.492515082  | 2.88348482  |
| CNTNAP2   | 0.011681882 | 0.988318118 | 1.723546328  | 3.465025172 |
| CNTRL     | 0.011639292 | 0.988360708 | -0.566853846 | 0.674954302 |
| COA4      | 0.011604666 | 0.988395334 | 0.860067181  | 1.815453749 |
| COA7      | 0.011593144 | 0.988406856 | -0.606975797 | 0.65525226  |
| COL17A1   | 0.011557191 | 0.988442809 | -1.387993744 | 0.375444026 |
| COL21A1   | 0.011543931 | 0.988456069 | 1.025609333  | 2.036112486 |
| COL25A1   | 0.011541567 | 0.988458433 | 0.61688618   | 1.534499034 |
| COL4A3BP  | 0.01154047  | 0.98845953  | -2.337018382 | 0.170912088 |
| COL8A1    | 0.011505807 | 0.988494193 | 0.863384182  | 1.825551118 |
| COL8A2    | 0.011494615 | 0.988505385 | 0.605312036  | 1.522228952 |
| COL9A3    | 0.011385592 | 0.988614408 | -0.629145013 | 0.646060453 |
| COLCA1    | 0.011376037 | 0.988623963 | -1.387905112 | 0.381623901 |
| COLGALT1  | 0.01129589  | 0.98870411  | -0.980005435 | 0.502579146 |
| COLGALT2  | 0.011283517 | 0.988716483 | 1.005683391  | 2.008885529 |
| COMM4D4   | 0.011248115 | 0.988751885 | 0.774369089  | 1.717678709 |
| COMP      | 0.01123798  | 0.98876202  | -1.063097445 | 0.477030155 |
| COMTD1    | 0.011231445 | 0.988768555 | 1.803250176  | 3.752897302 |
| COPRS     | 0.011216928 | 0.988783072 | 0.795920268  | 1.737006218 |
| COP53     | 0.011172401 | 0.988827599 | 1.257757656  | 2.40386287  |
| COP56     | 0.01116283  | 0.98883717  | -2.448973488 | 0.18094332  |
| COP21     | 0.011143545 | 0.988856455 | 1.139450834  | 2.213211115 |
| COP22     | 0.011143438 | 0.988856562 | -2.738257155 | 0.141943291 |
| COQ2      | 0.0111402   | 0.9888598   | 1.272388562  | 2.421525645 |
| COQ3      | 0.011130568 | 0.988869432 | 1.067847343  | 2.097798305 |
| CORO2A    | 0.011088614 | 0.988911386 | 0.811246134  | 1.754870505 |
| CORO2B    | 0.011077091 | 0.988922909 | -2.156939425 | 0.217019383 |
| COTL1     | 0.011050104 | 0.988949896 | 0.670807977  | 1.594245024 |
| COX14     | 0.011043745 | 0.988956255 | 1.05760381   | 2.105439738 |
| COX41     | 0.010980506 | 0.989019494 | 0.832235983  | 1.781157812 |
| COX5A     | 0.010917972 | 0.989082028 | 1.081830263  | 2.14075718  |
| COX5B     | 0.010910987 | 0.989089013 | -1.066577479 | 0.477382554 |
| COX6B1    | 0.010898533 | 0.989101467 | 0.587334007  | 1.502842301 |
| COX6C     | 0.010879379 | 0.989120621 | 0.794852216  | 1.735974246 |
| COX7A2L   | 0.010839998 | 0.989160002 | -1.631169484 | 0.308612153 |
| COX7B     | 0.010825958 | 0.989174042 | -2.08744993  | 0.216049959 |
| COX7C     | 0.010816783 | 0.989183217 | 0.811594306  | 1.759076672 |
| COX8A     | 0.010805646 | 0.989194354 | -2.124668666 | 0.203118693 |
| CPEB2     | 0.01080059  | 0.98919941  | 0.728379103  | 1.658367017 |
| CPEB2-AS1 | 0.010791621 | 0.989208379 | -1.912018328 | 0.262357437 |
| CPEB3     | 0.010784718 | 0.989215282 | 1.132059138  | 2.195983359 |
| CPNE2     | 0.01076455  | 0.98923545  | 0.782923945  | 1.720856714 |
| CPNE7     | 0.010737382 | 0.989262618 | -2.282085618 | 0.188822177 |
| CPPED1    | 0.010686431 | 0.989313569 | 1.071075817  | 2.112809635 |
| CPQ       | 0.010684283 | 0.989315717 | -0.880907172 | 0.539206488 |
| CPSF3     | 0.010661389 | 0.989338611 | -0.841779818 | 0.557299602 |
| CPT1A     | 0.010628739 | 0.989371261 | -1.295435481 | 0.404983308 |
| CPT1C     | 0.010593945 | 0.989406055 | -3.019998584 | 0.112832483 |
| CPT2      | 0.010580541 | 0.989419459 | 0.709047319  | 1.635913166 |
| CPVL      | 0.010569981 | 0.989430019 | 0.690286811  | 1.614124024 |
| CREB3L2   | 0.010559854 | 0.989440146 | 1.13957438   | 2.216516989 |
| CREB5     | 0.010532615 | 0.989467385 | 0.923391748  | 1.896831244 |
| CREBRF    | 0.010492101 | 0.989507899 | -1.917960174 | 0.25719745  |

|                |              |             |              |             |
|----------------|--------------|-------------|--------------|-------------|
| CRIM1          | 0.010465516  | 0.989534484 | -3.358699333 | 0.07647065  |
| CRISP3         | 0.010454715  | 0.989545285 | 0.976106838  | 1.967365455 |
| CRISPLD1       | 0.010395299  | 0.989604701 | -1.10775821  | 0.463144673 |
| CRMP1          | 0.01033552   | 0.98966448  | 2.798105465  | 9.087866799 |
| CROCCP3        | 0.010282885  | 0.989717115 | -1.991616788 | 0.24806432  |
| CRTPAP         | 0.010266384  | 0.989733616 | -1.305827965 | 0.401627113 |
| CRYM-AS1       | 0.01026302   | 0.98973698  | 1.475609248  | 2.854642137 |
| CS             | 0.010218786  | 0.989781214 | -0.55673323  | 0.679813638 |
| CSEL1          | 0.010205183  | 0.989794817 | -3.088452738 | 0.114694139 |
| CSF1           | 0.01019515   | 0.98980485  | 1.308340098  | 2.476876995 |
| CSGALNACT1     | 0.010164239  | 0.989835761 | -0.864458996 | 0.547017707 |
| CSPG5          | 0.010150672  | 0.989849328 | -0.703318114 | 0.613979431 |
| CSRNP1         | 0.010131199  | 0.989868801 | 1.456030125  | 2.744325746 |
| CSRNP2         | 0.010088502  | 0.989911498 | 0.842609379  | 1.793549634 |
| CSTB           | 0.010087336  | 0.989912664 | -2.297927385 | 0.185747765 |
| CTA-360L10.1   | 0.010086112  | 0.989913888 | -2.763104842 | 0.139674496 |
| CTA-392C11.1   | 0.010068673  | 0.989931327 | 2.084848003  | 4.724925885 |
| CTA-392E5.1    | 0.010065691  | 0.989934309 | -0.914190641 | 0.530472669 |
| CTA-398F10.2   | 0.010063263  | 0.989936737 | -0.742559926 | 0.597652515 |
| CTA-445C9.14   | 0.010059131  | 0.989940869 | -1.253652195 | 0.419150378 |
| CTB-113P19.1   | 0.010056648  | 0.989943352 | 0.655520739  | 1.575721597 |
| CTB-174D11.1   | 0.010052544  | 0.989947456 | 1.238140996  | 2.397250726 |
| CTB-174D11.2   | 0.010044582  | 0.989955418 | 1.209414786  | 2.314742455 |
| CTB-50L17.14   | 0.010019378  | 0.989980622 | 0.75526867   | 1.688995366 |
| CTB-55O6.8     | 0.010001664  | 0.989998336 | -1.569802226 | 0.326503653 |
| CTB-73N10.1    | 0.0099959305 | 0.990040695 | 1.325109868  | 2.505878434 |
| CTB-92J24.3    | 0.009930518  | 0.990069482 | 0.586397078  | 1.50471353  |
| CTC-203F4.2    | 0.009922459  | 0.990077541 | 0.903854899  | 1.871936391 |
| CTC-204F22.1   | 0.009915436  | 0.990084564 | -0.946980491 | 0.517777416 |
| CTC-236F12.4   | 0.009911999  | 0.990088001 | 0.581403864  | 1.496846091 |
| CTC-251D13.1   | 0.009902137  | 0.990097863 | 2.315058078  | 5.254761852 |
| CTC-254B4.1    | 0.009897708  | 0.990102292 | -1.50874678  | 0.351161828 |
| CTC-301O7.4    | 0.009870502  | 0.990129498 | -1.605163291 | 0.327920171 |
| CTC-321K16.1   | 0.009849158  | 0.990150842 | -3.955718708 | 0.043201122 |
| CTC-321K16.4   | 0.009842948  | 0.990157052 | -3.472850781 | 0.089262219 |
| CTC-325H20.4   | 0.009841599  | 0.990158401 | 0.802390684  | 1.745570346 |
| CTC-325H20.7   | 0.009828618  | 0.990171382 | -0.903596631 | 0.532947469 |
| CTC-327F10.4   | 0.009827644  | 0.990172356 | 0.768579507  | 1.703878194 |
| CTC-327F10.5   | 0.00980684   | 0.99019316  | -1.032096141 | 0.488290196 |
| CTC-344H19.6   | 0.0097971    | 0.9902029   | 0.869528032  | 1.829618178 |
| CTC-455F18.1   | 0.009773778  | 0.990226222 | -1.071775495 | 0.469600553 |
| CTC-459M5.1    | 0.009746914  | 0.990253086 | -1.652463482 | 0.305340842 |
| CTC-490E21.11  | 0.009732557  | 0.990267443 | 1.158729925  | 2.232659446 |
| CTC-498M16.2   | 0.009651397  | 0.990348603 | 1.151398581  | 2.236490335 |
| CTC-523E23.5   | 0.00965116   | 0.99034884  | 0.793311411  | 1.734618376 |
| CTC-558O2.1    | 0.00957064   | 0.99042936  | 0.660857933  | 1.582122041 |
| CTC-806A22.1   | 0.009538374  | 0.990461626 | -2.399824449 | 0.143658518 |
| CTD-2002H8.2   | 0.009532006  | 0.990467994 | -1.02841352  | 0.489259355 |
| CTD-2008L17.2  | 0.009518461  | 0.990481539 | -1.955538703 | 0.254214741 |
| CTD-2015A6.1   | 0.009509195  | 0.990490805 | -1.261501277 | 0.415980956 |
| CTD-2015A6.2   | 0.009484813  | 0.990515187 | -0.906023452 | 0.530827583 |
| CTD-2015G9.2   | 0.009431868  | 0.990568132 | 1.069753323  | 2.104907462 |
| CTD-2016O11.1  | 0.009361657  | 0.990638343 | -0.821745536 | 0.562755363 |
| CTD-2017D11.1  | 0.009341447  | 0.990658553 | -0.8975913   | 0.536735077 |
| CTD-2017D11.2  | 0.009339576  | 0.990660424 | 0.850411233  | 1.804596123 |
| CTD-2024I7.18  | 0.009302838  | 0.990697162 | -1.109788711 | 0.462553899 |
| CTD-2027I19.2  | 0.00929443   | 0.99070557  | -1.951071736 | 0.247270922 |
| CTD-2027I19.3  | 0.009268453  | 0.990731547 | -3.204057588 | 0.094098848 |
| CTD-2033D15.2  | 0.0091849    | 0.9908151   | 0.783014079  | 1.725914646 |
| CTD-2066L21.3  | 0.009138835  | 0.990861165 | -0.921764328 | 0.525354172 |
| CTD-2171N6.1   | 0.009133447  | 0.990866553 | -1.061356125 | 0.475058622 |
| CTD-2192I16.26 | 0.009119817  | 0.990880183 | 0.914307634  | 1.885607315 |
| CTD-2201E18.3  | 0.00909613   | 0.99090387  | 0.974402608  | 1.966713345 |
| CTD-2201E9.1   | 0.009078543  | 0.990921457 | 1.44219323   | 2.739009731 |
| CTD-2201E9.2   | 0.009074402  | 0.990925598 | 0.542528076  | 1.456637435 |
| CTD-2206N4.4   | 0.009029254  | 0.990970746 | -0.535531413 | 0.688914683 |
| CTD-2216M2.1   | 0.009014551  | 0.990985449 | 0.544625138  | 1.458814666 |
| CTD-2260A17.1  | 0.00900989   | 0.99099011  | -1.0882897   | 0.469777629 |
| CTD-2260A17.2  | 0.00900655   | 0.99099345  | 1.105187035  | 2.152349743 |
| CTD-2265D6.2   | 0.008993279  | 0.991006721 | -0.950771392 | 0.513849609 |
| CTD-2270P14.1  | 0.0089579    | 0.9910421   | -2.221030878 | 0.1793612   |
| CTD-2278I10.4  | 0.008913779  | 0.991086221 | -1.665460794 | 0.314649059 |
| CTD-2280E9.1   | 0.008909878  | 0.991090122 | -3.038859826 | 0.107419021 |
| CTD-2303H24.2  | 0.008887851  | 0.991112149 | -1.084168828 | 0.468697502 |
| CTD-2325P2.4   | 0.008824996  | 0.991175004 | -0.721950968 | 0.605654739 |
| CTD-2337A12.1  | 0.008786169  | 0.991213831 | -0.872564767 | 0.545981566 |
| CTD-2368P22.1  | 0.008776979  | 0.991223021 | -0.749187568 | 0.594622446 |
| CTD-2373H9.3   | 0.008740768  | 0.991259232 | -0.719480049 | 0.606580359 |
| CTD-2373H9.5   | 0.008738228  | 0.991261772 | -0.77937113  | 0.581317171 |
| CTD-2510F5.4   | 0.008735244  | 0.991264756 | -2.53375525  | 0.162536617 |
| CTD-2515H24.2  | 0.008725537  | 0.991274463 | 1.310668709  | 2.486490158 |
| CTD-2515H24.4  | 0.008713654  | 0.991286346 | 0.806032419  | 1.7524089   |
| CTD-2516F10.2  | 0.00870165   | 0.99129835  | 0.853524782  | 1.807077864 |
| CTD-2540L5.9   | 0.008696017  | 0.991303983 | 0.748370266  | 1.683716245 |
| CTD-2541I13.1  | 0.008680894  | 0.991319106 | -1.514790081 | 0.341975664 |
| CTD-2544H17.1  | 0.008665394  | 0.991334606 | -1.982234926 | 0.233539753 |
| CTD-2561J22.5  | 0.00865216   | 0.99134784  | 0.703427848  | 1.629967388 |
| CTD-2562J17.6  | 0.008651909  | 0.991348091 | -1.821596374 | 0.274560318 |
| CTD-2566J3.1   | 0.008632419  | 0.991367581 | 1.840702314  | 3.584011242 |
| CTD-2623N2.3   | 0.008619276  | 0.991380724 | -1.332091151 | 0.387027236 |
| CTD-2626G11.2  | 0.008609888  | 0.991390112 | -0.833450336 | 0.276924554 |
| CTD-2653D5.1   | 0.008598378  | 0.991401622 | -1.207802341 | 0.428249902 |
| CTD-3014M21.1  | 0.0085961    | 0.9914039   | 0.658806851  | 1.578969469 |

|                |             |             |              |             |
|----------------|-------------|-------------|--------------|-------------|
| CTD-3051D23.1  | 0.00854429  | 0.99145571  | -2.602136746 | 0.134319089 |
| CTD-3193013.12 | 0.00853097  | 0.99146903  | -1.64172545  | 0.319747346 |
| CTD-3216D2.5   | 0.008526156 | 0.991473844 | -1.762738783 | 0.281993432 |
| CTD-3247F14.2  | 0.008464678 | 0.991535322 | 1.091848711  | 2.141871092 |
| CTD-3247H4.2   | 0.008447184 | 0.991552816 | -1.91628555  | 0.253393919 |
| CTDSP2         | 0.008435745 | 0.991564255 | -0.833576131 | 0.560185288 |
| CTNND1         | 0.008430311 | 0.991569689 | 0.827343593  | 1.776745568 |
| CTPS1          | 0.008386628 | 0.991613372 | -2.052354685 | 0.233369372 |
| CTSB           | 0.008360754 | 0.991639246 | -2.507060755 | 0.152646387 |
| CTSH           | 0.008359213 | 0.991640787 | -1.531106506 | 0.34559571  |
| CTSK           | 0.008355359 | 0.991644641 | -1.376489235 | 0.384296467 |
| CTSL           | 0.008335651 | 0.991664349 | -1.153534067 | 0.441928331 |
| CTSO           | 0.008329537 | 0.991670463 | -1.879549173 | 0.267351412 |
| CTTNBP2NL      | 0.008314769 | 0.991685231 | 1.063054092  | 2.091918704 |
| CUBN           | 0.008308062 | 0.991691938 | -1.753130873 | 0.286430086 |
| CUBNP3         | 0.008306227 | 0.991693773 | 0.862655721  | 1.821094091 |
| CUL4A          | 0.00829699  | 0.99170301  | 0.910119089  | 1.879251036 |
| CUTC           | 0.008274091 | 0.991725909 | 0.811926602  | 1.760573492 |
| CXCL14         | 0.00826577  | 0.99173423  | -0.927841998 | 0.525357539 |
| CXCL5          | 0.008264008 | 0.991735992 | -1.815447913 | 0.269751935 |
| CXCR4          | 0.0082518   | 0.9917482   | -1.290138538 | 0.407808827 |
| Cxorf23        | 0.008236795 | 0.991763205 | -1.239716167 | 0.414456614 |
| Cxorf38        | 0.008229219 | 0.991770781 | -2.140567481 | 0.225249048 |
| Cxorf57        | 0.00822277  | 0.99177723  | 0.949779991  | 1.935600313 |
| CYB561D1       | 0.008221643 | 0.991778357 | 0.928752146  | 1.903833958 |
| CYB561D2       | 0.008161729 | 0.991838271 | -1.513107083 | 0.337801625 |
| CYB5A          | 0.008157525 | 0.991842475 | 1.222153967  | 2.333711301 |
| CYBB           | 0.008149627 | 0.991850373 | -0.727172407 | 0.602808007 |
| CYBRD1         | 0.008128242 | 0.991871758 | -2.088891942 | 0.213993473 |
| CYC1           | 0.008125714 | 0.991874286 | 0.568521457  | 1.483379702 |
| CYCS           | 0.008121779 | 0.991878221 | 0.51938972   | 1.433434567 |
| CYCSP10        | 0.008121179 | 0.991878821 | 0.716645443  | 1.644351206 |
| CYP20A1        | 0.00811292  | 0.99188708  | -1.016126639 | 0.494165503 |
| CYP27B1        | 0.00810736  | 0.99189264  | -1.273304931 | 0.410700133 |
| CYP27C1        | 0.008080669 | 0.991919331 | -4.089436606 | 0.053257739 |
| CYP2A6         | 0.008078174 | 0.991921826 | -1.538193808 | 0.344243345 |
| CYP2B7P        | 0.008074772 | 0.991925228 | -1.29190827  | 0.4043117   |
| CYP2F2P        | 0.008064431 | 0.991935569 | -2.059828407 | 0.237387145 |
| CYP2R1         | 0.008030675 | 0.991969325 | -2.803647182 | 0.118015325 |
| CYP39A1        | 0.008019257 | 0.991980743 | -2.857713979 | 0.122055061 |
| CYP3A4         | 0.007993075 | 0.992006925 | -1.080035905 | 0.470558636 |
| CYP4A11        | 0.007969728 | 0.992030272 | 0.573918189  | 1.490178573 |
| CYP4B1         | 0.007963608 | 0.992036392 | 1.998208002  | 4.05991051  |
| CYP4F22        | 0.007945776 | 0.992054224 | 1.227413853  | 2.341954161 |
| CYP4F8         | 0.007938233 | 0.992061767 | 0.817934719  | 1.763789887 |
| CYP4V2         | 0.007923983 | 0.992076017 | 0.660493573  | 1.580783113 |
| CYP8B1         | 0.007916177 | 0.992083823 | -4.442547684 | 0.030628744 |
| CYTIP          | 0.007903693 | 0.992096307 | -1.329202278 | 0.394433477 |
| CYR1-AS1       | 0.007900837 | 0.992099163 | 0.988209485  | 1.984147779 |
| DAB2           | 0.007891992 | 0.992108008 | -1.439257233 | 0.366007421 |
| DANCR          | 0.007843863 | 0.992156137 | -0.871675004 | 0.544811805 |
| DAP3           | 0.007822896 | 0.992177104 | -1.027620667 | 0.490392722 |
| DAP3P1         | 0.007812242 | 0.992187758 | -1.848048996 | 0.255795972 |
| DAPK1          | 0.007807534 | 0.992192466 | 1.212596561  | 2.32153688  |
| DAPK1-IT1      | 0.007799833 | 0.992200167 | -1.535429623 | 0.343267207 |
| DAPL1          | 0.007767976 | 0.992232024 | -0.545899531 | 0.684016191 |
| DAZAP1         | 0.007767636 | 0.992232364 | 0.844035597  | 1.795640515 |
| DBF4           | 0.007717537 | 0.992282463 | 0.825290977  | 1.7721678   |
| DBF4B          | 0.007684637 | 0.992315363 | -0.905296985 | 0.531662732 |
| DBI            | 0.007684614 | 0.992315386 | 0.779489352  | 1.717307593 |
| DBNDD1         | 0.007663528 | 0.992336472 | 1.133729036  | 2.19553322  |
| DCAF13         | 0.007661374 | 0.992338626 | -1.78501688  | 0.288467708 |
| DCAF4          | 0.007640699 | 0.992359301 | 0.872341682  | 1.833046186 |
| DCBLD1         | 0.007624938 | 0.992375062 | 0.548667947  | 1.463088635 |
| DCD            | 0.007615893 | 0.992384107 | -1.635509472 | 0.317882637 |
| DCHS2          | 0.00761383  | 0.99238617  | 0.909745493  | 1.878986201 |
| DCLK2          | 0.007586017 | 0.992413983 | -2.235563174 | 0.204876657 |
| DCLRE1B        | 0.007582774 | 0.992417226 | -1.456535934 | 0.361505988 |
| DCTD           | 0.007578946 | 0.992421054 | -1.82179545  | 0.280450911 |
| DCTPP1         | 0.007567272 | 0.992432728 | 0.641062288  | 1.560306644 |
| DCUN1D2        | 0.007560138 | 0.992439862 | -3.8084941   | 0.05495504  |
| DCUN1D5        | 0.007535498 | 0.992464502 | -2.694437053 | 0.12286014  |
| DCX            | 0.007531951 | 0.992468049 | 0.73575973   | 1.67168049  |
| DCXR           | 0.007518911 | 0.992481089 | -0.753854585 | 0.592884284 |
| DDAH2          | 0.007504433 | 0.992495567 | 1.083636009  | 2.120651396 |
| DDB1           | 0.007443019 | 0.992556981 | 0.668238619  | 1.589745628 |
| DDIT4          | 0.007412862 | 0.992587138 | 0.761941162  | 1.695909662 |
| DDOST          | 0.007385763 | 0.992614237 | 0.68577399   | 1.612998653 |
| DDX10          | 0.007356274 | 0.992643726 | -1.547536474 | 0.33483061  |
| DDX11          | 0.007297262 | 0.992702738 | -1.946723082 | 0.254565261 |
| DDX12P         | 0.00726761  | 0.99273239  | -1.057932159 | 0.480102705 |
| DDX18          | 0.007253559 | 0.992746441 | 0.9447219    | 1.924999156 |
| DDX21          | 0.007235601 | 0.992764399 | -2.14303488  | 0.195605102 |
| DDX23          | 0.007206483 | 0.992793517 | 0.866695341  | 1.823855638 |
| DDX24          | 0.007187522 | 0.992812478 | 0.87436989   | 1.845723102 |
| DDX27          | 0.007183433 | 0.992816567 | 0.962797827  | 1.964066248 |
| DDX28          | 0.007168381 | 0.992831619 | -1.098550746 | 0.463236184 |
| DDX39A         | 0.007145888 | 0.992854112 | -0.845342081 | 0.553519399 |
| DDX3P1         | 0.007143689 | 0.992856311 | -2.318848684 | 0.175875617 |
| DDX41          | 0.007140279 | 0.992859721 | -0.682700204 | 0.622854645 |
| DDX46          | 0.007138471 | 0.992861529 | -1.384981913 | 0.378388931 |
| DDX47          | 0.007128075 | 0.992871925 | -1.114531434 | 0.459997043 |
| DDX49          | 0.007127425 | 0.992872575 | -1.937155251 | 0.260374305 |

|            |             |             |              |             |
|------------|-------------|-------------|--------------|-------------|
| DDX54      | 0.007102432 | 0.992897568 | -1.260998576 | 0.411083511 |
| DDX55      | 0.007066751 | 0.992933249 | -1.940915199 | 0.251627444 |
| DDX56      | 0.00704461  | 0.99295539  | -1.184607203 | 0.438465072 |
| DECR2      | 0.007043018 | 0.992956982 | -1.857793383 | 0.262352999 |
| DEFB109P1  | 0.007039774 | 0.992960226 | 1.62325313   | 3.092224285 |
| DEPCD1     | 0.006972505 | 0.993027495 | -1.088427398 | 0.467934604 |
| DEPCD1B    | 0.006962979 | 0.993037021 | -1.755975824 | 0.281505148 |
| DESI1      | 0.006959061 | 0.993040939 | 1.020092065  | 2.042021448 |
| DFFA       | 0.006950692 | 0.993049308 | -1.403343623 | 0.371439908 |
| DFFB       | 0.006924261 | 0.993075739 | 1.243891211  | 2.36853765  |
| DFNB59     | 0.006922534 | 0.993077466 | -1.264029009 | 0.412188556 |
| DGAT2      | 0.006916745 | 0.993083255 | -2.221309996 | 0.185706594 |
| DGKA       | 0.006916622 | 0.993083378 | 1.131868237  | 2.193248622 |
| DHFR       | 0.006894608 | 0.993105392 | -0.755229419 | 0.591987028 |
| DHFR11     | 0.006867678 | 0.993132322 | -1.424647256 | 0.359234259 |
| DHODH      | 0.006855719 | 0.993144281 | -2.09545429  | 0.222699729 |
| DHRS12     | 0.006812601 | 0.993187399 | -2.65091609  | 0.129085102 |
| DHRS2      | 0.006805488 | 0.993194512 | 2.524090594  | 5.924560857 |
| DHRS4      | 0.006800818 | 0.993199182 | 1.141586154  | 2.207022375 |
| DHRS4L2    | 0.006733944 | 0.993266056 | 1.045744753  | 2.065609848 |
| DHRS7B     | 0.006725897 | 0.993274103 | -1.097480472 | 0.464688685 |
| DHRSX      | 0.006707498 | 0.993292502 | -0.700094778 | 0.613310802 |
| DHTKD1     | 0.006704169 | 0.993295831 | 1.449534218  | 2.752174896 |
| DHX30      | 0.006691009 | 0.993308991 | 1.07120901   | 2.101794743 |
| DHX33      | 0.006625269 | 0.993374731 | -0.811259912 | 0.569730062 |
| DHX34      | 0.006604578 | 0.993395422 | -1.01864726  | 0.493410666 |
| DHX37      | 0.006590655 | 0.993409345 | -0.587071586 | 0.665570313 |
| DHX58      | 0.006581707 | 0.993418293 | -1.272173245 | 0.412167808 |
| DIAPH1     | 0.006568802 | 0.993431198 | -0.753039831 | 0.592364285 |
| DIEXF      | 0.00654595  | 0.99345405  | 1.595726358  | 3.025469284 |
| DIMT1      | 0.006535607 | 0.993464393 | 1.106149908  | 2.154891521 |
| DIP2C      | 0.006530434 | 0.993469566 | 1.049256867  | 2.069956215 |
| DIRAS1     | 0.006517465 | 0.993482535 | -2.050291428 | 0.240677861 |
| DIS3L      | 0.006502566 | 0.993497434 | -1.404844305 | 0.377647061 |
| DISP1      | 0.006493724 | 0.993506276 | -2.550383309 | 0.170272391 |
| DKC1       | 0.006488547 | 0.993511453 | -1.253976844 | 0.410650618 |
| DKK3       | 0.006468772 | 0.993531228 | 0.892237038  | 1.856636209 |
| DLAT       | 0.006455585 | 0.99354415  | 0.83692181   | 1.787248991 |
| DLG2       | 0.006453456 | 0.993546544 | -0.743887461 | 0.596617228 |
| DLG3       | 0.006432473 | 0.993567527 | 0.793381967  | 1.736073026 |
| DLGAP1-AS1 | 0.006430135 | 0.993569865 | -0.892573358 | 0.538032467 |
| DLGAP1-AS5 | 0.006425444 | 0.993574556 | -1.044165884 | 0.481107019 |
| DLGAP4-AS1 | 0.00641036  | 0.99358964  | 0.854790106  | 1.809482768 |
| DLGAP5     | 0.006405054 | 0.993594946 | -0.713099863 | 0.609689209 |
| DLL1       | 0.006397844 | 0.993602156 | 1.218169614  | 2.347071278 |
| DMD        | 0.006395283 | 0.993604717 | -0.721811537 | 0.604920999 |
| DMKN       | 0.006389645 | 0.993610355 | -0.584573019 | 0.666265121 |
| DNAAF5     | 0.006370104 | 0.993629896 | 0.56085946   | 1.475473462 |
| DNAH100S   | 0.006320146 | 0.993679854 | -2.731587011 | 0.123359334 |
| DNAH11     | 0.006301712 | 0.993698288 | 1.027729961  | 2.040916206 |
| DNAH5      | 0.00629086  | 0.99370914  | 1.997802917  | 3.994350579 |
| DNAJA3     | 0.006273083 | 0.993726917 | 0.95017726   | 1.93329298  |
| DNAJA4     | 0.006247364 | 0.993752636 | -2.727697319 | 0.129650184 |
| DNAJB12    | 0.006243169 | 0.993756831 | -2.503151475 | 0.175047509 |
| DNAJC11    | 0.006214895 | 0.993785105 | 0.831157874  | 1.779192109 |
| DNAJC12    | 0.006194069 | 0.993805931 | 1.796074027  | 3.474036012 |
| DNAJC2     | 0.006190499 | 0.993809501 | 0.857149855  | 1.812096891 |
| DNALI1     | 0.006184535 | 0.993815465 | 1.350031199  | 2.5703128   |
| DNH11      | 0.006180571 | 0.993819429 | 1.149155181  | 2.223599119 |
| DNM1       | 0.00615131  | 0.99384869  | 1.716475729  | 3.311694685 |
| DNM1P51    | 0.006127374 | 0.993872626 | 0.715841259  | 1.643179022 |
| DNMT1      | 0.006123158 | 0.993876842 | -1.666419423 | 0.304558681 |
| DNMT3B     | 0.006077064 | 0.993922936 | 0.596409924  | 1.512404559 |
| DNPEP      | 0.006056111 | 0.993943889 | -2.472669336 | 0.167396127 |
| DNPH1      | 0.006045646 | 0.993954354 | -3.9734563   | 0.042661388 |
| DNTTIP2    | 0.005993174 | 0.994006826 | -0.669333423 | 0.627853397 |
| DOCK11     | 0.005966647 | 0.994033353 | -1.753185511 | 0.282398667 |
| DOCK5      | 0.005962915 | 0.994037085 | 0.696791391  | 1.621718467 |
| DOCK8      | 0.005956339 | 0.994043661 | -2.842496971 | 0.133755592 |
| DOCK9      | 0.005940417 | 0.994059583 | -0.611257728 | 0.653552068 |
| DOCK9-AS1  | 0.005920699 | 0.994079301 | -2.064212671 | 0.237074163 |
| DPAGT1     | 0.005907078 | 0.994092922 | 0.796016953  | 1.73653721  |
| DPGD       | 0.005890315 | 0.994109685 | 0.886003321  | 1.856209462 |
| DPH2       | 0.005869382 | 0.994130618 | 0.684634101  | 1.608376869 |
| DPH5       | 0.005866098 | 0.994133902 | 0.614522055  | 1.531340298 |
| DPM2       | 0.005856334 | 0.994143666 | -1.137462252 | 0.45442703  |
| DPP3       | 0.005856239 | 0.994143761 | 1.100094092  | 2.147662647 |
| DPY19L1P2  | 0.005845365 | 0.994154635 | -1.616957915 | 0.319349707 |
| DPYSL2     | 0.005837964 | 0.994162036 | 1.117472064  | 2.179046004 |
| DQX1       | 0.00581074  | 0.99418926  | -1.318792066 | 0.400446658 |
| DRAXIN     | 0.005804919 | 0.994195081 | -1.528341489 | 0.346523983 |
| DRG1       | 0.005802937 | 0.994197063 | 0.564631055  | 1.47930075  |
| DRG2       | 0.005781667 | 0.994218333 | 0.701229266  | 1.626088929 |
| DSC1       | 0.005778798 | 0.994221202 | -0.890198429 | 0.539496019 |
| DSC2       | 0.005746868 | 0.994253132 | 0.840920005  | 1.793149627 |
| DSC3       | 0.005746622 | 0.994253378 | -2.579886533 | 0.137499779 |
| DSG1       | 0.005738837 | 0.994261163 | -0.717003337 | 0.60785128  |
| DSG3       | 0.005706896 | 0.994293104 | -1.884469523 | 0.263658831 |
| DSG4       | 0.005704912 | 0.994295088 | -2.953352707 | 0.127635298 |
| DSP        | 0.005697741 | 0.994302259 | -2.024852836 | 0.245008494 |
| DST        | 0.005685119 | 0.994314881 | -1.040527156 | 0.481954083 |
| DSTNP1     | 0.005657825 | 0.994342175 | 0.737936666  | 1.670580409 |
| DTD1       | 0.005647158 | 0.994352842 | -1.871095694 | 0.272961323 |

|           |             |             |              |             |
|-----------|-------------|-------------|--------------|-------------|
| DTD2      | 0.005636936 | 0.994363064 | 1.099462393  | 2.143057551 |
| DTL       | 0.005628978 | 0.994371022 | -1.33080454  | 0.39634542  |
| DTNA      | 0.00561225  | 0.99438775  | 2.24758151   | 5.022953476 |
| DTYMK     | 0.005607913 | 0.994392087 | -0.909753642 | 0.532158184 |
| DUOX1     | 0.005604386 | 0.994395614 | -0.767773783 | 0.586301503 |
| DUOX2     | 0.005581837 | 0.994418163 | -1.180620308 | 0.438749216 |
| DUOXA1    | 0.005578172 | 0.994421828 | 1.200364588  | 2.298425674 |
| DUS2      | 0.005575796 | 0.994424204 | -1.090618436 | 0.467664401 |
| DUS3L     | 0.005569621 | 0.994430379 | -0.780268013 | 0.58211117  |
| DUSP14    | 0.005560112 | 0.994439888 | 0.589644127  | 1.507109888 |
| DUSP18    | 0.005552512 | 0.994447488 | -0.757333691 | 0.589732872 |
| DUSP19    | 0.005550522 | 0.994449478 | -0.710145496 | 0.611054925 |
| DUSP22    | 0.005535016 | 0.994464984 | 0.797306193  | 1.744816533 |
| DUSP4     | 0.005519547 | 0.994480453 | -1.518157178 | 0.332559741 |
| DZANK1    | 0.005499777 | 0.994500223 | -2.437551927 | 0.154425802 |
| E2F4      | 0.00546052  | 0.99453948  | -3.346780697 | 0.095810877 |
| E2F7      | 0.005435033 | 0.994564967 | -1.761990003 | 0.277548718 |
| E2F8      | 0.005432116 | 0.994567884 | 0.684615518  | 1.607529138 |
| EARS2     | 0.005429341 | 0.994570659 | 1.02331622   | 2.033696983 |
| EBNA1BP2  | 0.005408865 | 0.994591135 | -0.892409635 | 0.538549495 |
| EBPL      | 0.005394946 | 0.994605054 | 0.704657937  | 1.631197168 |
| ECE2      | 0.005386938 | 0.994613062 | -0.5310925   | 0.691160562 |
| ECHDC3    | 0.005383828 | 0.994616172 | -1.336167726 | 0.395601575 |
| ECHS1     | 0.005373605 | 0.994626395 | -2.395929858 | 0.187884461 |
| EDAR      | 0.005361502 | 0.994638498 | -1.463160444 | 0.362503532 |
| EDIL3     | 0.005347805 | 0.994652195 | 1.336859261  | 2.568260651 |
| EEF1A1    | 0.005333856 | 0.994666144 | -1.763170401 | 0.284862854 |
| EEF1A1P11 | 0.005305979 | 0.994694021 | -3.8586823   | 0.067911201 |
| EEF1A1P13 | 0.005280885 | 0.994719115 | -2.36151078  | 0.168956352 |
| EEF1A1P16 | 0.005279648 | 0.994720352 | 0.521209868  | 1.436689648 |
| EEF1A1P19 | 0.005258535 | 0.994741465 | -1.598697441 | 0.316716894 |
| EEF1A1P30 | 0.005246118 | 0.994753882 | 1.680791844  | 3.255616614 |
| EEF1B2    | 0.005242385 | 0.994757615 | -1.951977477 | 0.258421219 |
| EEF1B2P3  | 0.00523793  | 0.99476207  | -1.485054548 | 0.353681132 |
| EEF1D     | 0.005222535 | 0.994777465 | 1.32205731   | 2.557504918 |
| EEF1DP3   | 0.005220077 | 0.994779923 | -1.477439749 | 0.344441565 |
| EEF1E1    | 0.0051539   | 0.9948461   | -1.727749636 | 0.301281289 |
| EEF2      | 0.005139964 | 0.994860036 | 1.160838165  | 2.237645251 |
| EFCAB13   | 0.005136023 | 0.994863977 | 0.771975295  | 1.708619239 |
| EFCAB6    | 0.005133068 | 0.994866932 | -1.900380986 | 0.244355418 |
| EFEMP1    | 0.00512092  | 0.99487908  | 1.101067598  | 2.171590948 |
| EFHC1     | 0.005114422 | 0.994885578 | 0.843999518  | 1.795522717 |
| EFHD2     | 0.005104027 | 0.994895973 | 1.454507899  | 2.785718306 |
| EFNA5     | 0.005094783 | 0.994905217 | -1.149600531 | 0.45061458  |
| EFNB2     | 0.005091523 | 0.994908477 | 0.686220908  | 1.609331362 |
| EFNB3     | 0.005081067 | 0.994918933 | 0.810154086  | 1.753613552 |
| EFR3B     | 0.005080453 | 0.994919547 | -1.266062174 | 0.413951248 |
| EFTUD2    | 0.005079442 | 0.994920558 | 0.731686176  | 1.661109741 |
| EGF       | 0.005061614 | 0.994938386 | 1.70381661   | 3.278402583 |
| EGFLAM    | 0.005056709 | 0.994943291 | 0.99854281   | 1.998447302 |
| EGFR      | 0.005051834 | 0.994948166 | -2.712457212 | 0.14120626  |
| EGFR-AS1  | 0.005037665 | 0.994962335 | -1.573668991 | 0.334661767 |
| EGR1      | 0.005021602 | 0.994978398 | -1.32203477  | 0.396868808 |
| EGR3      | 0.005020246 | 0.994979754 | 0.723701654  | 1.656114011 |
| EHD3      | 0.004984001 | 0.995015999 | 0.587971305  | 1.505087368 |
| EI24      | 0.00497998  | 0.99502002  | 0.539223237  | 1.453273371 |
| EIF1AX    | 0.00494665  | 0.99505335  | -1.928266352 | 0.259940443 |
| EIF1B-AS1 | 0.004943971 | 0.995056029 | -3.161387286 | 0.079824477 |
| EIF2B1    | 0.004942244 | 0.995057756 | -1.9109661   | 0.256759134 |
| EIF2B3    | 0.004938881 | 0.995061119 | 1.478703555  | 2.794677172 |
| EIF2B5    | 0.004932529 | 0.995067471 | 1.156081323  | 2.228687547 |
| EIF2D     | 0.004931155 | 0.995068845 | -0.994398239 | 0.501816459 |
| EIF2S1    | 0.004906231 | 0.995093769 | -1.279222774 | 0.411110676 |
| EIF2S2    | 0.004905279 | 0.995094721 | -1.135232036 | 0.452425122 |
| EIF2S3    | 0.004902173 | 0.995097827 | 1.646110824  | 3.200641238 |
| EIF2S3L   | 0.00489327  | 0.99510673  | 0.93386342   | 1.910718585 |
| EIF3A     | 0.00489029  | 0.99510971  | 0.621604873  | 1.539149691 |
| EIF3B     | 0.00488552  | 0.99511448  | -1.368043954 | 0.387247464 |
| EIF3C     | 0.004884213 | 0.995115787 | 0.80793005   | 1.750919043 |
| EIF3D     | 0.004871838 | 0.995128162 | 1.047209249  | 2.067300294 |
| EIF3E     | 0.004866721 | 0.995133279 | -1.844298389 | 0.278380605 |
| EIF3EP1   | 0.004835828 | 0.995164172 | -1.768135041 | 0.291952827 |
| EIF3F     | 0.004830306 | 0.995169694 | -1.836825417 | 0.266286604 |
| EIF3H     | 0.00482592  | 0.99517408  | 0.552758867  | 1.467755374 |
| EIF3I     | 0.004823281 | 0.995176719 | -1.405427121 | 0.371998551 |
| EIF3K     | 0.00481152  | 0.99518848  | 0.530615772  | 1.445059076 |
| EIF3L     | 0.004809884 | 0.995190116 | -0.941808135 | 0.520361744 |
| EIF3M     | 0.004801399 | 0.995198601 | -2.45754934  | 0.146519362 |
| EIF4A3    | 0.004778238 | 0.995221762 | 1.147755421  | 2.216974673 |
| EIF4B     | 0.00477464  | 0.99522536  | 0.999448051  | 2.008785815 |
| EIF4BP2   | 0.00474426  | 0.99525574  | 0.962085595  | 1.948924117 |
| EIF4BP3   | 0.004743707 | 0.995256293 | -1.149618739 | 0.448882061 |
| EIF4BP6   | 0.004742815 | 0.995257185 | -2.57356184  | 0.165334519 |
| EIF4E     | 0.004738312 | 0.995261688 | 1.350529792  | 2.601056421 |
| EIF4E3    | 0.004718449 | 0.995281551 | 1.476912354  | 2.873147064 |
| EIF4EBP1  | 0.004718329 | 0.995281671 | -2.030102833 | 0.24232061  |
| EIF4EP2   | 0.004701546 | 0.995298454 | 0.9136272    | 1.885402535 |
| EIF4G1    | 0.004679853 | 0.995320147 | -2.14387718  | 0.221474419 |
| EIF4H     | 0.004651301 | 0.995348699 | -3.166410568 | 0.076792849 |
| EIF5A     | 0.004633295 | 0.995366705 | -2.385368206 | 0.161797249 |
| EIF5B     | 0.004609485 | 0.995390515 | -1.013816301 | 0.494266397 |
| EIF6      | 0.004584342 | 0.995415658 | -0.973577563 | 0.509142594 |
| ELAC2     | 0.00457093  | 0.99542907  | 0.894059715  | 1.85888016  |

|              |             |             |              |             |
|--------------|-------------|-------------|--------------|-------------|
| ELMO2        | 0.004556775 | 0.995443225 | 0.972578077  | 1.962744867 |
| ELOF1        | 0.00455489  | 0.99544511  | -0.835447453 | 0.559855281 |
| ELOVL3       | 0.004553929 | 0.995446071 | 0.63284635   | 1.550905884 |
| ELOVL4       | 0.004549455 | 0.995450545 | 1.12550333   | 2.190160951 |
| ELOVL6       | 0.004517774 | 0.995482226 | -2.562507391 | 0.151045241 |
| ELOVL7       | 0.004484387 | 0.995515613 | -1.019880366 | 0.492070699 |
| ELP3         | 0.004459667 | 0.995540333 | -0.976081763 | 0.503077748 |
| ELP6         | 0.004452121 | 0.995547879 | -1.485360771 | 0.355276771 |
| EMC3-AS1     | 0.004437802 | 0.995562198 | 0.5881713    | 1.503452476 |
| EMC8         | 0.004415564 | 0.995584436 | -2.06140662  | 0.236416168 |
| EMD          | 0.004391025 | 0.995608975 | -3.478194958 | 0.086038599 |
| EME1         | 0.004383699 | 0.995616301 | 0.910150397  | 1.880581032 |
| EME2         | 0.00437984  | 0.99562016  | -2.985750068 | 0.109933544 |
| EMP2         | 0.004374026 | 0.995625974 | 0.913733942  | 1.888983407 |
| EMX2OS       | 0.004347178 | 0.995652822 | -0.789124005 | 0.576062353 |
| EN1          | 0.004344912 | 0.995655088 | 1.05687197   | 2.085602968 |
| ENC1         | 0.00432207  | 0.99567793  | 0.973147567  | 1.964071318 |
| ENDOD1       | 0.00430427  | 0.99569573  | 1.102698197  | 2.148906982 |
| ENDOV        | 0.004303273 | 0.995696727 | -2.320334597 | 0.200089305 |
| ENO1         | 0.004295963 | 0.995704037 | 0.924898663  | 1.899011697 |
| ENO1-IT1     | 0.004295006 | 0.995704994 | 0.594729132  | 1.511202024 |
| ENO1P3       | 0.004289372 | 0.995710628 | -0.787630785 | 0.579158333 |
| ENOSF1       | 0.00428595  | 0.99571405  | -1.588004125 | 0.323223714 |
| ENPP2        | 0.004267122 | 0.995732878 | -0.804607021 | 0.572112222 |
| ENTPD1       | 0.004241349 | 0.995758651 | -2.977044854 | 0.096117519 |
| EPAS1        | 0.004237771 | 0.995762229 | 0.936434882  | 1.919784913 |
| EPB41        | 0.004235558 | 0.995764442 | 0.993640723  | 2.000055474 |
| EPB41L2      | 0.004227827 | 0.995772173 | -1.167393734 | 0.439331984 |
| EPB41L3      | 0.004211548 | 0.995788452 | -1.595559937 | 0.330849166 |
| EPB41L4A     | 0.004207177 | 0.995792823 | 1.17446547   | 2.263699361 |
| EPB41L4A-AS1 | 0.004204941 | 0.995795059 | 1.285737724  | 2.460931033 |
| EPB41L4B     | 0.004201401 | 0.995798599 | 1.361106873  | 2.569325577 |
| EPB41L5      | 0.00419366  | 0.99580634  | -2.05182206  | 0.227281608 |
| EPHA4        | 0.004172837 | 0.995827163 | 0.765149701  | 1.700570356 |
| EPHA5        | 0.004171689 | 0.995828311 | -1.643732298 | 0.305404273 |
| EPHB1        | 0.004120491 | 0.995879509 | -1.465776846 | 0.358782503 |
| EPHX4        | 0.004111383 | 0.995888617 | 0.796109053  | 1.736790077 |
| EPPK1        | 0.004110742 | 0.995889258 | 0.792388369  | 1.732381605 |
| EPRS         | 0.004108174 | 0.995891826 | -1.457454162 | 0.352942673 |
| EPS8L1       | 0.004097348 | 0.995902652 | -0.972323282 | 0.509449849 |
| EPT1         | 0.004093028 | 0.995906972 | -1.035283556 | 0.486099501 |
| EQTN         | 0.004060049 | 0.995939951 | 0.561809945  | 1.476928017 |
| ERAL1        | 0.004031259 | 0.995968741 | -1.441703369 | 0.365085677 |
| ERAP1        | 0.004023772 | 0.995976228 | -0.703472595 | 0.614027186 |
| ERBB4        | 0.004001377 | 0.995998623 | 2.607394081  | 7.48747531  |
| ERC2         | 0.00398269  | 0.99601731  | 0.515756675  | 1.430082631 |
| ERCC5        | 0.003980728 | 0.996019272 | -1.834269037 | 0.28016179  |
| ERG          | 0.003977965 | 0.996022035 | -1.048021128 | 0.477615183 |
| ERH          | 0.003976479 | 0.996023521 | 0.951971985  | 1.934726292 |
| ERI3         | 0.003963848 | 0.996036152 | -1.318871508 | 0.394560548 |
| ERMN         | 0.003927514 | 0.996072486 | -1.721472608 | 0.30175465  |
| ERP27        | 0.003926517 | 0.996073483 | -1.361280999 | 0.388578358 |
| ERP29        | 0.003924335 | 0.996075665 | -1.877345223 | 0.265043446 |
| ERV3-1       | 0.003915268 | 0.996084732 | 1.295123756  | 2.463749584 |
| ERVMER34-1   | 0.003908143 | 0.996091857 | 1.032777415  | 2.046175171 |
| ESPL1        | 0.003902645 | 0.996097355 | 1.015549631  | 2.021915625 |
| ESRP2        | 0.003899014 | 0.996100986 | 1.203092224  | 2.303809478 |
| ESRRG        | 0.003898058 | 0.996101942 | 1.029786552  | 2.04537717  |
| ETFA         | 0.00389606  | 0.99610394  | 0.730520123  | 1.659561402 |
| ETFB         | 0.003894086 | 0.996105914 | -3.08492508  | 0.087480266 |
| ETNK2        | 0.003884339 | 0.996115661 | -0.782680902 | 0.580992189 |
| ETNPPL       | 0.003882511 | 0.996117489 | -2.925134377 | 0.116392609 |
| ETS2         | 0.00386092  | 0.99613908  | -0.97791728  | 0.504134055 |
| ETV3         | 0.003859227 | 0.996140773 | -1.223401337 | 0.427722318 |
| ETV3L        | 0.00382542  | 0.99617458  | 0.543071639  | 1.457834094 |
| ETV6         | 0.003816805 | 0.996183195 | -3.366987763 | 0.079112416 |
| EVA1A        | 0.003815779 | 0.996184221 | 0.997936615  | 1.999077868 |
| EVA1C        | 0.003811638 | 0.996188362 | 1.442477162  | 2.741248303 |
| EVC2         | 0.003807863 | 0.996192137 | 1.257018268  | 2.393996215 |
| EX01         | 0.003807212 | 0.996192788 | -1.522483863 | 0.33892007  |
| EXOC6B       | 0.003790233 | 0.996209767 | -0.947781165 | 0.518081996 |
| EXOSC2       | 0.003789474 | 0.996210526 | 1.3021215    | 2.502332421 |
| EXOSC3P1     | 0.003784251 | 0.996215749 | 1.621671317  | 3.10336421  |
| EXOSC4       | 0.003780361 | 0.996219639 | 0.526637781  | 1.441165404 |
| EXOSC5       | 0.003771017 | 0.996228983 | -3.874377708 | 0.064984045 |
| EXOSC7       | 0.003769079 | 0.996230921 | -0.880724287 | 0.539663819 |
| EXT1         | 0.003762425 | 0.996237575 | -2.008100071 | 0.24028721  |
| EYA2         | 0.003745175 | 0.996254825 | -2.347920529 | 0.17666917  |
| F12          | 0.003744524 | 0.996255476 | -1.001302094 | 0.496262887 |
| F13A1        | 0.00372645  | 0.99627355  | 0.982940583  | 1.976706775 |
| F2RL1        | 0.003726115 | 0.996273885 | -1.328097919 | 0.395117446 |
| FAZH         | 0.003703156 | 0.996296844 | -1.117112493 | 0.459015784 |
| FABP4        | 0.00370277  | 0.99629723  | 0.655653089  | 1.577095142 |
| FABP5        | 0.00369552  | 0.99630448  | 0.757287787  | 1.695296301 |
| FABP6        | 0.003685296 | 0.996314704 | -1.849741311 | 0.261167506 |
| FABP7        | 0.003679855 | 0.996320145 | -1.354079603 | 0.390725057 |
| FAH          | 0.003676555 | 0.996323445 | 1.143702142  | 2.210386128 |
| FAHD2B       | 0.003675346 | 0.996324654 | 1.80172371   | 3.549692482 |
| FAM101B      | 0.003671311 | 0.996328689 | -1.609657247 | 0.313842479 |
| FAM105A      | 0.003669476 | 0.996330524 | 3.464600192  | 16.24205766 |
| FAM114A1     | 0.003656544 | 0.996343456 | -0.752299118 | 0.591550721 |
| FAM120B      | 0.003652449 | 0.996347551 | -1.873086444 | 0.265590498 |
| FAM120C      | 0.003617547 | 0.996382453 | -1.168004165 | 0.446933326 |



|          |             |             |              |             |
|----------|-------------|-------------|--------------|-------------|
| FAM124B  | 0.003591742 | 0.996408258 | 1.232186226  | 2.349915248 |
| FAM133CP | 0.003590594 | 0.996409406 | -1.015574785 | 0.491168252 |
| FAM134B  | 0.003589695 | 0.996410305 | 1.328663919  | 2.512274611 |
| FAM136A  | 0.003584383 | 0.996415617 | 0.605433826  | 1.521924251 |
| FAM13C   | 0.003578387 | 0.996421613 | 0.840148227  | 1.791202827 |
| FAM150B  | 0.003562886 | 0.996437114 | -0.901736183 | 0.534657452 |
| FAM157C  | 0.003562878 | 0.996437122 | -2.050690222 | 0.240348348 |
| FAM161B  | 0.003556715 | 0.996443285 | -0.621265487 | 0.64951357  |
| FAM162A  | 0.003553929 | 0.996446071 | -2.367983446 | 0.164804896 |
| FAM168A  | 0.003539881 | 0.996460119 | -2.975722945 | 0.12693952  |
| FAM180A  | 0.00353809  | 0.99646191  | -2.819139334 | 0.121441809 |
| FAM182B  | 0.003534856 | 0.996465144 | 1.019863699  | 2.03281787  |
| FAM184A  | 0.003533043 | 0.996466957 | -0.800260646 | 0.573655573 |
| FAM186A  | 0.003532133 | 0.996467867 | 0.713607257  | 1.639915629 |
| FAM189A2 | 0.00351895  | 0.99648105  | 0.769549694  | 1.705262354 |
| FAM189B  | 0.003512138 | 0.996487862 | 0.829414723  | 1.782302681 |
| FAM198A  | 0.003508156 | 0.996491844 | -1.087486408 | 0.464300545 |
| FAM198B  | 0.003498622 | 0.996501378 | 1.208409026  | 2.318760853 |
| FAM204CP | 0.003488104 | 0.996511896 | 1.060180754  | 2.085495963 |
| FAM207A  | 0.003466148 | 0.996533852 | -2.055009792 | 0.224932093 |
| FAM20A   | 0.003454827 | 0.996545173 | -1.03633593  | 0.484541805 |
| FAM210A  | 0.003415322 | 0.996584678 | 0.774390689  | 1.712593958 |
| FAM213B  | 0.003407355 | 0.996592645 | 0.922337546  | 1.895613585 |
| FAM216A  | 0.003392041 | 0.996607959 | -0.737084627 | 0.5996213   |
| FAM218A  | 0.00339192  | 0.99660808  | 0.69874729   | 1.623131011 |
| FAM222A  | 0.003387058 | 0.996612942 | -3.458284557 | 0.083980102 |
| FAM228B  | 0.003384059 | 0.996615941 | 1.458870396  | 2.762649057 |
| FAM26E   | 0.003382434 | 0.996617566 | -1.343994979 | 0.393549119 |
| FAM32A   | 0.003375899 | 0.996624101 | -1.196811598 | 0.43029932  |
| FAM3D    | 0.003350931 | 0.996649069 | -4.121023244 | 0.052553003 |
| FAM49A   | 0.003348922 | 0.996651078 | 1.563035155  | 3.010748728 |
| FAM50A   | 0.003345438 | 0.996654562 | -1.36856408  | 0.384606522 |
| FAM57A   | 0.003333188 | 0.996666812 | 0.881673896  | 1.842721178 |
| FAM66A   | 0.003330247 | 0.996669753 | -2.126174806 | 0.227395008 |
| FAM66C   | 0.003321848 | 0.996678152 | -0.912141845 | 0.528357844 |
| FAM72B   | 0.003307465 | 0.996692535 | -2.738941295 | 0.141372789 |
| FAM83A   | 0.003279868 | 0.996720132 | 0.956316768  | 1.944914354 |
| FAM83D   | 0.003274124 | 0.996725876 | -1.65420603  | 0.309368819 |
| FAM84A   | 0.003267885 | 0.996732115 | -3.413252484 | 0.080695283 |
| FAM86B3P | 0.003266102 | 0.996733898 | -1.963109458 | 0.250230134 |
| FAM86C2P | 0.00325123  | 0.99674877  | -0.978042476 | 0.50720137  |
| FAM86DP  | 0.003249954 | 0.996750046 | -1.149432967 | 0.450737509 |
| FAM86EP  | 0.003243189 | 0.996756811 | -2.534940529 | 0.16173912  |
| FAM89A   | 0.003237929 | 0.996762071 | -0.71398462  | 0.609152534 |
| FAM95C   | 0.003227811 | 0.996772189 | -1.526239212 | 0.338645674 |
| FAM96A   | 0.003223942 | 0.996776058 | -2.109140383 | 0.228504587 |
| FAM96B   | 0.003223875 | 0.996776125 | 0.5908407    | 1.507700713 |
| FAM98A   | 0.003212704 | 0.996787296 | 1.430994552  | 2.708850128 |
| FANCA    | 0.003204332 | 0.996795668 | 0.776159222  | 1.713021193 |
| FANCB    | 0.003190799 | 0.996809201 | -1.537750161 | 0.344081211 |
| FANCC    | 0.003188433 | 0.996811567 | 0.922007231  | 1.898074158 |
| FANCD2   | 0.003182295 | 0.996817705 | 0.709880926  | 1.636335259 |
| FANCE    | 0.00318124  | 0.99681876  | -1.266178621 | 0.407043357 |
| FANCG    | 0.00316664  | 0.99683336  | 0.873664109  | 1.833247009 |
| FAR2     | 0.003157538 | 0.996842462 | 1.606505069  | 3.047865541 |
| FAR2P1   | 0.003156463 | 0.996843537 | -0.552954614 | 0.681559502 |
| FARP1    | 0.003145429 | 0.996854571 | -1.023992208 | 0.491681504 |
| FARP2    | 0.003137421 | 0.996862579 | -4.058648872 | 0.047393709 |
| FARSA    | 0.003128045 | 0.996871955 | -1.028481175 | 0.488889842 |
| FARSB    | 0.003078705 | 0.996921295 | -1.929797253 | 0.25506608  |
| FASN     | 0.003075129 | 0.996924871 | 0.72616736   | 1.659200446 |
| FASTKD2  | 0.003067969 | 0.996932031 | -0.64280055  | 0.640369724 |
| FASTKD3  | 0.003050195 | 0.996949805 | -0.742147074 | 0.59775444  |
| FASTKD5  | 0.003043396 | 0.996956604 | 1.409725416  | 2.746657392 |
| FAT1     | 0.003018955 | 0.996981045 | -3.237317782 | 0.06480647  |
| FAT2     | 0.003005544 | 0.996994456 | 0.555619749  | 1.471214466 |
| FAT3     | 0.002984967 | 0.997015033 | 1.571762378  | 3.038147571 |
| FATE1    | 0.002979134 | 0.997020866 | 0.813315728  | 1.758912203 |
| FAU      | 0.002970376 | 0.997029624 | 1.169138468  | 2.276830435 |
| FBL      | 0.002962189 | 0.997037811 | -0.994438971 | 0.501700173 |
| FBLN1    | 0.002954421 | 0.997045579 | -1.155130754 | 0.444708183 |
| FBXL14   | 0.00295298  | 0.99704702  | 0.885422481  | 1.847452939 |
| FBXL20   | 0.00294777  | 0.99705223  | -2.013888154 | 0.244776213 |
| FBXO31   | 0.00294725  | 0.99705275  | -1.38478162  | 0.38268361  |
| FBXO32   | 0.002947041 | 0.997052959 | 1.591469795  | 3.020307262 |
| FBXO4    | 0.002928219 | 0.997071781 | -0.612160112 | 0.65392273  |
| FBXO41   | 0.002920817 | 0.997079183 | -0.964507995 | 0.512440837 |
| FBXW9    | 0.002917818 | 0.997082182 | 0.520859259  | 1.436116717 |
| FCF1P8   | 0.002900121 | 0.997099879 | -1.189974264 | 0.43322227  |
| FCGR2A   | 0.002897955 | 0.997102045 | 0.905011126  | 1.875358995 |
| DFDT1    | 0.002894674 | 0.997105326 | -3.509205508 | 0.070093843 |
| FDPS     | 0.002886438 | 0.997113562 | -1.156876819 | 0.44682962  |
| FDXR     | 0.002886091 | 0.997113909 | -1.266810894 | 0.407709819 |
| FECH     | 0.002880886 | 0.997119114 | -0.821149903 | 0.564325251 |
| FEN1     | 0.002879589 | 0.997120411 | -1.195564669 | 0.436561706 |
| FER      | 0.002877532 | 0.997122468 | 1.083062916  | 2.119389555 |
| FERMT1   | 0.002877295 | 0.997122705 | 0.67574918   | 1.597923779 |
| FERMT2   | 0.002875648 | 0.997124352 | -4.053102915 | 0.050276345 |
| FEZ1     | 0.002874193 | 0.997125807 | -2.180801929 | 0.206782896 |
| FFAR4    | 0.002872933 | 0.997127067 | 0.840282916  | 1.790767121 |
| FGD5     | 0.002868486 | 0.997131514 | -1.217750607 | 0.424622643 |
| FGF1     | 0.002865603 | 0.997134397 | -2.210126521 | 0.194844631 |
| FGF11    | 0.002860067 | 0.997139933 | -1.241549038 | 0.422717506 |

|            |             |             |              |             |
|------------|-------------|-------------|--------------|-------------|
| FGF13      | 0.002850473 | 0.997149527 | 1.221930767  | 2.337738471 |
| FGF7       | 0.002848367 | 0.997151633 | -1.033584551 | 0.486287923 |
| FGFR1      | 0.002840915 | 0.997159085 | 1.238045116  | 2.363713685 |
| FGFR2      | 0.002830927 | 0.997169073 | 1.012047173  | 2.020260106 |
| FGFR3      | 0.002827282 | 0.997172718 | 0.633300547  | 1.552234597 |
| GLG2       | 0.00282041  | 0.99717959  | -0.974443586 | 0.508823547 |
| FH         | 0.00280033  | 0.99719967  | -1.35233896  | 0.389085081 |
| FHDC1      | 0.002795531 | 0.997204469 | 0.532146997  | 1.446953115 |
| FHL2       | 0.002792492 | 0.997207508 | 0.933474196  | 1.918411785 |
| FHOD3      | 0.002791486 | 0.997208514 | -1.625073175 | 0.316605609 |
| FIBIN      | 0.002787651 | 0.997212349 | 0.618949868  | 1.53600468  |
| FIBP       | 0.002781253 | 0.997218747 | -2.525178614 | 0.164213612 |
| FIRRE      | 0.002778195 | 0.997221805 | 0.951250941  | 1.933779986 |
| FIX1       | 0.002775637 | 0.997224363 | -0.568910913 | 0.673981752 |
| FKBP10     | 0.002773091 | 0.997226909 | -2.251478715 | 0.209679231 |
| FKBP1A     | 0.002759316 | 0.997240684 | -0.981145488 | 0.505480447 |
| FKBP4      | 0.002758054 | 0.997241946 | -2.067226593 | 0.233643506 |
| FKBP9      | 0.002746148 | 0.997253852 | 2.659168798  | 7.635516345 |
| FLAD1      | 0.002742512 | 0.997257488 | 1.674543973  | 3.23207791  |
| FLG        | 0.002737155 | 0.997262845 | 1.313773959  | 2.488740184 |
| FLG2       | 0.002731445 | 0.997268555 | 1.517960784  | 2.908709937 |
| FLG-AS1    | 0.002726349 | 0.997273651 | -1.212577518 | 0.430734581 |
| FLJ1       | 0.002717782 | 0.997282218 | -2.041033843 | 0.233436009 |
| FLJ31662   | 0.002698986 | 0.997301014 | -1.300114719 | 0.404122734 |
| FLNB-AS1   | 0.002686662 | 0.997313338 | -2.294649699 | 0.178323721 |
| FLRT2      | 0.002683274 | 0.997316726 | 0.933066136  | 1.909482814 |
| FLRT3      | 0.00268087  | 0.99731913  | 0.663127458  | 1.584213978 |
| FMN1       | 0.002680468 | 0.997319532 | 0.942105434  | 1.922332335 |
| FMNL3      | 0.0026737   | 0.9973263   | 1.620061716  | 3.073984025 |
| FMO2       | 0.002671446 | 0.997328554 | -1.274462083 | 0.413365587 |
| FMO3       | 0.002639922 | 0.997360078 | -1.024970187 | 0.491361334 |
| FMO4       | 0.002639065 | 0.997360935 | -1.538118345 | 0.34364656  |
| FMO5       | 0.002638571 | 0.997361429 | 1.785020498  | 3.461759679 |
| FMO6P      | 0.002630368 | 0.997369632 | -1.299509111 | 0.396956252 |
| FMOD       | 0.002629633 | 0.997370367 | -1.237605476 | 0.423933406 |
| FNBP1      | 0.002627651 | 0.997372349 | -1.231712831 | 0.424025669 |
| FNDC1      | 0.002608688 | 0.997391312 | -0.854716544 | 0.551381071 |
| FNDC4      | 0.002605127 | 0.997394873 | 1.488150738  | 2.807850106 |
| FOS        | 0.002603314 | 0.997396686 | -2.092325513 | 0.213460831 |
| FOX1       | 0.002600321 | 0.997399679 | 0.973279759  | 1.965057951 |
| FOX1CUT    | 0.002600159 | 0.997399841 | -2.942579231 | 0.116472544 |
| FOXJ2      | 0.002595089 | 0.997404911 | -2.708110406 | 0.152866041 |
| FOX1M1     | 0.002587004 | 0.997412996 | -0.709708506 | 0.611392021 |
| FOXN3      | 0.002582827 | 0.997417173 | -1.803057027 | 0.277069061 |
| FOXO1      | 0.002576396 | 0.997423604 | 2.489729272  | 5.653395614 |
| FOX1P1     | 0.002556099 | 0.997443901 | 1.144828397  | 2.214058542 |
| FOX1P1-AS1 | 0.002548021 | 0.997451979 | -1.118653602 | 0.460485302 |
| FOX1P1-IT1 | 0.00253773  | 0.99746227  | 1.062734575  | 2.090121877 |
| FOXQ1      | 0.002537195 | 0.997462805 | -0.522702611 | 0.695535336 |
| FOXRED1    | 0.002536567 | 0.997463433 | -1.378959041 | 0.378348106 |
| FRAT2      | 0.002535103 | 0.997464897 | 0.638649054  | 1.557202904 |
| FRMD3      | 0.002534185 | 0.997465815 | 1.348530628  | 2.54741059  |
| FRMD4A     | 0.002529871 | 0.997470129 | 0.829439672  | 1.780157243 |
| FRMD6-AS2  | 0.002526599 | 0.997473401 | 0.851609962  | 1.804812167 |
| FRY        | 0.002504663 | 0.997495337 | 1.250547072  | 2.388873615 |
| FRZB       | 0.002502834 | 0.997497166 | -1.647060363 | 0.318171969 |
| FSIP2      | 0.002496534 | 0.997503466 | -1.590210042 | 0.330956872 |
| FSIP2-AS1  | 0.002496081 | 0.997503919 | -0.959402543 | 0.511392216 |
| FST        | 0.002494221 | 0.997505779 | 1.152432481  | 2.223497558 |
| FTCDNL1    | 0.002494093 | 0.997505907 | -3.153079169 | 0.106669851 |
| FTH1       | 0.002481747 | 0.997518253 | -2.401132611 | 0.164923016 |
| FTL        | 0.002481684 | 0.997518316 | 1.62621457   | 3.144497474 |
| FTLP6      | 0.00247945  | 0.99752055  | -2.633033893 | 0.153088182 |
| FTSJ2      | 0.00247698  | 0.99752302  | -2.325138055 | 0.168514784 |
| FTSJ3      | 0.002466239 | 0.997533761 | 1.300758785  | 2.503968422 |
| FTX        | 0.002457086 | 0.997542914 | 1.355109711  | 2.558558095 |
| FXN        | 0.002431492 | 0.997568508 | -2.421288319 | 0.18037751  |
| FXR2       | 0.002427566 | 0.997572434 | -1.444237898 | 0.364949958 |
| FXYD2      | 0.002420717 | 0.997579283 | 0.657103923  | 1.580661538 |
| FXYD5      | 0.002413739 | 0.997586261 | 0.726289701  | 1.655271037 |
| FXYD6      | 0.002408879 | 0.997591121 | -1.465886673 | 0.352932446 |
| FYB        | 0.00239427  | 0.99760573  | 0.993394     | 1.994398868 |
| FZD1       | 0.002392104 | 0.997607896 | 1.432771807  | 2.700827618 |
| FZD4       | 0.002391473 | 0.997608527 | -1.060500872 | 0.476075226 |
| FZD7       | 0.002391058 | 0.997608942 | -1.573429938 | 0.335254173 |
| GAB1       | 0.002388334 | 0.997611666 | -2.359003387 | 0.183132559 |
| GAB2       | 0.002368778 | 0.997631222 | 1.229973989  | 2.34601925  |
| GABARAPL1  | 0.00236822  | 0.99763178  | -2.064532179 | 0.238614062 |
| GABBR1     | 0.002351008 | 0.997648992 | -0.626101272 | 0.647848363 |
| GABPB2     | 0.002348525 | 0.997651475 | 1.077866498  | 2.135033483 |
| GABRP      | 0.002341949 | 0.997658051 | -1.113421905 | 0.458036697 |
| GABRR1     | 0.002336015 | 0.997663985 | 0.842480415  | 1.794143534 |
| GAD1       | 0.002327006 | 0.997672994 | 0.995580702  | 2.01546344  |
| GADD45GIP1 | 0.002315392 | 0.997684608 | -3.425631506 | 0.057895388 |
| GAL3S14    | 0.002307327 | 0.997692673 | -1.977375827 | 0.249681765 |
| GALE       | 0.0023034   | 0.9976966   | -1.424792147 | 0.364310862 |
| GALM       | 0.002285754 | 0.997714246 | -2.601739235 | 0.158589776 |
| GALNT10    | 0.002278734 | 0.997721266 | 1.016426688  | 2.023724623 |
| GALNT14    | 0.002277517 | 0.997722483 | -0.80449638  | 0.572445218 |
| GALNT18    | 0.002274217 | 0.997725783 | -2.598714416 | 0.124462649 |
| GALNT6     | 0.002263501 | 0.997736499 | 0.641074572  | 1.560243993 |
| GAN        | 0.002251769 | 0.997748231 | 0.790331008  | 1.732609046 |
| GANC       | 0.002232384 | 0.997767616 | 0.944518738  | 1.925127614 |

|           |             |             |              |             |
|-----------|-------------|-------------|--------------|-------------|
| GAPDH     | 0.002223407 | 0.997776593 | 0.776215887  | 1.7160817   |
| GAPDHP1   | 0.00222098  | 0.99777902  | 0.53426554   | 1.448880728 |
| GAPDHP25  | 0.002215098 | 0.997784902 | 1.630612433  | 3.098243798 |
| GAR1      | 0.002213358 | 0.997786642 | 1.188075037  | 2.278734804 |
| GARS      | 0.00220905  | 0.99779095  | 0.744123763  | 1.675135949 |
| GART      | 0.00220703  | 0.99779297  | 1.006488355  | 2.009876742 |
| GAS1      | 0.0022053   | 0.9977947   | 1.329916945  | 2.519235263 |
| GAS5      | 0.002200785 | 0.997799215 | -1.152301496 | 0.449600322 |
| GAS8      | 0.002198374 | 0.997801626 | -1.001952532 | 0.499096716 |
| GATA3     | 0.002195758 | 0.997804242 | 1.120154131  | 2.17391546  |
| GATA6     | 0.002191507 | 0.997808493 | 0.847339737  | 1.79938269  |
| GATB      | 0.002184005 | 0.997815995 | -1.202496264 | 0.432380068 |
| GATS      | 0.002180282 | 0.997819718 | 1.252550278  | 2.383315407 |
| GBE1      | 0.002175183 | 0.997824817 | -3.729930891 | 0.074848203 |
| GBP3      | 0.002166674 | 0.997833326 | 0.827281348  | 1.774505388 |
| GBP4      | 0.002166634 | 0.997833366 | -1.099249332 | 0.466183406 |
| GCAT      | 0.002166357 | 0.997833643 | 1.269465742  | 2.417139706 |
| GCDH      | 0.002161907 | 0.997838093 | -0.525543859 | 0.694553485 |
| GCN1      | 0.00215551  | 0.99784449  | 1.100426467  | 2.146076816 |
| GCNT4     | 0.002153591 | 0.997846409 | 1.376791113  | 2.600135101 |
| GCOM1     | 0.002151141 | 0.997848859 | -1.21138286  | 0.431801774 |
| GCSH      | 0.002148648 | 0.997851352 | -2.098715552 | 0.213837876 |
| GDAP1L1   | 0.002148258 | 0.997851742 | -2.461734399 | 0.179757337 |
| GEM       | 0.002136719 | 0.997863281 | 0.663171404  | 1.584503856 |
| GEMIN4    | 0.002132944 | 0.997867056 | 4.225330798  | 26.67252125 |
| GEMIN5    | 0.002127338 | 0.997872662 | -0.777679053 | 0.582595321 |
| GEMIN6    | 0.002126884 | 0.997873116 | -0.616646482 | 0.650943996 |
| GEMIN7    | 0.002119721 | 0.997880279 | -1.355842827 | 0.386187635 |
| GEMIN8    | 0.002116596 | 0.997883404 | 0.991876674  | 1.999122896 |
| GFM1      | 0.002112544 | 0.997887456 | -1.452877313 | 0.36169438  |
| GG2       | 0.00211122  | 0.99788878  | -0.788764645 | 0.575879944 |
| GGCT      | 0.002106229 | 0.997893771 | 1.010777004  | 2.015468592 |
| GGCX      | 0.002102586 | 0.997897414 | -0.9216438   | 0.527878488 |
| GGH       | 0.002101973 | 0.997898027 | -2.675086313 | 0.156253017 |
| GGT1      | 0.002096597 | 0.997903403 | -1.810426994 | 0.269148916 |
| GGT7      | 0.002095565 | 0.997904435 | -1.150833161 | 0.450317882 |
| GGTA1P    | 0.002095395 | 0.997904605 | -1.440556022 | 0.368331902 |
| GHTM      | 0.002093091 | 0.997906909 | 1.053142668  | 2.082492507 |
| GHR       | 0.002084096 | 0.997915904 | -3.273180822 | 0.063143838 |
| GINS1     | 0.002082042 | 0.997917958 | 0.813892194  | 1.758906182 |
| GINS2     | 0.002080752 | 0.997919248 | -1.190348958 | 0.4323369   |
| GINS3     | 0.002069999 | 0.997930001 | -0.911563726 | 0.531467024 |
| GINS4     | 0.002067843 | 0.997932157 | -1.773833828 | 0.286017582 |
| GK        | 0.002060431 | 0.997939569 | -2.231890734 | 0.206648445 |
| GLA       | 0.002059962 | 0.997940038 | -2.570093183 | 0.164969527 |
| GLB1L2    | 0.002056606 | 0.997943394 | -1.838078524 | 0.279340068 |
| GLDC      | 0.002054884 | 0.997945116 | 1.592543029  | 3.018960282 |
| GLDN      | 0.002049727 | 0.997950273 | 0.755745488  | 1.689821441 |
| GLI2      | 0.002041811 | 0.997958189 | -3.729246802 | 0.057055084 |
| GLI3      | 0.002036251 | 0.997963749 | 0.686241699  | 1.609450592 |
| GLI53     | 0.002034224 | 0.997965776 | -2.47439622  | 0.17971822  |
| GLO1      | 0.002030128 | 0.997969872 | -1.631882156 | 0.32183581  |
| GLOD4     | 0.002025877 | 0.997974123 | -2.72911755  | 0.148243701 |
| GLRB      | 0.002022386 | 0.997977614 | 1.016606946  | 2.023366939 |
| GLRX3     | 0.002015504 | 0.997984496 | 1.235363829  | 2.392288846 |
| GLRX5     | 0.002009372 | 0.997990628 | -0.682851545 | 0.62285107  |
| GLTSCR1L  | 0.001999218 | 0.998000782 | -1.353570422 | 0.386269735 |
| GLYATL1P4 | 0.001997052 | 0.998002948 | 1.118916435  | 2.177658523 |
| GMDS      | 0.00199592  | 0.99800408  | -1.945477062 | 0.258753242 |
| GMDS-AS1  | 0.001984893 | 0.998015107 | -2.23408262  | 0.193126849 |
| GNAZ      | 0.001982316 | 0.998017684 | 1.019305539  | 2.031310156 |
| GNB2L1    | 0.001982104 | 0.998017896 | 1.494541111  | 2.831046142 |
| GNB5      | 0.001980571 | 0.998019429 | -3.08525505  | 0.111787271 |
| GN2       | 0.001977831 | 0.998022169 | -2.066974499 | 0.223473132 |
| GN7       | 0.001965216 | 0.998034784 | -2.393180283 | 0.187039035 |
| GNL2      | 0.001962031 | 0.998037969 | -2.404230012 | 0.187498974 |
| GNL3      | 0.001957617 | 0.998042383 | -2.081006045 | 0.236325999 |
| GNL3L     | 0.001954479 | 0.998045521 | -2.532282362 | 0.166192239 |
| GNPDA1    | 0.001940383 | 0.998059617 | 0.8049233036 | 1.748974359 |
| GNPNAT1   | 0.001939337 | 0.998060663 | -1.252267428 | 0.414914132 |
| GNPTAB    | 0.001931439 | 0.998068561 | -0.817533731 | 0.566825942 |
| GNRH1     | 0.001924173 | 0.998075827 | 0.976310906  | 1.968223488 |
| GOLGA7B   | 0.001914641 | 0.998085359 | 0.520183306  | 1.435263832 |
| GOLM1     | 0.001910222 | 0.998089778 | -2.214546637 | 0.208429234 |
| GORASP2   | 0.001903548 | 0.998096452 | -2.161117379 | 0.208659158 |
| GOT1      | 0.001896629 | 0.998103371 | 1.792861376  | 3.493459454 |
| GOT2      | 0.00189273  | 0.99810727  | 1.215520856  | 2.324401573 |
| GP1BA     | 0.001890173 | 0.998109827 | -1.184639027 | 0.438508018 |
| GPATCH4   | 0.001872784 | 0.998127216 | -2.27277471  | 0.189257168 |
| GPCPD1    | 0.001870587 | 0.998129413 | 1.276546678  | 2.426259785 |
| GPHN      | 0.00186518  | 0.99813482  | -1.328254016 | 0.396801973 |
| GPI       | 0.001857753 | 0.998142247 | 1.109159368  | 2.159036734 |
| GPR12     | 0.001855447 | 0.998144553 | -1.83771414  | 0.272692679 |
| GPR137B   | 0.001853312 | 0.99814688  | -1.039652833 | 0.483305715 |
| GPR137C   | 0.001846602 | 0.998153398 | -1.212724969 | 0.430180851 |
| GPR155    | 0.001845312 | 0.998154688 | -0.661794557 | 0.63200828  |
| GPR156    | 0.001844145 | 0.998155855 | -1.137427227 | 0.45301987  |
| GPR161    | 0.001838519 | 0.998161481 | 0.925634054  | 1.900019971 |
| GPR173    | 0.001837182 | 0.998162818 | -2.486433791 | 0.165806829 |
| GPR183    | 0.001834623 | 0.998165377 | 0.901608033  | 1.868492687 |
| GPR34     | 0.001833452 | 0.998166548 | -1.490784152 | 0.350651443 |
| GPR55     | 0.001830931 | 0.998169069 | 1.370637689  | 2.595550642 |
| GPR63     | 0.001829332 | 0.998170668 | 1.028385866  | 2.043425235 |

|              |             |             |              |             |
|--------------|-------------|-------------|--------------|-------------|
| GPR82        | 0.001823465 | 0.998176535 | -0.635540384 | 0.64332158  |
| GPRASP1      | 0.001821331 | 0.998178669 | 0.767600735  | 1.702551852 |
| GPRASP2      | 0.001820271 | 0.998179729 | -1.18555956  | 0.439510432 |
| GPRCSB       | 0.001814118 | 0.998185882 | -1.224895692 | 0.42725965  |
| GPT          | 0.001810872 | 0.998189128 | -0.518486598 | 0.697729887 |
| GPT2         | 0.001808221 | 0.998191779 | 0.950594421  | 1.933830033 |
| GPX1         | 0.001807569 | 0.998192431 | -0.882062602 | 0.539799565 |
| GPX3         | 0.001804562 | 0.998195438 | -0.996612306 | 0.500082595 |
| GRAMD1C      | 0.00180174  | 0.99819826  | -0.876924268 | 0.543910604 |
| GRAMD3       | 0.00179688  | 0.99820312  | -2.458639104 | 0.171441095 |
| GRB10        | 0.001796252 | 0.998203748 | -1.3864096   | 0.374379751 |
| GRIA2        | 0.001796017 | 0.998203983 | -1.108234132 | 0.462794209 |
| GRIN2A       | 0.001793832 | 0.998206168 | -1.300949997 | 0.403132205 |
| GRIN2B       | 0.001791316 | 0.998208684 | -1.05309076  | 0.480356972 |
| GRK5         | 0.001775958 | 0.998224042 | -1.388579369 | 0.376876359 |
| GRK5-IT1     | 0.001767814 | 0.998232186 | -1.882574805 | 0.258787479 |
| GRPEL1       | 0.001740641 | 0.998259359 | -1.27836375  | 0.41216945  |
| GRPEL2       | 0.00173649  | 0.99826351  | 0.94004755   | 1.919108714 |
| GRSF1        | 0.001735482 | 0.998264518 | 0.894667623  | 1.862203762 |
| GRWD1        | 0.001735469 | 0.998264531 | -3.275565742 | 0.071955687 |
| GSI-124K5.10 | 0.001722037 | 0.998277963 | -0.788955542 | 0.577849011 |
| GSI-124K5.11 | 0.00171978  | 0.99828022  | 1.130561487  | 2.198767707 |
| GSI-124K5.4  | 0.001717461 | 0.998282539 | -2.897000153 | 0.125383345 |
| GSI-204112.3 | 0.001714787 | 0.998285213 | -2.05443229  | 0.221675351 |
| GSI-304P7.1  | 0.001710326 | 0.998289674 | -1.682760957 | 0.309920582 |
| GSI-304P7.2  | 0.001704207 | 0.998295793 | -1.565246688 | 0.335821182 |
| GSI-358P8.4  | 0.00170412  | 0.99829588  | -2.755264641 | 0.144255601 |
| GSAP         | 0.001693534 | 0.998306466 | -1.213289615 | 0.425362224 |
| GSE1         | 0.001691164 | 0.998308836 | 1.634291656  | 3.14154581  |
| GSG2         | 0.00169012  | 0.99830988  | -1.238470848 | 0.417979599 |
| GSN-AS1      | 0.001684277 | 0.998315723 | -0.9767417   | 0.508006585 |
| GSTA1        | 0.001682253 | 0.998317747 | -1.666636803 | 0.30554567  |
| GSTO1        | 0.001680322 | 0.998319678 | 0.644247687  | 1.565359367 |
| GSTP1        | 0.001656455 | 0.998343545 | 0.90386862   | 1.873131901 |
| GTFF2E1      | 0.001655811 | 0.998344189 | 0.853190449  | 1.808926161 |
| GTFF2H2C     | 0.001640907 | 0.998359093 | -0.810938952 | 0.569819423 |
| GTFF2H3      | 0.001636792 | 0.998363208 | -1.712527522 | 0.298263568 |
| GTFF2IP4     | 0.001634342 | 0.998365658 | -1.179386101 | 0.44129892  |
| GTFF2IRD2    | 0.001633191 | 0.998366809 | -2.235595725 | 0.21216132  |
| GTFF2IRD2B   | 0.001632643 | 0.998367357 | -3.087671262 | 0.082364754 |
| GTFF3A       | 0.001625425 | 0.998374575 | 0.811663965  | 1.758962286 |
| GTFF3C2      | 0.001623293 | 0.998376707 | -1.242567444 | 0.422273574 |
| GTPBP3       | 0.001618781 | 0.998381219 | -4.396446367 | 0.047312942 |
| GTPBP4       | 0.00161478  | 0.99838522  | 1.176690583  | 2.261919416 |
| GTSE1        | 0.001610919 | 0.998389081 | 1.280205546  | 2.453944615 |
| GUCD1        | 0.00160846  | 0.99839154  | -1.331458855 | 0.39434257  |
| GUCY1A3      | 0.001607135 | 0.998392865 | 0.577827873  | 1.493732694 |
| GUCY1B2      | 0.001598561 | 0.998401439 | 0.723457529  | 1.651751699 |
| GUCY1B3      | 0.001590855 | 0.998409145 | -0.942150663 | 0.518663095 |
| GYS1         | 0.001590102 | 0.998409898 | -0.636414142 | 0.643272435 |
| H1F0         | 0.001589907 | 0.998410093 | 1.064105611  | 2.09213739  |
| H2AFZ        | 0.001589713 | 0.998410287 | -1.01225492  | 0.495576398 |
| HAO          | 0.001580612 | 0.998419388 | -1.149411391 | 0.448717229 |
| HABP4        | 0.001573244 | 0.998426756 | 1.498212192  | 2.828368829 |
| HADHA        | 0.001568331 | 0.998431669 | -2.320492903 | 0.199791887 |
| HAGHL        | 0.001562736 | 0.998437264 | -2.105293484 | 0.212649698 |
| HAO2         | 0.001562723 | 0.998437277 | 0.892773302  | 1.865984724 |
| HARS         | 0.001559752 | 0.998440248 | -1.774670924 | 0.284150799 |
| HAS3         | 0.001537342 | 0.998462658 | 0.6927161    | 1.618150155 |
| HAUS4        | 0.001523936 | 0.998476064 | 0.934304809  | 1.91185118  |
| HAUS6        | 0.001522052 | 0.998477948 | 0.850606514  | 1.803489263 |
| HAX1         | 0.001520812 | 0.998479188 | -3.869518568 | 0.067260037 |
| HCG17        | 0.001516336 | 0.998483664 | -1.297405774 | 0.405301467 |
| HCP5         | 0.001504099 | 0.998495901 | -3.214281945 | 0.100694791 |
| HDAC1P2      | 0.001503247 | 0.998496753 | -1.114813485 | 0.461375353 |
| HDAC3        | 0.001500846 | 0.998499154 | -2.135242011 | 0.22681844  |
| HDGF         | 0.001489707 | 0.998510293 | 1.237068997  | 2.372939758 |
| HDLBP        | 0.001484325 | 0.998515675 | -0.776921408 | 0.583202781 |
| HEATR1       | 0.001475709 | 0.998524291 | -2.403449862 | 0.188730579 |
| HEATR3       | 0.001472078 | 0.998527922 | 1.344853652  | 2.541068699 |
| HEATR9       | 0.001470238 | 0.998529762 | -0.749668272 | 0.594098852 |
| HECW2        | 0.001465962 | 0.998534038 | -3.273231628 | 0.063141514 |
| HEG1         | 0.001464518 | 0.998535482 | -0.785665055 | 0.577700722 |
| HELLS        | 0.001461272 | 0.998538728 | 1.001888963  | 2.003058421 |
| HEPH         | 0.001458719 | 0.998541281 | 0.655707397  | 1.576155667 |
| HERCS        | 0.001448181 | 0.998551819 | 1.030078319  | 2.059419728 |
| HERC6        | 0.001445891 | 0.998554109 | 1.521060457  | 2.93452701  |
| HERPUD2      | 0.001445079 | 0.998554921 | -1.067852308 | 0.476975827 |
| HES1         | 0.00144317  | 0.99855683  | -2.081217773 | 0.23414296  |
| HEXIM1       | 0.001436915 | 0.998563085 | 0.582902887  | 1.497978355 |
| HEY2         | 0.001433692 | 0.998566308 | 0.898981954  | 1.864999717 |
| HEYL         | 0.001433683 | 0.998566317 | 0.924936066  | 1.899494562 |
| HGSNAT       | 0.001427548 | 0.998572452 | 1.700698125  | 3.409626727 |
| HHAT         | 0.00142146  | 0.99857854  | -0.748939054 | 0.593244703 |
| HHIP         | 0.001412942 | 0.998587058 | -1.842698564 | 0.277964599 |
| HIGD1C       | 0.001409563 | 0.998590437 | 1.2949199    | 2.455141819 |
| HIGD2A       | 0.001406372 | 0.998593628 | -1.071337145 | 0.470515102 |
| HILPDA       | 0.001396897 | 0.998603103 | -2.609751438 | 0.126917587 |
| HINT1        | 0.001389462 | 0.998610538 | -1.883129249 | 0.267493873 |
| HIST1H1A     | 0.001387649 | 0.998612351 | 0.699142708  | 1.624251168 |
| HIST1H1B     | 0.001386221 | 0.998613779 | 0.861069321  | 1.82018492  |
| HIST1H1C     | 0.001385977 | 0.998614023 | -1.089203137 | 0.469043221 |
| HIST1H1D     | 0.001378369 | 0.998621631 | -1.717581418 | 0.303270953 |

|            |             |             |              |             |
|------------|-------------|-------------|--------------|-------------|
| HIST1H2AB  | 0.001375129 | 0.998624871 | 0.765422067  | 1.700709975 |
| HIST1H2AE  | 0.001373683 | 0.998626317 | 1.005634422  | 2.008756279 |
| HIST1H2AG  | 0.001373435 | 0.998626565 | 1.711105095  | 3.293697399 |
| HIST1H2AH  | 0.00137208  | 0.99862792  | 1.198829818  | 2.302349786 |
| HIST1H2AI  | 0.001370677 | 0.998629323 | 1.038754587  | 2.054886096 |
| HIST1H2AJ  | 0.001370052 | 0.998629948 | 1.048672912  | 2.06866689  |
| HIST1H2BD  | 0.001365421 | 0.998634579 | -1.555955634 | 0.3368515   |
| HIST1H2BF  | 0.001362712 | 0.998637288 | -2.289838162 | 0.186856484 |
| HIST1H2BG  | 0.001356278 | 0.998643722 | 1.290099558  | 2.445664864 |
| HIST1H2BH  | 0.001356166 | 0.998643834 | 1.173104039  | 2.255367145 |
| HIST1H2BI  | 0.001356098 | 0.998643902 | 0.9203429    | 1.893087583 |
| HIST1H2BJ  | 0.001343498 | 0.998656502 | 1.458385088  | 2.779146706 |
| HIST1H2BK  | 0.001341437 | 0.998658563 | 2.999231964  | 9.578030875 |
| HIST1H2BL  | 0.001335522 | 0.998664478 | -1.465074757 | 0.362188037 |
| HIST1H2BM  | 0.00133548  | 0.99866452  | -1.367377674 | 0.387552543 |
| HIST1H2BN  | 0.001328922 | 0.998671078 | -1.740547063 | 0.290215481 |
| HIST1H2BO  | 0.001328748 | 0.998671252 | 1.37738664   | 2.613681916 |
| HIST1H3A   | 0.001328431 | 0.998671569 | 1.165688981  | 2.252673994 |
| HIST1H3B   | 0.00132231  | 0.99867769  | 1.246326149  | 2.37257757  |
| HIST1H3C   | 0.001321337 | 0.998678663 | -0.949691116 | 0.516608787 |
| HIST1H3E   | 0.001321171 | 0.998678829 | 1.06771602   | 2.111167923 |
| HIST1H3F   | 0.001319616 | 0.998680384 | 0.984731872  | 1.979196996 |
| HIST1H3G   | 0.001319261 | 0.998680739 | -0.904118326 | 0.533408013 |
| HIST1H3H   | 0.001319027 | 0.998680973 | -2.653360677 | 0.136067383 |
| HIST1H3I   | 0.001316715 | 0.998683285 | -1.780620807 | 0.286679568 |
| HIST1H3J   | 0.001307104 | 0.998692896 | 1.947190229  | 3.900994336 |
| HIST1H4A   | 0.001306441 | 0.998693559 | -1.321880845 | 0.399626478 |
| HIST1H4B   | 0.001305488 | 0.998694512 | -1.012683949 | 0.493427184 |
| HIST1H4C   | 0.001301632 | 0.998698368 | 1.977605264  | 3.99070139  |
| HIST1H4D   | 0.001300947 | 0.998699053 | 0.904100311  | 1.871882512 |
| HIST1H4H   | 0.00129509  | 0.99870491  | 1.220500357  | 2.331325802 |
| HIST1H4L   | 0.001293092 | 0.998706908 | -1.057084803 | 0.480513737 |
| HIST2H2AB  | 0.001292813 | 0.998707187 | -2.093262061 | 0.220804163 |
| HIST2H2AC  | 0.001288437 | 0.998711563 | 1.18238004   | 2.270142016 |
| HIST2H2BF  | 0.001288376 | 0.998711624 | 1.212147867  | 2.326059992 |
| HIST3H2A   | 0.001288047 | 0.998711953 | -1.28823327  | 0.406915961 |
| HIST3H2BB  | 0.001286963 | 0.998713037 | 1.03436943   | 2.048819397 |
| HIVEP1     | 0.001286239 | 0.998713761 | -1.712884265 | 0.30400108  |
| HJURP      | 0.001285974 | 0.998714026 | -1.265194223 | 0.415912387 |
| HK2        | 0.001272407 | 0.998727593 | -1.018895514 | 0.490259931 |
| HLA-DMA    | 0.001269484 | 0.998730516 | 0.991120766  | 1.992672977 |
| HLA-DOB    | 0.001266339 | 0.998733661 | -1.777029384 | 0.277761754 |
| HLA-DPA1   | 0.001265423 | 0.998734577 | -0.872866894 | 0.545858563 |
| HLA-L      | 0.001261873 | 0.998738127 | 1.143741843  | 2.210127021 |
| HLF        | 0.001261034 | 0.998738966 | -3.031380112 | 0.121087001 |
| HM13       | 0.001259032 | 0.998740968 | 0.761471061  | 1.696368267 |
| HMBS       | 0.001252454 | 0.998747546 | 1.16781915   | 2.246831476 |
| HMG1A      | 0.001249628 | 0.998750372 | 0.839973721  | 1.79267357  |
| HMG1P5     | 0.001238389 | 0.998761611 | 1.697274498  | 3.26170211  |
| HMG1B2     | 0.001236517 | 0.998763483 | 1.017027566  | 2.024470037 |
| HMG1B3     | 0.001234902 | 0.998765098 | -1.935790886 | 0.249511045 |
| HMG1L1     | 0.001233548 | 0.998766452 | 0.885804958  | 1.847914451 |
| HMG1C2     | 0.001231666 | 0.998768334 | -3.11794097  | 0.083990044 |
| HMG1N3-AS1 | 0.001220189 | 0.998779811 | 0.840166005  | 1.791239912 |
| HMG1XB3    | 0.001219981 | 0.998780019 | -2.363421096 | 0.1690724   |
| HMOX1      | 0.001218598 | 0.998781402 | 1.258151546  | 2.411658097 |
| HMOX2      | 0.00121638  | 0.99878362  | 1.529326779  | 2.888150132 |
| HN1        | 0.001214718 | 0.998785282 | -2.126441251 | 0.219553019 |
| HN1L       | 0.001206996 | 0.998793004 | -3.045882754 | 0.108259831 |
| HNRNPA1    | 0.001206436 | 0.998793564 | 1.670780623  | 3.207674147 |
| HNRNPA1P14 | 0.00120337  | 0.99879663  | -2.116312746 | 0.219945873 |
| HNRNPA1P33 | 0.001201888 | 0.998798112 | -0.578792974 | 0.668590363 |
| HNRNPA1P53 | 0.001198784 | 0.998801216 | -1.068076129 | 0.476822856 |
| HNRNPA1P54 | 0.001188507 | 0.998811493 | -1.45641174  | 0.36373158  |
| HNRNPAB    | 0.001186094 | 0.998813906 | -2.686199602 | 0.147100043 |
| HNRNPC     | 0.001183028 | 0.998816972 | -2.882004178 | 0.135419193 |
| HNRNPCP2   | 0.001179148 | 0.998820852 | -1.201052518 | 0.431284063 |
| HNRNPF     | 0.00117853  | 0.99882147  | -1.068739316 | 0.474756501 |
| HNRNPL     | 0.001178339 | 0.998821661 | -3.961188151 | 0.051838377 |
| HNRNPM     | 0.001175127 | 0.998824873 | -1.969396671 | 0.252735926 |
| HOMER2     | 0.001174896 | 0.998825104 | 0.772730777  | 1.709277547 |
| HOPX       | 0.001174106 | 0.998825894 | 1.710243679  | 3.308149372 |
| HOTAIRM1   | 0.001171605 | 0.998828395 | 0.961988926  | 1.949260881 |
| HOXA11     | 0.00117104  | 0.99882896  | 0.719095547  | 1.646554303 |
| HOXA3      | 0.001168852 | 0.998831148 | 0.610271669  | 1.526980483 |
| HOXB2      | 0.001163819 | 0.998836181 | 1.941058308  | 3.847332877 |
| HOXB3      | 0.001162294 | 0.998837706 | -2.01955428  | 0.232522995 |
| HOXB-AS1   | 0.001160611 | 0.998839389 | 0.620503062  | 1.537816444 |
| HOXB-AS2   | 0.001150224 | 0.998849776 | -1.062708165 | 0.478651753 |
| HOXC13     | 0.00114289  | 0.99885711  | -0.977360199 | 0.507344445 |
| HOXC6      | 0.001132635 | 0.998867365 | 0.795628828  | 1.737226288 |
| HOXC8      | 0.00113151  | 0.99886849  | 1.046877991  | 2.06674385  |
| HPDL       | 0.001129478 | 0.998870522 | 0.931138586  | 1.907122876 |
| HPGD       | 0.001127288 | 0.998872712 | -2.345881424 | 0.196416599 |
| HP56       | 0.001126432 | 0.998873568 | -1.808007455 | 0.28538048  |
| HRNR       | 0.001126394 | 0.998873606 | 0.680439756  | 1.605440198 |
| HRS12      | 0.001122716 | 0.998877284 | -3.246637863 | 0.105014932 |
| HS3ST1     | 0.001114228 | 0.998885772 | -1.35186679  | 0.384974014 |
| HS3ST3B1   | 0.001112882 | 0.998887118 | -0.802166454 | 0.573157603 |
| HS6ST2     | 0.001109943 | 0.998890057 | -1.013751736 | 0.49443893  |
| HSD11B1    | 0.001109102 | 0.998890898 | -1.22956817  | 0.426381201 |
| HSD17B10   | 0.001099315 | 0.998900685 | 1.273058805  | 2.418503664 |
| HSD17B2    | 0.001097222 | 0.998902778 | 0.981828728  | 1.977974348 |

|           |             |             |              |             |
|-----------|-------------|-------------|--------------|-------------|
| HSD3B1    | 0.001091956 | 0.998908044 | -2.3607026   | 0.174709469 |
| HSD3BP4   | 0.001090423 | 0.998909577 | -2.79948888  | 0.141014529 |
| HSD3BP5   | 0.001083765 | 0.998916235 | -2.71361904  | 0.129740389 |
| HSP90AB1  | 0.001082585 | 0.998917415 | -2.221898093 | 0.205440526 |
| HSPA12A   | 0.00108145  | 0.99891855  | 1.355864937  | 2.571613128 |
| HSPA1A    | 0.001079892 | 0.998920108 | -1.187890984 | 0.437269436 |
| HSPA1B    | 0.001069773 | 0.998930227 | -0.889931703 | 0.536722794 |
| HSPA2     | 0.001069509 | 0.998930491 | 1.833193805  | 3.670459756 |
| HSPA6     | 0.001067947 | 0.998932053 | -1.56132984  | 0.335796435 |
| HSPA8     | 0.001063456 | 0.998936544 | 1.523597663  | 2.896108812 |
| HSPA8P18  | 0.001061961 | 0.998938039 | 1.101693844  | 2.149942836 |
| HSPA8P3   | 0.001059496 | 0.998940504 | 0.76604054   | 1.701218778 |
| HSPA9     | 0.001058631 | 0.998941369 | 0.553419012  | 1.467894528 |
| HSPD1     | 0.001054006 | 0.998945994 | -0.967073493 | 0.508534493 |
| HTR2A     | 0.001053114 | 0.998946886 | -1.449604548 | 0.362574121 |
| HTR7      | 0.00105255  | 0.99894745  | -1.332298184 | 0.387781667 |
| HTRA1     | 0.001048678 | 0.998951322 | 1.112831372  | 2.163516359 |
| HYAL4     | 0.001048392 | 0.998951608 | 1.839192531  | 3.788411152 |
| HYDIN     | 0.001042388 | 0.998957612 | 2.63615464   | 7.423151054 |
| HYOU1     | 0.001042193 | 0.998957807 | -1.277737575 | 0.412412047 |
| IARS      | 0.001029921 | 0.998970079 | -0.924115946 | 0.52635354  |
| ICA1      | 0.001023782 | 0.998976218 | -1.239330152 | 0.4223406   |
| ICT1      | 0.001019994 | 0.998980006 | -1.745449319 | 0.298120976 |
| ID1       | 0.001019321 | 0.998980679 | 0.965755064  | 1.963645003 |
| ID2       | 0.001018442 | 0.998981558 | 0.602727426  | 1.519046798 |
| ID4       | 0.001015871 | 0.998984129 | -0.531012341 | 0.691813827 |
| IDH2      | 0.00101209  | 0.99898791  | -1.168593078 | 0.443631079 |
| IDH3A     | 0.001010091 | 0.998989909 | -3.048498043 | 0.110912575 |
| IDH3B     | 0.001009515 | 0.998990485 | -2.486881046 | 0.147005634 |
| IDS       | 0.001006723 | 0.998993277 | -0.631841161 | 0.644261786 |
| IER3      | 0.001002887 | 0.998997113 | -2.232405558 | 0.204301382 |
| IER5      | 0.001002441 | 0.998997559 | -0.900190893 | 0.533303089 |
| IFFO2     | 0.001000112 | 0.998999888 | -2.336256607 | 0.182083983 |
| IFI27     | 0.000998735 | 0.999001265 | 2.418380407  | 5.584840664 |
| IFI44     | 0.000997344 | 0.999002656 | -2.474815142 | 0.17323242  |
| IFIF      | 0.000996674 | 0.999003326 | -1.005579309 | 0.496338335 |
| IFIT1     | 0.000995804 | 0.999004196 | -0.738533926 | 0.599219546 |
| IFITM2    | 0.000993198 | 0.999006802 | -0.863568853 | 0.549027482 |
| IFITM3    | 0.000993197 | 0.999006803 | 0.958771879  | 1.946537263 |
| IFNAR2    | 0.000981417 | 0.999018583 | 1.62400517   | 3.084742641 |
| IFNK      | 0.000972001 | 0.999027999 | 0.773049896  | 1.709247045 |
| IFNLR1    | 0.000969088 | 0.999030912 | 0.605733771  | 1.522250848 |
| IGBP1     | 0.0009668   | 0.9990332   | 1.280905563  | 2.444650572 |
| IGF1R     | 0.000962947 | 0.999037053 | 1.025662464  | 2.040478628 |
| IGFBP4    | 0.000960917 | 0.999039083 | -2.399923236 | 0.177255643 |
| IGFL1     | 0.000955253 | 0.999044747 | -1.369664801 | 0.386685877 |
| IGFL2     | 0.000950294 | 0.999049706 | -1.550950107 | 0.339712991 |
| IGFL4     | 0.00094792  | 0.99905208  | -1.836245406 | 0.279550526 |
| IGIP      | 0.000947548 | 0.999052452 | 1.246181943  | 2.377553938 |
| IGSF10    | 0.000947232 | 0.999052768 | 1.892660155  | 3.752206319 |
| IGSF3     | 0.000941928 | 0.999058072 | -2.66054583  | 0.152064329 |
| IGSF5     | 0.000939887 | 0.999060113 | 1.335868749  | 2.530370152 |
| IL10RB    | 0.000935025 | 0.999064975 | -3.421313988 | 0.079756968 |
| IL12RB2   | 0.00093214  | 0.99906786  | 1.334490807  | 2.524260705 |
| IL15      | 0.000928404 | 0.999071596 | -2.127889283 | 0.219641382 |
| IL17RD    | 0.000925918 | 0.999074082 | 1.364560565  | 2.581174387 |
| IL18R1    | 0.000920548 | 0.999079452 | 1.100063285  | 2.154923197 |
| IL19      | 0.000917479 | 0.999082521 | 0.939634693  | 1.918502939 |
| IL1R1     | 0.000915542 | 0.999084458 | 1.011438372  | 2.019930906 |
| IL1RL1    | 0.000908813 | 0.999091187 | -2.324033709 | 0.18432912  |
| IL32      | 0.000908188 | 0.999091812 | 0.584505056  | 1.500128044 |
| IL33      | 0.000906626 | 0.999093374 | -1.917661209 | 0.250957218 |
| IL6R      | 0.000902023 | 0.999097977 | -1.244678485 | 0.418793217 |
| IL7       | 0.000899847 | 0.999100153 | 0.612098297  | 1.528661355 |
| ILF2      | 0.000893009 | 0.999106991 | 0.551866838  | 1.467178589 |
| ILF3      | 0.000891331 | 0.999108669 | 1.556125991  | 2.968202221 |
| ILK       | 0.000890538 | 0.999109462 | -1.183893014 | 0.436372344 |
| ILVBL     | 0.000888321 | 0.999111679 | -2.006201337 | 0.233380011 |
| IMMT      | 0.000888312 | 0.999111688 | 1.069228273  | 2.09889079  |
| IMP3      | 0.000882686 | 0.999117314 | -1.851432447 | 0.276280403 |
| IMP4      | 0.000882287 | 0.999117713 | 1.089007712  | 2.128371773 |
| IMPA2     | 0.00087748  | 0.99912252  | 1.214210938  | 2.320422806 |
| IMPDH1    | 0.000876664 | 0.999123336 | -1.643492705 | 0.308884008 |
| IMPDH2    | 0.000875166 | 0.999124834 | 1.454500581  | 2.751794285 |
| IMPG2     | 0.000873788 | 0.999126212 | -0.689073379 | 0.620085919 |
| INCENP    | 0.000873431 | 0.999126569 | 1.301380005  | 2.467496901 |
| ING4      | 0.000868781 | 0.999131219 | -1.613525766 | 0.312700435 |
| INHBA     | 0.000867297 | 0.999132703 | 0.739908105  | 1.67093699  |
| INHBA-AS1 | 0.000865336 | 0.999134664 | 0.859830413  | 1.81659576  |
| INHBB     | 0.000864576 | 0.999135424 | 1.34269814   | 2.575633094 |
| INPP1     | 0.000864266 | 0.999135734 | -1.198959214 | 0.434563989 |
| INSR      | 0.000857696 | 0.999142304 | -0.773693207 | 0.582551233 |
| INTS10    | 0.000857392 | 0.999142608 | -2.526552362 | 0.170386264 |
| INTS6-AS1 | 0.000855501 | 0.999144499 | 1.433538238  | 2.703995558 |
| INTS9     | 0.000855373 | 0.999144627 | -1.298410745 | 0.405829199 |
| IPO5      | 0.000851518 | 0.999148482 | -0.730560411 | 0.602634339 |
| IPPK      | 0.000851077 | 0.999148923 | -0.613062342 | 0.653066496 |
| IQCJ      | 0.000848353 | 0.999151647 | -1.061458149 | 0.476721916 |
| IQGAP1    | 0.000847356 | 0.999152644 | -1.55254554  | 0.339303328 |
| IQGAP3    | 0.000843548 | 0.999156452 | -1.522484942 | 0.339615713 |
| IRAK1     | 0.000839543 | 0.999160457 | -1.068519902 | 0.476764065 |
| IRF2BP2   | 0.000836795 | 0.999163205 | 1.924895754  | 4.078285298 |
| IRF2BPL   | 0.000834189 | 0.999165811 | 2.728809194  | 8.06003427  |

|              |             |             |              |             |
|--------------|-------------|-------------|--------------|-------------|
| IRF6         | 0.000833911 | 0.999166089 | 1.048553657  | 2.08951586  |
| IRF9         | 0.000831938 | 0.999168062 | 1.000870636  | 2.01346169  |
| IRS1         | 0.000831624 | 0.999168376 | -2.464249291 | 0.17387492  |
| IRX3         | 0.000828446 | 0.999171554 | -1.674535269 | 0.297542946 |
| IRX5         | 0.000825908 | 0.999174092 | 1.089189314  | 2.131825114 |
| ISCA1        | 0.000824671 | 0.999175329 | 2.559645988  | 6.719988834 |
| ISCU         | 0.000818747 | 0.999181253 | 1.053716014  | 2.08133126  |
| ISG20L2      | 0.000816436 | 0.999183564 | -2.555172071 | 0.156098229 |
| ISM1         | 0.000807732 | 0.999192268 | 1.371536308  | 2.594888326 |
| ISOC1        | 0.000803912 | 0.999196088 | -0.993609038 | 0.501937891 |
| ITGA10       | 0.000801451 | 0.999198549 | 1.154275375  | 2.229787917 |
| ITGA11       | 0.00080073  | 0.99919927  | -1.492748913 | 0.34743767  |
| ITGA4        | 0.000795532 | 0.999204468 | -0.721371488 | 0.606386292 |
| ITGA9        | 0.00079184  | 0.99920816  | 1.929089535  | 3.821419744 |
| ITGA9-AS1    | 0.000785299 | 0.999214701 | 1.256634969  | 2.389559083 |
| ITGB2        | 0.000784926 | 0.999215074 | 1.823658258  | 3.612136092 |
| ITGB2-AS1    | 0.000783478 | 0.999216522 | -1.769699907 | 0.278138408 |
| ITGB5        | 0.000778629 | 0.999221371 | 1.555751913  | 2.954100095 |
| ITGB5-AS1    | 0.000775859 | 0.999224141 | -2.418200858 | 0.176842357 |
| ITGB8        | 0.000775533 | 0.999224467 | -0.571202633 | 0.672348608 |
| ITIH5        | 0.000764395 | 0.999235605 | 1.108097205  | 2.158862171 |
| ITPA         | 0.000764384 | 0.999235616 | -1.965250345 | 0.244182459 |
| ITPK1        | 0.000762485 | 0.999237515 | -0.944936738 | 0.517076726 |
| ITPK1-AS1    | 0.000760195 | 0.999239805 | 1.568090486  | 2.970595296 |
| ITPR1        | 0.000756862 | 0.999243138 | -0.581358059 | 0.668264593 |
| ITPR2        | 0.000755236 | 0.999244764 | -2.337343708 | 0.192802477 |
| ITSN1        | 0.000753126 | 0.999246874 | 0.797003955  | 1.741739562 |
| JAG1         | 0.000752037 | 0.999247963 | 0.889715522  | 1.853608741 |
| JAGN1        | 0.000752005 | 0.999247995 | 1.149476486  | 2.219212825 |
| JAK3         | 0.000751307 | 0.999248693 | 0.984637308  | 1.980210178 |
| JAM2         | 0.000747177 | 0.999252823 | 0.736854689  | 1.666672253 |
| JDP2         | 0.000745379 | 0.999254621 | 1.154109576  | 2.225766909 |
| JMID4        | 0.000744762 | 0.999255238 | -0.850167219 | 0.554710362 |
| JTB          | 0.000744177 | 0.999255823 | 0.987600826  | 1.983406323 |
| KALRN        | 0.000739115 | 0.999260885 | -0.947049095 | 0.51741135  |
| KANK2        | 0.000738353 | 0.999261647 | 1.521560601  | 2.886469466 |
| KANK4        | 0.000729338 | 0.999270662 | -2.161052398 | 0.220198961 |
| KARS         | 0.0007289   | 0.9992711   | 0.697630192  | 1.621917855 |
| KAT2A        | 0.000728638 | 0.999271362 | -1.250236857 | 0.414554158 |
| KAT2B        | 0.000728179 | 0.999271821 | 0.716554358  | 1.643667641 |
| KATNAL1      | 0.000728016 | 0.999271984 | 1.026752137  | 2.041347002 |
| KAZALD1      | 0.000725879 | 0.999274121 | -2.436672604 | 0.181977583 |
| KB-1396H2.2  | 0.000724365 | 0.999275635 | 1.910759649  | 3.784697419 |
| KB-1460A1.5  | 0.000724027 | 0.999275973 | 1.634655801  | 3.134704537 |
| KB-1562D12.1 | 0.000722373 | 0.999277627 | 0.871813475  | 1.830265877 |
| KB-1836B5.1  | 0.000722258 | 0.999277742 | -2.206215227 | 0.215092188 |
| KB-1958F4.1  | 0.000721269 | 0.999278731 | -0.560129732 | 0.677811846 |
| KB-7G2.9     | 0.000716379 | 0.999283621 | -1.278368335 | 0.41193755  |
| KBTBD3       | 0.000712084 | 0.999287916 | -0.710017597 | 0.609424319 |
| KBTBD8       | 0.000709627 | 0.999290373 | -1.275898936 | 0.412957896 |
| KCNA7        | 0.000708689 | 0.999291311 | 1.736571202  | 3.334250285 |
| KCNB1        | 0.000708222 | 0.999291778 | -3.846998886 | 0.042810968 |
| KCNH1        | 0.00070735  | 0.99929265  | -2.37820554  | 0.190509645 |
| KCNH2        | 0.000705179 | 0.999294821 | 1.149324789  | 2.246305871 |
| KCNH8        | 0.000702979 | 0.999297021 | 1.228563694  | 2.345466556 |
| KCNIP1       | 0.000702254 | 0.999297746 | -1.554935404 | 0.334883496 |
| KCNJ15       | 0.000700092 | 0.999299908 | -1.440217233 | 0.367068212 |
| KCNJ2        | 0.000700091 | 0.999299909 | 0.809562569  | 1.755314021 |
| KCNJ5        | 0.000698013 | 0.999301987 | -1.076526744 | 0.472464876 |
| KCNK1        | 0.000694433 | 0.999305567 | -4.361384325 | 0.040412632 |
| KCNK12       | 0.000693953 | 0.999306047 | 0.707405781  | 1.632897045 |
| KCNK15       | 0.000693161 | 0.999306839 | -2.317544652 | 0.197674552 |
| KCNK6        | 0.000692577 | 0.999307423 | 1.082814116  | 2.118587618 |
| KCNMA1       | 0.000690519 | 0.999309481 | -3.822510339 | 0.051846726 |
| KCNMB1       | 0.000687562 | 0.999312438 | -2.757976418 | 0.117888464 |
| KCNMB4       | 0.000686413 | 0.999313587 | 0.530097894  | 1.444201924 |
| KCNN3        | 0.000686308 | 0.999313692 | 0.542271885  | 1.457714215 |
| KCNN4        | 0.000682566 | 0.999317434 | 1.058930685  | 2.083520067 |
| KCNQ1OT1     | 0.000680942 | 0.999319058 | -1.013440706 | 0.494609648 |
| KCNQ4        | 0.000680864 | 0.999319136 | 1.557630066  | 2.974290688 |
| KCNQ5        | 0.00068002  | 0.99931998  | 1.369881534  | 2.585561745 |
| KCNQ5-AS1    | 0.000679441 | 0.999320559 | 0.731949746  | 1.661425439 |
| KCNQ5-IT1    | 0.000672146 | 0.999327854 | -1.607867834 | 0.318737668 |
| KCNRG        | 0.000671917 | 0.999328083 | -2.073217274 | 0.229705516 |
| KCNS2        | 0.000670294 | 0.999329706 | -0.972930114 | 0.509119199 |
| KCNU1        | 0.000667846 | 0.999332154 | -1.17279048  | 0.436690901 |
| KCTD1        | 0.000666751 | 0.999333249 | 1.106311453  | 2.15505617  |
| KCTD19       | 0.000664821 | 0.999335179 | -0.961463049 | 0.513165115 |
| KCTD7        | 0.0006632   | 0.9993368   | -0.553427581 | 0.681075696 |
| KDM1A        | 0.000656714 | 0.999343286 | 1.636561294  | 3.115602597 |
| KDR          | 0.00065654  | 0.99934346  | -1.706242757 | 0.303319105 |
| KHSRP        | 0.000654323 | 0.999345677 | -1.012834899 | 0.493991947 |
| KIAA0040     | 0.00065119  | 0.99934881  | -1.847177603 | 0.269345204 |
| KIAA0100     | 0.00065073  | 0.99934927  | 1.246946939  | 2.376681577 |
| KIAA0101     | 0.000649398 | 0.999350602 | -1.408753328 | 0.367901552 |
| KIAA0226L    | 0.000648232 | 0.999351768 | -2.750196937 | 0.144488249 |
| KIAA0355     | 0.000648014 | 0.999351986 | 1.287463735  | 2.441192072 |
| KIAA0825     | 0.000647559 | 0.999352441 | -3.166312799 | 0.104060312 |
| KIAA1107     | 0.00064358  | 0.99935642  | -1.033735108 | 0.487402815 |
| KIAA1161     | 0.000639599 | 0.999360401 | 1.686397092  | 3.218643502 |
| KIAA1211L    | 0.000634037 | 0.999365963 | 0.977831472  | 1.976571464 |
| KIAA1324     | 0.000633771 | 0.999366229 | 0.547057057  | 1.462103793 |
| KIAA1324L    | 0.000632551 | 0.999367449 | -2.566156918 | 0.136018916 |

|               |             |             |              |             |
|---------------|-------------|-------------|--------------|-------------|
| KIAA1328      | 0.000630171 | 0.999369829 | -2.075038215 | 0.236549152 |
| KIAA1456      | 0.000629869 | 0.999370131 | -3.421394439 | 0.088799437 |
| KIAA1549L     | 0.00062898  | 0.99937102  | 0.533781731  | 1.447941888 |
| KIAA1644      | 0.000621673 | 0.999378327 | -1.098449579 | 0.462770048 |
| KIAA1841      | 0.000621496 | 0.999378504 | -1.257498415 | 0.412019309 |
| KIAA2013      | 0.000621211 | 0.999378789 | 0.547772457  | 1.462953363 |
| KIDINS220     | 0.000621177 | 0.999378823 | -1.814504443 | 0.283508513 |
| KIF13A        | 0.000618206 | 0.999381794 | 0.830928729  | 1.780369611 |
| KIF13B        | 0.000616627 | 0.999383373 | 1.686142966  | 3.22125658  |
| KIF18B        | 0.000615812 | 0.999384188 | -1.361772982 | 0.384080904 |
| KIF20A        | 0.000615104 | 0.999384896 | 1.264021658  | 2.402738497 |
| KIF22         | 0.000614553 | 0.999385447 | 1.229905648  | 2.362140598 |
| KIF24         | 0.000613077 | 0.999386923 | -2.002919263 | 0.242335463 |
| KIF26B        | 0.000612272 | 0.999387728 | 0.980379864  | 1.974785245 |
| KIF28P        | 0.000610172 | 0.999389828 | -1.594514392 | 0.322345137 |
| KIF2C         | 0.00060957  | 0.99939043  | 1.48350506   | 2.812822979 |
| KIF4A         | 0.000605388 | 0.999394612 | -4.637500492 | 0.032013758 |
| KIF5C         | 0.000602861 | 0.999397139 | 1.248235156  | 2.386884887 |
| KIF9          | 0.000601082 | 0.999398918 | 0.850855643  | 1.804001886 |
| KIFC1         | 0.000599376 | 0.999400624 | -1.297818326 | 0.403484926 |
| KIRREL        | 0.000597174 | 0.999402826 | -0.635502261 | 0.642721003 |
| KIRREL-IT1    | 0.000597022 | 0.999402978 | -1.020411217 | 0.49283975  |
| KIT           | 0.000595927 | 0.999404073 | -1.603366904 | 0.319252469 |
| KIZ-AS1       | 0.000593549 | 0.999406451 | 0.838032471  | 1.793905602 |
| KLC1          | 0.000590434 | 0.999409566 | -1.691464919 | 0.306478038 |
| KLF10         | 0.000588087 | 0.999411913 | 1.243864501  | 2.376753727 |
| KLF12         | 0.000587411 | 0.999412589 | -2.540082976 | 0.166871484 |
| KLF3          | 0.00058586  | 0.99941414  | -0.701414892 | 0.614594029 |
| KLF3-AS1      | 0.000579484 | 0.999420516 | -0.609171182 | 0.654923782 |
| KLF4          | 0.000579195 | 0.999420805 | 0.558266817  | 1.472869542 |
| KLF5          | 0.000577599 | 0.999422401 | -1.05506655  | 0.477953696 |
| KLF7          | 0.000576415 | 0.999423585 | 1.635601759  | 3.172603012 |
| KLF8          | 0.000574704 | 0.999425296 | -0.558484617 | 0.678816533 |
| KLHDC1        | 0.000574415 | 0.999425585 | -0.856377638 | 0.551789595 |
| KLHDC3        | 0.000572648 | 0.999427352 | -1.452203401 | 0.361949352 |
| KLHDC4        | 0.000569309 | 0.999430691 | 0.969509594  | 1.960581655 |
| KLHDC8B       | 0.000568329 | 0.999431671 | 1.298831362  | 2.460885868 |
| KLHL18        | 0.000568053 | 0.999431947 | -3.801515225 | 0.065476237 |
| KLHL3         | 0.00056472  | 0.99943528  | 1.102483003  | 2.148288784 |
| KLHL31        | 0.000562727 | 0.999437273 | 0.554296855  | 1.468609011 |
| KLHL5         | 0.000560783 | 0.999439217 | -2.934774327 | 0.126322067 |
| KLK14         | 0.000558826 | 0.999441174 | -1.813542673 | 0.278685322 |
| KLK6          | 0.000552963 | 0.999447037 | -1.553582864 | 0.340485728 |
| KLRD1         | 0.000540016 | 0.999459984 | 0.728748521  | 1.657272284 |
| KLRL1         | 0.000539671 | 0.999460329 | -3.405133611 | 0.093905849 |
| KMT2E         | 0.000539572 | 0.999460428 | -1.426738518 | 0.371608839 |
| KNOP1         | 0.000538716 | 0.999461284 | 0.707165023  | 1.633178778 |
| KNOP1P4       | 0.00053835  | 0.99946165  | -1.018251415 | 0.490605255 |
| KNSTRN        | 0.00052899  | 0.99947101  | 0.940625875  | 1.920408396 |
| KPNA2         | 0.000525686 | 0.999474314 | 0.814192405  | 1.758407298 |
| KRCC1         | 0.0005248   | 0.9994752   | 0.709636304  | 1.635547828 |
| KRI1          | 0.000523954 | 0.999476046 | -1.965224909 | 0.253143193 |
| KRT12         | 0.000522551 | 0.999477449 | 1.233164203  | 2.378911306 |
| KRT14         | 0.000522113 | 0.999477887 | -0.722829004 | 0.604520508 |
| KRT16P6       | 0.000518785 | 0.999481215 | -3.045196549 | 0.09333712  |
| KRT18         | 0.000518192 | 0.999481808 | -1.409971471 | 0.375811081 |
| KRT18P61      | 0.000518036 | 0.999481964 | 1.154965325  | 2.242853311 |
| KRT19         | 0.000517135 | 0.999482865 | 1.464006948  | 2.772840941 |
| KRT23         | 0.000516774 | 0.999483226 | -2.19064186  | 0.196891746 |
| KRT4          | 0.000514399 | 0.999485601 | -2.67620345  | 0.14791259  |
| KRT75         | 0.000514036 | 0.999485964 | 1.120849182  | 2.175596414 |
| KRT77         | 0.00050494  | 0.99949506  | 1.20446206   | 2.307917206 |
| KRT8          | 0.000502786 | 0.999497214 | -0.796813    | 0.575477454 |
| KTI12         | 0.000502386 | 0.999497614 | -1.764150369 | 0.293104643 |
| KTN1-AS1      | 0.000499759 | 0.999500241 | -0.783937941 | 0.580664099 |
| L2HGDH        | 0.000498268 | 0.999501732 | 0.741782941  | 1.675700201 |
| L3HYDPH       | 0.000497583 | 0.999502417 | 1.07480266   | 2.110881412 |
| L3MBTL3       | 0.000493589 | 0.999506411 | 1.0442411    | 2.062914817 |
| LA16c-380H5.3 | 0.000492377 | 0.999507623 | 1.241708306  | 2.366136217 |
| LA16c-380H5.5 | 0.000492269 | 0.999507731 | -0.811352266 | 0.569096665 |
| LA16c-431H6.7 | 0.000491246 | 0.999508754 | -1.732471978 | 0.299956357 |
| LAGE3         | 0.000490145 | 0.999509855 | -2.070990977 | 0.230603532 |
| LAMA1         | 0.000489437 | 0.999510563 | -0.818957479 | 0.56667033  |
| LAMA2         | 0.000488062 | 0.999511938 | -1.440928725 | 0.364858141 |
| LAMP5         | 0.000488037 | 0.999511963 | 0.544747093  | 1.458983101 |
| LAMTOR2       | 0.00048508  | 0.99951492  | 1.542081426  | 2.967679106 |
| LANCL1-AS1    | 0.000484931 | 0.999515069 | 0.73756717   | 1.67240723  |
| LANCL2        | 0.000482778 | 0.999517222 | 1.067925205  | 2.098054226 |
| LANCL3        | 0.000481956 | 0.999518044 | 1.06702946   | 2.097162552 |
| LAP3          | 0.000481904 | 0.999518096 | 3.855982788  | 16.21971257 |
| LARP1         | 0.000480023 | 0.999519977 | 0.781871473  | 1.720873458 |
| LARP6         | 0.000478544 | 0.999521456 | -2.896902149 | 0.105012843 |
| LARS          | 0.000476459 | 0.999523541 | 0.885747019  | 1.8505928   |
| LARS2         | 0.000475043 | 0.999524957 | -1.678007747 | 0.309245465 |
| LAS1L         | 0.000475026 | 0.999524974 | -0.771510567 | 0.583513628 |
| LATS2         | 0.000474468 | 0.999525532 | -0.720668624 | 0.605557546 |
| LBP           | 0.000468245 | 0.999531755 | 1.311729676  | 2.482538341 |
| LBR           | 0.000465664 | 0.999534336 | -2.536763517 | 0.168886969 |
| LCA5          | 0.000459987 | 0.999540013 | 1.185884833  | 2.275300348 |
| LCN2          | 0.000459462 | 0.999540538 | 0.75575143   | 1.689536011 |
| LCT           | 0.000458055 | 0.999541945 | 1.07887638   | 2.112586602 |
| LDB3          | 0.000455664 | 0.999544336 | -0.791891297 | 0.576836031 |
| LDHA          | 0.000452958 | 0.999547042 | -2.342492973 | 0.194491589 |





|             |             |             |              |             |
|-------------|-------------|-------------|--------------|-------------|
| LMX1B       | 0.000336467 | 0.999663533 | -1.353872761 | 0.387513093 |
| LONP1       | 0.000336348 | 0.999663652 | 0.766946009  | 1.702448801 |
| LONRF2      | 0.000335814 | 0.999664186 | 0.941393074  | 1.923459903 |
| LOXL1-AS1   | 0.00033579  | 0.99966421  | -0.642919149 | 0.640065548 |
| LOXL2       | 0.000334545 | 0.999665455 | -1.972071117 | 0.240644488 |
| LOXL4       | 0.000331386 | 0.999668614 | -0.894750163 | 0.535761415 |
| LPAR3       | 0.000330359 | 0.999669641 | 0.924522446  | 1.900096542 |
| LPAR5       | 0.000330288 | 0.999669712 | 0.642826311  | 1.562574718 |
| LPCAT1      | 0.000327142 | 0.999672858 | -0.636499479 | 0.642605157 |
| LPCAT2      | 0.000326148 | 0.999673852 | 1.623410612  | 3.08843527  |
| LPIN1       | 0.00032372  | 0.99967628  | 0.658526001  | 1.580490479 |
| LPL         | 0.000322924 | 0.999677076 | -3.495276263 | 0.077326094 |
| LPO         | 0.000322245 | 0.999677755 | -2.735273614 | 0.136501217 |
| LRCH3       | 0.000321418 | 0.999678582 | 1.151171598  | 2.226650536 |
| LRG1        | 0.0003193   | 0.9996807   | -2.917200098 | 0.130224119 |
| LRMP        | 0.000319006 | 0.999680994 | 1.254999138  | 2.396148325 |
| LRP5L       | 0.000317767 | 0.999682233 | -1.566933374 | 0.33040732  |
| LRP6        | 0.000316624 | 0.999683376 | 1.32353974   | 2.503324307 |
| LRP8        | 0.000316231 | 0.999683769 | -1.640424583 | 0.320116063 |
| LRPPRC      | 0.000314985 | 0.999685015 | -1.470448179 | 0.357505224 |
| LRRC1       | 0.00031399  | 0.99968601  | 1.358351551  | 2.564145889 |
| LRRC32      | 0.000313804 | 0.999686196 | -1.069096574 | 0.475926929 |
| LRRC36      | 0.00031377  | 0.99968623  | -4.075100842 | 0.050080521 |
| LRRC37A11P  | 0.000313215 | 0.999686785 | 0.692667973  | 1.61731827  |
| LRRC37A16P  | 0.000309942 | 0.999690058 | -1.247473991 | 0.420632101 |
| LRRC37A2    | 0.000308645 | 0.999691355 | 0.583040011  | 1.499325788 |
| LRRC37A3    | 0.000308188 | 0.999691812 | -2.24463935  | 0.192923557 |
| LRRC37BP1   | 0.000307864 | 0.999692136 | 0.698839454  | 1.625605217 |
| LRRC47      | 0.000307838 | 0.999692162 | 0.704397304  | 1.630259175 |
| LRRC4C      | 0.000307488 | 0.999692512 | -0.750109646 | 0.594381068 |
| LRRC59      | 0.000306239 | 0.999693761 | 1.059338181  | 2.084325604 |
| LRRC66      | 0.000304408 | 0.999695592 | 1.938712051  | 3.869394624 |
| LRRC75A     | 0.000304336 | 0.999695664 | 4.621511701  | 26.57794384 |
| LRRC75A-AS1 | 0.000304274 | 0.999695726 | -1.626054084 | 0.323773573 |
| LRRC8C      | 0.000303261 | 0.999696739 | -1.776602034 | 0.287411816 |
| LRRCC1      | 0.000301828 | 0.999698172 | -3.549865505 | 0.079891017 |
| LRRK1       | 0.000298273 | 0.999701727 | 0.922710447  | 1.901965744 |
| LRRN1       | 0.000298004 | 0.999701996 | 1.979289118  | 4.212446154 |
| LSG1        | 0.000297502 | 0.999702498 | -1.740287647 | 0.295579679 |
| LSM10       | 0.000296521 | 0.999703479 | 1.488704788  | 2.82460508  |
| LSM11       | 0.000295461 | 0.999704539 | -1.232689757 | 0.425385203 |
| LSM12       | 0.000293066 | 0.999706934 | 1.491285671  | 2.816729199 |
| LSM2        | 0.000292821 | 0.999707179 | -0.530263137 | 0.691729123 |
| LSM3        | 0.000292756 | 0.999707244 | -1.233537055 | 0.419657785 |
| LSM4        | 0.000292716 | 0.999707284 | -1.182580209 | 0.440401559 |
| LTA4H       | 0.000288191 | 0.999711809 | -1.585920451 | 0.32200751  |
| LTB4R2      | 0.000288018 | 0.999711982 | 2.571433361  | 6.143586999 |
| LTBP2       | 0.000287356 | 0.999712644 | 1.090106964  | 2.138902754 |
| LTF         | 0.000286274 | 0.999713726 | 1.02466554   | 2.048266588 |
| LTV1        | 0.00028587  | 0.99971413  | 0.892512281  | 1.856513788 |
| LUCAT1      | 0.000284182 | 0.999715818 | -1.855268551 | 0.275607765 |
| LURAP1      | 0.000283783 | 0.999716217 | -2.914838074 | 0.13065339  |
| LURAP1L     | 0.000282523 | 0.999717477 | -1.822311051 | 0.281588938 |
| LURAP1L-AS1 | 0.000282409 | 0.999717591 | -1.518846332 | 0.348714029 |
| LUZP1       | 0.000279515 | 0.999720485 | -1.491054229 | 0.347299444 |
| LVRN        | 0.000278201 | 0.999721799 | 0.806102534  | 1.748927502 |
| LY6D        | 0.000277811 | 0.999722189 | 1.327313303  | 2.522937093 |
| LY75        | 0.000277477 | 0.999722523 | 0.60279527   | 1.52038175  |
| LYAR        | 0.000277337 | 0.999722663 | 1.674004727  | 3.225057115 |
| LYG2        | 0.000275464 | 0.999724536 | -3.365051008 | 0.076126931 |
| LYPD3       | 0.000273689 | 0.999726311 | -1.283731185 | 0.4107257   |
| LYRM4       | 0.000271727 | 0.999728273 | -2.352039525 | 0.184711252 |
| LYSMD4      | 0.000271111 | 0.999728889 | 0.667451667  | 1.588456562 |
| LYVE1       | 0.000270719 | 0.999729281 | -1.370789179 | 0.38616162  |
| LZTS1-AS1   | 0.000270644 | 0.999729356 | 1.32714617   | 2.51033588  |
| M6PR        | 0.000270255 | 0.999729745 | -2.30056241  | 0.183161788 |
| MAB21L1     | 0.000268444 | 0.999731556 | 1.301463789  | 2.466931216 |
| MACF1       | 0.000268422 | 0.999731578 | 1.156688525  | 2.24422256  |
| MACROD2     | 0.000268268 | 0.999731732 | 0.802017202  | 1.744490401 |
| MAD2L1      | 0.000267224 | 0.999732776 | 0.962643411  | 1.949037785 |
| MAD2L1BP    | 0.00026519  | 0.99973481  | -2.652500674 | 0.140302596 |
| MAF         | 0.000263596 | 0.999736404 | 1.511558243  | 2.85843867  |
| MAFB        | 0.000261792 | 0.999738208 | -1.522681251 | 0.339228748 |
| MAG11-IT1   | 0.000260418 | 0.999739582 | -1.090573376 | 0.46473171  |
| MAG12       | 0.000260262 | 0.999739738 | 0.918547591  | 1.891268107 |
| MAG13       | 0.000259575 | 0.999740425 | -0.577544544 | 0.669799021 |
| MAGOH       | 0.000257546 | 0.999742454 | 1.247576539  | 2.374770209 |
| MAK         | 0.000257043 | 0.999742957 | 1.028249427  | 2.046256689 |
| MAK16       | 0.000256483 | 0.999743517 | 0.703228092  | 1.628518642 |
| MALL        | 0.000255843 | 0.999744157 | 2.204236494  | 4.678562606 |
| MAMDC2      | 0.000255673 | 0.999744327 | 1.644452173  | 3.201220528 |
| MAMDC2-AS1  | 0.000254432 | 0.999745568 | -1.261326916 | 0.414833592 |
| MAML2       | 0.000252878 | 0.999747122 | -1.4720691   | 0.360212823 |
| MAMLD1      | 0.00025084  | 0.99974916  | 1.06531858   | 2.108300828 |
| MAOA        | 0.000250282 | 0.999749718 | 1.130016167  | 2.188722243 |
| MAOB        | 0.00024896  | 0.99975104  | -1.945694569 | 0.245308095 |
| MAP2        | 0.000248691 | 0.999751309 | 0.527933533  | 1.442651487 |
| MAP2K1      | 0.0002484   | 0.9997516   | -1.247989949 | 0.420968102 |
| MAP2K3      | 0.000248361 | 0.999751639 | 0.558309421  | 1.47340515  |
| MAP3K3      | 0.000248346 | 0.999751654 | -1.966149731 | 0.254837153 |
| MAP3K4      | 0.000247942 | 0.999752058 | -2.386034397 | 0.173768912 |
| MAP3K5      | 0.000247573 | 0.999752427 | 1.086054314  | 2.123564197 |
| MAP6D1      | 0.000246877 | 0.999753123 | -2.983396786 | 0.118507324 |

|            |             |             |              |             |
|------------|-------------|-------------|--------------|-------------|
| MAPK10     | 0.000246619 | 0.999753381 | -2.209934285 | 0.200234118 |
| MAPK12     | 0.000246198 | 0.999753802 | -1.978838658 | 0.248501041 |
| MAPK13     | 0.000245442 | 0.999754558 | -1.758079736 | 0.284168158 |
| MAPK15     | 0.000243864 | 0.999756136 | -2.623918774 | 0.162116521 |
| MAPK4      | 0.000243186 | 0.999756814 | -0.653266764 | 0.635598397 |
| MAPKAPK3   | 0.000242971 | 0.999757029 | -1.249108143 | 0.420127045 |
| MAPRE2     | 0.00024278  | 0.99975722  | 1.02179546   | 2.030625131 |
| MAPT-AS1   | 0.000242683 | 0.999757317 | -0.887163163 | 0.540482501 |
| 1-Mar      | 0.00024253  | 0.99975747  | 0.817993009  | 1.766764464 |
| 3-Mar      | 0.000242218 | 0.999757782 | -2.559425854 | 0.168842971 |
| MARS       | 0.000241753 | 0.999758247 | -1.728975073 | 0.29546591  |
| MARS2      | 0.000241679 | 0.999758321 | 0.972984936  | 1.965077273 |
| MARVELD1   | 0.000240211 | 0.999759789 | -2.358620672 | 0.181241827 |
| MASP1      | 0.000239958 | 0.999760042 | 0.932411987  | 1.917359856 |
| MASP2      | 0.000239216 | 0.999760784 | 0.723926919  | 1.65183798  |
| MAST4      | 0.000237937 | 0.999762063 | 1.477671685  | 2.811469375 |
| MAST4-AS1  | 0.000237582 | 0.999762418 | 0.890972633  | 1.854787405 |
| MATN2      | 0.000237495 | 0.999762505 | -1.464953185 | 0.35705767  |
| MATN3      | 0.000236644 | 0.999763356 | -1.151002567 | 0.449605463 |
| MAZ        | 0.000236195 | 0.999763805 | 1.584340859  | 3.00080785  |
| MB21D2     | 0.000234456 | 0.999765544 | -0.527055043 | 0.693372812 |
| MBD5       | 0.000233881 | 0.999766119 | 0.936779963  | 1.91533815  |
| MBLAC2     | 0.000233842 | 0.999766158 | -2.526349    | 0.171617883 |
| MBOAT1     | 0.000232903 | 0.999767097 | -1.282018674 | 0.408006134 |
| MCAT       | 0.000231325 | 0.999768675 | -1.040705223 | 0.485439217 |
| MCCC1      | 0.000230884 | 0.999769116 | -0.775378204 | 0.583370224 |
| MCF2L2     | 0.000230018 | 0.999769982 | -1.548825729 | 0.339665897 |
| MCIDAS     | 0.000229506 | 0.999770494 | -2.083021035 | 0.222947378 |
| MCM10      | 0.000227378 | 0.999772622 | -3.892731452 | 0.063299162 |
| MCM2       | 0.000224771 | 0.999775229 | -1.379359293 | 0.383862005 |
| MCM3       | 0.000224401 | 0.999775599 | -2.785504795 | 0.131997893 |
| MCM4       | 0.000224346 | 0.999775654 | 1.13829244   | 2.213968175 |
| MCM5       | 0.000223553 | 0.999776447 | 1.434624289  | 2.704151728 |
| MCM6       | 0.00022228  | 0.99977772  | -1.119897145 | 0.457855202 |
| MCM7       | 0.000218727 | 0.999781273 | -1.350825113 | 0.391437497 |
| MCOLN2     | 0.000218551 | 0.999781449 | 0.735225137  | 1.668957399 |
| MDFC       | 0.000218018 | 0.999781982 | 1.499486081  | 2.835920557 |
| MDH2       | 0.000217381 | 0.999782619 | -1.41213497  | 0.370510885 |
| MDN1       | 0.000217366 | 0.999782634 | -0.626022409 | 0.64778807  |
| ME1        | 0.000216872 | 0.999783128 | 0.76564752   | 1.704759571 |
| ME2        | 0.000216455 | 0.999783545 | 0.943883181  | 1.923778521 |
| MECOM      | 0.000214424 | 0.999785576 | -0.640385222 | 0.641420952 |
| MECP2      | 0.000214392 | 0.999785608 | -1.203810431 | 0.431508076 |
| MED12L     | 0.000214137 | 0.999785863 | -0.763519184 | 0.588999979 |
| MEF2C      | 0.000211583 | 0.999788417 | 1.284035257  | 2.440030677 |
| MEGF10     | 0.000209541 | 0.999790459 | 0.990247566  | 1.986883593 |
| MEGF9      | 0.000209331 | 0.999790669 | -1.52026931  | 0.348472998 |
| MEI4       | 0.000209303 | 0.999790697 | -2.458549477 | 0.178748352 |
| MERTK      | 0.000209206 | 0.999790794 | 1.523714683  | 2.939810663 |
| METAP2     | 0.000208117 | 0.999791883 | 0.562979394  | 1.477630907 |
| METTL1     | 0.000204666 | 0.999795334 | -1.168717954 | 0.438771802 |
| METTL12    | 0.000203957 | 0.999796043 | 0.548513042  | 1.462714268 |
| METTL13    | 0.000200764 | 0.999799236 | -0.952286883 | 0.515760788 |
| METTL20    | 0.000199477 | 0.999800523 | -2.947061069 | 0.111865915 |
| METTL8     | 0.000198122 | 0.999801878 | -3.469612686 | 0.089975264 |
| MEX3B      | 0.000195562 | 0.999804438 | 1.060758938  | 2.08660324  |
| MFAP5      | 0.000194866 | 0.999805134 | -1.022150366 | 0.489382932 |
| MFN2       | 0.00019425  | 0.99980575  | -5.52883746  | 0.017124163 |
| MFS2A      | 0.000194157 | 0.999805843 | -0.833480522 | 0.561133847 |
| MFS4       | 0.000193592 | 0.999806408 | 0.872537719  | 1.840593449 |
| MGAT4A     | 0.000193347 | 0.999806653 | 0.969639066  | 1.959011441 |
| MGAT5      | 0.000192767 | 0.999807233 | 0.674116845  | 1.598208949 |
| MGC39584   | 0.000192509 | 0.999807491 | -1.524611909 | 0.344768297 |
| MGP        | 0.000192443 | 0.999807557 | -2.073929521 | 0.231265941 |
| MIA        | 0.000191854 | 0.999808146 | -3.156412998 | 0.109196014 |
| MICE       | 0.000191056 | 0.999808944 | -1.328908463 | 0.397914279 |
| MID1P1     | 0.000190805 | 0.999809195 | -3.278621694 | 0.098374908 |
| MIEF1      | 0.000189566 | 0.999810434 | 0.938000466  | 1.917075304 |
| MIEF1      | 0.000189043 | 0.999810957 | -4.043146348 | 0.04931916  |
| MINA       | 0.000188538 | 0.999811462 | 1.966799565  | 3.912692216 |
| MINCR      | 0.000188321 | 0.999811679 | 0.560770792  | 1.475156483 |
| MIPPEP     | 0.000187393 | 0.999812607 | 0.876850428  | 1.837624428 |
| MIR1284    | 0.000187324 | 0.999812676 | -0.646628275 | 0.638190959 |
| MIR17HG    | 0.00018695  | 0.99981305  | -2.323306171 | 0.195468908 |
| MIR181A1HG | 0.000186406 | 0.999813594 | -1.095005424 | 0.467850001 |
| MIR193BHG  | 0.00018558  | 0.999814442 | -2.158847638 | 0.201174178 |
| MIR205HG   | 0.000185117 | 0.999814883 | 0.897765904  | 1.866641678 |
| MIR27B     | 0.000184935 | 0.999815065 | -2.840570795 | 0.123569899 |
| MIR30A     | 0.000184913 | 0.999815087 | 0.818262457  | 1.764361189 |
| MIR30C2    | 0.000184316 | 0.999815684 | -1.122961938 | 0.457219814 |
| MIR34AHG   | 0.000182786 | 0.999817214 | -2.663939449 | 0.134698788 |
| MIR3936    | 0.000181539 | 0.999818461 | -1.659250524 | 0.311320782 |
| MIR4319    | 0.00018093  | 0.99981907  | -2.996163615 | 0.106633959 |
| MIR4459    | 0.000179629 | 0.999820371 | -0.917120402 | 0.528845895 |
| MIR5190    | 0.000179353 | 0.999820647 | -2.014839312 | 0.24248941  |
| MIR548H1   | 0.00017775  | 0.99982225  | -2.100920486 | 0.229297298 |
| MIR568     | 0.000177638 | 0.999822362 | -2.481637834 | 0.178735876 |
| MIR5706    | 0.000177318 | 0.999822682 | -2.233704827 | 0.204389186 |
| MIR802     | 0.000177044 | 0.999822956 | -2.315915401 | 0.186885241 |
| MIR99AHG   | 0.000173889 | 0.999826111 | 1.271032164  | 2.416310837 |
| MIS18A     | 0.000173278 | 0.999826722 | -1.916131044 | 0.25686679  |
| MKI67      | 0.00017267  | 0.99982733  | 1.917622372  | 3.83019717  |
| MKL1       | 0.000172599 | 0.999827401 | -1.548345797 | 0.332433774 |

|           |             |             |              |             |
|-----------|-------------|-------------|--------------|-------------|
| MKNK2     | 0.000172061 | 0.999827939 | -0.560786402 | 0.677905559 |
| MKRN20S   | 0.000170519 | 0.999829481 | 0.824151051  | 1.770989632 |
| MKRN5P    | 0.000169966 | 0.999830034 | 1.016072607  | 2.022931111 |
| MLF2      | 0.000169634 | 0.999830366 | 0.873325873  | 1.839427479 |
| MLIP      | 0.00016925  | 0.99983075  | -0.685410473 | 0.620394136 |
| MLIP-AS1  | 0.000168876 | 0.999831124 | -2.476194845 | 0.157806543 |
| MLIP-IT1  | 0.000168858 | 0.999831142 | 1.062988273  | 2.089888161 |
| MLLT4     | 0.000168673 | 0.999831327 | -1.379159478 | 0.384020818 |
| MLLT4-AS1 | 0.000167968 | 0.999832032 | -2.484660436 | 0.176803648 |
| MLST8     | 0.000167548 | 0.999832452 | -1.448549068 | 0.365661515 |
| MLX       | 0.000166609 | 0.999833391 | 1.687150215  | 3.263867902 |
| MMACHC    | 0.00016648  | 0.99983352  | -3.140535141 | 0.110455399 |
| MME       | 0.000166281 | 0.999833719 | -1.181908915 | 0.439722442 |
| MMP13     | 0.000165625 | 0.999834375 | 1.365234232  | 2.577990421 |
| MMP17     | 0.000165465 | 0.999834535 | 1.667259486  | 3.243651228 |
| MMP19     | 0.000164705 | 0.999835295 | 0.746063972  | 1.678193393 |
| MMP2      | 0.000164014 | 0.999835986 | 1.048094734  | 2.069310951 |
| MMP20     | 0.000163964 | 0.999836036 | -2.370140094 | 0.174488099 |
| MMP24-AS1 | 0.000163758 | 0.999836242 | 1.497007426  | 2.828639219 |
| MMP25     | 0.000162262 | 0.999837738 | -1.139268809 | 0.45366897  |
| MMP27     | 0.00016202  | 0.99983798  | -2.166104087 | 0.200455713 |
| MMP28     | 0.000161301 | 0.999838699 | -2.115299073 | 0.218384086 |
| MMP7      | 0.000160445 | 0.999839555 | 0.533449205  | 1.447618907 |
| MMRN2     | 0.000160105 | 0.999839895 | 0.63632041   | 1.556963043 |
| MMS19     | 0.000156492 | 0.999843508 | 0.951214185  | 1.934501123 |
| MN1       | 0.00015584  | 0.99984416  | 1.252827625  | 2.387554735 |
| MNT       | 0.000155713 | 0.999844287 | 0.585641045  | 1.502699614 |
| MOAP1     | 0.000154889 | 0.999845111 | -2.284190708 | 0.197915111 |
| MOB3B     | 0.000154856 | 0.999845144 | 1.321966601  | 2.500585835 |
| MOB3C     | 0.000154543 | 0.999845457 | -3.128394633 | 0.110236146 |
| MOCOS     | 0.000154136 | 0.999845864 | -1.338514499 | 0.388438465 |
| MOGAT2    | 0.000154032 | 0.999845968 | 1.211864049  | 2.317251751 |
| MON1A     | 0.00015395  | 0.99984605  | -1.466860386 | 0.356293446 |
| MOV10L1   | 0.000153389 | 0.999846611 | 1.41400959   | 2.67864921  |
| MOXD1     | 0.000152672 | 0.999847328 | 0.634286401  | 1.553510824 |
| MPC1      | 0.000151312 | 0.999848688 | 0.854880706  | 1.808831521 |
| MPDU1     | 0.000151086 | 0.999848914 | 0.71997798   | 1.647768864 |
| MPI       | 0.000151016 | 0.999848984 | -2.6513145   | 0.153476028 |
| MPP3      | 0.000150262 | 0.999849738 | -1.174115806 | 0.442957887 |
| MPP6      | 0.000150238 | 0.999849762 | 0.663457731  | 1.584321511 |
| MPV17     | 0.000148599 | 0.999851401 | -1.494844627 | 0.348607045 |
| MPZ       | 0.000148338 | 0.999851662 | -1.566244737 | 0.335984525 |
| MR1       | 0.000147463 | 0.999852537 | 2.293667251  | 4.927983044 |
| MRGBP     | 0.000145908 | 0.999854092 | 0.975411327  | 1.977517249 |
| MRM1      | 0.000145816 | 0.999854184 | 2.7498055    | 7.501493684 |
| MROH7     | 0.000144904 | 0.999855096 | 0.794002289  | 1.734325513 |
| MRPL10    | 0.000144899 | 0.999855101 | 1.157259265  | 2.231641325 |
| MRPL11    | 0.000144551 | 0.999855449 | 1.318721761  | 2.495464671 |
| MRPL14    | 0.000144403 | 0.999855597 | 0.835074721  | 1.790105764 |
| MRPL15    | 0.00014334  | 0.99985666  | -2.489269251 | 0.168817315 |
| MRPL16    | 0.000142401 | 0.999857599 | -1.379230291 | 0.383839394 |
| MRPL17    | 0.000142164 | 0.999857836 | -0.69009007  | 0.619570416 |
| MRPL18    | 0.000141586 | 0.999858414 | 0.555524703  | 1.470410398 |
| MRPL2     | 0.000141029 | 0.999858971 | 1.078035524  | 2.111396064 |
| MRPL20    | 0.000140435 | 0.999859565 | -0.875967132 | 0.541848746 |
| MRPL21    | 0.000140178 | 0.999859822 | -2.856545537 | 0.098541628 |
| MRPL22    | 0.000140121 | 0.999859879 | 1.079170047  | 2.113857464 |
| MRPL23    | 0.000137116 | 0.999862884 | -1.679864978 | 0.301211044 |
| MRPL24    | 0.000136255 | 0.999863745 | -2.122856083 | 0.223173003 |
| MRPL27    | 0.000135608 | 0.999864392 | 0.72505705   | 1.653289857 |
| MRPL28    | 0.000135479 | 0.999864521 | -1.249245865 | 0.420324909 |
| MRPL3     | 0.000135062 | 0.999864938 | -0.980181332 | 0.506122633 |
| MRPL30    | 0.000134929 | 0.999865071 | -1.459511671 | 0.356008249 |
| MRPL32    | 0.000134222 | 0.999865778 | 0.596577965  | 1.512362575 |
| MRPL34    | 0.000134094 | 0.999865906 | 0.791327228  | 1.732116895 |
| MRPL36    | 0.000132433 | 0.999867567 | -1.521784522 | 0.348085706 |
| MRPL37    | 0.000131813 | 0.999868187 | -1.744306884 | 0.297943034 |
| MRPL39    | 0.000130622 | 0.999869378 | -0.947281194 | 0.518286779 |
| MRPL4     | 0.0001301   | 0.9998699   | 1.023300965  | 2.03346715  |
| MRPL40    | 0.00012989  | 0.99987011  | 1.673679683  | 3.204164064 |
| MRPL42    | 0.00012895  | 0.99987105  | -2.218872984 | 0.21055704  |
| MRPL43    | 0.000128512 | 0.999871488 | 0.580962903  | 1.496017485 |
| MRPL44    | 0.000128086 | 0.999871914 | 1.180584172  | 2.268804385 |
| MRPL45    | 0.000127944 | 0.999872056 | -1.261423373 | 0.41527157  |
| MRPL47    | 0.000127752 | 0.999872248 | -3.405130468 | 0.065578541 |
| MRPL50    | 0.000127036 | 0.999872964 | 0.617711997  | 1.53532418  |
| MRPL51    | 0.000125537 | 0.999874463 | -2.568391074 | 0.157593203 |
| MRPL54    | 0.00012487  | 0.99987513  | 1.250863963  | 2.380482739 |
| MRPL55    | 0.000124737 | 0.999875263 | 1.11079752   | 2.162839945 |
| MRPL57    | 0.000124714 | 0.999875286 | -1.704659709 | 0.306562574 |
| MRPL9     | 0.00012453  | 0.99987547  | -0.770080457 | 0.585757095 |
| MRPS11    | 0.00012434  | 0.99987566  | 0.922117976  | 1.898072588 |
| MRPS12    | 0.000124329 | 0.999875671 | -1.654285969 | 0.308819122 |
| MRPS15    | 0.000123867 | 0.999876133 | -1.287227094 | 0.406519677 |
| MRPS16    | 0.000123026 | 0.999876974 | 0.695248549  | 1.621065303 |
| MRPS17    | 0.000122173 | 0.999877827 | 1.333685886  | 2.529834205 |
| MRPS18A   | 0.000122124 | 0.999877876 | -3.318999242 | 0.062522638 |
| MRPS18B   | 0.000121567 | 0.999878433 | 0.688365011  | 1.612264569 |
| MRPS2     | 0.000121246 | 0.999878754 | -3.133870208 | 0.107943759 |
| MRPS21    | 0.000121186 | 0.999878814 | -1.081338812 | 0.468646619 |
| MRPS23    | 0.000120865 | 0.999879135 | -3.909018343 | 0.038063357 |
| MRPS25    | 0.000120858 | 0.999879142 | 0.731696804  | 1.661315999 |
| MRPS26    | 0.00011891  | 0.99988109  | 1.018487045  | 2.026398693 |

|              |             |             |              |             |
|--------------|-------------|-------------|--------------|-------------|
| MRPS27       | 0.00011738  | 0.99988262  | -3.182429001 | 0.104739897 |
| MRPS33       | 0.00011686  | 0.99988314  | 1.778346574  | 3.460594753 |
| MRPS34       | 0.000116743 | 0.999883257 | -0.995349116 | 0.501024395 |
| MRPS35       | 0.000116312 | 0.999883688 | -1.995689849 | 0.23819616  |
| MRPS5        | 0.000115759 | 0.999884241 | -1.491296271 | 0.351317191 |
| MRPS7        | 0.000115627 | 0.999884373 | -0.716520328 | 0.607831289 |
| MRPS9        | 0.000114644 | 0.999885356 | 0.916355896  | 1.888075468 |
| MRRF         | 0.000114504 | 0.999885496 | 0.741396036  | 1.672005761 |
| MRS2         | 0.000114338 | 0.999885662 | 0.639712673  | 1.558356159 |
| MRT04        | 0.000114034 | 0.999885966 | -1.506945264 | 0.350973089 |
| MRV1         | 0.000113659 | 0.999886341 | -2.839012602 | 0.124812213 |
| MSH5         | 0.000113591 | 0.999886409 | -0.713156147 | 0.608521014 |
| MSLN         | 0.000113531 | 0.999886469 | 3.44305786   | 11.49734536 |
| MSRB3        | 0.000112899 | 0.999887101 | -3.994641847 | 0.050891536 |
| MST01        | 0.000112452 | 0.999887548 | 0.79586844   | 1.736435787 |
| MT1E         | 0.000112427 | 0.999887573 | -2.698671559 | 0.148323456 |
| MT1F         | 0.000112098 | 0.999887902 | -2.210158052 | 0.216065467 |
| MTA1         | 0.000111232 | 0.999888768 | 1.055696865  | 2.078956495 |
| MTA2         | 0.000110616 | 0.999889384 | -1.45216133  | 0.364712185 |
| MTCH2        | 0.000110011 | 0.999889989 | -0.726758378 | 0.602570948 |
| MT-C02       | 0.000109963 | 0.999890037 | -1.091257013 | 0.468193869 |
| MT-C03       | 0.0001096   | 0.99989004  | -2.030439867 | 0.243569398 |
| MTFMT        | 0.000109506 | 0.999890494 | 0.960807453  | 1.94672268  |
| MTRR2        | 0.000109404 | 0.999890596 | 0.812901021  | 1.761926862 |
| MTHFD1       | 0.000109032 | 0.999890968 | -2.813244578 | 0.136306764 |
| MTHFD1L      | 0.00010865  | 0.99989135  | -2.021279584 | 0.246037869 |
| MTHFD2       | 0.000108159 | 0.999891841 | 1.486433737  | 2.820318526 |
| MTIF2        | 0.000108087 | 0.999891913 | 1.230059434  | 2.349651868 |
| MTMR10       | 0.000107703 | 0.999892297 | -0.670060328 | 0.627892794 |
| MTMR11       | 0.000107582 | 0.999892418 | -1.015109762 | 0.494673668 |
| MTMR4        | 0.000107221 | 0.999892779 | -3.223208651 | 0.104429304 |
| MTND1P21     | 0.000107175 | 0.999892825 | -1.861072613 | 0.275126887 |
| MTND2P5      | 0.000107126 | 0.999892874 | 1.784266847  | 3.544634176 |
| MTNDS5P28    | 0.000106811 | 0.999893189 | -1.980193592 | 0.237725451 |
| MTOR         | 0.000106657 | 0.999893343 | 1.697284343  | 3.299285535 |
| MTPAP        | 0.000106546 | 0.999893454 | -1.116673719 | 0.461098145 |
| MTRNR2L8     | 0.000106468 | 0.999893532 | -2.225458505 | 0.197950557 |
| MTRR         | 0.000106284 | 0.999893716 | 0.641957567  | 1.561647564 |
| MTSS1        | 0.000105992 | 0.999894008 | -1.367128588 | 0.385651887 |
| MTX1         | 0.00010571  | 0.99989429  | -1.67293046  | 0.311440067 |
| MUCL1        | 0.000105698 | 0.999894302 | -1.359575225 | 0.389576867 |
| MUM1         | 0.000105473 | 0.999894527 | -0.701112362 | 0.614622723 |
| MVB12B       | 0.000104956 | 0.999895044 | -1.390109143 | 0.378600153 |
| MX1          | 0.00010482  | 0.99989518  | -0.525485344 | 0.694027677 |
| MX2          | 0.000104749 | 0.999895251 | -1.226651376 | 0.427040247 |
| MXD1         | 0.000104728 | 0.999895272 | 1.615254725  | 3.086108812 |
| MYBBP1A      | 0.000104565 | 0.999895435 | -1.44144727  | 0.367975135 |
| MYBL2        | 0.000104439 | 0.999895561 | -1.719981659 | 0.29651182  |
| MYBPC1       | 0.000104255 | 0.999895745 | 1.301439319  | 2.468767298 |
| MYBPC2       | 0.000102396 | 0.999897604 | -1.274493277 | 0.412942202 |
| MYBPHL       | 0.000101746 | 0.999898254 | -0.746559617 | 0.595716789 |
| MYC          | 0.000101597 | 0.999898403 | 0.854326245  | 1.809259561 |
| MYCL         | 0.000101229 | 0.999898771 | -1.844385745 | 0.2765777   |
| MYDGF        | 0.000100935 | 0.999899065 | -2.528712736 | 0.17217608  |
| MYEF2        | 0.000100835 | 0.999899165 | -1.790125594 | 0.278264085 |
| MYEOV        | 9.98E-05    | 0.999900206 | -2.677535527 | 0.149428438 |
| MYEOV2       | 9.87E-05    | 0.999901269 | 0.985229987  | 1.983303997 |
| MYH11        | 9.86E-05    | 0.999901432 | -1.541709692 | 0.342719626 |
| MYH3         | 9.86E-05    | 0.999901445 | 2.031593457  | 4.126242393 |
| MYLK         | 9.84E-05    | 0.999901635 | 1.795735667  | 3.518174924 |
| MYLK-AS2     | 9.82E-05    | 0.999901805 | -2.134436296 | 0.219232135 |
| MYO5A        | 9.82E-05    | 0.999901842 | -1.517739731 | 0.348468331 |
| MYOF         | 9.74E-05    | 0.999902637 | -0.642749804 | 0.640040603 |
| MYOM1        | 9.73E-05    | 0.999902678 | 0.975236543  | 1.968199408 |
| MYZAP        | 9.73E-05    | 0.999902704 | 0.953227055  | 1.936788443 |
| MZT1         | 9.67E-05    | 0.99990326  | -0.774590314 | 0.582706195 |
| MZT2B        | 9.66E-05    | 0.999903372 | -1.602804388 | 0.325631592 |
| N4BP1        | 9.65E-05    | 0.99990345  | -2.95451352  | 0.100228901 |
| N4BP2L1      | 9.65E-05    | 0.999903507 | -2.476681538 | 0.178505318 |
| N6AMT2       | 9.65E-05    | 0.999903541 | 1.28334179   | 2.451800977 |
| NAA10        | 9.52E-05    | 0.999904821 | 0.80414523   | 1.747145958 |
| NAA20        | 9.52E-05    | 0.999904822 | 1.847970683  | 3.805722839 |
| NAA25        | 9.48E-05    | 0.999905243 | -3.649106312 | 0.07083665  |
| NAA40        | 9.45E-05    | 0.999905468 | -0.778098005 | 0.582913922 |
| NAALADL2     | 9.42E-05    | 0.999905762 | 0.602267494  | 1.518862269 |
| NAALADL2-AS3 | 9.42E-05    | 0.999905797 | 1.026463987  | 2.039159933 |
| NABP2        | 9.39E-05    | 0.999906078 | 0.855972837  | 1.817746508 |
| NACA         | 9.33E-05    | 0.999906743 | -1.17627333  | 0.440433996 |
| NAE1         | 9.21E-05    | 0.999907918 | -0.716672625 | 0.608403604 |
| NAGK         | 9.18E-05    | 0.999908188 | 0.836576939  | 1.786041297 |
| NAP1L1       | 9.13E-05    | 0.999908666 | -0.936369649 | 0.521249731 |
| NARS         | 9.09E-05    | 0.999909138 | 1.100252414  | 2.144338879 |
| NARS2        | 9.08E-05    | 0.99990921  | -2.09266128  | 0.216941083 |
| NAT10        | 9.01E-05    | 0.999909901 | 1.171780076  | 2.253515402 |
| NAT9         | 8.99E-05    | 0.999910082 | 1.198703341  | 2.295958394 |
| NAV1         | 8.88E-05    | 0.999911188 | 1.470000809  | 2.790831303 |
| NAV2         | 8.76E-05    | 0.999912439 | -1.820977871 | 0.280213118 |
| NAV2-AS2     | 8.74E-05    | 0.999912597 | -1.213761822 | 0.431056525 |
| NAV2-AS3     | 8.74E-05    | 0.999912649 | 1.34175469   | 2.536709407 |
| NAV3         | 8.70E-05    | 0.99991295  | 0.866464387  | 1.824549713 |
| NBAT1        | 8.65E-05    | 0.999913518 | 1.805996867  | 3.508059358 |
| NBEA         | 8.62E-05    | 0.999913831 | -2.707970072 | 0.148324205 |
| NBEAP1       | 8.56E-05    | 0.999914419 | 0.52557022   | 1.440082005 |

|            |          |             |              |             |
|------------|----------|-------------|--------------|-------------|
| NBR2       | 8.54E-05 | 0.999914625 | 1.370569374  | 2.586762665 |
| NCALD      | 8.47E-05 | 0.999915254 | 1.055163648  | 2.07957978  |
| NCAPD2     | 8.41E-05 | 0.999915919 | -1.2610503   | 0.417089612 |
| NCAPD3     | 8.33E-05 | 0.999916742 | -1.883990441 | 0.26749697  |
| NCAPG2     | 8.30E-05 | 0.999917044 | -2.361329735 | 0.174994906 |
| NCAPH      | 8.29E-05 | 0.999917108 | -2.708759799 | 0.134630168 |
| NCBP2-AS2  | 8.26E-05 | 0.999917435 | -2.469630556 | 0.180367983 |
| NCEH1      | 8.22E-05 | 0.999917753 | -1.044055042 | 0.484709553 |
| NCK2       | 8.20E-05 | 0.999917986 | -2.933834857 | 0.119693106 |
| NCKAP1L    | 8.19E-05 | 0.999918132 | -2.118502623 | 0.224063154 |
| NCKAP5     | 8.14E-05 | 0.999918609 | -4.365766772 | 0.043699297 |
| NCL        | 7.98E-05 | 0.999920246 | -2.158211749 | 0.223050866 |
| NCOA1      | 7.97E-05 | 0.999920285 | 0.755197213  | 1.689924543 |
| NCR3LG1    | 7.95E-05 | 0.999920504 | -3.870339966 | 0.055255128 |
| NCS1       | 7.94E-05 | 0.999920585 | 0.704844475  | 1.632242856 |
| NDC1       | 7.93E-05 | 0.999920664 | 0.996797139  | 2.006356561 |
| NDRG1      | 7.89E-05 | 0.999921052 | 1.66653622   | 3.181372356 |
| NDRG2      | 7.83E-05 | 0.99992175  | 1.571908802  | 2.976011537 |
| NDRG4      | 7.81E-05 | 0.999921872 | -2.413872704 | 0.185703127 |
| NDST3      | 7.80E-05 | 0.999922028 | 1.229424066  | 2.34535372  |
| NDUFA1     | 7.78E-05 | 0.999922201 | -0.555237554 | 0.680269482 |
| NDUFA10    | 7.73E-05 | 0.999922711 | 1.188142725  | 2.279821951 |
| NDUFA2     | 7.70E-05 | 0.999922964 | 0.875925565  | 1.837027033 |
| NDUFA6-AS1 | 7.67E-05 | 0.999923256 | -1.81498777  | 0.281993221 |
| NDUFA8     | 7.66E-05 | 0.999923445 | 1.019411402  | 2.027852235 |
| NDUFAF2    | 7.64E-05 | 0.999923644 | -1.526532501 | 0.344020997 |
| NDUFAF3    | 7.63E-05 | 0.999923657 | -1.430147388 | 0.369389435 |
| NDUFAF4    | 7.61E-05 | 0.999923918 | 0.709977906  | 1.636751396 |
| NDUFB10    | 7.54E-05 | 0.999924649 | -0.82028395  | 0.565876925 |
| NDUFB11    | 7.49E-05 | 0.999925127 | -3.427919921 | 0.087116418 |
| NDUFB4     | 7.47E-05 | 0.999925328 | -0.977997111 | 0.507024275 |
| NDUFB9     | 7.41E-05 | 0.999925946 | -1.047506671 | 0.483790703 |
| NDUFS2     | 7.36E-05 | 0.999926363 | -2.94992045  | 0.104708932 |
| NDUFS3     | 7.36E-05 | 0.9999264   | 1.095099091  | 2.138902215 |
| NDUFS5     | 7.34E-05 | 0.999926553 | -1.697307647 | 0.305379993 |
| NDUFS6     | 7.31E-05 | 0.999926903 | -2.587404269 | 0.162590512 |
| NDUFV3     | 7.28E-05 | 0.99992724  | 1.06969837   | 2.100172042 |
| NEAT1      | 7.27E-05 | 0.999927251 | -2.200267141 | 0.217485485 |
| NEBL       | 7.26E-05 | 0.999927416 | -1.809647845 | 0.280684329 |
| NEDD9      | 7.25E-05 | 0.999927486 | 0.752435622  | 1.68773466  |
| NEIL2      | 7.18E-05 | 0.999928235 | 0.527859062  | 1.442497396 |
| NEIL3      | 7.16E-05 | 0.999928422 | -2.806664515 | 0.126016792 |
| NEK11      | 7.12E-05 | 0.9999288   | 1.021072796  | 2.029708895 |
| NEK2       | 7.11E-05 | 0.999928867 | 0.557454823  | 1.472126765 |
| NEK6       | 7.11E-05 | 0.999928928 | 0.822540562  | 1.772486341 |
| NELFCD     | 7.04E-05 | 0.999929602 | 0.692750218  | 1.616893709 |
| NELFE      | 6.99E-05 | 0.999930058 | -0.943287297 | 0.519722174 |
| NEO1       | 6.97E-05 | 0.999930267 | -2.618056782 | 0.162464163 |
| NEU3       | 6.95E-05 | 0.999930475 | -3.785683464 | 0.058175719 |
| NEURL1B    | 6.88E-05 | 0.999931155 | 2.132865735  | 4.415115181 |
| NEURL3     | 6.88E-05 | 0.999931217 | 0.976048141  | 1.967837838 |
| NF1P1      | 6.79E-05 | 0.999932064 | -1.384321183 | 0.381976402 |
| NFAT5      | 6.75E-05 | 0.999932514 | -1.702961116 | 0.307017122 |
| NFATC2     | 6.75E-05 | 0.999932535 | -2.047771525 | 0.241808798 |
| NFKBIZ     | 6.73E-05 | 0.999932662 | -1.753973844 | 0.292203465 |
| NFS1       | 6.73E-05 | 0.999932676 | 0.614719192  | 1.532159487 |
| NGDN       | 6.72E-05 | 0.99993279  | -2.700932184 | 0.148213535 |
| NGRN       | 6.71E-05 | 0.999932945 | -1.890970607 | 0.263318388 |
| NHP2       | 6.66E-05 | 0.999933417 | 0.983228117  | 1.978807155 |
| NHS        | 6.59E-05 | 0.999934124 | -2.510513619 | 0.166332889 |
| NICN1      | 6.57E-05 | 0.999934328 | -0.563420199 | 0.676645702 |
| NIF3L1     | 6.57E-05 | 0.99993433  | 1.279170945  | 2.430240547 |
| NIFK       | 6.56E-05 | 0.999934437 | -1.3469564   | 0.390222634 |
| NINJ2      | 6.56E-05 | 0.999934449 | 1.461406252  | 2.759632789 |
| NIP7       | 6.55E-05 | 0.999934507 | 1.877761116  | 3.866332246 |
| NIPA2      | 6.53E-05 | 0.999934653 | -1.576168642 | 0.325795862 |
| NIPSNAP1   | 6.53E-05 | 0.999934673 | 1.312393135  | 2.485027034 |
| NKAPP1     | 6.51E-05 | 0.999934921 | 0.658507038  | 1.578992738 |
| NKILA      | 6.49E-05 | 0.999935084 | 1.35254487   | 2.560995318 |
| NKX3-1     | 6.49E-05 | 0.999935097 | 0.980821729  | 1.974623586 |
| NKX3-2     | 6.42E-05 | 0.999935776 | 1.000475412  | 2.004172297 |
| NLE1       | 6.35E-05 | 0.999936481 | 1.75614208   | 3.393075887 |
| NLGN2      | 6.34E-05 | 0.999936571 | 0.575885336  | 1.490968172 |
| NLGN4X     | 6.34E-05 | 0.999936609 | -1.918140976 | 0.261791321 |
| NLN        | 6.31E-05 | 0.999936873 | 0.987985694  | 1.984158924 |
| NLRP1      | 6.30E-05 | 0.999936984 | -2.101266528 | 0.227101824 |
| NMB        | 6.29E-05 | 0.999937053 | -5.31595553  | 0.022428978 |
| NME1       | 6.22E-05 | 0.99993783  | 1.194311414  | 2.2887799   |
| NME2       | 6.16E-05 | 0.999938423 | 0.740301832  | 1.671485864 |
| NME4       | 6.15E-05 | 0.999938548 | 0.975803415  | 1.979077418 |
| NMNA1P1    | 6.14E-05 | 0.999938623 | -3.441959048 | 0.074465399 |
| NMNA2      | 6.12E-05 | 0.999938825 | -2.027658634 | 0.240374593 |
| NMT2       | 6.12E-05 | 0.999938837 | -1.246331848 | 0.42108722  |
| NMU        | 6.09E-05 | 0.999939064 | -1.821525762 | 0.282070236 |
| NNMT       | 6.07E-05 | 0.999939338 | -0.602695772 | 0.657444768 |
| NOA1       | 6.03E-05 | 0.999939685 | -2.894531801 | 0.123646895 |
| NOB1       | 5.99E-05 | 0.999940073 | -2.994652652 | 0.113267724 |
| NOC2L      | 5.96E-05 | 0.999940367 | -1.883290987 | 0.259300796 |
| NOC4L      | 5.94E-05 | 0.999940571 | 1.742634962  | 3.367545507 |
| NOL10      | 5.89E-05 | 0.99994111  | 1.000867579  | 2.011842735 |
| NOL6       | 5.86E-05 | 0.999941436 | -0.933460751 | 0.522044019 |
| NOL9       | 5.81E-05 | 0.999941901 | -0.619771929 | 0.650417621 |
| NOLC1      | 5.74E-05 | 0.999942584 | -1.299310822 | 0.405962847 |

|           |          |             |              |             |
|-----------|----------|-------------|--------------|-------------|
| NOM1      | 5.74E-05 | 0.999942641 | -1.95650836  | 0.246446111 |
| NOM01     | 5.72E-05 | 0.999942806 | -0.834563212 | 0.560671338 |
| NOMO2     | 5.63E-05 | 0.999943722 | -2.467390849 | 0.179194999 |
| NOMO3     | 5.62E-05 | 0.999943791 | 1.446580364  | 2.747385628 |
| NONO      | 5.61E-05 | 0.99994387  | 1.160695455  | 2.238584621 |
| NOP10     | 5.57E-05 | 0.999944302 | 1.169355187  | 2.250896279 |
| NOP14     | 5.56E-05 | 0.999944419 | -0.70431468  | 0.613277972 |
| NOP16     | 5.51E-05 | 0.999944904 | -2.433620601 | 0.183678945 |
| NOP2      | 5.50E-05 | 0.999944957 | -1.687752205 | 0.303265035 |
| NOP56     | 5.50E-05 | 0.999945003 | -1.347934796 | 0.389837857 |
| NOP58     | 5.48E-05 | 0.999945192 | 0.781058426  | 1.718911332 |
| NOP9      | 5.48E-05 | 0.999945199 | -1.318278286 | 0.399571296 |
| NOS3      | 5.43E-05 | 0.999945727 | 1.136220711  | 2.214221223 |
| NOTCH4    | 5.41E-05 | 0.999945944 | -1.165199977 | 0.441033967 |
| NOTUM     | 5.38E-05 | 0.999946162 | -3.386151349 | 0.075749702 |
| NOV       | 5.36E-05 | 0.999946405 | -0.652119059 | 0.635495034 |
| NOVA1     | 5.35E-05 | 0.999946542 | 1.157321231  | 2.230671954 |
| NPAS2     | 5.33E-05 | 0.999946703 | 0.815437772  | 1.763044945 |
| NPC2      | 5.32E-05 | 0.999946785 | 1.106267912  | 2.156547485 |
| NPFFR1    | 5.30E-05 | 0.99994702  | -0.763202749 | 0.58887396  |
| NPHP3     | 5.27E-05 | 0.999947286 | 0.923477506  | 1.898621119 |
| NPHS2     | 5.27E-05 | 0.999947337 | -2.133277667 | 0.226548664 |
| NPM1      | 5.22E-05 | 0.999947785 | -0.94570743  | 0.518106155 |
| NPM1P27   | 5.20E-05 | 0.999947995 | 1.066013967  | 2.093711808 |
| NPM1P30   | 5.18E-05 | 0.999948186 | -0.91503953  | 0.527968852 |
| NPM1P41   | 5.13E-05 | 0.99994871  | -2.627314092 | 0.141143029 |
| NPM3      | 5.10E-05 | 0.99994898  | -1.240944781 | 0.422939202 |
| NPNT      | 5.06E-05 | 0.999949387 | 1.10622882   | 2.158418924 |
| NPR2      | 5.04E-05 | 0.999949632 | -0.899421219 | 0.535960171 |
| NPR3      | 5.02E-05 | 0.999949778 | -2.05310029  | 0.230849855 |
| NPRL2     | 4.94E-05 | 0.99995057  | -2.02785126  | 0.24328296  |
| NPTXR     | 4.91E-05 | 0.999950923 | 0.716040905  | 1.645000972 |
| NPY1R     | 4.90E-05 | 0.999950953 | -2.932849401 | 0.127875815 |
| NR1H3     | 4.90E-05 | 0.999950975 | 0.791075095  | 1.731016259 |
| NR1H4     | 4.90E-05 | 0.999950985 | -1.827965761 | 0.281291389 |
| NR2C2AP   | 4.82E-05 | 0.999951801 | 0.759856824  | 1.693750141 |
| NR2F1-AS1 | 4.79E-05 | 0.999952079 | -1.97903106  | 0.241959824 |
| NR2F2-AS1 | 4.79E-05 | 0.999952128 | -0.846129866 | 0.555098704 |
| NR3C2     | 4.78E-05 | 0.999952184 | -1.457827205 | 0.355888921 |
| NRARP     | 4.78E-05 | 0.999952186 | -0.991581151 | 0.500471314 |
| NRG4      | 4.76E-05 | 0.999952353 | -0.572429347 | 0.672363507 |
| NRM       | 4.76E-05 | 0.99995239  | 1.997756747  | 4.110952518 |
| NSA2      | 4.73E-05 | 0.99995265  | 0.855556377  | 1.811060863 |
| NSDHL     | 4.71E-05 | 0.999952865 | -0.877980028 | 0.542122529 |
| NSMCE1    | 4.70E-05 | 0.999952964 | 0.788317284  | 1.73029324  |
| NSMF      | 4.70E-05 | 0.999952965 | 0.95412923   | 1.938963582 |
| NSUN2     | 4.69E-05 | 0.999953087 | -0.646896758 | 0.637701924 |
| NSUN5     | 4.69E-05 | 0.999953124 | -1.788586867 | 0.281620628 |
| NTSC3B    | 4.66E-05 | 0.999953352 | 1.019988923  | 2.031507098 |
| NTSDC2    | 4.66E-05 | 0.99995344  | -1.223070988 | 0.425208089 |
| NTSDC3    | 4.64E-05 | 0.999953599 | -2.571137409 | 0.155680264 |
| NTF4      | 4.64E-05 | 0.999953621 | 1.175024898  | 2.258035915 |
| NTMT1     | 4.60E-05 | 0.999954003 | 0.742748137  | 1.673589609 |
| NTN4      | 4.59E-05 | 0.999954099 | 1.590890714  | 3.062486661 |
| NTRK2     | 4.57E-05 | 0.999954256 | 0.811172234  | 1.757030734 |
| NTSR1     | 4.53E-05 | 0.999954666 | -1.728761227 | 0.297124974 |
| NUAK1     | 4.51E-05 | 0.99995487  | 1.402644126  | 2.655991497 |
| NUDC      | 4.50E-05 | 0.999954992 | -1.950332697 | 0.254061639 |
| NUDT15    | 4.50E-05 | 0.99995501  | -1.292035516 | 0.407483147 |
| NUDT16    | 4.48E-05 | 0.999955158 | -2.69072952  | 0.153853057 |
| NUDT16L1  | 4.42E-05 | 0.999955797 | -1.419693011 | 0.373673615 |
| NUDT19    | 4.41E-05 | 0.999955949 | -3.453687866 | 0.087145425 |
| NUDT5     | 4.40E-05 | 0.999956015 | 1.629655108  | 3.095413878 |
| NUDT8     | 4.38E-05 | 0.999956186 | 1.282354131  | 2.443371308 |
| NUF2      | 4.36E-05 | 0.9999564   | -0.82621131  | 0.562152026 |
| NUMB      | 4.32E-05 | 0.999956767 | -3.375121198 | 0.076741494 |
| NUP155    | 4.31E-05 | 0.999956891 | 0.623628228  | 1.540900278 |
| NUP188    | 4.31E-05 | 0.999956891 | 1.165631604  | 2.245686226 |
| NUP205    | 4.29E-05 | 0.99995714  | 1.069535004  | 2.099106187 |
| NUP210    | 4.26E-05 | 0.999957361 | 1.003252094  | 2.005167093 |
| NUP35     | 4.25E-05 | 0.999957514 | -0.78783468  | 0.578506047 |
| NUP85     | 4.16E-05 | 0.999958357 | -1.397615391 | 0.376886979 |
| NUP93     | 4.11E-05 | 0.999958939 | 1.054069949  | 2.07707026  |
| NUP98     | 4.07E-05 | 0.99995927  | 1.334261896  | 2.526586027 |
| NUSAP1    | 4.04E-05 | 0.999959606 | 2.041551981  | 4.254285503 |
| NUTF2     | 4.02E-05 | 0.999959831 | -2.150454784 | 0.213537015 |
| NUTM2G    | 4.00E-05 | 0.999960034 | 0.948441329  | 1.930611571 |
| NWD1      | 3.98E-05 | 0.999960163 | -1.471256769 | 0.359827467 |
| NXN       | 3.98E-05 | 0.999960166 | -0.868131371 | 0.547288664 |
| NXPE4     | 3.98E-05 | 0.999960233 | -3.447345886 | 0.084362678 |
| NXT1      | 3.97E-05 | 0.999960311 | 0.934431408  | 1.911816801 |
| OAF       | 3.95E-05 | 0.999960507 | 1.280909251  | 2.431407336 |
| OAS1      | 3.93E-05 | 0.99996072  | 0.667818425  | 1.58957509  |
| OAS2      | 3.88E-05 | 0.99996118  | -1.601394732 | 0.329298382 |
| ODC1      | 3.86E-05 | 0.999961384 | 0.793657067  | 1.733985788 |
| ODF2      | 3.78E-05 | 0.999962155 | 0.904214168  | 1.872420614 |
| OFD1P17   | 3.78E-05 | 0.999962201 | -2.051083587 | 0.236325169 |
| OGDHL     | 3.76E-05 | 0.999962353 | 1.297035385  | 2.459032676 |
| OGN       | 3.76E-05 | 0.999962377 | 0.657637009  | 1.579035524 |
| OLA1      | 3.76E-05 | 0.999962389 | 0.597693063  | 1.513802897 |
| OLFM4     | 3.75E-05 | 0.99996254  | 1.572639935  | 2.978397743 |
| OPA1      | 3.74E-05 | 0.999962618 | 0.684555652  | 1.60773573  |
| OPHN1     | 3.72E-05 | 0.99996281  | -2.572086236 | 0.160594729 |

|             |          |             |              |             |
|-------------|----------|-------------|--------------|-------------|
| OPTN        | 3.69E-05 | 0.999963097 | 1.26615925   | 2.406259751 |
| OR10AB1P    | 3.69E-05 | 0.999963141 | -0.681482805 | 0.623425882 |
| OR2A1-AS1   | 3.68E-05 | 0.999963248 | -2.208129988 | 0.209652814 |
| OR2A7       | 3.66E-05 | 0.999963412 | 0.742602639  | 1.673916486 |
| OR52B5P     | 3.65E-05 | 0.99996352  | -2.469540128 | 0.165082879 |
| OR52H2P     | 3.63E-05 | 0.999963734 | -3.440369583 | 0.087143809 |
| OR5BK1P     | 3.62E-05 | 0.999963772 | -1.510317088 | 0.345411672 |
| OR5BT1P     | 3.62E-05 | 0.999963793 | -1.226970648 | 0.425352485 |
| OR5E1P      | 3.62E-05 | 0.999963815 | 0.678119191  | 1.601056814 |
| OR5P1P      | 3.59E-05 | 0.999964053 | -1.366794019 | 0.384957007 |
| OR5P2       | 3.58E-05 | 0.999964198 | 0.651318758  | 1.570988486 |
| OR5P4P      | 3.53E-05 | 0.999964698 | -0.814924725 | 0.567025005 |
| ORC1        | 3.47E-05 | 0.999965273 | 2.418576658  | 5.556071754 |
| ORC5        | 3.44E-05 | 0.999965588 | -1.069168029 | 0.476267717 |
| ORC6        | 3.43E-05 | 0.999965724 | -0.865538099 | 0.548669301 |
| ORM1        | 3.42E-05 | 0.999965843 | 3.27783736   | 9.781311116 |
| OSBPL10     | 3.41E-05 | 0.999965856 | -2.009943304 | 0.247599286 |
| OSBPL10-AS1 | 3.39E-05 | 0.999966068 | 1.445798621  | 2.724702969 |
| OSMR-AS1    | 3.36E-05 | 0.999966379 | -1.493506942 | 0.3530124   |
| OTOP1       | 3.35E-05 | 0.999966507 | 0.924826243  | 1.899254185 |
| OTUD1       | 3.35E-05 | 0.999966542 | 1.960404594  | 3.913792904 |
| OVC1        | 3.33E-05 | 0.999966712 | 0.990585933  | 1.993626995 |
| OVC2        | 3.33E-05 | 0.999966747 | -2.543170226 | 0.163850551 |
| OVG1        | 3.31E-05 | 0.999966872 | 1.249681691  | 2.378031263 |
| OVOL2       | 3.28E-05 | 0.999967179 | -1.741442394 | 0.298795367 |
| OVOS2       | 3.28E-05 | 0.999967245 | 1.360314007  | 2.567875326 |
| OXA1L       | 3.27E-05 | 0.999967271 | 1.352756615  | 2.556262026 |
| OXL1D       | 3.26E-05 | 0.999967401 | -3.238692259 | 0.103299119 |
| OXNAD1      | 3.25E-05 | 0.999967539 | 0.934330028  | 1.911659516 |
| OXSM        | 3.24E-05 | 0.999967604 | 1.051098851  | 2.074008775 |
| OXR         | 3.24E-05 | 0.99996761  | -1.481583129 | 0.357520744 |
| P2RX5       | 3.24E-05 | 0.999967617 | 2.769636796  | 7.021460051 |
| P2RY11      | 3.22E-05 | 0.999967791 | -1.360439312 | 0.389283151 |
| P3H2        | 3.14E-05 | 0.999968569 | 1.357724298  | 2.565352333 |
| P4HA2       | 3.14E-05 | 0.999968616 | 1.054283321  | 2.077706007 |
| P4HB        | 3.12E-05 | 0.999968777 | -1.820204519 | 0.276312322 |
| PA2G4       | 3.04E-05 | 0.999969645 | -2.456838404 | 0.161916087 |
| PABPC1L     | 3.00E-05 | 0.999970043 | 0.836018461  | 1.788501247 |
| PABPC4      | 2.96E-05 | 0.99997036  | 1.624477203  | 3.170088394 |
| PAICS       | 2.96E-05 | 0.999970365 | -1.674744812 | 0.312764768 |
| PAK1P1      | 2.95E-05 | 0.999970533 | 0.703231605  | 1.628673206 |
| PAK3        | 2.94E-05 | 0.999970567 | -1.509838938 | 0.347344408 |
| PALB2       | 2.94E-05 | 0.999970622 | -1.096384078 | 0.467305052 |
| PALMD       | 2.92E-05 | 0.999970844 | 0.943941555  | 1.933608002 |
| PAPLN       | 2.91E-05 | 0.999970887 | -1.071179162 | 0.47522174  |
| PAPPA       | 2.90E-05 | 0.999970969 | -5.124572276 | 0.020736885 |
| PAPSS1      | 2.90E-05 | 0.999971008 | -1.609671871 | 0.327070147 |
| PAQR5       | 2.89E-05 | 0.999971053 | -1.494293415 | 0.35092306  |
| PAQR8       | 2.89E-05 | 0.999971101 | 0.554809956  | 1.469728776 |
| PARD3B      | 2.88E-05 | 0.999971182 | 1.371093844  | 2.621170074 |
| PARK2       | 2.88E-05 | 0.999971202 | -2.245441745 | 0.194554539 |
| PARK7       | 2.86E-05 | 0.999971362 | 1.191543812  | 2.291396379 |
| PARL        | 2.85E-05 | 0.999971461 | 0.98016984   | 1.972927631 |
| PARP1       | 2.84E-05 | 0.99997158  | 1.188753415  | 2.279668978 |
| PARP11      | 2.84E-05 | 0.999971602 | -2.702301905 | 0.153304929 |
| PARPBP      | 2.82E-05 | 0.999971793 | 1.56008498   | 2.949178087 |
| PARVA       | 2.81E-05 | 0.999971902 | 0.779370506  | 1.717206465 |
| PASK        | 2.80E-05 | 0.999971976 | -1.45722198  | 0.357280901 |
| PATL2       | 2.80E-05 | 0.999972011 | 1.473391061  | 2.809461572 |
| PATZ1       | 2.77E-05 | 0.999972261 | 1.490112941  | 2.816273535 |
| PAX8        | 2.74E-05 | 0.999972554 | -1.58180031  | 0.33324283  |
| PAX8-AS1    | 2.73E-05 | 0.999972682 | -1.602427961 | 0.32009111  |
| PAX9        | 2.73E-05 | 0.999972708 | 0.939046418  | 1.917599965 |
| PAXIP1      | 2.72E-05 | 0.999972818 | -1.115024792 | 0.459842356 |
| PAXIP1-AS1  | 2.70E-05 | 0.999973009 | -2.090029619 | 0.234312184 |
| PBDC1       | 2.70E-05 | 0.999973036 | -2.983050978 | 0.118095935 |
| PBK         | 2.69E-05 | 0.999973096 | 1.172462255  | 2.262339841 |
| PBX1        | 2.69E-05 | 0.999973126 | -2.080235695 | 0.220733921 |
| PBX4        | 2.68E-05 | 0.999973204 | 1.116793784  | 2.171133897 |
| PCAT1       | 2.66E-05 | 0.999973426 | 0.673005289  | 1.594844944 |
| PCAT2       | 2.66E-05 | 0.999973433 | -2.397531751 | 0.17863966  |
| PCBD1       | 2.65E-05 | 0.999973549 | -2.821897393 | 0.1369537   |
| PCBP1-AS1   | 2.64E-05 | 0.999973559 | -3.838217661 | 0.069762346 |
| PCCB        | 2.64E-05 | 0.999973568 | -1.815517604 | 0.27781735  |
| PCDH11X     | 2.62E-05 | 0.999973794 | -1.007113246 | 0.497342096 |
| PCDH12      | 2.62E-05 | 0.999973808 | -1.292924783 | 0.405980127 |
| PCDH19      | 2.62E-05 | 0.999973826 | 0.929447414  | 1.904954454 |
| PCDH7       | 2.61E-05 | 0.999973876 | -1.669534517 | 0.314301681 |
| PCDHA10     | 2.60E-05 | 0.999973962 | 1.179717935  | 2.26548011  |
| PCDHA11     | 2.60E-05 | 0.999974032 | 2.305785771  | 5.118467139 |
| PCDHA12     | 2.60E-05 | 0.999974033 | 0.525855309  | 1.440424411 |
| PCDHA2      | 2.60E-05 | 0.999974046 | 0.620257948  | 1.537397339 |
| PCDHA3      | 2.56E-05 | 0.999974368 | -1.943380351 | 0.258822299 |
| PCDHA4      | 2.56E-05 | 0.999974385 | -3.67689444  | 0.069393117 |
| PCDHA5      | 2.54E-05 | 0.999974596 | -1.445351068 | 0.360446185 |
| PCDHA6      | 2.54E-05 | 0.999974639 | 0.747272454  | 1.679150316 |
| PCDHA8      | 2.53E-05 | 0.999974664 | 0.934152167  | 1.911575973 |
| PCDHA9      | 2.53E-05 | 0.999974708 | -1.607118674 | 0.321614693 |
| PCDHAC1     | 2.53E-05 | 0.99997472  | -2.838785569 | 0.138260996 |
| PCDHAC2     | 2.52E-05 | 0.999974842 | -1.170960604 | 0.442657144 |
| PCDHB10     | 2.52E-05 | 0.999974844 | 1.12884884   | 2.186948537 |
| PCDHB11     | 2.51E-05 | 0.999974908 | -1.162904738 | 0.44107791  |
| PCDHB12     | 2.50E-05 | 0.999974995 | 1.838215259  | 3.603471713 |



|            |          |             |              |             |
|------------|----------|-------------|--------------|-------------|
| PCDH813    | 2.50E-05 | 0.999975008 | 0.958015895  | 1.948987614 |
| PCDH814    | 2.49E-05 | 0.999975123 | -1.577617516 | 0.332714029 |
| PCDH815    | 2.48E-05 | 0.999975221 | -3.526041739 | 0.059339943 |
| PCDH816    | 2.47E-05 | 0.999975337 | 0.819492737  | 1.764979535 |
| PCDH817P   | 2.46E-05 | 0.999975371 | -2.506888748 | 0.175865306 |
| PCDH818P   | 2.44E-05 | 0.999975628 | 1.133148532  | 2.201853749 |
| PCDH819P   | 2.43E-05 | 0.999975666 | -2.157058683 | 0.218794649 |
| PCDH82     | 2.42E-05 | 0.999975809 | -2.024065016 | 0.244630178 |
| PCDH83     | 2.42E-05 | 0.999975843 | 0.961174421  | 1.949766166 |
| PCDH84     | 2.41E-05 | 0.999975867 | -1.30687681  | 0.397514586 |
| PCDH85     | 2.39E-05 | 0.999976084 | -0.659575139 | 0.632848291 |
| PCDH86     | 2.39E-05 | 0.999976111 | 1.782275838  | 3.568506865 |
| PCDH87     | 2.39E-05 | 0.999976117 | -1.902600329 | 0.267233479 |
| PCDH88     | 2.38E-05 | 0.999976231 | -1.06102802  | 0.478935684 |
| PCDH89     | 2.37E-05 | 0.999976253 | -2.393495733 | 0.184937403 |
| PCDHGA1    | 2.37E-05 | 0.999976322 | -1.148325612 | 0.448700109 |
| PCDHGA10   | 2.37E-05 | 0.999976328 | 1.434403099  | 2.70285884  |
| PCDHGA11   | 2.35E-05 | 0.999976476 | 1.07644982   | 2.110727441 |
| PCDHGA12   | 2.34E-05 | 0.999976554 | -0.895876276 | 0.537388003 |
| PCDHGA2    | 2.31E-05 | 0.999976923 | -1.710262542 | 0.305339072 |
| PCDHGA3    | 2.31E-05 | 0.999976943 | -1.055231566 | 0.480773389 |
| PCDHGA4    | 2.27E-05 | 0.999977263 | -1.312786044 | 0.401620064 |
| PCDHGA5    | 2.25E-05 | 0.999977472 | -1.985398215 | 0.249029597 |
| PCDHGA6    | 2.25E-05 | 0.999977539 | 1.557198179  | 2.944023254 |
| PCDHGA7    | 2.24E-05 | 0.999977604 | -1.883570535 | 0.267675402 |
| PCDHGA8    | 2.24E-05 | 0.999977627 | 1.152501068  | 2.224128753 |
| PCDHGA9    | 2.23E-05 | 0.999977663 | -2.085282168 | 0.235396459 |
| PCDHGB1    | 2.23E-05 | 0.999977668 | 1.189091076  | 2.280477225 |
| PCDHGB2    | 2.22E-05 | 0.999977783 | -1.740436912 | 0.294478524 |
| PCDHGB3    | 2.17E-05 | 0.999978268 | -1.69501659  | 0.306059793 |
| PCDHGB4    | 2.15E-05 | 0.99997848  | -2.032851619 | 0.242161382 |
| PCDHGB5    | 2.15E-05 | 0.999978511 | -0.692344029 | 0.617316351 |
| PCDHGB6    | 2.14E-05 | 0.999978643 | -0.833498699 | 0.559647741 |
| PCDHGB7    | 2.11E-05 | 0.999978877 | -1.262575089 | 0.416567384 |
| PCDHGB8P   | 2.10E-05 | 0.999978975 | 1.115413037  | 2.168500959 |
| PCDHGB9P   | 2.09E-05 | 0.999979085 | 0.999042049  | 2.008573058 |
| PCDHGC4    | 2.06E-05 | 0.999979404 | -2.712431392 | 0.144809496 |
| PCED1B     | 2.05E-05 | 0.99997947  | -0.860331698 | 0.549962542 |
| PCED1B-AS1 | 2.05E-05 | 0.999979479 | -1.605729453 | 0.327956531 |
| PCGF1      | 2.03E-05 | 0.999979729 | -1.441562139 | 0.367569593 |
| PCGF6      | 2.02E-05 | 0.999979817 | -0.644227658 | 0.639626546 |
| PCID2      | 2.02E-05 | 0.999979837 | -2.588763206 | 0.152119052 |
| PCMTD1     | 2.01E-05 | 0.999979937 | 1.021723651  | 2.030542984 |
| PCNA       | 2.00E-05 | 0.999979981 | -0.876601696 | 0.544464943 |
| PCOLCE2    | 1.97E-05 | 0.999980297 | -0.808219348 | 0.570429727 |
| PCSK1      | 1.97E-05 | 0.999980317 | -0.971715251 | 0.509687987 |
| PCSK5      | 1.96E-05 | 0.999980383 | 2.344396538  | 5.135357082 |
| PCSK6      | 1.96E-05 | 0.999980405 | -0.882563876 | 0.540535329 |
| PCSK9      | 1.96E-05 | 0.999980423 | -1.67131062  | 0.305992302 |
| PDAP1      | 1.95E-05 | 0.999980475 | -1.470405074 | 0.358375597 |
| PDCD11     | 1.94E-05 | 0.999980606 | -2.447292262 | 0.182235546 |
| PDCD2      | 1.92E-05 | 0.999980825 | -0.885775205 | 0.540026493 |
| PDCD2L     | 1.91E-05 | 0.999980867 | -0.645954274 | 0.638714887 |
| PDCD5      | 1.90E-05 | 0.999981032 | -3.269328241 | 0.078477573 |
| PDCD6      | 1.88E-05 | 0.99998125  | -3.239876356 | 0.084030096 |
| PDCI3      | 1.87E-05 | 0.999981292 | -3.460082035 | 0.081426363 |
| PDE1B      | 1.86E-05 | 0.9999814   | -0.684129514 | 0.621901104 |
| PDE1C      | 1.86E-05 | 0.999981403 | 2.552848762  | 6.317623653 |
| PDE3B      | 1.86E-05 | 0.999981405 | 0.785456162  | 1.724692065 |
| PDE4B      | 1.85E-05 | 0.999981513 | 0.892227542  | 1.856369636 |
| PDE4DIP    | 1.84E-05 | 0.999981606 | 0.833492262  | 1.782657681 |
| PDE5A      | 1.84E-05 | 0.999981621 | 1.670455672  | 3.185999341 |
| PDE7A      | 1.83E-05 | 0.999981652 | 1.480684744  | 2.793757797 |
| PDE9A      | 1.82E-05 | 0.999981797 | -2.061856223 | 0.238149204 |
| PDGFA      | 1.82E-05 | 0.9999818   | -1.491473097 | 0.354485105 |
| PDGFB      | 1.81E-05 | 0.999981881 | 1.159258991  | 2.238880522 |
| PDGFRA     | 1.81E-05 | 0.999981885 | 1.312732238  | 2.485416791 |
| PDHA1      | 1.78E-05 | 0.999982197 | -0.635204691 | 0.643389152 |
| PDHB       | 1.77E-05 | 0.999982294 | 0.830561768  | 1.778748255 |
| PDI4A      | 1.77E-05 | 0.9999823   | 1.631403158  | 3.09925533  |
| PDI45      | 1.76E-05 | 0.999982385 | -2.244983523 | 0.193338326 |
| PDI46      | 1.75E-05 | 0.999982527 | -0.621187022 | 0.650079781 |
| PK1        | 1.73E-05 | 0.999982653 | -2.771001766 | 0.121254269 |
| PK3        | 1.73E-05 | 0.999982722 | -1.159878592 | 0.447437194 |
| PDLM3      | 1.73E-05 | 0.999982739 | 1.59630309   | 3.033530953 |
| PD2        | 1.72E-05 | 0.999982808 | -1.340038388 | 0.39047066  |
| PD2N       | 1.71E-05 | 0.999982883 | -2.159355597 | 0.223103041 |
| PD2G1      | 1.70E-05 | 0.999982953 | 0.730733004  | 1.659782882 |
| PD2S1      | 1.70E-05 | 0.999983015 | -0.548131111 | 0.683767569 |
| PD2D2      | 1.70E-05 | 0.999983036 | 1.186368077  | 2.278315501 |
| PD2D7      | 1.68E-05 | 0.999983175 | 1.52749215   | 2.924342898 |
| PD2K1      | 1.68E-05 | 0.999983192 | -2.096533527 | 0.233432566 |
| PD2K1IP1   | 1.68E-05 | 0.999983211 | 0.560927065  | 1.475693332 |
| PD2RN3     | 1.68E-05 | 0.999983249 | 1.138422745  | 2.201739859 |
| PEAK1      | 1.67E-05 | 0.999983259 | -1.828769123 | 0.268164948 |
| PEBP1      | 1.66E-05 | 0.999983356 | -2.28151718  | 0.205560879 |
| PEF1       | 1.66E-05 | 0.99998338  | 0.846721531  | 1.799111529 |
| PEL12      | 1.63E-05 | 0.999983706 | -1.029909367 | 0.489663486 |
| PEL1P      | 1.62E-05 | 0.999983811 | -1.223079955 | 0.428233304 |
| PER3       | 1.62E-05 | 0.999983832 | -4.670093092 | 0.034665944 |
| PES1       | 1.60E-05 | 0.999983968 | -2.726118785 | 0.141983908 |
| PET117     | 1.60E-05 | 0.999983973 | 1.025398477  | 2.035606871 |
| PEX10      | 1.59E-05 | 0.999984105 | -0.95477454  | 0.515404786 |

|           |          |             |              |             |
|-----------|----------|-------------|--------------|-------------|
| PEX11A    | 1.56E-05 | 0.999984352 | 1.844152455  | 3.617186289 |
| PEX5      | 1.55E-05 | 0.999984454 | 1.762596991  | 3.426963985 |
| PFAS      | 1.55E-05 | 0.999984449 | 2.807323214  | 8.201802575 |
| PFDN2     | 1.55E-05 | 0.999984509 | 1.155781731  | 2.228514757 |
| PFDN4     | 1.55E-05 | 0.99998453  | -1.776760172 | 0.289871796 |
| PFDN5     | 1.54E-05 | 0.999984567 | -0.855031801 | 0.552619437 |
| PFDN6     | 1.53E-05 | 0.999984745 | -4.64873862  | 0.022518593 |
| PFKFB3    | 1.52E-05 | 0.999984758 | -3.886049279 | 0.056548065 |
| PFKFB4    | 1.52E-05 | 0.999984763 | -0.814859612 | 0.56813495  |
| PFKM      | 1.51E-05 | 0.999984869 | -1.9550636   | 0.254286463 |
| PFKP      | 1.51E-05 | 0.999984949 | -2.560859671 | 0.147734263 |
| PFN1      | 1.50E-05 | 0.999984964 | 1.050525278  | 2.07188226  |
| PGAM1     | 1.50E-05 | 0.999984971 | -0.80084224  | 0.573949351 |
| PGAM1P5   | 1.50E-05 | 0.999984976 | -1.607117185 | 0.318861823 |
| PGAM5     | 1.47E-05 | 0.999985252 | 1.548899577  | 2.927198926 |
| PGBD1     | 1.47E-05 | 0.999985273 | -1.797383238 | 0.286055742 |
| PGBD5     | 1.47E-05 | 0.999985328 | 0.857004539  | 1.811370404 |
| PGD       | 1.46E-05 | 0.999985378 | -1.041687672 | 0.484472555 |
| PGF       | 1.45E-05 | 0.999985457 | -3.55212088  | 0.073041156 |
| PGK1      | 1.45E-05 | 0.999985484 | 0.647344014  | 1.566358177 |
| PGLYRP3   | 1.45E-05 | 0.999985492 | 1.894732798  | 3.810543112 |
| PGLYRP4   | 1.44E-05 | 0.999985585 | -1.150413249 | 0.450460329 |
| PGM2      | 1.42E-05 | 0.999985756 | -1.920086529 | 0.258956325 |
| PGP       | 1.42E-05 | 0.999985808 | -0.538853926 | 0.688032695 |
| PHB       | 1.42E-05 | 0.999985847 | 1.315934248  | 2.492696964 |
| PHB2      | 1.41E-05 | 0.999985927 | 1.7981728    | 3.519556966 |
| PHC1      | 1.40E-05 | 0.999985959 | -3.77157925  | 0.065949382 |
| PHF1      | 1.39E-05 | 0.99998607  | -4.687720173 | 0.02190738  |
| PHF14     | 1.39E-05 | 0.999986098 | -2.528976671 | 0.165330256 |
| PHF21A    | 1.39E-05 | 0.99998613  | 1.467584819  | 2.788658619 |
| PHF23     | 1.38E-05 | 0.999986211 | -1.682271741 | 0.311535949 |
| PHF5A     | 1.37E-05 | 0.999986271 | -2.305175878 | 0.201824502 |
| PHGDH     | 1.37E-05 | 0.999986349 | 1.036560594  | 2.06398195  |
| PHKA1     | 1.36E-05 | 0.999986351 | -1.518749673 | 0.34887684  |
| PHLPP2    | 1.36E-05 | 0.999986382 | 1.553402845  | 2.942763578 |
| PI3       | 1.36E-05 | 0.9999864   | 0.689535219  | 1.613635717 |
| PID1      | 1.36E-05 | 0.999986402 | 1.178402563  | 2.279467554 |
| PIF1      | 1.36E-05 | 0.999986407 | -3.24503542  | 0.092352177 |
| PIFO      | 1.35E-05 | 0.999986476 | -0.973915827 | 0.508868488 |
| PIH1D1    | 1.34E-05 | 0.999986592 | 3.100934592  | 9.14956137  |
| PIK3AP1   | 1.33E-05 | 0.999986689 | 3.500003252  | 12.58109541 |
| PIM2      | 1.32E-05 | 0.99998677  | 1.512916761  | 2.916227895 |
| PINX1     | 1.31E-05 | 0.999986894 | 0.53955707   | 1.453993529 |
| PIPSK1B   | 1.30E-05 | 0.999986999 | 0.806580119  | 1.749628395 |
| PIR       | 1.30E-05 | 0.999987003 | 0.878525158  | 1.843911981 |
| PITHD1    | 1.29E-05 | 0.99998705  | -1.467884497 | 0.361141203 |
| PITRM1    | 1.29E-05 | 0.999987055 | -0.932840548 | 0.523520949 |
| PIWIL4    | 1.29E-05 | 0.999987132 | -3.188774653 | 0.087932082 |
| PKD2      | 1.28E-05 | 0.99998719  | 1.27400061   | 2.432109175 |
| PKHD1     | 1.28E-05 | 0.999987199 | 1.02429897   | 2.035354216 |
| PKM       | 1.28E-05 | 0.99998724  | -2.012883768 | 0.243276774 |
| PKNOX2    | 1.28E-05 | 0.999987248 | -1.23151895  | 0.424584119 |
| PKP1      | 1.27E-05 | 0.999987334 | 1.116841307  | 2.170025467 |
| PLA2G16   | 1.26E-05 | 0.999987415 | -1.225414018 | 0.423164635 |
| PLA2G4F   | 1.25E-05 | 0.999987481 | 2.172639804  | 4.5958891   |
| PLA2R1    | 1.25E-05 | 0.999987515 | -1.197874213 | 0.435045163 |
| PLAUR     | 1.25E-05 | 0.999987533 | 1.667048381  | 3.211877022 |
| PLCB1     | 1.24E-05 | 0.999987551 | 1.18030802   | 2.266273445 |
| PLCB1-IT1 | 1.24E-05 | 0.999987614 | 2.615291066  | 6.144014063 |
| PLCB2     | 1.23E-05 | 0.999987676 | -1.812393709 | 0.275840761 |
| PLCL2     | 1.23E-05 | 0.999987687 | -6.124294722 | 0.013822911 |
| PLD1      | 1.23E-05 | 0.999987727 | -1.853172    | 0.276197882 |
| PLD5      | 1.22E-05 | 0.999987755 | 0.74893338   | 1.680786586 |
| PLD6      | 1.21E-05 | 0.999987916 | -1.917935641 | 0.2572466   |
| PLEKHA4   | 1.20E-05 | 0.999987997 | 1.272570069  | 2.4412098   |
| PLEKHA5   | 1.19E-05 | 0.999988147 | -1.178939355 | 0.441172468 |
| PLEKHB1   | 1.18E-05 | 0.999988176 | 2.112388115  | 4.339427568 |
| PLEKHD1   | 1.18E-05 | 0.999988188 | 1.169254607  | 2.250906257 |
| PLEKHF1   | 1.17E-05 | 0.999988258 | 2.015824786  | 4.056845627 |
| PLEKHG1   | 1.17E-05 | 0.999988276 | -2.477978524 | 0.176822396 |
| PLEKHH2   | 1.17E-05 | 0.999988302 | -0.998768556 | 0.4981881   |
| PLEKHJ1   | 1.17E-05 | 0.999988318 | 1.136938365  | 2.202085162 |
| PLEKHM3   | 1.16E-05 | 0.999988356 | 1.462069906  | 2.779603388 |
| PLEKHS1   | 1.15E-05 | 0.999988466 | -2.97849886  | 0.115644557 |
| PLGLB2    | 1.15E-05 | 0.999988489 | 0.756053546  | 1.690629434 |
| PLIN1     | 1.15E-05 | 0.999988511 | 1.211339251  | 2.315965655 |
| PLIN5     | 1.15E-05 | 0.999988553 | -1.724943962 | 0.301048608 |
| PLK1      | 1.13E-05 | 0.999988726 | 1.11021581   | 2.159861627 |
| PLK3      | 1.12E-05 | 0.999988765 | -2.581647824 | 0.160306119 |
| PLPP3     | 1.12E-05 | 0.999988789 | -2.252668132 | 0.202185493 |
| PLPP4     | 1.12E-05 | 0.999988798 | -3.449488268 | 0.070059246 |
| PLPPR4    | 1.12E-05 | 0.999988835 | 1.283630807  | 2.441837386 |
| PLS3-AS1  | 1.10E-05 | 0.999989015 | -1.304692456 | 0.402384933 |
| PLXDC1    | 1.09E-05 | 0.999989064 | 1.078026583  | 2.112392321 |
| PLXDC2    | 1.09E-05 | 0.99998908  | 0.648701847  | 1.569230092 |
| PM20D1    | 1.08E-05 | 0.999989232 | 0.57608345   | 1.491160746 |
| PMPEA1    | 1.08E-05 | 0.999989248 | -2.234084662 | 0.21179236  |
| PMM2      | 1.06E-05 | 0.999989395 | 2.023094778  | 4.135487655 |
| PMP22     | 1.06E-05 | 0.999989395 | -1.353885604 | 0.391113895 |
| PMPCA     | 1.06E-05 | 0.999989404 | 0.844494471  | 1.796753711 |
| PNLUPRP3  | 1.06E-05 | 0.99998944  | -0.756637753 | 0.591271173 |
| PNMA1     | 1.06E-05 | 0.999989445 | -1.155387206 | 0.447023353 |
| PNMA2     | 1.05E-05 | 0.999989498 | 0.555971974  | 1.471166031 |

|          |          |             |              |             |
|----------|----------|-------------|--------------|-------------|
| PNMAL1   | 1.05E-05 | 0.999989499 | 1.39566841   | 2.638035248 |
| PNN      | 1.04E-05 | 0.99998962  | -3.055080363 | 0.098279263 |
| PNO1     | 1.00E-05 | 0.999989967 | -2.518907266 | 0.16589522  |
| PNP      | 9.96E-06 | 0.999990038 | 1.976505111  | 4.008143385 |
| PNPT1    | 9.95E-06 | 0.999990048 | 1.361021222  | 2.573760725 |
| PNPT1P1  | 9.92E-06 | 0.999990008 | -3.104665053 | 0.106833571 |
| POCIA    | 9.92E-06 | 0.999990081 | -1.515403505 | 0.344096248 |
| PODNL1   | 9.89E-06 | 0.999990108 | 1.204398267  | 2.315137542 |
| PODXL    | 9.86E-06 | 0.999990138 | -3.967291142 | 0.039296004 |
| PODXL2   | 9.78E-06 | 0.999990223 | 1.79419158   | 3.475637817 |
| POF1B    | 9.78E-06 | 0.999990224 | -1.897271534 | 0.25775252  |
| POLA2    | 9.64E-06 | 0.999990357 | 0.649140961  | 1.570136646 |
| POLD1    | 9.60E-06 | 0.999990405 | 1.197293562  | 2.300203337 |
| POLD2    | 9.59E-06 | 0.999990411 | 2.466280566  | 5.585849334 |
| POLD4    | 9.55E-06 | 0.999990448 | -0.590847181 | 0.663555508 |
| POLDIP2  | 9.53E-06 | 0.999990465 | -1.304964835 | 0.404459045 |
| POLE     | 9.37E-06 | 0.999990626 | 0.875472607  | 1.837024405 |
| POLE3    | 9.35E-06 | 0.999990652 | -0.792076826 | 0.576850871 |
| POLG2    | 9.30E-06 | 0.999990703 | 0.772873603  | 1.709384996 |
| POLR1A   | 9.30E-06 | 0.999990704 | 1.509512911  | 2.861709626 |
| POLR1B   | 9.28E-06 | 0.999990723 | -1.851493914 | 0.277077321 |
| POLR1C   | 9.27E-06 | 0.999990727 | 1.215510816  | 2.323276081 |
| POLR1D   | 9.27E-06 | 0.999990733 | -1.91472999  | 0.264763472 |
| POLR1E   | 9.26E-06 | 0.999990736 | -1.015032178 | 0.494674054 |
| POLR2B   | 9.26E-06 | 0.999990741 | 1.007127722  | 2.010761248 |
| POLR2C   | 9.24E-06 | 0.999990763 | 1.413937732  | 2.665393045 |
| POLR2G   | 9.22E-06 | 0.999990782 | 0.77447763   | 1.710870741 |
| POLR2H   | 9.13E-06 | 0.999990866 | -2.668858469 | 0.154536547 |
| POLR3A   | 9.12E-06 | 0.999990881 | -1.290755897 | 0.404304032 |
| POLR3B   | 9.10E-06 | 0.999990898 | -1.624889894 | 0.317810814 |
| POLR3D   | 9.10E-06 | 0.999990904 | 1.244784773  | 2.374777816 |
| POLR3E   | 9.03E-06 | 0.999990968 | -2.509420685 | 0.165559995 |
| POLR3G   | 8.94E-06 | 0.999991057 | -1.55162733  | 0.338980845 |
| POLR3H   | 8.93E-06 | 0.999991068 | 2.089130711  | 4.510597251 |
| POLR3K   | 8.93E-06 | 0.999991074 | 1.713750734  | 3.283153549 |
| POP1     | 8.78E-06 | 0.999991216 | 0.655938405  | 1.575642565 |
| POP4     | 8.74E-06 | 0.999991264 | -1.806159568 | 0.275159597 |
| POP7     | 8.70E-06 | 0.999991295 | 0.562117255  | 1.476982842 |
| POT1-AS1 | 8.68E-06 | 0.999991317 | -1.749761762 | 0.292195954 |
| POTEF    | 8.67E-06 | 0.99999133  | -1.077433505 | 0.473354333 |
| POU2F3   | 8.66E-06 | 0.999991343 | -0.842864383 | 0.557391978 |
| POU5F1B  | 8.54E-06 | 0.999991462 | -1.243669445 | 0.421641361 |
| POU5F2   | 8.53E-06 | 0.999991467 | 1.129787531  | 2.189246568 |
| POU6F1   | 8.52E-06 | 0.999991481 | -1.704892961 | 0.306332071 |
| PPA1     | 8.47E-06 | 0.999991534 | 1.741336894  | 3.360427133 |
| PPAN     | 8.37E-06 | 0.999991625 | 0.958509095  | 1.944874668 |
| PPARA    | 8.34E-06 | 0.999991657 | -0.876566472 | 0.543545224 |
| PPARG    | 8.33E-06 | 0.999991666 | 0.957157896  | 1.94302987  |
| PPARGC1A | 8.21E-06 | 0.999991791 | 0.835576857  | 1.785193459 |
| PPARGC1B | 8.20E-06 | 0.999991796 | -3.642314511 | 0.048397917 |
| PPAT     | 8.13E-06 | 0.999991874 | 0.654474058  | 1.575912368 |
| PPFIA2   | 8.07E-06 | 0.999991927 | -5.638238489 | 0.020004448 |
| PPIA     | 8.07E-06 | 0.999991928 | 0.761751665  | 1.696091631 |
| PPIAP22  | 8.05E-06 | 0.999991946 | -0.702716888 | 0.613831376 |
| PPIB     | 8.00E-06 | 0.999992002 | 1.01972447   | 2.038034769 |
| PPIF     | 7.77E-06 | 0.999992233 | -1.849665811 | 0.276471545 |
| PPIH     | 7.76E-06 | 0.999992236 | -2.680874973 | 0.154324029 |
| PPIL1    | 7.76E-06 | 0.99999224  | 1.209260913  | 2.322575676 |
| PPM1F    | 7.73E-06 | 0.99999227  | -1.414138751 | 0.375007441 |
| PPM1G    | 7.68E-06 | 0.999992323 | -1.154606239 | 0.448291015 |
| PPM1L    | 7.65E-06 | 0.999992346 | -2.066069046 | 0.23851089  |
| PPM1M    | 7.56E-06 | 0.999992443 | 1.57357231   | 2.976710136 |
| PPP1R12B | 7.47E-06 | 0.999992533 | -2.251474915 | 0.20972814  |
| PPP1R13L | 7.44E-06 | 0.999992561 | -3.428210228 | 0.092713227 |
| PPP1R14B | 7.29E-06 | 0.999992707 | -1.158409243 | 0.44770474  |
| PPP1R16A | 7.16E-06 | 0.999992845 | -1.625567979 | 0.320741094 |
| PPP1R1B  | 7.15E-06 | 0.999992851 | -1.030500246 | 0.486467277 |
| PPP1R3C  | 7.01E-06 | 0.999992994 | 1.204518522  | 2.30894988  |
| PPP1R3F  | 6.95E-06 | 0.999993052 | 0.987460794  | 1.983676782 |
| PPP1R7   | 6.90E-06 | 0.999993103 | 0.800512736  | 1.742492556 |
| PPP1R8   | 6.79E-06 | 0.999993213 | -1.584680954 | 0.333343701 |
| PPP1R8P1 | 6.74E-06 | 0.999993265 | -2.5939089   | 0.1557374   |
| PPP2R2B  | 6.73E-06 | 0.999993265 | -1.645466327 | 0.316916644 |
| PPP3CC   | 6.67E-06 | 0.99999333  | 1.321973234  | 2.505240859 |
| PPP4R1L  | 6.65E-06 | 0.999993353 | 1.684024042  | 3.241727527 |
| PPP4R4   | 6.64E-06 | 0.99999336  | -3.664871211 | 0.066732797 |
| PPRC1    | 6.59E-06 | 0.999993405 | -0.846709874 | 0.555560606 |
| PPTC7    | 6.54E-06 | 0.999993458 | 0.591308105  | 1.507464302 |
| PRADC1   | 6.52E-06 | 0.999993483 | -0.755169261 | 0.592206998 |
| PRC1     | 6.51E-06 | 0.999993486 | -2.643725705 | 0.154791155 |
| PRDM15   | 6.49E-06 | 0.999993507 | -1.049748898 | 0.48076722  |
| PRDM2    | 6.49E-06 | 0.99999351  | -2.096427709 | 0.217597426 |
| PRDM8    | 6.49E-06 | 0.999993511 | 0.769017621  | 1.704642652 |
| PRDX1    | 6.27E-06 | 0.999993726 | -2.163593962 | 0.220012669 |
| PRDX1P1  | 6.24E-06 | 0.99999376  | 1.921723653  | 3.789194663 |
| PRDX3    | 6.14E-06 | 0.999993863 | 0.771512888  | 1.707735177 |
| PRDX3P2  | 6.08E-06 | 0.999993923 | 1.445657932  | 2.724736825 |
| PRDX3P4  | 6.07E-06 | 0.999993927 | -2.164036335 | 0.21659474  |
| PRDX4    | 6.03E-06 | 0.999993973 | -0.891727364 | 0.537549908 |
| PRDX6    | 5.93E-06 | 0.999994066 | 0.913729308  | 1.884076465 |
| PREB     | 5.92E-06 | 0.99999408  | -1.819648459 | 0.281127101 |
| PRELID1  | 5.89E-06 | 0.999994115 | -1.519787615 | 0.348634435 |
| PRELID3A | 5.89E-06 | 0.999994115 | -1.946473099 | 0.253974686 |

|              |          |             |              |             |
|--------------|----------|-------------|--------------|-------------|
| PRELID3B     | 5.87E-06 | 0.999994133 | 1.296068029  | 2.456087351 |
| PRELP        | 5.86E-06 | 0.999994139 | 1.135731996  | 2.205442334 |
| PRG4         | 5.84E-06 | 0.999994161 | 1.00394209   | 2.010907367 |
| PRICKLE1     | 5.79E-06 | 0.999994207 | -0.798963654 | 0.574226563 |
| PRICKLE2     | 5.72E-06 | 0.999994279 | -1.311148288 | 0.402652751 |
| PRICKLE2-AS1 | 5.60E-06 | 0.999994403 | 1.165174484  | 2.243828977 |
| PRICKLE2-AS3 | 5.58E-06 | 0.999994418 | -2.102756088 | 0.217027451 |
| PRKAA2       | 5.49E-06 | 0.999994506 | -2.568855585 | 0.167846232 |
| PRKACA       | 5.40E-06 | 0.999994595 | 0.835823225  | 1.785181024 |
| PRKAG1       | 5.35E-06 | 0.99999465  | -1.207402074 | 0.429804161 |
| PRKAG2-AS1   | 5.33E-06 | 0.999994667 | -1.170058741 | 0.441800244 |
| PRKAR1B      | 5.26E-06 | 0.999994742 | -1.273317942 | 0.412060659 |
| PRKAR2B      | 5.25E-06 | 0.99999475  | 0.546874364  | 1.461200846 |
| PRKCA        | 5.24E-06 | 0.999994762 | -1.764013063 | 0.29313368  |
| PRKCD        | 5.16E-06 | 0.999994842 | -0.951421358 | 0.516807855 |
| PRKCDPB      | 5.14E-06 | 0.999994864 | -1.051911572 | 0.479552254 |
| PRKD1        | 5.13E-06 | 0.999994867 | 1.496029507  | 2.835228007 |
| PRKDC        | 5.11E-06 | 0.999994889 | -2.010785837 | 0.242118416 |
| PRMT1        | 5.11E-06 | 0.999994895 | -0.832791886 | 0.56064685  |
| PRMT2        | 5.06E-06 | 0.999994939 | 1.562467237  | 2.95716882  |
| PRMT3        | 5.04E-06 | 0.999994955 | 3.253323734  | 10.56169728 |
| PRMT5        | 4.97E-06 | 0.999995032 | -2.086675533 | 0.224686931 |
| PRMT6        | 4.94E-06 | 0.999995063 | 1.396243127  | 2.635513206 |
| PRMT7        | 4.93E-06 | 0.999995075 | 1.062018944  | 2.09293476  |
| PRNCR1       | 4.88E-06 | 0.999995124 | -0.633019748 | 0.643799469 |
| PRORSD1P     | 4.85E-06 | 0.999995149 | -2.132344695 | 0.21976704  |
| PROX1        | 4.83E-06 | 0.999995167 | 0.946240331  | 1.927664997 |
| PROX2        | 4.82E-06 | 0.999995182 | -3.733772329 | 0.07492908  |
| PRPF19       | 4.81E-06 | 0.99999519  | -2.509810416 | 0.175496026 |
| PRPF31       | 4.80E-06 | 0.999995197 | 1.483561259  | 2.809046338 |
| PRPF4        | 4.78E-06 | 0.999995217 | 1.012724962  | 2.018169703 |
| PRPF8        | 4.67E-06 | 0.999995329 | -1.207343729 | 0.429090239 |
| PRPS1        | 4.67E-06 | 0.999995334 | 0.689542041  | 1.613324862 |
| PRPS2        | 4.63E-06 | 0.999995369 | -2.952662265 | 0.104992404 |
| PRPSAP1      | 4.59E-06 | 0.999995409 | 1.200721833  | 2.301321649 |
| PRR11        | 4.59E-06 | 0.999995413 | 0.862998717  | 1.819481179 |
| PRR13        | 4.54E-06 | 0.999995464 | 1.072490469  | 2.105627718 |
| PRR16        | 4.53E-06 | 0.999995469 | -0.826906038 | 0.562945167 |
| PRR5         | 4.50E-06 | 0.999995496 | 0.914248561  | 1.886604996 |
| PRR5-ARHGAP8 | 4.49E-06 | 0.999995509 | 1.420568353  | 2.677496435 |
| PRR7         | 4.49E-06 | 0.999995512 | 1.534875969  | 2.899886346 |
| PRR7-AS1     | 4.47E-06 | 0.999995531 | -1.941251954 | 0.245914332 |
| PRSS1        | 4.42E-06 | 0.999995585 | 1.271949392  | 2.417678004 |
| PRSS21       | 4.40E-06 | 0.999995596 | 1.269364477  | 2.414358682 |
| PRSS37       | 4.37E-06 | 0.999995633 | 0.542433714  | 1.457062835 |
| PRSS45       | 4.32E-06 | 0.999995679 | -2.133436891 | 0.22299088  |
| PRSS50       | 4.32E-06 | 0.999995682 | 1.293229302  | 2.452282686 |
| PRSS51       | 4.30E-06 | 0.999995703 | -2.009241002 | 0.248351866 |
| PRSS55       | 4.24E-06 | 0.999995759 | -1.254049947 | 0.414719601 |
| PRTG         | 4.24E-06 | 0.999995765 | 0.51504164   | 1.429181379 |
| PRX          | 4.23E-06 | 0.999995768 | -5.634678816 | 0.020088746 |
| PSAP         | 4.21E-06 | 0.999995785 | 0.938166038  | 1.917547577 |
| PSAT1        | 4.21E-06 | 0.999995789 | 1.300685807  | 2.464743288 |
| PSEN1        | 4.13E-06 | 0.999995871 | 0.765699193  | 1.701809394 |
| PSMA5        | 4.11E-06 | 0.999995888 | 1.585402732  | 3.001363484 |
| PSMA7        | 4.10E-06 | 0.999995897 | -2.564409494 | 0.145625123 |
| PSMB1        | 4.07E-06 | 0.999995929 | 1.192941012  | 2.286779119 |
| PSMB2        | 4.07E-06 | 0.99999593  | -0.624709987 | 0.648390529 |
| PSMB3        | 4.06E-06 | 0.999995942 | -1.813637402 | 0.284315853 |
| PSMB4        | 3.96E-06 | 0.999996044 | 0.659543622  | 1.579876    |
| PSMB5        | 3.95E-06 | 0.999996051 | -1.528736557 | 0.343037463 |
| PSMB6        | 3.94E-06 | 0.999996061 | 1.463164151  | 2.769977891 |
| PSMB7        | 3.94E-06 | 0.999996063 | -1.339134343 | 0.395025785 |
| PSMB8        | 3.93E-06 | 0.999996073 | 1.163847949  | 2.242429651 |
| PSMC1        | 3.89E-06 | 0.999996106 | -0.797999333 | 0.574260231 |
| PSMC1P5      | 3.88E-06 | 0.999996124 | -0.67278782  | 0.626964053 |
| PSMC1P7      | 3.87E-06 | 0.999996132 | 0.946357487  | 1.927122927 |
| PSMC3        | 3.78E-06 | 0.999996216 | 0.546152586  | 1.460445243 |
| PSMC3IP      | 3.75E-06 | 0.999996249 | 1.738025649  | 3.384772059 |
| PSMC4        | 3.75E-06 | 0.999996254 | -1.080216057 | 0.47213442  |
| PSMD13       | 3.74E-06 | 0.999996263 | -3.007612396 | 0.101651844 |
| PSMD14       | 3.73E-06 | 0.99999627  | -3.847982656 | 0.045901603 |
| PSMD2        | 3.71E-06 | 0.999996293 | -3.25300492  | 0.073130016 |
| PSMD3        | 3.69E-06 | 0.999996307 | -2.210616042 | 0.215463929 |
| PSMD4        | 3.60E-06 | 0.999996397 | -1.761918116 | 0.291169287 |
| PSMD5-AS1    | 3.58E-06 | 0.999996416 | 0.884337743  | 1.846095513 |
| PSMD7        | 3.57E-06 | 0.999996426 | 1.877490567  | 3.767328508 |
| PSMD8        | 3.56E-06 | 0.999996435 | -3.98629465  | 0.055178298 |
| PSME1        | 3.54E-06 | 0.999996459 | 1.175294682  | 2.25854366  |
| PSME2        | 3.47E-06 | 0.999996525 | 1.384852641  | 2.639609001 |
| PSME3        | 3.44E-06 | 0.999996559 | -3.350728036 | 0.09542514  |
| PSMG1        | 3.43E-06 | 0.999996569 | 1.071537755  | 2.102380629 |
| PSMG3        | 3.39E-06 | 0.999996613 | 0.94383429   | 1.926379687 |
| PSMG4        | 3.39E-06 | 0.999996614 | 0.883305449  | 1.8477931   |
| PSORS1C1     | 3.37E-06 | 0.999996625 | 0.686916836  | 1.610364059 |
| PSPH         | 3.36E-06 | 0.999996644 | -5.78545383  | 0.012279798 |
| PTBP1        | 3.35E-06 | 0.999996651 | 0.761049041  | 1.695041497 |
| PTCD3        | 3.33E-06 | 0.999996674 | -0.703885406 | 0.612557353 |
| PTCHD1       | 3.30E-06 | 0.999996696 | -1.25378225  | 0.419184805 |
| PTDSS1       | 3.28E-06 | 0.999996716 | 0.744146204  | 1.675447877 |
| PTDSS2       | 3.27E-06 | 0.999996727 | 2.300475409  | 5.064097581 |
| PTGER4       | 3.25E-06 | 0.999996749 | -1.492675913 | 0.352870436 |
| PTGES2       | 3.23E-06 | 0.999996774 | -1.361193941 | 0.382548388 |

|              |          |             |              |             |
|--------------|----------|-------------|--------------|-------------|
| PTGIS        | 3.20E-06 | 0.999996799 | -0.892888259 | 0.537764201 |
| PTMA         | 3.19E-06 | 0.999996808 | 1.033127916  | 2.04692648  |
| PTMAP3       | 3.09E-06 | 0.99999691  | 0.989556215  | 1.986406753 |
| PTP4A1       | 3.09E-06 | 0.999996912 | 1.564115168  | 2.987660558 |
| PTPN14       | 3.09E-06 | 0.999996914 | -2.931636957 | 0.130246894 |
| PTPN21       | 3.08E-06 | 0.999996917 | 1.400054155  | 2.66779782  |
| PTPRC        | 3.04E-06 | 0.999996963 | 1.706974591  | 3.346122363 |
| PTPRE        | 3.03E-06 | 0.999996966 | -1.199335261 | 0.434209066 |
| PTPRG-AS1    | 3.03E-06 | 0.999996968 | -1.369919962 | 0.38565201  |
| PTPRM        | 3.01E-06 | 0.999996989 | 1.789099999  | 3.476764451 |
| PTPRZ1       | 3.01E-06 | 0.999996992 | 1.39317661   | 2.631554193 |
| PTRF         | 3.01E-06 | 0.999996994 | 1.488393174  | 2.806990807 |
| PTRH2        | 2.99E-06 | 0.999997005 | -1.840674924 | 0.275405888 |
| PTRHD1       | 2.99E-06 | 0.999997006 | 0.622821434  | 1.540118006 |
| PTTG1        | 2.96E-06 | 0.999997036 | -1.275696653 | 0.412806618 |
| PTX3         | 2.95E-06 | 0.999997046 | -1.689836641 | 0.309674522 |
| PUDP         | 2.95E-06 | 0.999997048 | 1.41298948   | 2.681414842 |
| PUM3         | 2.95E-06 | 0.999997049 | -3.211562036 | 0.085276839 |
| PUS1         | 2.93E-06 | 0.999997073 | -0.878150551 | 0.543825172 |
| PUS3         | 2.90E-06 | 0.999997095 | 0.855428427  | 1.812124751 |
| PUS7         | 2.88E-06 | 0.999997116 | -0.978004075 | 0.506439502 |
| PVR          | 2.88E-06 | 0.999997118 | -1.742571139 | 0.289748025 |
| PVT1         | 2.88E-06 | 0.999997119 | -1.092754826 | 0.467230163 |
| PWP1         | 2.87E-06 | 0.999997128 | -0.80372892  | 0.572389992 |
| PXDN         | 2.86E-06 | 0.999997141 | 1.374906986  | 2.595419427 |
| PXN-AS1      | 2.86E-06 | 0.999997142 | -1.431816308 | 0.369170268 |
| PYCR1        | 2.83E-06 | 0.999997168 | -3.208948353 | 0.104213401 |
| PYCRL        | 2.78E-06 | 0.999997218 | -2.403364005 | 0.171691727 |
| PYGL         | 2.74E-06 | 0.999997258 | 0.954570091  | 1.938712515 |
| PYM1         | 2.74E-06 | 0.99999726  | -2.740886199 | 0.147251531 |
| PYROXD2      | 2.73E-06 | 0.999997268 | 0.972661121  | 1.962571661 |
| QARS         | 2.73E-06 | 0.999997271 | 2.14442309   | 4.476699869 |
| QDPR         | 2.71E-06 | 0.999997287 | -1.597942138 | 0.324926759 |
| QPCTL        | 2.70E-06 | 0.999997302 | -5.491473228 | 0.017661601 |
| QRICH2       | 2.69E-06 | 0.999997313 | 1.284221518  | 2.438724627 |
| QSOX2        | 2.63E-06 | 0.999997374 | 0.941336551  | 1.921071517 |
| QTRTD1       | 2.60E-06 | 0.999997402 | -1.681472078 | 0.311310987 |
| RAB11FIP1P1  | 2.57E-06 | 0.999997431 | 1.816901709  | 3.583770968 |
| RAB11FIP4    | 2.54E-06 | 0.999997459 | -2.021550034 | 0.244567926 |
| RAB17        | 2.54E-06 | 0.99999746  | -2.949895663 | 0.129374949 |
| RAB25        | 2.53E-06 | 0.999997466 | -2.509998156 | 0.173666176 |
| RAB26        | 2.53E-06 | 0.999997466 | -1.588186832 | 0.330413506 |
| RAB27A       | 2.47E-06 | 0.999997527 | -5.078903501 | 0.02058592  |
| RAB27B       | 2.46E-06 | 0.999997541 | -2.333610856 | 0.195767939 |
| RAB34        | 2.46E-06 | 0.999997542 | 1.045017487  | 2.064504985 |
| RAB35        | 2.45E-06 | 0.999997546 | -0.878333433 | 0.543275849 |
| RAB4B        | 2.45E-06 | 0.999997549 | 1.002060389  | 2.00337926  |
| RAB8A        | 2.45E-06 | 0.999997549 | 1.070620551  | 2.102645068 |
| RABEPK       | 2.44E-06 | 0.999997563 | -0.702891799 | 0.614327825 |
| RABGAP1      | 2.39E-06 | 0.999997611 | -3.193267499 | 0.106347535 |
| RABGAP1L-IT1 | 2.38E-06 | 0.999997617 | -1.627752443 | 0.323270225 |
| RABGGTB      | 2.38E-06 | 0.999997625 | 1.659701528  | 3.161167042 |
| RABL2A       | 2.37E-06 | 0.999997634 | 0.799961286  | 1.742183342 |
| RAC3         | 2.34E-06 | 0.999997661 | 0.813312646  | 1.761646263 |
| RACGAP1      | 2.33E-06 | 0.999997666 | 1.802373971  | 3.498066717 |
| RAD51        | 2.33E-06 | 0.999997668 | 2.019089932  | 4.058151598 |
| RAD51AP1     | 2.32E-06 | 0.999997684 | -2.806032306 | 0.131221347 |
| RAD51B       | 2.31E-06 | 0.999997693 | -1.856765392 | 0.268549139 |
| RAD54L       | 2.29E-06 | 0.999997714 | -2.176867602 | 0.219285438 |
| RAE1         | 2.25E-06 | 0.999997749 | -2.178664647 | 0.216180595 |
| RAG1         | 2.24E-06 | 0.999997761 | 0.585951381  | 1.501302006 |
| RALGPS1      | 2.21E-06 | 0.999997785 | -3.496782742 | 0.085610159 |
| RALYL        | 2.21E-06 | 0.999997794 | -0.953976083 | 0.5159025   |
| RAN          | 2.18E-06 | 0.999997823 | 1.255170544  | 2.388094162 |
| RANBP1       | 2.17E-06 | 0.999997833 | 1.253769272  | 2.385471802 |
| RANP1        | 2.16E-06 | 0.999997839 | -3.048148685 | 0.117337422 |
| RAP1AP       | 2.16E-06 | 0.999997842 | 1.511659045  | 2.864396057 |
| RAP2C-AS1    | 2.15E-06 | 0.999997848 | 2.045074705  | 4.147546576 |
| RAPGEF2      | 2.15E-06 | 0.999997853 | 1.277084738  | 2.424173916 |
| RAPGEF4-AS1  | 2.14E-06 | 0.999997858 | 1.942953367  | 3.879342647 |
| RAPH1        | 2.14E-06 | 0.999997861 | 1.251167642  | 2.389253999 |
| RASAL2       | 2.13E-06 | 0.999997872 | -2.88751853  | 0.133368802 |
| RASAL2-AS1   | 2.12E-06 | 0.999997883 | -1.137927887 | 0.454291732 |
| RASGEF1B     | 2.11E-06 | 0.999997893 | 2.236647714  | 4.887056364 |
| RASGRF2      | 2.11E-06 | 0.999997895 | 1.510442458  | 2.854435261 |
| RASGRP3      | 2.10E-06 | 0.999997899 | -4.198062831 | 0.048734396 |
| RASL10B      | 2.10E-06 | 0.999997903 | 1.420700729  | 2.702021667 |
| RASL11B      | 2.10E-06 | 0.999997903 | -1.264419666 | 0.416248775 |
| RASSF1       | 2.10E-06 | 0.999997905 | -1.50987721  | 0.347573306 |
| RASSF10      | 2.09E-06 | 0.999997911 | 1.484889217  | 2.804561193 |
| RASSF4       | 2.08E-06 | 0.999997919 | -2.03443131  | 0.236670532 |
| RASSF6       | 2.08E-06 | 0.99999792  | -1.603444707 | 0.321468024 |
| RASSF8       | 2.08E-06 | 0.999997922 | -1.76982077  | 0.285182374 |
| RASSF8-AS1   | 2.05E-06 | 0.999997947 | -1.555649071 | 0.33399545  |
| RASSF9       | 2.05E-06 | 0.999997954 | -1.735993969 | 0.29604481  |
| RBBPAP1      | 2.03E-06 | 0.999997974 | -1.934742164 | 0.249317959 |
| RBCK1        | 2.01E-06 | 0.999997989 | -4.404231989 | 0.045847997 |
| RBF0X2       | 1.99E-06 | 0.999998012 | -1.62907987  | 0.323017687 |
| RBM28        | 1.99E-06 | 0.999998014 | 1.141224754  | 2.206040505 |
| RBM3         | 1.97E-06 | 0.999998031 | 0.587282252  | 1.50272661  |
| RBM38        | 1.96E-06 | 0.999998038 | 1.068440732  | 2.103317888 |
| RBMS2        | 1.96E-06 | 0.999998045 | 0.988338147  | 1.984791516 |
| RBMS3        | 1.95E-06 | 0.999998048 | -1.338999846 | 0.391596204 |

|            |          |             |              |             |
|------------|----------|-------------|--------------|-------------|
| RBMS3-AS2  | 1.93E-06 | 0.999998065 | 0.582159826  | 1.497302846 |
| RBMX2      | 1.93E-06 | 0.999998075 | 0.601311293  | 1.517294141 |
| RBP4       | 1.91E-06 | 0.999998092 | 0.580315709  | 1.495250306 |
| RBPMS      | 1.84E-06 | 0.999998165 | 1.116174588  | 2.170248747 |
| RCAN3      | 1.83E-06 | 0.999998167 | -1.426005593 | 0.370147573 |
| RCBTB2     | 1.81E-06 | 0.999998191 | -1.664755349 | 0.309135325 |
| RCC1       | 1.77E-06 | 0.999998231 | 0.554844182  | 1.469474186 |
| RCC2       | 1.75E-06 | 0.999998253 | 1.145850426  | 2.213833266 |
| RCCD1      | 1.74E-06 | 0.999998258 | -1.2519938   | 0.417365483 |
| RCL1       | 1.73E-06 | 0.999998267 | -0.982232197 | 0.505000145 |
| RCN1       | 1.72E-06 | 0.999998282 | 0.560968034  | 1.475408534 |
| RCOR2      | 1.71E-06 | 0.999998286 | -2.094352168 | 0.23357335  |
| RECK       | 1.71E-06 | 0.999998293 | 2.152387997  | 4.682822355 |
| RECQL4     | 1.70E-06 | 0.999998295 | -2.534401212 | 0.154251436 |
| RELL1      | 1.68E-06 | 0.99999832  | 1.281860728  | 2.432432779 |
| RELT       | 1.66E-06 | 0.999998341 | 1.101275568  | 2.146541148 |
| REPIN1     | 1.66E-06 | 0.999998342 | -0.776185813 | 0.583732025 |
| RER1       | 1.61E-06 | 0.99999839  | 1.366827652  | 2.607138234 |
| RERG       | 1.61E-06 | 0.999998391 | 1.360891824  | 2.56857826  |
| RERG-AS1   | 1.60E-06 | 0.999998401 | -2.323617073 | 0.191115098 |
| RERG-IT1   | 1.60E-06 | 0.999998403 | -1.603284899 | 0.325019455 |
| REXO4      | 1.57E-06 | 0.999998427 | -5.738562152 | 0.012355623 |
| RFC2       | 1.57E-06 | 0.999998432 | 1.415501625  | 2.668824149 |
| RFC3       | 1.55E-06 | 0.99999845  | 1.442941441  | 2.718909364 |
| RFT1       | 1.54E-06 | 0.999998457 | -2.21508537  | 0.200981401 |
| RFK3-AS1   | 1.53E-06 | 0.99999847  | 0.748421299  | 1.681090121 |
| RFX5       | 1.52E-06 | 0.999998477 | 0.575441686  | 1.490611542 |
| RGCC       | 1.51E-06 | 0.999998492 | -2.527829217 | 0.171247956 |
| RL3        | 1.51E-06 | 0.999998494 | 0.77548281   | 1.711947779 |
| RG510      | 1.48E-06 | 0.999998515 | 0.677758974  | 1.600521289 |
| RG516      | 1.48E-06 | 0.99999852  | 1.582553577  | 3.015276792 |
| RG56       | 1.48E-06 | 0.999998521 | 0.808554998  | 1.752235292 |
| RG59       | 1.45E-06 | 0.999998554 | 0.923382101  | 1.902218486 |
| RHBD03     | 1.44E-06 | 0.999998559 | 1.393276503  | 2.627128915 |
| RHBDL2     | 1.43E-06 | 0.999998566 | 0.94922295   | 1.931670046 |
| RHOB       | 1.42E-06 | 0.999998578 | -1.772865642 | 0.282080461 |
| RHOD       | 1.42E-06 | 0.999998579 | 1.236149418  | 2.364244459 |
| RHOJ       | 1.41E-06 | 0.999998593 | 0.922664583  | 1.897146893 |
| RHOU       | 1.41E-06 | 0.999998594 | -0.657851994 | 0.633788455 |
| RIMS1      | 1.39E-06 | 0.999998607 | -1.176177077 | 0.442395038 |
| RIOK1      | 1.38E-06 | 0.999998618 | -1.336172706 | 0.39384411  |
| RIPK1      | 1.37E-06 | 0.999998635 | -3.411741184 | 0.092918788 |
| RITA1      | 1.35E-06 | 0.999998652 | -0.688470906 | 0.620352754 |
| RLIMP1     | 1.35E-06 | 0.999998654 | -1.384903936 | 0.380679871 |
| RMND1      | 1.34E-06 | 0.999998659 | 1.586132785  | 3.003629343 |
| RMST       | 1.33E-06 | 0.999998671 | 0.597402275  | 1.513382133 |
| RN7SKP240  | 1.33E-06 | 0.999998674 | -3.403275068 | 0.083845473 |
| RN7SKP96   | 1.33E-06 | 0.999998675 | -2.207671313 | 0.207503641 |
| RN7SL3     | 1.31E-06 | 0.999998688 | 0.888820756  | 1.852351045 |
| RN7SL330P  | 1.30E-06 | 0.999998696 | 1.335587411  | 2.523917994 |
| RN7SL368P  | 1.29E-06 | 0.999998705 | 0.747068633  | 1.680001482 |
| RN7SL413P  | 1.29E-06 | 0.99999871  | 1.602595225  | 3.055953266 |
| RN7SL471P  | 1.28E-06 | 0.999998723 | 1.414061647  | 2.707237531 |
| RN7SL473P  | 1.27E-06 | 0.999998729 | -3.54043522  | 0.072664922 |
| RN7SL600P  | 1.27E-06 | 0.999998729 | -2.13395184  | 0.21947652  |
| RN7SL648P  | 1.27E-06 | 0.99999873  | -1.304659893 | 0.404250929 |
| RN7SL68P   | 1.27E-06 | 0.999998733 | 1.167512185  | 2.248031622 |
| RNASP118   | 1.26E-06 | 0.999998743 | -3.036254095 | 0.11669052  |
| RNASP160   | 1.26E-06 | 0.999998744 | 2.246186946  | 4.753602227 |
| RNASP304   | 1.24E-06 | 0.999998762 | 1.013387794  | 2.019203831 |
| RNASP354   | 1.23E-06 | 0.999998768 | -1.589541777 | 0.325067197 |
| RNASEH1    | 1.21E-06 | 0.99999879  | 0.951219124  | 1.933848194 |
| RNASEH2A   | 1.21E-06 | 0.999998791 | -1.393871592 | 0.380399851 |
| RNASEL     | 1.20E-06 | 0.999998797 | -0.935569214 | 0.521048578 |
| RNASET2    | 1.18E-06 | 0.99999882  | 1.191573069  | 2.289979626 |
| RNF113A    | 1.17E-06 | 0.999998827 | 1.933887679  | 3.978589332 |
| RNF113B    | 1.15E-06 | 0.999998854 | -2.059546159 | 0.230884029 |
| RNF130     | 1.14E-06 | 0.999998861 | 0.976454063  | 1.968107683 |
| RNF150     | 1.14E-06 | 0.999998864 | 1.156962343  | 2.231976896 |
| RNF152     | 1.12E-06 | 0.999998876 | -3.910662659 | 0.04871508  |
| RNF175     | 1.12E-06 | 0.999998888 | -1.038202814 | 0.486057413 |
| RNF180     | 1.12E-06 | 0.999998881 | -0.69166408  | 0.61809703  |
| RNF181     | 1.12E-06 | 0.999998885 | 1.030540279  | 2.055942275 |
| RNF183     | 1.11E-06 | 0.999998889 | 1.315528393  | 2.489014608 |
| RNF19B     | 1.11E-06 | 0.999998889 | 1.789090316  | 3.564307167 |
| RNF217-AS1 | 1.11E-06 | 0.999998893 | -2.944679078 | 0.112948679 |
| RNF24      | 1.10E-06 | 0.9999989   | -2.043769641 | 0.24114389  |
| RNF4       | 1.09E-06 | 0.999998906 | -2.36260004  | 0.189628624 |
| RNF8       | 1.09E-06 | 0.999998907 | -5.416362487 | 0.018765132 |
| RNMTL1     | 1.08E-06 | 0.999998921 | 1.571563016  | 2.975110262 |
| RNPC3      | 1.06E-06 | 0.999998936 | 1.246967317  | 2.387561122 |
| RNPS1      | 1.06E-06 | 0.999998938 | 0.978774295  | 1.970868387 |
| RNU1-122P  | 1.06E-06 | 0.999998943 | -1.60149571  | 0.327183573 |
| RNU1-59P   | 1.06E-06 | 0.999998943 | -1.859634238 | 0.266307688 |
| RNU1-60P   | 1.05E-06 | 0.99999895  | -1.737521727 | 0.294169776 |
| RNU1-85P   | 1.03E-06 | 0.999998971 | -1.20319286  | 0.433854751 |
| RNU2-25P   | 1.03E-06 | 0.999998972 | -1.625372462 | 0.323550331 |
| RNU2-5P    | 1.03E-06 | 0.999998973 | -2.495623064 | 0.170440108 |
| RNU2-63P   | 1.02E-06 | 0.999998977 | -3.395594068 | 0.092656284 |
| RNU4-22P   | 1.01E-06 | 0.99999899  | 0.942827621  | 1.92499054  |
| RNU5A-8P   | 1.00E-06 | 0.999998995 | 0.579983194  | 1.495507381 |
| RNU5F-1    | 9.98E-07 | 0.999999002 | -3.176273202 | 0.103034409 |
| RNU6-1099P | 9.90E-07 | 0.99999901  | 0.838134569  | 1.787860099 |

|                 |          |             |              |             |
|-----------------|----------|-------------|--------------|-------------|
| RNU6-171P       | 9.58E-07 | 0.999999042 | -1.727513982 | 0.301423001 |
| RNU6-2          | 9.56E-07 | 0.999999044 | -4.439857626 | 0.045559241 |
| RNU6-377P       | 9.53E-07 | 0.999999047 | -2.207687415 | 0.214966919 |
| RNU6-418P       | 9.44E-07 | 0.999999056 | 1.545748237  | 2.926529155 |
| RNU6-509P       | 9.44E-07 | 0.999999056 | 0.968418161  | 1.957122389 |
| RNU6-674P       | 9.38E-07 | 0.999999062 | 1.498876521  | 2.835322063 |
| RNVU1-13        | 9.32E-07 | 0.999999068 | 1.598105089  | 3.037897769 |
| RNY4P25         | 9.32E-07 | 0.999999068 | -0.761907788 | 0.58921939  |
| ROCK1P1         | 9.26E-07 | 0.999999074 | -1.939329818 | 0.258150782 |
| ROMO1           | 9.01E-07 | 0.999999099 | -1.170954649 | 0.4418125   |
| ROPN1B          | 8.97E-07 | 0.999999103 | 0.804877664  | 1.74802478  |
| ROR1            | 8.85E-07 | 0.999999115 | 1.806942932  | 3.517773429 |
| ROR1-AS1        | 8.84E-07 | 0.999999116 | -2.91632341  | 0.108562228 |
| ROS1            | 8.71E-07 | 0.999999129 | 1.495202583  | 2.827218669 |
| RP1             | 8.65E-07 | 0.999999135 | -1.826393976 | 0.276139909 |
| RP1-102G20.5    | 8.63E-07 | 0.999999137 | 1.344725544  | 2.540646223 |
| RP11-1023L17.2  | 8.61E-07 | 0.999999139 | -0.56725952  | 0.674820925 |
| RP11-102G14.1   | 8.50E-07 | 0.99999915  | 0.912092426  | 1.882125083 |
| RP11-104N10.2   | 8.47E-07 | 0.999999153 | -1.594729844 | 0.330109989 |
| RP11-1060G2.2   | 8.35E-07 | 0.999999165 | -1.312188807 | 0.402017737 |
| RP11-107M16.2   | 8.29E-07 | 0.999999171 | 2.101136036  | 4.302390829 |
| RP11-1094M14.11 | 8.21E-07 | 0.999999179 | 0.755633926  | 1.688639421 |
| RP11-109D20.1   | 8.21E-07 | 0.999999179 | -1.465845904 | 0.358273306 |
| RP11-109I4.1    | 8.21E-07 | 0.999999179 | 0.532030876  | 1.44646591  |
| RP11-10K16.1    | 8.17E-07 | 0.999999183 | 0.794782809  | 1.736669862 |
| RP11-1105O14.1  | 8.03E-07 | 0.999999197 | 1.010279414  | 2.016044751 |
| RP11-1109F11.3  | 8.02E-07 | 0.999999198 | 0.692803224  | 1.616797074 |
| RP11-1114A5.4   | 7.98E-07 | 0.999999202 | -1.398115928 | 0.378275371 |
| RP11-111F16.2   | 7.97E-07 | 0.999999203 | -1.015630046 | 0.494518639 |
| RP11-1124B17.1  | 7.97E-07 | 0.999999203 | -0.631425153 | 0.645075155 |
| RP11-112I3.16   | 7.96E-07 | 0.999999204 | 0.872708497  | 1.835823952 |
| RP11-112L18.1   | 7.85E-07 | 0.999999215 | -2.72549443  | 0.128294503 |
| RP11-1136G4.2   | 7.78E-07 | 0.999999222 | 1.551272615  | 2.93604572  |
| RP11-114F10.2   | 7.77E-07 | 0.999999223 | -2.420130662 | 0.186321164 |
| RP11-114F10.3   | 7.73E-07 | 0.999999227 | -2.510820179 | 0.171842382 |
| RP11-114F3.5    | 7.66E-07 | 0.999999234 | 1.196241619  | 2.291467882 |
| RP11-1152H14.1  | 7.64E-07 | 0.999999236 | 0.679777029  | 1.602263829 |
| RP11-1160I8.1   | 7.64E-07 | 0.999999236 | -2.515047338 | 0.158912277 |
| RP11-119H12.4   | 7.60E-07 | 0.99999924  | -0.936892328 | 0.52226649  |
| RP11-11C20.3    | 7.59E-07 | 0.999999241 | 1.0467513    | 2.065932243 |
| RP11-122G18.9   | 7.58E-07 | 0.999999242 | -2.721820064 | 0.145161742 |
| RP11-123K19.1   | 7.51E-07 | 0.999999249 | 1.512493627  | 2.853569698 |
| RP11-131L12.3   | 7.49E-07 | 0.999999251 | 2.010324115  | 4.127643395 |
| RP11-1334A24.5  | 7.39E-07 | 0.999999261 | 1.300245106  | 2.464851073 |
| RP11-134G8.5    | 7.35E-07 | 0.999999265 | 1.496484544  | 2.823108591 |
| RP11-134G8.7    | 7.30E-07 | 0.99999927  | -2.061327436 | 0.237999776 |
| RP11-135J2.3    | 7.29E-07 | 0.999999271 | 1.377817848  | 2.629728328 |
| RP11-135N5.3    | 7.15E-07 | 0.999999285 | -1.583273564 | 0.32752548  |
| RP11-138H8.2    | 7.13E-07 | 0.999999287 | -2.37014459  | 0.18649611  |
| RP11-138L1.3    | 6.91E-07 | 0.999999309 | -3.248087378 | 0.086054532 |
| RP11-139K1.2    | 6.77E-07 | 0.999999323 | -0.981448239 | 0.505936617 |
| RP11-140H17.2   | 6.75E-07 | 0.999999325 | 0.950393709  | 1.933278098 |
| RP11-141M3.6    | 6.67E-07 | 0.999999333 | 0.726846871  | 1.655399693 |
| RP11-145A3.1    | 6.64E-07 | 0.999999336 | 3.78467878   | 14.77910156 |
| RP11-145A3.2    | 6.56E-07 | 0.999999344 | -1.835818863 | 0.277569854 |
| RP11-147L13.11  | 6.39E-07 | 0.999999361 | -1.62203035  | 0.31649013  |
| RP11-147L13.12  | 6.37E-07 | 0.999999363 | 1.155866199  | 2.236255803 |
| RP11-147L13.7   | 6.36E-07 | 0.999999364 | -3.101012783 | 0.107526183 |
| RP11-147L13.8   | 6.33E-07 | 0.999999367 | -2.926671666 | 0.130322924 |
| RP11-152L20.3   | 6.32E-07 | 0.999999368 | 1.044410306  | 2.065479313 |
| RP11-153M7.5    | 6.27E-07 | 0.999999373 | -0.694736754 | 0.617699658 |
| RP11-154D6.1    | 6.24E-07 | 0.999999376 | 0.808535405  | 1.752098604 |
| RP11-154H23.3   | 6.24E-07 | 0.999999376 | 1.04582789   | 2.06648746  |
| RP11-157H4.1    | 6.15E-07 | 0.999999385 | -1.583363179 | 0.332945509 |
| RP11-157J24.1   | 6.05E-07 | 0.999999395 | 1.847822297  | 3.647630381 |
| RP11-158H5.8    | 6.04E-07 | 0.999999396 | -2.800356863 | 0.12781355  |
| RP11-159D12.2   | 5.87E-07 | 0.999999413 | -1.25845366  | 0.414903287 |
| RP11-159D23.2   | 5.84E-07 | 0.999999416 | 0.656001677  | 1.576511124 |
| RP11-159F24.3   | 5.81E-07 | 0.999999419 | -0.95680643  | 0.513874701 |
| RP11-159F24.5   | 5.80E-07 | 0.99999942  | 2.131664403  | 4.407849854 |
| RP11-159F24.6   | 5.76E-07 | 0.999999424 | 0.911731791  | 1.886202749 |
| RP11-15A1.2     | 5.74E-07 | 0.999999426 | 1.174562912  | 2.264246828 |
| RP11-15A1.8     | 5.67E-07 | 0.999999433 | 1.213273037  | 2.31909132  |
| RP11-15A1.9     | 5.66E-07 | 0.999999434 | 0.766243026  | 1.702494737 |
| RP11-15E18.5    | 5.58E-07 | 0.999999442 | -0.993077109 | 0.502226527 |
| RP11-15F12.6    | 5.54E-07 | 0.999999446 | -1.571016833 | 0.336342676 |
| RP11-15H20.6    | 5.43E-07 | 0.999999457 | -0.83323035  | 0.561124716 |
| RP11-15M15.1    | 5.43E-07 | 0.999999457 | -1.215810009 | 0.427675599 |
| RP11-15M15.2    | 5.42E-07 | 0.999999458 | 1.256719877  | 2.390274593 |
| RP11-164I13.1   | 5.41E-07 | 0.999999459 | 0.860095585  | 1.821194896 |
| RP11-164N3.3    | 5.41E-07 | 0.999999459 | 0.728344025  | 1.658234486 |
| RP11-164P12.3   | 5.39E-07 | 0.999999461 | 1.640330812  | 3.117903363 |
| RP11-166D19.1   | 5.37E-07 | 0.999999463 | 1.363930252  | 2.574017734 |
| RP11-166O4.6    | 5.32E-07 | 0.999999468 | -1.016091018 | 0.493420686 |
| RP11-16E23.4    | 5.27E-07 | 0.999999473 | 1.02441294   | 2.03625655  |
| RP11-16P6.1     | 5.26E-07 | 0.999999474 | -2.987901369 | 0.125534712 |
| RP11-174G6.1    | 5.26E-07 | 0.999999474 | 0.83277257   | 1.78210065  |
| RP11-174G6.5    | 5.20E-07 | 0.99999948  | -0.598343024 | 0.66000372  |
| RP11-174O3.3    | 5.19E-07 | 0.999999481 | 0.672258405  | 1.593602487 |
| RP11-177G23.1   | 5.16E-07 | 0.999999484 | -1.411987312 | 0.37500221  |
| RP11-177H13.2   | 5.15E-07 | 0.999999485 | -1.251425622 | 0.415686614 |
| RP11-17A4.2     | 5.14E-07 | 0.999999486 | -1.198245302 | 0.435704738 |
| RP11-181E10.3   | 5.12E-07 | 0.999999488 | -1.54900683  | 0.340896096 |

|                |          |             |              |              |
|----------------|----------|-------------|--------------|--------------|
| RP11-182J1.14  | 5.10E-07 | 0.99999949  | -1.788237408 | 0.289153874  |
| RP11-188P20.3  | 4.99E-07 | 0.999999501 | 0.707982063  | 1.636541541  |
| RP11-190A12.8  | 4.98E-07 | 0.999999502 | -2.981201782 | 0.125199274  |
| RP11-197K3.1   | 4.96E-07 | 0.999999504 | -1.113050214 | 0.46212671   |
| RP11-201E8.1   | 4.93E-07 | 0.999999507 | -1.323593265 | 0.398015013  |
| RP11-203H19.2  | 4.92E-07 | 0.999999508 | 0.580851783  | 1.496450871  |
| RP11-204C16.4  | 4.86E-07 | 0.999999514 | 1.119550137  | 2.173003134  |
| RP11-2020.4    | 4.81E-07 | 0.999999519 | -2.611043108 | 0.155576154  |
| RP11-210M15.2  | 4.77E-07 | 0.999999523 | -2.249296073 | 0.196843662  |
| RP11-211A18.2  | 4.76E-07 | 0.999999524 | 1.637174741  | 3.146811484  |
| RP11-211G23.2  | 4.70E-07 | 0.99999953  | 0.75712882   | 1.691346252  |
| RP11-212I21.4  | 4.69E-07 | 0.999999531 | -1.841547868 | 0.278432486  |
| RP11-214K3.18  | 4.65E-07 | 0.999999535 | 1.214589847  | 2.321379696  |
| RP11-214K3.20  | 4.64E-07 | 0.999999536 | 1.361879084  | 2.570481695  |
| RP11-214K3.21  | 4.63E-07 | 0.999999537 | 2.017654497  | 4.296594377  |
| RP11-214O1.3   | 4.63E-07 | 0.999999537 | -2.019197985 | 0.243264517  |
| RP11-215P8.2   | 4.62E-07 | 0.999999538 | 1.13062554   | 2.189642342  |
| RP11-219B4.5   | 4.61E-07 | 0.999999539 | 1.416569308  | 2.669660807  |
| RP11-219B4.6   | 4.57E-07 | 0.999999543 | -0.874878413 | 0.545256928  |
| RP11-227G15.11 | 4.55E-07 | 0.999999545 | 1.185324865  | 2.274437527  |
| RP11-229O3.1   | 4.39E-07 | 0.999999561 | 0.697802398  | 1.622069192  |
| RP11-22A3.1    | 4.38E-07 | 0.999999562 | -2.48144045  | 0.177497655  |
| RP11-22A3.2    | 4.37E-07 | 0.999999563 | -0.71994853  | 0.606104783  |
| RP11-22B23.1   | 4.36E-07 | 0.999999564 | 1.406754632  | 2.656723127  |
| RP11-222P22.2  | 4.33E-07 | 0.999999567 | -3.430513099 | 0.092627066  |
| RP11-230B22.1  | 4.22E-07 | 0.999999578 | -1.82521331  | 0.278444314  |
| RP11-230F18.5  | 4.17E-07 | 0.999999583 | 0.822385281  | 1.768757885  |
| RP11-234A1.1   | 4.16E-07 | 0.999999584 | -3.487740516 | 0.066759191  |
| RP11-234K24.3  | 4.13E-07 | 0.999999587 | 1.180261528  | 2.26622588   |
| RP11-234K24.6  | 4.05E-07 | 0.999999595 | 1.100689486  | 2.144681368  |
| RP11-23D24.2   | 4.04E-07 | 0.999999596 | 1.251911028  | 2.38806495   |
| RP11-243I16.7  | 4.03E-07 | 0.999999597 | -1.011643672 | 0.495484057  |
| RP11-244F12.3  | 4.03E-07 | 0.999999597 | 1.262025568  | 2.40049303   |
| RP11-244H3.1   | 4.00E-07 | 0.9999996   | -2.0656041   | 0.224931917  |
| RP11-244M2.1   | 3.98E-07 | 0.999999602 | -0.686132481 | 0.621438482  |
| RP11-246E12.2  | 3.97E-07 | 0.999999603 | -1.991826802 | 0.243166354  |
| RP11-248J23.6  | 3.92E-07 | 0.999999608 | 0.704319472  | 1.631409784  |
| RP11-253E3.3   | 3.86E-07 | 0.999999614 | -1.460516849 | 0.362502135  |
| RP11-254F7.4   | 3.86E-07 | 0.999999614 | 1.599857172  | 3.043973454  |
| RP11-255H23.2  | 3.84E-07 | 0.999999616 | 1.092832275  | 2.133309612  |
| RP11-255H23.5  | 3.80E-07 | 0.99999962  | 1.080062568  | 2.115616229  |
| RP11-259N19.1  | 3.79E-07 | 0.999999621 | 1.279281599  | 2.428129889  |
| RP11-259O2.1   | 3.79E-07 | 0.999999621 | -1.852656357 | 0.265794624  |
| RP11-259O2.2   | 3.78E-07 | 0.999999622 | 0.876451555  | 1.8399949676 |
| RP11-259O2.3   | 3.69E-07 | 0.999999631 | -1.780910472 | 0.290763016  |
| RP11-25D3.1    | 3.64E-07 | 0.999999636 | -0.787713844 | 0.579178311  |
| RP11-264I13.2  | 3.64E-07 | 0.999999636 | -2.239635254 | 0.211454305  |
| RP11-266K4.13  | 3.59E-07 | 0.999999641 | -0.927139383 | 0.525087223  |
| RP11-266K4.14  | 3.56E-07 | 0.999999644 | -0.994069389 | 0.500945902  |
| RP11-266L9.5   | 3.55E-07 | 0.999999645 | 1.344667843  | 2.539807756  |
| RP11-269F20.1  | 3.53E-07 | 0.999999647 | 1.396854591  | 2.646730011  |
| RP11-272D12.2  | 3.45E-07 | 0.999999655 | -0.905937044 | 0.533108087  |
| RP11-274J7.3   | 3.42E-07 | 0.999999658 | -1.593711067 | 0.330917907  |
| RP11-276H19.1  | 3.38E-07 | 0.999999662 | 1.239185622  | 2.36202384   |
| RP11-277P12.20 | 3.27E-07 | 0.999999673 | 0.999005061  | 1.999044229  |
| RP11-127D3.4   | 3.27E-07 | 0.999999673 | -0.92866529  | 0.524900648  |
| RP11-282K24.3  | 3.24E-07 | 0.999999676 | -3.413939023 | 0.093160075  |
| RP11-282O18.3  | 3.24E-07 | 0.999999676 | -2.487394312 | 0.175608647  |
| RP11-283G6.4   | 3.23E-07 | 0.999999677 | -3.023321277 | 0.120547629  |
| RP11-283I3.6   | 3.19E-07 | 0.999999681 | 0.521366861  | 1.435428581  |
| RP11-285A1.1   | 3.19E-07 | 0.999999681 | -3.077428191 | 0.112641034  |
| RP11-285F7.2   | 3.16E-07 | 0.999999684 | 0.663339968  | 1.584329665  |
| RP11-285I16.1  | 3.15E-07 | 0.999999685 | 2.712180767  | 6.781791413  |
| RP11-286B14.1  | 3.13E-07 | 0.999999687 | -2.179205933 | 0.214584533  |
| RP11-286B14.2  | 3.10E-07 | 0.99999969  | -0.957865928 | 0.514423734  |
| RP11-286N22.16 | 3.07E-07 | 0.999999693 | -2.358295769 | 0.194397797  |
| RP11-287J9.1   | 3.03E-07 | 0.999999697 | 1.919733175  | 3.871217053  |
| RP11-288C18.1  | 3.01E-07 | 0.999999699 | -2.29944104  | 0.191116498  |
| RP11-288L9.4   | 2.97E-07 | 0.999999703 | -1.609619287 | 0.320128964  |
| RP11-290O12.2  | 2.95E-07 | 0.999999705 | -1.117201098 | 0.457762831  |
| RP11-292E2.1   | 2.94E-07 | 0.999999706 | -1.533955891 | 0.341357925  |
| RP11-292F22.7  | 2.90E-07 | 0.99999971  | -1.669457622 | 0.313950717  |
| RP11-295G20.2  | 2.87E-07 | 0.999999713 | 0.537629338  | 1.451842498  |
| RP11-295K2.3   | 2.85E-07 | 0.999999715 | 0.72283207   | 1.652296581  |
| RP11-295P9.3   | 2.84E-07 | 0.999999716 | -1.524476698 | 0.346704289  |
| RP11-298C2.1   | 2.84E-07 | 0.999999716 | -1.288812146 | 0.408544773  |
| RP11-298I3.3   | 2.78E-07 | 0.999999722 | -2.094397891 | 0.229686294  |
| RP11-299M14.2  | 2.78E-07 | 0.999999722 | 1.609154561  | 3.051984391  |
| RP11-29G8.3    | 2.78E-07 | 0.999999722 | -3.388838517 | 0.093352166  |
| RP11-29H23.5   | 2.74E-07 | 0.999999726 | -1.112645339 | 0.46180058   |
| RP11-2C24.9    | 2.74E-07 | 0.999999726 | -1.435091696 | 0.367914424  |
| RP11-304C12.5  | 2.73E-07 | 0.999999727 | 1.578066669  | 2.996263383  |
| RP11-305L7.7   | 2.70E-07 | 0.99999973  | 1.537450816  | 2.902936607  |
| RP11-305O6.3   | 2.66E-07 | 0.999999734 | 1.128910037  | 2.187189614  |
| RP11-310H4.6   | 2.64E-07 | 0.999999736 | -2.614056498 | 0.163268044  |
| RP11-310I24.1  | 2.63E-07 | 0.999999737 | -0.682221184 | 0.62262926   |
| RP11-311B14.1  | 2.59E-07 | 0.999999741 | -0.762203204 | 0.588998513  |
| RP11-317B17.4  | 2.59E-07 | 0.999999741 | 0.673825817  | 1.595550729  |
| RP11-318C2.1   | 2.58E-07 | 0.999999742 | 1.269701675  | 2.417501091  |
| RP11-319G9.3   | 2.58E-07 | 0.999999742 | -2.53918435  | 0.161652917  |
| RP11-321G12.1  | 2.56E-07 | 0.999999744 | 0.970559543  | 1.962305359  |
| RP11-323C15.2  | 2.52E-07 | 0.999999748 | 1.894656189  | 3.731000715  |
| RP11-323F24.4  | 2.51E-07 | 0.999999749 | -3.225130989 | 0.081595809  |



|                |          |             |              |             |
|----------------|----------|-------------|--------------|-------------|
| RP11-327017.2  | 2.51E-07 | 0.999999749 | -2.34639754  | 0.194482945 |
| RP11-329N15.3  | 2.50E-07 | 0.99999975  | -1.123363356 | 0.458748428 |
| RP11-3285.1    | 2.49E-07 | 0.999999751 | 1.736006836  | 3.335768864 |
| RP11-332H14.2  | 2.49E-07 | 0.999999751 | 1.416310512  | 2.669431476 |
| RP11-333E1.1   | 2.47E-07 | 0.999999753 | -1.283088311 | 0.410525286 |
| RP11-334C17.6  | 2.46E-07 | 0.999999754 | 1.214551509  | 2.321761387 |
| RP11-336K24.12 | 2.44E-07 | 0.999999756 | 0.883389747  | 1.844769751 |
| RP11-337C18.8  | 2.44E-07 | 0.999999756 | 0.740766174  | 1.671512614 |
| RP11-337C18.9  | 2.43E-07 | 0.999999757 | 1.065548311  | 2.094077137 |
| RP11-344N10.4  | 2.40E-07 | 0.99999976  | 1.798131888  | 3.551080454 |
| RP11-346E8.1   | 2.36E-07 | 0.999999764 | 1.002387831  | 2.007900738 |
| RP11-347D21.1  | 2.35E-07 | 0.999999765 | 1.728797749  | 3.320061249 |
| RP11-347P5.1   | 2.34E-07 | 0.999999766 | 0.801697901  | 1.743621734 |
| RP11-349F21.2  | 2.34E-07 | 0.999999766 | 1.267775191  | 2.43300618  |
| RP11-34A14.3   | 2.33E-07 | 0.999999767 | 2.075676029  | 4.287889234 |
| RP11-350G24.2  | 2.32E-07 | 0.999999768 | -3.490459278 | 0.080776416 |
| RP11-351I21.6  | 2.31E-07 | 0.999999769 | -0.712909012 | 0.609909321 |
| RP11-351I21.7  | 2.25E-07 | 0.999999775 | -2.316174266 | 0.200282516 |
| RP11-351J23.1  | 2.19E-07 | 0.999999781 | -5.0948182   | 0.028828266 |
| RP11-351O1.4   | 2.17E-07 | 0.999999783 | 0.926334587  | 1.901070265 |
| RP11-352M15.2  | 2.17E-07 | 0.999999783 | -1.802279377 | 0.284838486 |
| RP11-355F16.1  | 2.15E-07 | 0.999999785 | 1.51158366   | 2.851653556 |
| RP11-356J5.12  | 2.13E-07 | 0.999999787 | -1.309185235 | 0.401162108 |
| RP11-357N13.3  | 2.13E-07 | 0.999999787 | -3.422514837 | 0.082257069 |
| RP11-357N13.6  | 2.12E-07 | 0.999999788 | -1.55997039  | 0.336927073 |
| RP11-358D17.2  | 2.09E-07 | 0.999999791 | -2.168335455 | 0.219771533 |
| RP11-35G22.1   | 2.09E-07 | 0.999999791 | 1.078277475  | 2.11548719  |
| RP11-35I10.4   | 2.06E-07 | 0.999999794 | 1.28212949   | 2.435753073 |
| RP11-35I10.6   | 2.04E-07 | 0.999999796 | 1.117517582  | 2.170030765 |
| RP11-35I10.7   | 2.04E-07 | 0.999999796 | 0.871100223  | 1.829174298 |
| RP11-35I17.3   | 2.03E-07 | 0.999999797 | -0.711880002 | 0.61020661  |
| RP11-360F5.1   | 2.01E-07 | 0.999999799 | 1.021807619  | 2.030570079 |
| RP11-364P22.1  | 1.98E-07 | 0.999999802 | 1.140528165  | 2.2056721   |
| RP11-365D23.4  | 1.98E-07 | 0.999999802 | 0.925671287  | 1.899766086 |
| RP11-371A22.1  | 1.98E-07 | 0.999999802 | -4.743538646 | 0.021062256 |
| RP11-371I20.2  | 1.98E-07 | 0.999999802 | -2.049208013 | 0.231137986 |
| RP11-376O6.2   | 1.95E-07 | 0.999999805 | -1.202956793 | 0.433378865 |
| RP11-376P6.3   | 1.94E-07 | 0.999999806 | -0.842581855 | 0.55745823  |
| RP11-378G13.2  | 1.93E-07 | 0.999999807 | -2.437900626 | 0.171394447 |
| RP11-379B18.5  | 1.93E-07 | 0.999999807 | -0.91778243  | 0.527177291 |
| RP11-37B2.1    | 1.91E-07 | 0.999999809 | -0.918860554 | 0.527834138 |
| RP11-382A20.4  | 1.81E-07 | 0.999999819 | 0.548156777  | 1.462693593 |
| RP11-383G10.5  | 1.81E-07 | 0.999999819 | -0.821941043 | 0.564741781 |
| RP11-392B6.1   | 1.80E-07 | 0.99999982  | -2.623543409 | 0.161980317 |
| RP11-392O17.2  | 1.80E-07 | 0.99999982  | 1.087817423  | 2.125593879 |
| RP11-395I14.2  | 1.76E-07 | 0.999999824 | -2.188564398 | 0.2064729   |
| RP11-395I6.3   | 1.74E-07 | 0.999999826 | -3.74429662  | 0.069849367 |
| RP11-396C23.2  | 1.73E-07 | 0.999999827 | 0.60471976   | 1.520767136 |
| RP11-396C23.4  | 1.70E-07 | 0.99999983  | -1.750071644 | 0.294202755 |
| RP11-387.1     | 1.69E-07 | 0.999999831 | 0.883011174  | 1.844380571 |
| RP11-400K9.4   | 1.69E-07 | 0.999999831 | -2.036746689 | 0.238449623 |
| RP11-403I13.5  | 1.67E-07 | 0.999999833 | -3.078188278 | 0.105079295 |
| RP11-403I13.7  | 1.67E-07 | 0.999999833 | -2.573323111 | 0.167351355 |
| RP11-405L18.4  | 1.66E-07 | 0.999999834 | 0.971732772  | 1.96220324  |
| RP11-407N8.6   | 1.65E-07 | 0.999999835 | 0.601986506  | 1.519440193 |
| RP11-408P14.1  | 1.65E-07 | 0.999999835 | 0.847361135  | 1.799612366 |
| RP11-411K7.1   | 1.63E-07 | 0.999999837 | 0.971159177  | 1.961632015 |
| RP11-415J8.3   | 1.63E-07 | 0.999999837 | 1.185972457  | 2.277499565 |
| RP11-417L19.6  | 1.61E-07 | 0.999999839 | 0.783714595  | 1.721718915 |
| RP11-420A23.1  | 1.61E-07 | 0.999999839 | -1.379670374 | 0.382649356 |
| RP11-423H2.1   | 1.59E-07 | 0.999999841 | -2.717582525 | 0.151528519 |
| RP11-423O2.1   | 1.58E-07 | 0.999999842 | 1.758282403  | 3.425008507 |
| RP11-425L10.1  | 1.58E-07 | 0.999999842 | -1.996870401 | 0.242565788 |
| RP11-427M20.1  | 1.57E-07 | 0.999999843 | -2.877356869 | 0.135740311 |
| RP11-429P3.8   | 1.56E-07 | 0.999999844 | 1.063667178  | 2.096037411 |
| RP11-432I13.6  | 1.55E-07 | 0.999999845 | 1.1835403    | 2.271858973 |
| RP11-434B12.1  | 1.54E-07 | 0.999999846 | -3.058419085 | 0.109528395 |
| RP11-434D9.1   | 1.54E-07 | 0.999999846 | -1.592363865 | 0.330713793 |
| RP11-436H11.5  | 1.54E-07 | 0.999999846 | 1.315336798  | 2.489083647 |
| RP11-439E19.10 | 1.52E-07 | 0.999999848 | 0.772334391  | 1.708992552 |
| RP11-43D2.2    | 1.50E-07 | 0.99999985  | 1.860680346  | 3.663109391 |
| RP11-43D4.3    | 1.47E-07 | 0.999999853 | 1.195169775  | 2.291930069 |
| RP11-440L14.4  | 1.46E-07 | 0.999999854 | 1.688534532  | 3.234756405 |
| RP11-441M10.1  | 1.46E-07 | 0.999999854 | -1.420395687 | 0.371544467 |
| RP11-441O15.3  | 1.44E-07 | 0.999999856 | 1.665479934  | 3.19115216  |
| RP11-445N18.5  | 1.44E-07 | 0.999999856 | 1.227404803  | 2.343893623 |
| RP11-445N18.7  | 1.43E-07 | 0.999999857 | -1.689612791 | 0.306444041 |
| RP11-445P17.8  | 1.42E-07 | 0.999999858 | -4.118941965 | 0.048149671 |
| RP11-446H18.5  | 1.40E-07 | 0.99999986  | 1.908213188  | 3.758401757 |
| RP11-448G15.3  | 1.40E-07 | 0.99999986  | -1.718561528 | 0.301444752 |
| RP11-448G4.4   | 1.38E-07 | 0.999999862 | -2.380319168 | 0.191669454 |
| RP11-449H3.1   | 1.37E-07 | 0.999999863 | -0.665581725 | 0.630268044 |
| RP11-44F14.10  | 1.37E-07 | 0.999999863 | 1.038287059  | 2.057913218 |
| RP11-44F14.2   | 1.35E-07 | 0.999999865 | -2.341709553 | 0.190395722 |
| RP11-44F14.8   | 1.34E-07 | 0.999999866 | -1.654456273 | 0.311303903 |
| RP11-44F14.9   | 1.34E-07 | 0.999999866 | -0.846626783 | 0.555993345 |
| RP11-44F21.5   | 1.33E-07 | 0.999999867 | 0.642762264  | 1.561593846 |
| RP11-44I10.3   | 1.33E-07 | 0.999999867 | -2.023845363 | 0.245644644 |
| RP11-44N21.1   | 1.33E-07 | 0.999999867 | 1.10878038   | 2.158218611 |
| RP11-451F14.1  | 1.33E-07 | 0.999999867 | 0.852946873  | 1.80653927  |
| RP11-452F19.3  | 1.28E-07 | 0.999999872 | -1.978750702 | 0.250153982 |
| RP11-452G18.2  | 1.25E-07 | 0.999999875 | 1.197846841  | 2.294962951 |
| RP11-454F8.2   | 1.24E-07 | 0.999999876 | -0.858713146 | 0.551205583 |

|               |          |             |              |             |
|---------------|----------|-------------|--------------|-------------|
| RP11-457M11.7 | 1.24E-07 | 0.999999876 | -1.981184333 | 0.244260522 |
| RP11-45A17.4  | 1.23E-07 | 0.999999877 | 0.86173242   | 1.817554514 |
| RP11-463O12.5 | 1.23E-07 | 0.999999877 | -1.491189246 | 0.3541795   |
| RP11-467H10.2 | 1.22E-07 | 0.999999878 | 0.963194075  | 1.950143682 |
| RP11-468E2.11 | 1.21E-07 | 0.999999879 | 1.004342971  | 2.016717444 |
| RP11-469J4.3  | 1.20E-07 | 0.99999988  | -3.776910981 | 0.071471551 |
| RP11-46D6.1   | 1.20E-07 | 0.99999988  | -2.178919416 | 0.211534263 |
| RP11-46H11.3  | 1.20E-07 | 0.99999988  | 1.166069435  | 2.248639989 |
| RP11-470B22.1 | 1.19E-07 | 0.999999881 | 1.362806803  | 2.572429235 |
| RP11-475C16.1 | 1.17E-07 | 0.999999883 | 0.705415403  | 1.63326283  |
| RP11-475O6.1  | 1.16E-07 | 0.999999884 | 1.242467059  | 2.387527494 |
| RP11-477H21.2 | 1.16E-07 | 0.999999884 | 2.106399244  | 4.354235514 |
| RP11-477J21.2 | 1.15E-07 | 0.999999885 | -0.671740172 | 0.627011235 |
| RP11-477N3.1  | 1.15E-07 | 0.999999885 | 0.69187032   | 1.617662345 |
| RP11-483L5.1  | 1.15E-07 | 0.999999885 | -0.711570014 | 0.609717473 |
| RP11-486B10.4 | 1.13E-07 | 0.999999887 | -2.00785811  | 0.246391994 |
| RP11-489G11.3 | 1.13E-07 | 0.999999887 | -0.905107478 | 0.53396409  |
| RP11-489M13.1 | 1.11E-07 | 0.999999889 | -1.339139878 | 0.394335907 |
| RP11-48G14.1  | 1.11E-07 | 0.999999889 | -4.129833542 | 0.049791243 |
| RP11-48G14.3  | 1.09E-07 | 0.999999891 | -2.132976904 | 0.227958982 |
| RP11-493E12.2 | 1.07E-07 | 0.999999893 | -4.523749429 | 0.025864399 |
| RP11-494M8.4  | 1.06E-07 | 0.999999894 | 1.647662202  | 3.143995653 |
| RP11-495P10.1 | 1.06E-07 | 0.999999894 | 1.237053675  | 2.364098337 |
| RP11-498C9.15 | 1.06E-07 | 0.999999894 | 0.95389104   | 1.937774374 |
| RP11-49C9.2   | 1.05E-07 | 0.999999895 | -2.843424688 | 0.13450454  |
| RP11-49O14.2  | 1.04E-07 | 0.999999896 | 1.481445475  | 2.794742121 |
| RP11-49O14.3  | 1.04E-07 | 0.999999896 | 1.112474048  | 2.162445912 |
| RP11-506O24.1 | 1.03E-07 | 0.999999897 | 1.141347021  | 2.206826677 |
| RP11-507K2.2  | 1.03E-07 | 0.999999897 | -1.808645729 | 0.284534868 |
| RP11-508M8.1  | 1.03E-07 | 0.999999897 | 0.586011491  | 1.502168366 |
| RP11-513G19.1 | 1.02E-07 | 0.999999898 | -0.973658751 | 0.509069285 |
| RP11-517I3.1  | 1.01E-07 | 0.999999899 | 1.262909013  | 2.407151657 |
| RP11-517I3.2  | 1.01E-07 | 0.999999899 | -1.64003494  | 0.320194415 |
| RP11-520H14.7 | 9.96E-08 | 0.9999999   | -3.199316644 | 0.108009337 |
| RP11-521B24.5 | 9.90E-08 | 0.999999901 | -1.730589323 | 0.301201248 |
| RP11-522M21.2 | 9.69E-08 | 0.999999903 | 1.314550592  | 2.507025021 |
| RP11-522M21.3 | 9.45E-08 | 0.999999905 | -1.231142102 | 0.424396508 |
| RP11-523H24.3 | 9.44E-08 | 0.999999906 | 1.297926019  | 2.473251684 |
| RP11-525G13.2 | 9.35E-08 | 0.999999907 | 0.965627273  | 1.953500863 |
| RP11-526D8.11 | 9.24E-08 | 0.999999908 | 2.352401573  | 5.120822717 |
| RP11-526F3.1  | 9.23E-08 | 0.999999908 | 1.06827375   | 2.097289239 |
| RP11-530N7.3  | 9.22E-08 | 0.999999908 | -1.426682252 | 0.371815376 |
| RP11-531A24.5 | 8.85E-08 | 0.999999912 | -2.754790357 | 0.1473071   |
| RP11-532M24.1 | 8.56E-08 | 0.999999914 | -1.021878515 | 0.492351621 |
| RP11-535A19.2 | 8.53E-08 | 0.999999915 | 1.476367486  | 2.788073474 |
| RP11-53B2.1   | 8.50E-08 | 0.999999915 | 1.35017556   | 2.555903985 |
| RP11-53B2.2   | 8.45E-08 | 0.999999915 | -2.580434377 | 0.163744207 |
| RP11-53B2.3   | 8.44E-08 | 0.999999916 | -1.414184541 | 0.37458445  |
| RP11-53B2.4   | 8.42E-08 | 0.999999916 | 0.847029663  | 1.799180555 |
| RP11-53B2.5   | 8.19E-08 | 0.999999918 | -0.826827666 | 0.563289224 |
| RP11-53B2.6   | 8.14E-08 | 0.999999919 | 1.664545404  | 3.175930566 |
| RP11-53M11.3  | 7.96E-08 | 0.99999992  | 1.354755599  | 2.561374667 |
| RP11-545A16.1 | 7.94E-08 | 0.999999921 | -2.440216607 | 0.182980746 |
| RP11-545I5.3  | 7.94E-08 | 0.999999921 | 1.468304437  | 2.77943946  |
| RP11-546I1.1  | 7.86E-08 | 0.999999921 | -3.917872125 | 0.057509625 |
| RP11-549L6.2  | 7.83E-08 | 0.999999922 | 1.687100307  | 3.224224039 |
| RP11-54H7.4   | 7.82E-08 | 0.999999922 | -2.703263009 | 0.152284354 |
| RP11-54I5.1   | 7.80E-08 | 0.999999922 | -4.588322892 | 0.040284408 |
| RP11-54O15.3  | 7.68E-08 | 0.999999923 | -0.642072996 | 0.640416423 |
| RP11-550I24.2 | 7.54E-08 | 0.999999925 | -5.594576834 | 0.014819493 |
| RP11-551L14.4 | 7.54E-08 | 0.999999925 | 1.471791136  | 2.775219604 |
| RP11-552M6.1  | 7.47E-08 | 0.999999925 | 0.669101544  | 1.591486859 |
| RP11-553L6.5  | 7.47E-08 | 0.999999925 | 0.64419686   | 1.563118232 |
| RP11-557H15.4 | 7.38E-08 | 0.999999926 | 1.419608354  | 2.68112455  |
| RP11-55K13.1  | 7.36E-08 | 0.999999926 | -0.521203832 | 0.696630989 |
| RP11-56A10.1  | 7.34E-08 | 0.999999927 | -0.579606388 | 0.668944403 |
| RP11-56H7.2   | 7.31E-08 | 0.999999927 | -2.433454751 | 0.184694504 |
| RP11-573D15.9 | 7.31E-08 | 0.999999927 | -0.570414021 | 0.673029484 |
| RP11-573N10.1 | 7.21E-08 | 0.999999928 | 1.5253548    | 2.878788448 |
| RP11-575A19.2 | 7.03E-08 | 0.99999993  | -1.485164653 | 0.353075097 |
| RP11-575G13.2 | 6.98E-08 | 0.99999993  | -2.620725137 | 0.16127685  |
| RP11-577H5.1  | 6.89E-08 | 0.999999931 | -1.885205013 | 0.25970154  |
| RP11-578B16.1 | 6.85E-08 | 0.999999931 | 0.624861384  | 1.543134023 |
| RP11-578O24.2 | 6.81E-08 | 0.999999932 | -2.177509114 | 0.214054383 |
| RP11-57A1.1   | 6.76E-08 | 0.999999932 | 1.202008679  | 2.301114903 |
| RP11-57H12.5  | 6.69E-08 | 0.999999933 | -0.819927933 | 0.566125339 |
| RP11-57H14.4  | 6.61E-08 | 0.999999934 | -2.029192326 | 0.244840178 |
| RP11-582I16.4 | 6.46E-08 | 0.999999935 | -1.345671908 | 0.390149622 |
| RP11-583F2.1  | 6.31E-08 | 0.999999937 | 0.57266997   | 1.487924284 |
| RP11-583F2.2  | 6.17E-08 | 0.999999938 | -2.49797439  | 0.175437904 |
| RP11-588K22.2 | 6.17E-08 | 0.999999938 | 1.938669045  | 3.852984251 |
| RP11-589M4.4  | 6.16E-08 | 0.999999938 | 1.343327657  | 2.542297267 |
| RP11-600F24.7 | 6.10E-08 | 0.999999939 | 1.470283561  | 2.811780004 |
| RP11-60L3.1   | 6.10E-08 | 0.999999939 | -2.240007055 | 0.210658939 |
| RP11-612B6.2  | 6.07E-08 | 0.999999939 | 1.355470838  | 2.55888468  |
| RP11-612I15.1 | 6.05E-08 | 0.999999939 | 1.465855659  | 2.765061982 |
| RP11-613M10.6 | 5.96E-08 | 0.99999994  | -1.897089459 | 0.265984798 |
| RP11-619A14.3 | 5.85E-08 | 0.999999942 | -3.003643895 | 0.12411101  |
| RP11-61F12.1  | 5.83E-08 | 0.999999942 | -1.243277363 | 0.421800385 |
| RP11-621L6.2  | 5.78E-08 | 0.999999942 | -2.313752499 | 0.192446889 |
| RP11-622C24.2 | 5.69E-08 | 0.999999943 | -0.967307661 | 0.509238208 |
| RP11-629O1.2  | 5.54E-08 | 0.999999945 | 0.784435078  | 1.723970786 |
| RP11-62I21.1  | 5.52E-08 | 0.999999945 | 0.641757716  | 1.561399081 |

|                |          |             |              |             |
|----------------|----------|-------------|--------------|-------------|
| RP11-630A13.4  | 5.17E-08 | 0.999999948 | -1.478325021 | 0.358351565 |
| RP11-631N16.2  | 5.13E-08 | 0.999999949 | 3.049788163  | 8.754422413 |
| RP11-632F7.3   | 5.08E-08 | 0.999999949 | -1.98323168  | 0.247214376 |
| RP11-63G10.2   | 5.07E-08 | 0.999999949 | 0.940130189  | 1.9198005   |
| RP11-63G10.3   | 5.07E-08 | 0.999999949 | -2.899752438 | 0.114452413 |
| RP11-640M9.2   | 5.01E-08 | 0.99999995  | -5.426308159 | 0.015554295 |
| RP11-650J17.2  | 4.98E-08 | 0.99999995  | -1.021699701 | 0.492221714 |
| RP11-650L12.2  | 4.97E-08 | 0.99999995  | 0.732367828  | 1.661898264 |
| RP11-65E22.2   | 4.91E-08 | 0.999999951 | 0.828766687  | 1.777271612 |
| RP11-65L3.2    | 4.80E-08 | 0.999999952 | -1.019511973 | 0.493247927 |
| RP11-65L3.3    | 4.76E-08 | 0.999999952 | 1.623286821  | 3.08949385  |
| RP11-660L16.2  | 4.70E-08 | 0.999999953 | -1.129070007 | 0.457045055 |
| RP11-661A12.8  | 4.69E-08 | 0.999999953 | -2.113292848 | 0.224060944 |
| RP11-665G4.1   | 4.67E-08 | 0.999999953 | 1.437776747  | 2.709393894 |
| RP11-666F17.1  | 4.66E-08 | 0.999999953 | 1.375213247  | 2.60099819  |
| RP11-666F17.2  | 4.65E-08 | 0.999999953 | 0.584317916  | 1.499780439 |
| RP11-676J12.7  | 4.64E-08 | 0.999999954 | -1.836792677 | 0.276086047 |
| RP11-676J12.9  | 4.61E-08 | 0.999999954 | -1.356106746 | 0.388558024 |
| RP11-677M14.7  | 4.61E-08 | 0.999999954 | -2.775230453 | 0.143759859 |
| RP11-679B19.1  | 4.54E-08 | 0.999999955 | 0.911540764  | 1.882618992 |
| RP11-67F1.2    | 4.54E-08 | 0.999999955 | -1.573235413 | 0.332159563 |
| RP11-67L2.2    | 4.48E-08 | 0.999999955 | 1.028767821  | 2.045269799 |
| RP11-685M7.3   | 4.44E-08 | 0.999999956 | 2.028101521  | 4.080150831 |
| RP11-686D22.8  | 4.42E-08 | 0.999999956 | -2.43170897  | 0.18052893  |
| RP11-687M24.8  | 4.39E-08 | 0.999999956 | -3.369922986 | 0.096286876 |
| RP11-689K5.3   | 4.36E-08 | 0.999999956 | 0.979660295  | 1.972448256 |
| RP11-68L18.1   | 4.35E-08 | 0.999999957 | -1.323056373 | 0.398464202 |
| RP11-690D19.3  | 4.33E-08 | 0.999999957 | -1.498338337 | 0.352314835 |
| RP11-691H4.3   | 4.31E-08 | 0.999999957 | 2.393298614  | 5.544145551 |
| RP11-691H4.4   | 4.28E-08 | 0.999999957 | 0.794234823  | 1.734228039 |
| RP11-692D12.1  | 4.21E-08 | 0.999999958 | -3.717975479 | 0.075068389 |
| RP11-693M3.1   | 4.18E-08 | 0.999999958 | -1.659095357 | 0.315873333 |
| RP11-693N9.2   | 4.11E-08 | 0.999999959 | 1.237208605  | 2.357890864 |
| RP11-696N14.1  | 4.07E-08 | 0.999999959 | 1.920836295  | 3.795184239 |
| RP11-6N17.4    | 4.07E-08 | 0.999999959 | -2.05234816  | 0.24104431  |
| RP11-6O2.3     | 4.00E-08 | 0.99999996  | -2.165361384 | 0.213991784 |
| RP11-701H16.4  | 3.99E-08 | 0.99999996  | -2.598429457 | 0.150618005 |
| RP11-701H24.4  | 3.98E-08 | 0.99999996  | 1.738528422  | 3.338154943 |
| RP11-705C15.3  | 3.97E-08 | 0.99999996  | 1.8266261    | 3.56264799  |
| RP11-707M3.3   | 3.95E-08 | 0.99999996  | 1.7081189    | 3.2740289   |
| RP11-709A23.1  | 3.87E-08 | 0.999999961 | -1.054556539 | 0.48079398  |
| RP11-712B9.2   | 3.76E-08 | 0.999999962 | -0.849245123 | 0.554825895 |
| RP11-712B9.6   | 3.69E-08 | 0.999999963 | -3.732310548 | 0.051229158 |
| RP11-712P20.2  | 3.65E-08 | 0.999999963 | -2.428671725 | 0.185697131 |
| RP11-715J22.6  | 3.65E-08 | 0.999999964 | 0.855771107  | 1.810581946 |
| RP11-71H17.8   | 3.62E-08 | 0.999999964 | 1.144732373  | 2.220767545 |
| RP11-726G1.1   | 3.59E-08 | 0.999999964 | -0.721145044 | 0.606604284 |
| RP11-72K17.2   | 3.59E-08 | 0.999999964 | 1.94066775   | 3.841289953 |
| RP11-730A19.5  | 3.54E-08 | 0.999999965 | -2.711707434 | 0.152411361 |
| RP11-734K2.4   | 3.49E-08 | 0.999999965 | -2.827931379 | 0.138113416 |
| RP11-736K20.4  | 3.39E-08 | 0.999999966 | 1.131845377  | 2.202870672 |
| RP11-736K20.5  | 3.32E-08 | 0.999999967 | 0.552818822  | 1.467604722 |
| RP11-739L10.1  | 3.30E-08 | 0.999999967 | -2.209738024 | 0.216007352 |
| RP11-73M14.1   | 3.27E-08 | 0.999999967 | 1.206818038  | 2.315590925 |
| RP11-73M18.6   | 3.26E-08 | 0.999999967 | 2.0717507    | 4.285280093 |
| RP11-73M18.8   | 3.14E-08 | 0.999999969 | -3.055339389 | 0.104704725 |
| RP11-73M7.6    | 3.11E-08 | 0.999999969 | -1.70455435  | 0.299741554 |
| RP11-744O11.2  | 3.11E-08 | 0.999999969 | -0.853024022 | 0.552927413 |
| RP11-745A24.1  | 3.10E-08 | 0.999999969 | -2.480294569 | 0.17893846  |
| RP11-746P2.3   | 3.00E-08 | 0.99999997  | 0.776534135  | 1.713440344 |
| RP11-756H20.1  | 2.99E-08 | 0.99999997  | 1.086476395  | 2.124025145 |
| RP11-756I15.2  | 2.98E-08 | 0.99999997  | 0.750657593  | 1.683122102 |
| RP11-757F18.5  | 2.95E-08 | 0.999999971 | -0.648067862 | 0.637745265 |
| RP11-757G1.6   | 2.95E-08 | 0.999999971 | -3.26024547  | 0.097897108 |
| RP11-759A24.1  | 2.94E-08 | 0.999999971 | 1.114639898  | 2.167732898 |
| RP11-774O3.3   | 2.93E-08 | 0.999999971 | -2.118700809 | 0.224338069 |
| RP11-778J15.1  | 2.89E-08 | 0.999999971 | -2.501434465 | 0.168823032 |
| RP11-782C8.2   | 2.89E-08 | 0.999999971 | 1.025112003  | 2.036566717 |
| RP11-782C8.5   | 2.82E-08 | 0.999999972 | 0.817650104  | 1.763276004 |
| RP11-792A8.3   | 2.80E-08 | 0.999999972 | -4.160294057 | 0.054429391 |
| RP11-793H13.12 | 2.80E-08 | 0.999999972 | -1.043968235 | 0.484942897 |
| RP11-797H7.1   | 2.79E-08 | 0.999999972 | 0.655994419  | 1.575957777 |
| RP11-79M19.2   | 2.78E-08 | 0.999999972 | 0.776936136  | 1.716272301 |
| RP11-79N23.1   | 2.74E-08 | 0.999999973 | 0.93663227   | 1.918217411 |
| RP11-7K24.3    | 2.71E-08 | 0.999999973 | -3.035829383 | 0.121775581 |
| RP11-801G16.2  | 2.65E-08 | 0.999999974 | -1.416533546 | 0.37071204  |
| RP11-8015.1    | 2.62E-08 | 0.999999974 | -2.102856469 | 0.232543727 |
| RP11-8015.4    | 2.62E-08 | 0.999999974 | 1.059419244  | 2.09286164  |
| RP11-810K23.10 | 2.62E-08 | 0.999999974 | 0.706994987  | 1.633309198 |
| RP11-815J21.4  | 2.60E-08 | 0.999999974 | 1.764543435  | 3.399208737 |
| RP11-817I15.2  | 2.60E-08 | 0.999999974 | 0.780340991  | 1.718502619 |
| RP11-817I15.3  | 2.59E-08 | 0.999999974 | -2.068715465 | 0.231911133 |
| RP11-819C21.1  | 2.56E-08 | 0.999999974 | -2.844568405 | 0.139072026 |
| RP11-81A1.4    | 2.53E-08 | 0.999999975 | 2.047626526  | 4.252535439 |
| RP11-81A1.6    | 2.52E-08 | 0.999999975 | -0.539346267 | 0.688019625 |
| RP11-826F13.1  | 2.50E-08 | 0.999999975 | 1.446788843  | 2.732324425 |
| RP11-832A4.7   | 2.49E-08 | 0.999999975 | -1.161707286 | 0.446566378 |
| RP11-83A24.2   | 2.45E-08 | 0.999999975 | 1.201964416  | 2.301928891 |
| RP11-849H4.4   | 2.44E-08 | 0.999999976 | 0.63392856   | 1.552179334 |
| RP11-85B7.2    | 2.41E-08 | 0.999999976 | -4.294908449 | 0.039068292 |
| RP11-85I17.2   | 2.36E-08 | 0.999999976 | -1.744903049 | 0.295794491 |
| RP11-85K15.3   | 2.35E-08 | 0.999999976 | -0.943537279 | 0.518043834 |
| RP11-864N7.2   | 2.30E-08 | 0.999999977 | 1.378391733  | 2.618011337 |

|               |          |             |              |             |
|---------------|----------|-------------|--------------|-------------|
| RP11-887P2.5  | 2.30E-08 | 0.999999977 | -2.027528545 | 0.243306367 |
| RP11-89N17.1  | 2.30E-08 | 0.999999977 | -3.44463643  | 0.079726892 |
| RP11-89N17.2  | 2.24E-08 | 0.999999978 | -2.703181471 | 0.152189618 |
| RP11-89N17.4  | 2.20E-08 | 0.999999978 | -1.640142481 | 0.317057427 |
| RP11-90L20.2  | 2.19E-08 | 0.999999978 | -3.963845867 | 0.060120163 |
| RP11-90O23.1  | 2.19E-08 | 0.999999978 | -1.712667126 | 0.304547465 |
| RP11-932O9.10 | 2.19E-08 | 0.999999978 | -2.252744172 | 0.201273321 |
| RP11-933H2.4  | 2.16E-08 | 0.999999978 | -1.056736869 | 0.47966418  |
| RP11-967K21.1 | 2.14E-08 | 0.999999979 | 1.16992856   | 2.25429284  |
| RP11-968O1.5  | 2.12E-08 | 0.999999979 | 1.619298704  | 3.121642798 |
| RP11-96C23.13 | 2.11E-08 | 0.999999979 | 1.817405093  | 3.525123693 |
| RP11-96K19.4  | 2.10E-08 | 0.999999979 | 1.165210166  | 2.24587377  |
| RP11-972P1.7  | 2.10E-08 | 0.999999979 | 2.233573073  | 4.842725248 |
| RP11-981G7.6  | 2.02E-08 | 0.99999998  | -1.134926829 | 0.454317624 |
| RP11-981P6.1  | 2.01E-08 | 0.99999998  | -2.19758425  | 0.217832825 |
| RP11-983P16.2 | 2.00E-08 | 0.99999998  | -3.094583349 | 0.096609779 |
| RP11-983P16.4 | 1.98E-08 | 0.99999998  | -1.709403033 | 0.305510575 |
| RP11-98G7.1   | 1.98E-08 | 0.99999998  | -2.829313024 | 0.138696222 |
| RP11-9H20.2   | 1.98E-08 | 0.99999998  | 0.807593709  | 1.750415992 |
| RP11-9N12.2   | 1.91E-08 | 0.999999981 | 1.063232881  | 2.093438098 |
| RP11-9N12.3   | 1.90E-08 | 0.999999981 | -1.882685376 | 0.269666441 |
| RP1-221C16.8  | 1.87E-08 | 0.999999981 | -2.523551719 | 0.17214417  |
| RP1-239B22.5  | 1.85E-08 | 0.999999981 | -1.77710418  | 0.289781251 |
| RP1-244F24.1  | 1.85E-08 | 0.999999982 | 1.219550121  | 2.329976289 |
| RP1-257C22.2  | 1.81E-08 | 0.999999982 | 0.96684013   | 1.956450165 |
| RP1-290F12.3  | 1.80E-08 | 0.999999982 | -4.910867247 | 0.033159016 |
| RP13-104F24.2 | 1.80E-08 | 0.999999982 | -2.8083411   | 0.122179549 |
| RP13-104F24.3 | 1.79E-08 | 0.999999982 | 1.913584069  | 3.80048876  |
| RP13-188A5.1  | 1.78E-08 | 0.999999982 | 0.654100886  | 1.57400038  |
| RP13-204A15.5 | 1.77E-08 | 0.999999982 | -3.002729458 | 0.124258371 |
| RP13-225O21.2 | 1.76E-08 | 0.999999982 | 1.746640097  | 3.359992402 |
| RP13-297E16.4 | 1.76E-08 | 0.999999982 | 1.160970155  | 2.236807198 |
| RP13-39P12.3  | 1.72E-08 | 0.999999983 | -2.700180106 | 0.152660263 |
| RP13-452N2.1  | 1.71E-08 | 0.999999983 | 1.033284069  | 2.049609403 |
| RP13-476E20.1 | 1.71E-08 | 0.999999983 | 1.84507334   | 3.654642896 |
| RP13-487K5.1  | 1.66E-08 | 0.999999983 | 1.232128601  | 2.351633099 |
| RP13-514E23.1 | 1.65E-08 | 0.999999983 | 0.804083071  | 1.746406475 |
| RP1-53O8.2    | 1.62E-08 | 0.999999984 | 1.846834312  | 3.613802999 |
| RP1-56K13.2   | 1.62E-08 | 0.999999984 | 0.844821354  | 1.796326257 |
| RP1-60N8.1    | 1.59E-08 | 0.999999984 | -1.617673022 | 0.32054101  |
| RP1-67A8.3    | 1.56E-08 | 0.999999984 | 1.341055992  | 2.539682845 |
| RP1-80N2.4    | 1.55E-08 | 0.999999985 | -1.772197354 | 0.284317397 |
| RP1-99E18.2   | 1.55E-08 | 0.999999985 | -2.7335349   | 0.149284298 |
| RP3-325F22.3  | 1.54E-08 | 0.999999985 | -1.911987288 | 0.265001909 |
| RP3-329A5.8   | 1.53E-08 | 0.999999985 | -1.926936697 | 0.262572401 |
| RP3-331H24.6  | 1.49E-08 | 0.999999985 | -2.718932735 | 0.143684426 |
| RP3-331H24.7  | 1.49E-08 | 0.999999985 | 1.351414186  | 2.553199174 |
| RP3-363L9.1   | 1.48E-08 | 0.999999985 | 1.201272011  | 2.301212782 |
| RP3-368A4.5   | 1.48E-08 | 0.999999985 | -2.133976473 | 0.215115706 |
| RP3-394A18.1  | 1.46E-08 | 0.999999985 | -2.378953061 | 0.184506857 |
| RP3-403A15.5  | 1.45E-08 | 0.999999986 | 1.265629073  | 2.41595243  |
| RP3-405I10.3  | 1.43E-08 | 0.999999986 | 1.320251255  | 2.500857173 |
| RP3-425C14.4  | 1.39E-08 | 0.999999986 | 1.687338837  | 3.227529087 |
| RP3-428L16.2  | 1.39E-08 | 0.999999986 | -2.536160448 | 0.171274697 |
| RP3-439F8.1   | 1.38E-08 | 0.999999986 | -3.027413107 | 0.120579345 |
| RP3-449M8.9   | 1.37E-08 | 0.999999986 | 0.763663504  | 1.698855609 |
| RP3-449O17.1  | 1.37E-08 | 0.999999986 | -2.842877834 | 0.135685809 |
| RP3-471C18.1  | 1.37E-08 | 0.999999986 | -1.757133672 | 0.29551532  |
| RP3-471C18.2  | 1.36E-08 | 0.999999986 | -1.553624401 | 0.337754663 |
| RP3-510L9.1   | 1.35E-08 | 0.999999987 | 1.142692618  | 2.208313091 |
| RP4-584D14.5  | 1.33E-08 | 0.999999987 | 1.304471311  | 2.47778956  |
| RP4-591N18.2  | 1.31E-08 | 0.999999987 | 1.15665148   | 2.231882543 |
| RP4-597J3.1   | 1.29E-08 | 0.999999987 | -4.125916453 | 0.043948106 |
| RP4-614O4.13  | 1.27E-08 | 0.999999987 | -1.604480184 | 0.323540176 |
| RP4-625H18.2  | 1.23E-08 | 0.999999988 | -2.407570202 | 0.187660922 |
| RP4-635A23.6  | 1.21E-08 | 0.999999988 | 0.907927507  | 1.876890245 |
| RP4-641G12.3  | 1.20E-08 | 0.999999988 | 0.961053063  | 1.951643835 |
| RP4-647C14.2  | 1.18E-08 | 0.999999988 | -0.643812354 | 0.639827571 |
| RP4-669H2.1   | 1.17E-08 | 0.999999988 | 0.879243064  | 1.842051182 |
| RP4-673D20.3  | 1.15E-08 | 0.999999988 | 0.62351025   | 1.541226226 |
| RP4-673D20.6  | 1.15E-08 | 0.999999989 | 1.042138716  | 2.059347888 |
| RP4-706A16.3  | 1.14E-08 | 0.999999989 | 1.180336134  | 2.269628485 |
| RP4-714D9.5   | 1.13E-08 | 0.999999989 | 0.79499918   | 1.735685027 |
| RP4-717I23.3  | 1.11E-08 | 0.999999989 | -1.976208943 | 0.253753952 |
| RP4-734G22.3  | 1.11E-08 | 0.999999989 | -1.109510388 | 0.463150023 |
| RP4-737E23.2  | 1.09E-08 | 0.999999989 | -2.641039127 | 0.157342524 |
| RP4-742J24.2  | 1.09E-08 | 0.999999989 | 0.923054084  | 1.899294508 |
| RP4-758I18.13 | 1.08E-08 | 0.999999989 | -0.845829361 | 0.555944776 |
| RP4-777O23.2  | 1.08E-08 | 0.999999989 | -1.992342161 | 0.247452432 |
| RP4-784A16.3  | 1.07E-08 | 0.999999989 | -3.068121322 | 0.101393236 |
| RP4-784A16.4  | 1.05E-08 | 0.99999999  | 2.754370615  | 7.008640293 |
| RP4-791M13.5  | 1.05E-08 | 0.99999999  | -1.377433367 | 0.382229364 |
| RP4-794H19.1  | 1.03E-08 | 0.99999999  | 0.692163823  | 1.616783806 |
| RP4-798A10.2  | 1.03E-08 | 0.99999999  | 0.954851218  | 1.939635138 |
| RP4-800G7.1   | 1.02E-08 | 0.99999999  | 1.005694622  | 2.015305407 |
| RP5-1009N12.1 | 1.00E-08 | 0.99999999  | -2.515915955 | 0.171252802 |
| RP5-1027G4.3  | 9.99E-09 | 0.99999999  | -1.552039914 | 0.336267374 |
| RP5-1033H22.2 | 9.97E-09 | 0.99999999  | 1.14463178   | 2.223508864 |
| RP5-1039K5.19 | 9.77E-09 | 0.99999999  | -4.98022574  | 0.019217475 |
| RP5-1071N3.1  | 9.77E-09 | 0.99999999  | 1.893802402  | 3.77023804  |
| RP5-1086K13.1 | 9.70E-09 | 0.99999999  | 1.411528087  | 2.660366323 |
| RP5-1092L12.2 | 9.66E-09 | 0.99999999  | 0.953133887  | 1.936565115 |
| RP5-1101C3.1  | 9.61E-09 | 0.99999999  | 1.188749987  | 2.282620886 |

|               |          |            |              |             |
|---------------|----------|------------|--------------|-------------|
| RPS-1107A17.4 | 9.56E-09 | 0.99999999 | -1.93375487  | 0.25750688  |
| RPS-1120P11.3 | 9.41E-09 | 0.99999991 | -1.136623241 | 0.454705716 |
| RPS-1139B12.2 | 9.30E-09 | 0.99999991 | 1.358638344  | 2.564505123 |
| RPS-1139B12.4 | 9.29E-09 | 0.99999991 | -2.976010434 | 0.113074292 |
| RPS-1142A6.9  | 9.12E-09 | 0.99999991 | -2.092444353 | 0.23427953  |
| RPS-1158E12.3 | 8.95E-09 | 0.99999991 | 0.616809738  | 1.533826973 |
| RPS-1159O4.2  | 8.89E-09 | 0.99999991 | -1.704839791 | 0.306053596 |
| RPS-1185I7.1  | 8.81E-09 | 0.99999991 | 1.467815549  | 2.767213881 |
| RPS-832C2.5   | 8.81E-09 | 0.99999991 | -2.870554184 | 0.12679614  |
| RPS-836J3.1   | 8.66E-09 | 0.99999991 | 1.300627256  | 2.464077125 |
| RPS-858L17.1  | 8.58E-09 | 0.99999991 | -0.848536326 | 0.554834046 |
| RPS-862P8.2   | 8.53E-09 | 0.99999991 | -2.29529658  | 0.203102752 |
| RPS-956O18.2  | 8.49E-09 | 0.99999992 | 1.483128939  | 2.825078123 |
| RPS-999L4.2   | 8.47E-09 | 0.99999992 | 1.164784526  | 2.242612613 |
| RP6-109B7.4   | 8.26E-09 | 0.99999992 | 1.978660947  | 4.0214187   |
| RP6-206I17.4  | 8.20E-09 | 0.99999992 | -1.258116569 | 0.417620375 |
| RP6-74O6.6    | 8.20E-09 | 0.99999992 | 1.565581003  | 3.001481887 |
| RPARP-AS1     | 8.14E-09 | 0.99999992 | -0.923907388 | 0.526826812 |
| RPF2          | 8.12E-09 | 0.99999992 | 1.475998077  | 2.783614921 |
| RPIA          | 7.99E-09 | 0.99999992 | 0.733453542  | 1.66445398  |
| RPL10         | 7.91E-09 | 0.99999992 | 1.272717225  | 2.42138562  |
| RPL10A        | 7.75E-09 | 0.99999992 | -2.029871228 | 0.239480823 |
| RPL10AP6      | 7.61E-09 | 0.99999992 | -4.763278366 | 0.0357549   |
| RPL11         | 7.59E-09 | 0.99999992 | 0.707927216  | 1.633659862 |
| RPL12         | 7.11E-09 | 0.99999993 | 2.506196487  | 5.892243004 |
| RPL12P4       | 6.99E-09 | 0.99999993 | 1.033747294  | 2.048745101 |
| RPL13         | 6.95E-09 | 0.99999993 | 0.701452663  | 1.626459003 |
| RPL13A        | 6.90E-09 | 0.99999993 | 0.870204195  | 1.828346139 |
| RPL13AP25     | 6.86E-09 | 0.99999993 | 1.960197149  | 3.941597733 |
| RPL13P12      | 6.86E-09 | 0.99999993 | -1.563413318 | 0.336879157 |
| RPL14         | 6.78E-09 | 0.99999993 | -1.114457625 | 0.459578967 |
| RPL14P1       | 6.70E-09 | 0.99999993 | 1.073003848  | 2.106082113 |
| RPL15         | 6.58E-09 | 0.99999993 | 1.012954535  | 2.019950271 |
| RPL17         | 6.43E-09 | 0.99999994 | -4.766027446 | 0.026896284 |
| RPL18         | 6.39E-09 | 0.99999994 | -3.017997097 | 0.108697212 |
| RPL18A        | 6.34E-09 | 0.99999994 | 1.109568148  | 2.159492763 |
| RPL19         | 6.33E-09 | 0.99999994 | 0.670268687  | 1.592332924 |
| RPL21         | 6.25E-09 | 0.99999994 | -3.638057049 | 0.069447156 |
| RPL21P32      | 6.25E-09 | 0.99999994 | 0.809029663  | 1.752449827 |
| RPL21P44      | 6.03E-09 | 0.99999994 | 1.088022002  | 2.137400389 |
| RPL22         | 6.01E-09 | 0.99999994 | 1.221269467  | 2.333061232 |
| RPL22L1       | 5.99E-09 | 0.99999994 | 0.791585103  | 1.732256869 |
| RPL23         | 5.97E-09 | 0.99999994 | -0.812556633 | 0.569269014 |
| RPL23A        | 5.95E-09 | 0.99999994 | -1.458508755 | 0.362843094 |
| RPL23AP32     | 5.88E-09 | 0.99999994 | 0.975218663  | 1.972889474 |
| RPL23AP7      | 5.81E-09 | 0.99999994 | -1.414340579 | 0.372822693 |
| RPL23AP82     | 5.67E-09 | 0.99999994 | 1.251506355  | 2.381859101 |
| RPL24         | 5.61E-09 | 0.99999994 | -2.647094568 | 0.159309181 |
| RPL26         | 5.59E-09 | 0.99999994 | -6.613588975 | 0.008811811 |
| RPL26L1       | 5.58E-09 | 0.99999994 | 1.722938175  | 3.302924446 |
| RPL27         | 5.56E-09 | 0.99999994 | 1.356989794  | 2.561783136 |
| RPL27A        | 5.53E-09 | 0.99999994 | -1.695017994 | 0.306675712 |
| RPL28         | 5.49E-09 | 0.99999995 | -2.130255902 | 0.225854301 |
| RPL29         | 5.46E-09 | 0.99999995 | 2.259483795  | 4.827268447 |
| RPL3          | 5.36E-09 | 0.99999995 | 1.661130495  | 3.177390568 |
| RPL30         | 5.31E-09 | 0.99999995 | -5.694773526 | 0.016454039 |
| RPL31         | 5.30E-09 | 0.99999995 | -1.838927148 | 0.27718838  |
| RPL32         | 5.30E-09 | 0.99999995 | -3.698233069 | 0.064116512 |
| RPL34         | 5.23E-09 | 0.99999995 | 1.229283697  | 2.344617254 |
| RPL35         | 5.22E-09 | 0.99999995 | 0.905497354  | 1.875347607 |
| RPL35A        | 5.19E-09 | 0.99999995 | 1.368114566  | 2.591674311 |
| RPL36         | 5.18E-09 | 0.99999995 | 1.339606475  | 2.532093577 |
| RPL36A        | 5.16E-09 | 0.99999995 | 0.539771857  | 1.45411186  |
| RPL36AL       | 5.12E-09 | 0.99999995 | -3.421965528 | 0.082076529 |
| RPL37         | 5.00E-09 | 0.99999995 | -1.275787473 | 0.4124102   |
| RPL37A        | 4.94E-09 | 0.99999995 | -1.616111802 | 0.326135064 |
| RPL37AP1      | 4.94E-09 | 0.99999995 | -1.648742583 | 0.31610773  |
| RPL38         | 4.90E-09 | 0.99999995 | -4.017459108 | 0.048524963 |
| RPL3P4        | 4.83E-09 | 0.99999995 | -1.897705968 | 0.265834124 |
| RPL4          | 4.82E-09 | 0.99999995 | -2.343314229 | 0.188969565 |
| RPL41         | 4.75E-09 | 0.99999995 | 1.037263709  | 2.053402289 |
| RPL41P1       | 4.74E-09 | 0.99999995 | 2.227923501  | 4.764861609 |
| RPL4P4        | 4.71E-09 | 0.99999995 | -1.632688571 | 0.319187061 |
| RPL4P5        | 4.65E-09 | 0.99999995 | -3.889324303 | 0.065542007 |
| RPL4P6        | 4.63E-09 | 0.99999995 | 1.106387216  | 2.161835522 |
| RPL5          | 4.62E-09 | 0.99999995 | -1.052472376 | 0.482049247 |
| RPL6          | 4.55E-09 | 0.99999995 | -1.710244375 | 0.30491889  |
| RPL6P8        | 4.33E-09 | 0.99999996 | 0.818189111  | 1.764845289 |
| RPL7          | 4.23E-09 | 0.99999996 | 1.377401911  | 2.59870262  |
| RPL7A         | 3.99E-09 | 0.99999996 | -2.487267943 | 0.169451708 |
| RPL7AP30      | 3.90E-09 | 0.99999996 | -3.847267748 | 0.067666612 |
| RPL7AP6       | 3.75E-09 | 0.99999996 | -2.37824959  | 0.190206175 |
| RPL7L1        | 3.74E-09 | 0.99999996 | 1.117607578  | 2.17149242  |
| RPL8          | 3.73E-09 | 0.99999996 | -1.871268465 | 0.27042177  |
| RPL9          | 3.72E-09 | 0.99999996 | 1.501517406  | 2.835169577 |
| RPLP0         | 3.71E-09 | 0.99999996 | -1.11293801  | 0.462200046 |
| RPLP1         | 3.69E-09 | 0.99999996 | -1.9809431   | 0.253024029 |
| RPLP2         | 3.68E-09 | 0.99999996 | -1.077317172 | 0.473423863 |
| RPN1          | 3.68E-09 | 0.99999996 | -6.086151801 | 0.008220829 |
| RPP25         | 3.55E-09 | 0.99999996 | 0.555088954  | 1.469564737 |
| RPP25L        | 3.54E-09 | 0.99999996 | -0.679528229 | 0.624302907 |
| RPP38         | 3.51E-09 | 0.99999996 | 1.598117755  | 3.062256471 |
| RPP40         | 3.44E-09 | 0.99999997 | 2.260939892  | 4.795349896 |

|          |          |             |              |             |
|----------|----------|-------------|--------------|-------------|
| RP510    | 3.41E-09 | 0.999999997 | 0.824902775  | 1.771699207 |
| RP510P2  | 3.21E-09 | 0.999999997 | -0.838059519 | 0.558629601 |
| RP511    | 3.11E-09 | 0.999999997 | -1.522084821 | 0.345510194 |
| RP512    | 3.04E-09 | 0.999999997 | 1.957473929  | 3.88839915  |
| RP513    | 2.98E-09 | 0.999999997 | -3.282353938 | 0.101871365 |
| RP514    | 2.95E-09 | 0.999999997 | -1.057701588 | 0.479688887 |
| RP514P8  | 2.94E-09 | 0.999999997 | -0.919316583 | 0.528394935 |
| RP515    | 2.92E-09 | 0.999999997 | -2.295262204 | 0.203530874 |
| RP515A   | 2.92E-09 | 0.999999997 | 1.199617462  | 2.298006369 |
| RP518    | 2.87E-09 | 0.999999997 | 0.66286997   | 1.583481868 |
| RP518P12 | 2.87E-09 | 0.999999997 | -2.834634649 | 0.129034386 |
| RP519    | 2.85E-09 | 0.999999997 | 1.129982401  | 2.190521129 |
| RP519BP1 | 2.83E-09 | 0.999999997 | -1.794797132 | 0.282175183 |
| RP52     | 2.79E-09 | 0.999999997 | -1.63548211  | 0.320855709 |
| RP520    | 2.77E-09 | 0.999999997 | 1.542790414  | 2.931658451 |
| RP520P22 | 2.74E-09 | 0.999999997 | 1.254136008  | 2.38578829  |
| RP521    | 2.63E-09 | 0.999999997 | -0.517360149 | 0.698264539 |
| RP523    | 2.58E-09 | 0.999999997 | -2.306283286 | 0.196511094 |
| RP524    | 2.58E-09 | 0.999999997 | -0.860964017 | 0.549881827 |
| RP525    | 2.52E-09 | 0.999999997 | -1.673192465 | 0.313097725 |
| RP526    | 2.51E-09 | 0.999999997 | 1.04855502   | 2.076602767 |
| RP527    | 2.43E-09 | 0.999999998 | -2.942125972 | 0.127494207 |
| RP527A   | 2.40E-09 | 0.999999998 | 0.572255487  | 1.48695515  |
| RP528    | 2.38E-09 | 0.999999998 | -0.896873    | 0.535956943 |
| RP528P7  | 2.36E-09 | 0.999999998 | 1.695407799  | 3.251754074 |
| RP529    | 2.34E-09 | 0.999999998 | -0.719773674 | 0.607036313 |
| RP52P46  | 2.34E-09 | 0.999999998 | 0.552963129  | 1.467615889 |
| RP52P5   | 2.30E-09 | 0.999999998 | 2.691843107  | 7.132483488 |
| RP52P7   | 2.29E-09 | 0.999999998 | 1.97806062   | 3.979572906 |
| RP53     | 2.22E-09 | 0.999999998 | 0.638237207  | 1.557152167 |
| RP53A    | 2.20E-09 | 0.999999998 | -3.860150411 | 0.061210082 |
| RP53AP29 | 2.19E-09 | 0.999999998 | 1.60521942   | 3.057462514 |
| RP54X    | 2.19E-09 | 0.999999998 | 3.423537125  | 11.31481899 |
| RP54XP5  | 2.19E-09 | 0.999999998 | -3.715124437 | 0.075366653 |
| RP54XP6  | 2.09E-09 | 0.999999998 | 2.938659762  | 8.504864531 |
| RP55     | 2.09E-09 | 0.999999998 | 0.563603013  | 1.478498195 |
| RP56     | 2.09E-09 | 0.999999998 | 0.903024511  | 1.870328807 |
| RP56KA1  | 2.05E-09 | 0.999999998 | -1.408100438 | 0.375112477 |
| RP56KL1  | 2.05E-09 | 0.999999998 | -2.278682936 | 0.194343771 |
| RP57     | 1.98E-09 | 0.999999998 | 0.589346008  | 1.504750679 |
| RP57P1   | 1.97E-09 | 0.999999998 | -0.936354032 | 0.522255175 |
| RP58     | 1.90E-09 | 0.999999998 | 0.828704382  | 1.77692323  |
| RP59     | 1.88E-09 | 0.999999998 | 1.259228948  | 2.416229941 |
| RP5A     | 1.87E-09 | 0.999999998 | 1.418013966  | 2.677151897 |
| RP5AP36  | 1.87E-09 | 0.999999998 | 1.112046686  | 2.162056748 |
| RP5AP6   | 1.83E-09 | 0.999999998 | 0.697185935  | 1.621569193 |
| RPUSD1   | 1.81E-09 | 0.999999998 | 0.763504702  | 1.69767214  |
| RPUSD2   | 1.78E-09 | 0.999999998 | 2.033302413  | 4.193035054 |
| RPUSD4   | 1.75E-09 | 0.999999998 | 1.556824173  | 2.946090418 |
| RRAGB    | 1.75E-09 | 0.999999998 | -2.742628278 | 0.148150999 |
| RRAGD    | 1.74E-09 | 0.999999998 | 1.66030306   | 3.163291003 |
| RRM2     | 1.72E-09 | 0.999999998 | 1.169644384  | 2.251541411 |
| RRN3     | 1.70E-09 | 0.999999998 | 0.809764214  | 1.755284602 |
| RRP1     | 1.69E-09 | 0.999999998 | -2.735745568 | 0.146831375 |
| RRP12    | 1.65E-09 | 0.999999998 | 1.123995148  | 2.179801891 |
| RRP15    | 1.64E-09 | 0.999999998 | 0.784213982  | 1.72232132  |
| RRP1B    | 1.58E-09 | 0.999999998 | -2.755039757 | 0.141397851 |
| RRP36    | 1.53E-09 | 0.999999998 | -4.951755007 | 0.025723371 |
| RRP7A    | 1.53E-09 | 0.999999998 | 0.710392922  | 1.638484741 |
| RRP8     | 1.51E-09 | 0.999999998 | -1.085224826 | 0.468968696 |
| RRP9     | 1.49E-09 | 0.999999999 | -0.657712988 | 0.633543866 |
| RRS1     | 1.49E-09 | 0.999999999 | -2.112216821 | 0.231189399 |
| RSAD1    | 1.49E-09 | 0.999999999 | -1.209240117 | 0.432049301 |
| RSAD2    | 1.43E-09 | 0.999999999 | 1.110255984  | 2.159376299 |
| RSL1D1   | 1.40E-09 | 0.999999999 | 2.108946826  | 4.324537929 |
| RSL24D1  | 1.39E-09 | 0.999999999 | -0.965599523 | 0.51181152  |
| RSPH1    | 1.39E-09 | 0.999999999 | -2.904179768 | 0.129381127 |
| RSPH3    | 1.37E-09 | 0.999999999 | 1.23330739   | 2.35288667  |
| RSRC1    | 1.35E-09 | 0.999999999 | 1.62738989   | 3.089799279 |
| RSRP1    | 1.34E-09 | 0.999999999 | 0.608746412  | 1.525226058 |
| RSU1P2   | 1.32E-09 | 0.999999999 | -1.598486558 | 0.325438488 |
| RTCB     | 1.31E-09 | 0.999999999 | -2.030342605 | 0.244271621 |
| RTN2     | 1.28E-09 | 0.999999999 | -2.734316723 | 0.143574866 |
| RTN4IP1  | 1.24E-09 | 0.999999999 | 1.26737797   | 2.40734141  |
| RUNX1    | 1.23E-09 | 0.999999999 | 1.359244506  | 2.569360064 |
| RUNX2    | 1.22E-09 | 0.999999999 | 1.822202106  | 3.541661002 |
| RUVBL1   | 1.20E-09 | 0.999999999 | 0.857482714  | 1.812302627 |
| RUVBL2   | 1.18E-09 | 0.999999999 | -2.959394061 | 0.115602671 |
| RWDD4    | 1.17E-09 | 0.999999999 | 1.338482052  | 2.530815669 |
| RWDD4P2  | 1.16E-09 | 0.999999999 | 0.950618702  | 1.933293713 |
| RYR1     | 1.15E-09 | 0.999999999 | 0.938102263  | 1.91690899  |
| RYR2     | 1.12E-09 | 0.999999999 | 1.778636519  | 3.431246348 |
| S100A10  | 1.10E-09 | 0.999999999 | -3.611998733 | 0.076706848 |
| S100A14  | 1.10E-09 | 0.999999999 | 0.764582143  | 1.699422298 |
| S100B    | 1.09E-09 | 0.999999999 | 1.281161124  | 2.431143012 |
| S1PR2    | 1.09E-09 | 0.999999999 | 1.038093002  | 2.060439712 |
| S1PR3    | 1.03E-09 | 0.999999999 | -1.376488413 | 0.384928898 |
| SACS     | 1.03E-09 | 0.999999999 | -0.613448632 | 0.653480508 |
| SAE1     | 1.03E-09 | 0.999999999 | -1.855292157 | 0.273824764 |
| SALL2    | 1.01E-09 | 0.999999999 | -2.019776955 | 0.246546071 |
| SALL4    | 1.01E-09 | 0.999999999 | -1.333051222 | 0.394063458 |
| SAMD4A   | 9.88E-10 | 0.999999999 | -1.236118036 | 0.422166865 |
| SAMD9    | 9.80E-10 | 0.999999999 | -4.055689931 | 0.052723467 |

|             |          |             |              |             |
|-------------|----------|-------------|--------------|-------------|
| SAMD9L      | 9.70E-10 | 0.999999999 | -2.728875039 | 0.148701562 |
| SAMM50      | 9.62E-10 | 0.999999999 | -0.970682619 | 0.508421366 |
| SAP30L      | 9.55E-10 | 0.999999999 | 1.588419603  | 3.013219923 |
| SAP30L-AS1  | 9.50E-10 | 0.999999999 | 1.487379113  | 2.806482635 |
| SAPCD2      | 9.42E-10 | 0.999999999 | -2.647116504 | 0.15879262  |
| SARS        | 9.41E-10 | 0.999999999 | -0.922523441 | 0.527514724 |
| SARS2       | 9.39E-10 | 0.999999999 | -3.052023443 | 0.119469739 |
| SASH1       | 9.17E-10 | 0.999999999 | -3.472640162 | 0.086092927 |
| SAT1        | 8.79E-10 | 0.999999999 | -3.018316591 | 0.12265879  |
| SAT2        | 8.76E-10 | 0.999999999 | -0.698191419 | 0.615949392 |
| SATB1       | 8.50E-10 | 0.999999999 | -2.042892972 | 0.241919612 |
| SBK1        | 8.41E-10 | 0.999999999 | 1.380881404  | 2.604576925 |
| SCAND3P1    | 8.18E-10 | 0.999999999 | -5.223172707 | 0.022335056 |
| SCARB1      | 7.85E-10 | 0.999999999 | 1.622854162  | 3.088059504 |
| SCARNA10    | 7.79E-10 | 0.999999999 | -4.245501752 | 0.048003621 |
| SCEL        | 7.79E-10 | 0.999999999 | -1.402609997 | 0.375848145 |
| SCEL-AS1    | 7.61E-10 | 0.999999999 | 3.662922022  | 14.65871203 |
| SCFD2       | 7.58E-10 | 0.999999999 | 0.932043948  | 1.908652793 |
| SCG2        | 7.52E-10 | 0.999999999 | -3.17929847  | 0.106531214 |
| SCGB1D2     | 7.46E-10 | 0.999999999 | -1.170070161 | 0.441588247 |
| SCGB3A2     | 7.45E-10 | 0.999999999 | 0.519173781  | 1.433203529 |
| SCLY        | 7.18E-10 | 0.999999999 | 2.148594543  | 4.511008825 |
| SCML1       | 7.05E-10 | 0.999999999 | -1.02894115  | 0.488202131 |
| SCN1A       | 6.94E-10 | 0.999999999 | -5.689771996 | 0.018871748 |
| SCN2B       | 6.90E-10 | 0.999999999 | -1.197890342 | 0.43578638  |
| SCN3A       | 6.83E-10 | 0.999999999 | -1.344580459 | 0.393734097 |
| SCN8A       | 6.70E-10 | 0.999999999 | -4.057797479 | 0.056878664 |
| SC01        | 6.69E-10 | 0.999999999 | -1.844048693 | 0.277968923 |
| SCRG1       | 6.64E-10 | 0.999999999 | -3.678252075 | 0.077031853 |
| SCUBE2      | 6.62E-10 | 0.999999999 | 0.571373464  | 1.487051662 |
| SDAD1       | 6.56E-10 | 0.999999999 | -4.652751266 | 0.030024588 |
| SDAD1P1     | 6.51E-10 | 0.999999999 | -1.582931326 | 0.333554281 |
| SDC2        | 6.28E-10 | 0.999999999 | 0.873980014  | 1.832722918 |
| SDCCAG3     | 6.14E-10 | 0.999999999 | -1.833385052 | 0.274781716 |
| SDHA        | 6.03E-10 | 0.999999999 | -1.569673016 | 0.335647474 |
| SDHAF1      | 6.00E-10 | 0.999999999 | -2.674828902 | 0.155121922 |
| SDHAF3      | 5.99E-10 | 0.999999999 | 1.942691356  | 3.879471625 |
| SDHAF4      | 5.95E-10 | 0.999999999 | 1.188585207  | 2.280081274 |
| SDHB        | 5.94E-10 | 0.999999999 | -1.834065866 | 0.277503166 |
| SDK1        | 5.66E-10 | 0.999999999 | -2.586018389 | 0.154520217 |
| SDR16CS     | 5.52E-10 | 0.999999999 | -1.932376154 | 0.261775636 |
| SDR42E1     | 5.52E-10 | 0.999999999 | 1.383169774  | 2.628353123 |
| SEC14L4     | 5.37E-10 | 0.999999999 | -1.148413647 | 0.448452007 |
| SEC14L6     | 5.25E-10 | 0.999999999 | 0.871759609  | 1.830241571 |
| SEC23B      | 5.16E-10 | 0.999999999 | 1.447654648  | 2.734281819 |
| SEC24B-AS1  | 5.09E-10 | 0.999999999 | 0.877571056  | 1.838801915 |
| SEC31B      | 4.88E-10 | 1           | -3.461562579 | 0.090240304 |
| SEC61A1     | 4.87E-10 | 1           | -3.762201602 | 0.061097059 |
| SEC61B      | 4.86E-10 | 1           | -1.091034631 | 0.468789292 |
| SECISBP2L   | 4.83E-10 | 1           | 1.113380212  | 2.163907981 |
| SEH1L       | 4.80E-10 | 1           | 1.49856375   | 2.82638394  |
| SEMA3C      | 4.68E-10 | 1           | 0.838893038  | 1.791435666 |
| SEMA3G      | 4.67E-10 | 1           | 1.693392943  | 3.234219124 |
| SEMA4F      | 4.60E-10 | 1           | -1.594884317 | 0.330754907 |
| SEMA5A      | 4.59E-10 | 1           | 2.605141591  | 6.217406594 |
| SEMA6A      | 4.59E-10 | 1           | -0.684431297 | 0.622077616 |
| SEMA6A-AS1  | 4.57E-10 | 1           | -0.88258886  | 0.54213786  |
| SEMA6D      | 4.54E-10 | 1           | 1.668120366  | 3.200309173 |
| SENP3       | 4.48E-10 | 1           | -2.933606101 | 0.128633463 |
| SENP7       | 4.37E-10 | 1           | -1.918475638 | 0.261531104 |
| SEPH51      | 4.23E-10 | 1           | 0.764374087  | 1.699030085 |
| SEPSECS-AS1 | 4.22E-10 | 1           | 1.222541888  | 2.336582979 |
| 1-Sep       | 4.20E-10 | 1           | 1.439016201  | 2.71845064  |
| 10-Sep      | 4.17E-10 | 1           | 1.575675101  | 2.98636844  |
| 3-Sep       | 4.12E-10 | 1           | 1.686816181  | 3.224989556 |
| 4-Sep       | 4.12E-10 | 1           | 1.405615036  | 2.660177103 |
| SEPT7-AS1   | 3.92E-10 | 1           | -4.832377652 | 0.030482906 |
| 8-Sep       | 3.84E-10 | 1           | 1.234064138  | 2.354527089 |
| SERAC1      | 3.80E-10 | 1           | -0.747685546 | 0.59532838  |
| SERBP1      | 3.75E-10 | 1           | 0.637789017  | 1.556888964 |
| SERBP1P6    | 3.67E-10 | 1           | -3.83542536  | 0.069393672 |
| SERGEF      | 3.60E-10 | 1           | -5.823052301 | 0.014354915 |
| SERPINA10   | 3.60E-10 | 1           | 0.689530071  | 1.612813324 |
| SERPINA11   | 3.56E-10 | 1           | -2.39290776  | 0.188780428 |
| SERPINA9    | 3.56E-10 | 1           | 0.970582128  | 1.959920118 |
| SERPINB2    | 3.52E-10 | 1           | -2.062036176 | 0.234830379 |
| SERPINB6    | 3.50E-10 | 1           | 1.174601263  | 2.261350343 |
| SERTAD4     | 3.46E-10 | 1           | -2.598810216 | 0.153011085 |
| SERTAD4-AS1 | 3.45E-10 | 1           | 1.727280656  | 3.325375778 |
| SES2        | 3.42E-10 | 1           | 1.948167363  | 3.885908602 |
| SETBP1      | 3.37E-10 | 1           | 1.096108693  | 2.141008109 |
| SETD6       | 3.29E-10 | 1           | 0.98813557   | 1.983805013 |
| SETD7       | 3.17E-10 | 1           | 0.91089026   | 1.880447133 |
| SF3A3       | 3.16E-10 | 1           | 0.723214749  | 1.65123571  |
| SF3B2       | 3.16E-10 | 1           | 1.290941371  | 2.449503984 |
| SF3B3       | 3.12E-10 | 1           | -1.313798411 | 0.401224135 |
| SF3B5       | 3.07E-10 | 1           | 1.949391679  | 3.927213161 |
| SF3B6       | 3.07E-10 | 1           | -0.952509127 | 0.515965829 |
| SFR1P1      | 2.99E-10 | 1           | 0.566084514  | 1.480663245 |
| SFRP1       | 2.95E-10 | 1           | -6.662664892 | 0.007169839 |
| SFTA1P      | 2.92E-10 | 1           | -1.521995356 | 0.347553794 |
| SFXN1       | 2.85E-10 | 1           | 1.509805967  | 2.86172962  |
| SFXN2       | 2.79E-10 | 1           | -5.170095989 | 0.027322718 |

|              |          |   |              |             |
|--------------|----------|---|--------------|-------------|
| SFXN4        | 2.72E-10 | 1 | -1.68373292  | 0.307940072 |
| SGCB         | 2.65E-10 | 1 | 1.037843941  | 2.054393039 |
| SGK1         | 2.63E-10 | 1 | -2.391509812 | 0.184149191 |
| SGK2         | 2.63E-10 | 1 | 1.461863759  | 2.757770999 |
| SGMS1        | 2.60E-10 | 1 | -1.457891584 | 0.363079088 |
| SGPL1        | 2.52E-10 | 1 | 0.857032521  | 1.81274826  |
| SGTA         | 2.48E-10 | 1 | -3.890532302 | 0.06589696  |
| SH2D2A       | 2.44E-10 | 1 | 2.99007021   | 8.028168542 |
| SH2D4A       | 2.44E-10 | 1 | -1.55142574  | 0.338373937 |
| SH3KBP1      | 2.42E-10 | 1 | 1.165955217  | 2.248949455 |
| SH3PXD2A-AS1 | 2.39E-10 | 1 | 1.621465775  | 3.077045217 |
| SH3RF1       | 2.38E-10 | 1 | -4.147275901 | 0.055678096 |
| SH3RF3       | 2.37E-10 | 1 | 1.256605978  | 2.389406273 |
| SHANK2       | 2.36E-10 | 1 | -2.181727547 | 0.217461126 |
| SHANK2-AS1   | 2.32E-10 | 1 | -2.434503339 | 0.175060468 |
| SHANK2-AS2   | 2.25E-10 | 1 | 0.841447565  | 1.795154471 |
| SHANK2-AS3   | 2.16E-10 | 1 | 1.911683392  | 3.865651479 |
| SHB          | 2.04E-10 | 1 | -2.789564443 | 0.139195056 |
| SHC3         | 2.04E-10 | 1 | -1.18174832  | 0.440090391 |
| SHC4         | 2.03E-10 | 1 | 1.632131239  | 3.104492649 |
| SHE          | 2.02E-10 | 1 | 0.62297435   | 1.540530626 |
| SHF          | 2.00E-10 | 1 | 1.220090692  | 2.332151071 |
| SHMT1        | 1.97E-10 | 1 | 1.13455883   | 2.197253021 |
| SHMT2        | 1.97E-10 | 1 | 0.843407884  | 1.795074627 |
| SHROOM2      | 1.96E-10 | 1 | -4.832101938 | 0.032258155 |
| SHROOM4      | 1.93E-10 | 1 | -3.030675944 | 0.11929265  |
| SIGMAR1      | 1.92E-10 | 1 | 1.321933576  | 2.508348291 |
| SIL1         | 1.88E-10 | 1 | 1.372105156  | 2.592489899 |
| SIRPA        | 1.86E-10 | 1 | 1.30759881   | 2.477208508 |
| SKA1         | 1.78E-10 | 1 | -1.803904966 | 0.282459748 |
| SKI          | 1.76E-10 | 1 | 0.877049405  | 1.837252887 |
| SKINTL       | 1.72E-10 | 1 | -3.25601146  | 0.09701244  |
| SLA          | 1.67E-10 | 1 | 0.633443901  | 1.551352891 |
| SLAMF8       | 1.67E-10 | 1 | 0.634246816  | 1.552608948 |
| SLBP         | 1.62E-10 | 1 | -0.583969081 | 0.666925297 |
| SLC10A1      | 1.61E-10 | 1 | 0.665509475  | 1.586465035 |
| SLC12A1      | 1.55E-10 | 1 | 1.619020864  | 3.07744602  |
| SLC12A8      | 1.52E-10 | 1 | -1.186339497 | 0.438791497 |
| SLC13A4      | 1.44E-10 | 1 | -1.947573529 | 0.255935643 |
| SLC14A2      | 1.41E-10 | 1 | -2.054844607 | 0.236360888 |
| SLC15A3      | 1.40E-10 | 1 | -3.302276421 | 0.100649093 |
| SLC16A1      | 1.33E-10 | 1 | -3.235038983 | 0.101513655 |
| SLC16A10     | 1.31E-10 | 1 | -4.951221003 | 0.027351886 |
| SLC16A14     | 1.26E-10 | 1 | -3.453616669 | 0.073254281 |
| SLC16A1-AS1  | 1.24E-10 | 1 | 1.090809404  | 2.130240012 |
| SLC16A3      | 1.23E-10 | 1 | 1.654874885  | 3.189440485 |
| SLC16A6      | 1.23E-10 | 1 | -1.054394056 | 0.479527403 |
| SLC16A9      | 1.18E-10 | 1 | 0.653544042  | 1.573294293 |
| SLC18B1      | 1.17E-10 | 1 | 0.98904304   | 1.986231875 |
| SLC1A2       | 1.13E-10 | 1 | -1.679977977 | 0.308831145 |
| SLC1A4       | 1.11E-10 | 1 | -3.908562268 | 0.058447701 |
| SLC1A5       | 1.10E-10 | 1 | 0.680131991  | 1.60297762  |
| SLC22A15     | 1.06E-10 | 1 | -1.241239132 | 0.422852952 |
| SLC22A17     | 1.04E-10 | 1 | 0.600915884  | 1.517587255 |
| SLC22A4      | 1.04E-10 | 1 | 0.765753934  | 1.70189388  |
| SLC24A3      | 1.02E-10 | 1 | -0.760768828 | 0.589964273 |
| SLC25A1      | 1.01E-10 | 1 | 0.814653409  | 1.759712523 |
| SLC25A13     | 9.88E-11 | 1 | 1.685426309  | 3.239522059 |
| SLC25A15     | 9.56E-11 | 1 | -0.710224647 | 0.611202344 |
| SLC25A15P5   | 9.28E-11 | 1 | 1.103797753  | 2.14972367  |
| SLC25A17     | 8.98E-11 | 1 | 0.691094208  | 1.614728578 |
| SLC25A19     | 8.79E-11 | 1 | -2.359277745 | 0.189773757 |
| SLC25A2      | 8.77E-11 | 1 | -1.468233348 | 0.358748875 |
| SLC25A21     | 8.72E-11 | 1 | 0.884471545  | 1.847676497 |
| SLC25A22     | 8.28E-11 | 1 | 0.95474127   | 1.938342289 |
| SLC25A25     | 8.25E-11 | 1 | 0.957875998  | 1.942609736 |
| SLC25A3      | 8.18E-11 | 1 | -1.648458171 | 0.318885796 |
| SLC25A32     | 7.39E-11 | 1 | 1.891666513  | 3.7534858   |
| SLC25A33     | 7.15E-11 | 1 | -2.978214266 | 0.126490179 |
| SLC25A38     | 6.97E-11 | 1 | -3.429694919 | 0.09137557  |
| SLC25A39     | 6.95E-11 | 1 | -1.618433896 | 0.322634794 |
| SLC25A4      | 6.61E-11 | 1 | -2.967180331 | 0.127517352 |
| SLC25A48     | 6.54E-11 | 1 | 1.120172182  | 2.178679283 |
| SLC25A5      | 6.07E-11 | 1 | 1.362002947  | 2.580021985 |
| SLC25A6      | 5.87E-11 | 1 | -3.129856269 | 0.097465745 |
| SLC26A2      | 5.81E-11 | 1 | -0.972991387 | 0.509369543 |
| SLC26A4      | 5.73E-11 | 1 | 1.73119085   | 3.321467229 |
| SLC26A8      | 5.37E-11 | 1 | -2.912194513 | 0.132654349 |
| SLC27A2      | 5.34E-11 | 1 | 3.163420503  | 9.109965315 |
| SLC27A5      | 5.31E-11 | 1 | 0.657456157  | 1.578067423 |
| SLC28A1      | 5.22E-11 | 1 | 1.700320721  | 3.249931994 |
| SLC29A2      | 5.14E-11 | 1 | -2.741244807 | 0.147740355 |
| SLC2A14      | 5.09E-11 | 1 | 1.285751198  | 2.438846842 |
| SLC2A4       | 5.04E-11 | 1 | 1.530086269  | 2.902609165 |
| SLC2A9       | 4.85E-11 | 1 | -3.421492537 | 0.087710551 |
| SLC30A2      | 4.81E-11 | 1 | -2.63372265  | 0.161106835 |
| SLC30A4      | 4.78E-11 | 1 | -2.013677721 | 0.247369096 |
| SLC31A1      | 4.53E-11 | 1 | -1.197686021 | 0.434148988 |
| SLC35A2      | 4.52E-11 | 1 | 1.617691675  | 3.071471937 |
| SLC35B1      | 4.34E-11 | 1 | 0.55496942   | 1.469204215 |
| SLC35B2      | 4.27E-11 | 1 | 0.644153446  | 1.563790636 |
| SLC35F3      | 4.14E-11 | 1 | -3.449288385 | 0.081947668 |
| SLC35F6      | 4.02E-11 | 1 | -2.511474892 | 0.168536485 |



|            |          |   |              |             |
|------------|----------|---|--------------|-------------|
| SLC35G1    | 3.95E-11 | 1 | -2.215945503 | 0.215168577 |
| SLC37A4    | 3.90E-11 | 1 | -2.695373693 | 0.151901361 |
| SLC39A1    | 3.84E-11 | 1 | -1.831415394 | 0.280516874 |
| SLC39A14   | 3.77E-11 | 1 | 1.760911437  | 3.389907796 |
| SLC39A3    | 3.55E-11 | 1 | 0.741627539  | 1.672657974 |
| SLC39A4    | 3.54E-11 | 1 | 2.508993876  | 5.851408074 |
| SLC3A1     | 3.53E-11 | 1 | 1.285076883  | 2.440258024 |
| SLC3A2     | 3.50E-11 | 1 | -1.096183218 | 0.465735284 |
| SLC43A1    | 3.44E-11 | 1 | 0.632776356  | 1.550736896 |
| SLC43A2    | 3.43E-11 | 1 | -2.523249284 | 0.171621045 |
| SLC43A3    | 3.31E-11 | 1 | -0.571927126 | 0.672608594 |
| SLC44A3    | 3.26E-11 | 1 | 1.520480643  | 2.875042317 |
| SLC44A5    | 3.23E-11 | 1 | -2.619709479 | 0.160757041 |
| SLC45A4    | 3.09E-11 | 1 | 0.804691564  | 1.747307147 |
| SLC46A3    | 3.01E-11 | 1 | 1.146307941  | 2.217826579 |
| SLC4A5     | 2.96E-11 | 1 | 1.493911323  | 2.81654578  |
| SLC50A1    | 2.94E-11 | 1 | -1.6394429   | 0.317578651 |
| SLC5A1     | 2.92E-11 | 1 | 1.36454976   | 2.575819846 |
| SLC5A6     | 2.80E-11 | 1 | 1.210731876  | 2.315481767 |
| SLC5A9     | 2.58E-11 | 1 | 0.57479456   | 1.490009443 |
| SLC6A11    | 2.54E-11 | 1 | 1.293376093  | 2.452702983 |
| SLC6A14    | 2.54E-11 | 1 | 1.012698816  | 2.018378645 |
| SLC6A15    | 2.44E-11 | 1 | -2.31050342  | 0.198989007 |
| SLC6A16    | 2.40E-11 | 1 | -4.2357883   | 0.048243123 |
| SLC6A2     | 2.22E-11 | 1 | -3.136117324 | 0.112944394 |
| SLC6A4     | 2.22E-11 | 1 | -2.897583007 | 0.127970832 |
| SLC6A6     | 2.21E-11 | 1 | 1.773244576  | 3.434778066 |
| SLC6A8     | 2.11E-11 | 1 | -1.856798204 | 0.274228134 |
| SLC7A1     | 2.08E-11 | 1 | -0.791555107 | 0.576793524 |
| SLC7A11    | 2.07E-11 | 1 | 1.228059309  | 2.343571973 |
| SLC7A2     | 1.98E-11 | 1 | -0.830704781 | 0.561398036 |
| SLC7A5     | 1.97E-11 | 1 | 1.604657858  | 3.046995198 |
| SLC7A6     | 1.96E-11 | 1 | -6.187095279 | 0.008063969 |
| SLC8A1     | 1.96E-11 | 1 | 1.072141369  | 2.106749189 |
| SLC9A4     | 1.94E-11 | 1 | -2.504239344 | 0.176022939 |
| SLC9B2     | 1.94E-11 | 1 | 1.627303062  | 3.092169049 |
| SLC9C1     | 1.92E-11 | 1 | 1.262253443  | 2.40247638  |
| SLCO2A1    | 1.90E-11 | 1 | 1.4200924    | 2.676496609 |
| SLCO2B1    | 1.89E-11 | 1 | 0.977030074  | 1.970350654 |
| SLCO3A1    | 1.89E-11 | 1 | 1.838271891  | 3.609370372 |
| SLCO4A1    | 1.88E-11 | 1 | -2.450446152 | 0.178148049 |
| SLCO5A1    | 1.87E-11 | 1 | -3.426909166 | 0.09077141  |
| SLFNL1-AS1 | 1.83E-11 | 1 | 2.7742845    | 7.386630572 |
| SLIRP      | 1.80E-11 | 1 | -2.359838357 | 0.190145143 |
| SLIT2      | 1.79E-11 | 1 | -1.74064599  | 0.294576859 |
| SLIT3      | 1.79E-11 | 1 | -3.997969119 | 0.042428093 |
| SLITRK4    | 1.77E-11 | 1 | 1.135256499  | 2.197155356 |
| SMAD3      | 1.75E-11 | 1 | 2.401779076  | 5.44935814  |
| SMAD7      | 1.66E-11 | 1 | 0.641738741  | 1.560761695 |
| SMAP2      | 1.64E-11 | 1 | 1.690534631  | 3.261362551 |
| SMARCA2    | 1.56E-11 | 1 | 1.173766361  | 2.258632782 |
| SMARCD2    | 1.56E-11 | 1 | 0.906201059  | 1.874622899 |
| SMC1A      | 1.55E-11 | 1 | -1.79867174  | 0.285396866 |
| SMC5-AS1   | 1.54E-11 | 1 | 0.895111307  | 1.860182354 |
| SMG1P1     | 1.45E-11 | 1 | -1.385350461 | 0.382643894 |
| SMG6       | 1.45E-11 | 1 | 2.771763336  | 6.836652182 |
| SMIM12     | 1.42E-11 | 1 | 1.481097681  | 2.792491266 |
| SMIM14     | 1.36E-11 | 1 | 1.300213995  | 2.463052599 |
| SMKR1      | 1.31E-11 | 1 | -5.78375324  | 0.017087109 |
| SMN1       | 1.29E-11 | 1 | -2.366495569 | 0.193681812 |
| SMOC1      | 1.26E-11 | 1 | 1.054944047  | 2.07821768  |
| SMPD2      | 1.25E-11 | 1 | -1.371133771 | 0.384639903 |
| SMPDL3B    | 1.24E-11 | 1 | 0.523435167  | 1.437938542 |
| SMS        | 1.22E-11 | 1 | 0.948993129  | 1.932681348 |
| SMYD2      | 1.18E-11 | 1 | -1.417613199 | 0.374223681 |
| SMYD5      | 1.13E-11 | 1 | 2.06502412   | 4.236776856 |
| SNAPC4     | 1.12E-11 | 1 | -1.70240344  | 0.304473996 |
| SND1       | 1.10E-11 | 1 | 1.215627147  | 2.323008184 |
| SNHG1      | 1.09E-11 | 1 | -2.118582508 | 0.229004895 |
| SNHG12     | 1.07E-11 | 1 | -1.534238991 | 0.341362569 |
| SNHG15     | 1.02E-11 | 1 | 1.111344067  | 2.160475132 |
| SNHG16     | 9.74E-12 | 1 | 0.632599005  | 1.550835931 |
| SNHG17     | 9.69E-12 | 1 | -2.361152898 | 0.191211189 |
| SNHG18     | 9.66E-12 | 1 | -1.444833475 | 0.36605916  |
| SNHG19     | 9.56E-12 | 1 | 0.955970594  | 1.940634683 |
| SNHG20     | 9.11E-12 | 1 | 1.254743268  | 2.387301212 |
| SNHG25     | 8.96E-12 | 1 | -1.193595953 | 0.435655193 |
| SNHG3      | 8.92E-12 | 1 | -3.643165885 | 0.067793378 |
| SNHG4      | 8.76E-12 | 1 | -1.969951    | 0.254541067 |
| SNHG5      | 8.52E-12 | 1 | 1.28011197   | 2.432149652 |
| SNHG6      | 8.48E-12 | 1 | 0.805610592  | 1.748961851 |
| SNHG7      | 8.25E-12 | 1 | 0.516905752  | 1.431563707 |
| SNHG8      | 8.22E-12 | 1 | -2.481612527 | 0.170331671 |
| SNHG9      | 8.18E-12 | 1 | 1.286220269  | 2.449229457 |
| SNORA13    | 8.04E-12 | 1 | 1.60193519   | 3.037230839 |
| SNORA14B   | 8.03E-12 | 1 | 1.39699243   | 2.637759332 |
| SNORA33    | 7.89E-12 | 1 | 2.287634994  | 4.913997768 |
| SNORA45    | 7.76E-12 | 1 | -1.27668134  | 0.409532406 |
| SNORA55    | 7.74E-12 | 1 | 1.337672014  | 2.532771527 |
| SNORA71A   | 7.16E-12 | 1 | 1.848396283  | 3.67202723  |
| SNORA71B   | 7.13E-12 | 1 | 1.108734655  | 2.156998325 |
| SNORA71D   | 6.94E-12 | 1 | 2.491776872  | 5.913949563 |
| SNORA80    | 6.86E-12 | 1 | -4.504749067 | 0.042985129 |

|             |          |   |              |             |
|-------------|----------|---|--------------|-------------|
| SNORD100    | 6.82E-12 | 1 | 1.518037742  | 2.866070986 |
| SNORD101    | 6.64E-12 | 1 | 1.998393568  | 4.029046586 |
| SNORD11     | 6.59E-12 | 1 | -2.585817606 | 0.156802735 |
| SNORD116-13 | 6.07E-12 | 1 | 1.98161717   | 3.956576065 |
| SNORD11B    | 6.07E-12 | 1 | 0.733929579  | 1.663435468 |
| SNORD12B    | 5.92E-12 | 1 | -1.880346156 | 0.269470871 |
| SNORD12C    | 5.91E-12 | 1 | -1.522962473 | 0.347410435 |
| SNORD14E    | 5.72E-12 | 1 | -1.393077208 | 0.378403333 |
| SNORD15B    | 5.54E-12 | 1 | 1.512485258  | 2.853302901 |
| SNORD20     | 5.53E-12 | 1 | 1.588496354  | 3.015665662 |
| SNORD3A     | 5.41E-12 | 1 | 0.635190366  | 1.554116541 |
| SNORD3B-1   | 5.25E-12 | 1 | -5.172446039 | 0.024851107 |
| SNORD3B-2   | 5.03E-12 | 1 | 1.652863101  | 3.15011917  |
| SNORD46     | 4.98E-12 | 1 | 1.308016696  | 2.477135075 |
| SNORD7      | 4.87E-12 | 1 | 1.119188706  | 2.174246763 |
| SNORD70     | 4.77E-12 | 1 | -1.662442582 | 0.315693108 |
| SNORD83A    | 4.51E-12 | 1 | -1.559777656 | 0.338833628 |
| SNORD91B    | 4.48E-12 | 1 | -3.426214733 | 0.092451289 |
| SNORD99     | 4.46E-12 | 1 | 0.992855281  | 1.990827013 |
| snoU2_19    | 4.45E-12 | 1 | 0.987294806  | 1.983843951 |
| snoU2-30    | 4.36E-12 | 1 | -2.071605033 | 0.233019357 |
| SNRK-AS1    | 4.34E-12 | 1 | -1.445657937 | 0.36651129  |
| SNRNP25     | 4.30E-12 | 1 | 0.879249799  | 1.840004467 |
| SNRNP40     | 4.27E-12 | 1 | -2.02225221  | 0.244693282 |
| SNRPA       | 4.23E-12 | 1 | -3.027971215 | 0.121672107 |
| SNRPA1      | 4.07E-12 | 1 | -1.49255046  | 0.354325281 |
| SNRPB       | 4.06E-12 | 1 | 1.538268892  | 2.906171645 |
| SNRPC       | 4.03E-12 | 1 | -1.456722907 | 0.362118259 |
| SNRPD1      | 3.65E-12 | 1 | 0.92494627   | 1.899461102 |
| SNRPD2      | 3.60E-12 | 1 | 1.286442454  | 2.441587671 |
| SNRPD3      | 3.59E-12 | 1 | -4.822892369 | 0.024915334 |
| SNRPE       | 3.51E-12 | 1 | 0.860179514  | 1.815646779 |
| SNRPF       | 3.43E-12 | 1 | 0.789771997  | 1.730063045 |
| SNRPG       | 3.39E-12 | 1 | -0.918229013 | 0.528367621 |
| SNRPGP9     | 3.33E-12 | 1 | -2.139159353 | 0.220236863 |
| SNU13       | 3.28E-12 | 1 | -3.091516677 | 0.113726275 |
| SNX15       | 3.27E-12 | 1 | -1.345979014 | 0.393045726 |
| SNX18P3     | 3.14E-12 | 1 | -5.38623287  | 0.02228674  |
| SNX18P7     | 3.11E-12 | 1 | 0.865831306  | 1.823235187 |
| SNX22       | 3.09E-12 | 1 | -1.350740441 | 0.389912259 |
| SNX24       | 3.07E-12 | 1 | -1.13509476  | 0.45327748  |
| SNX5        | 2.94E-12 | 1 | -0.849343739 | 0.554330418 |
| SOBP        | 2.92E-12 | 1 | -0.691041874 | 0.618997111 |
| SOD1        | 2.82E-12 | 1 | -0.761501258 | 0.589463237 |
| SORB51      | 2.82E-12 | 1 | -1.198470252 | 0.435557882 |
| SORD        | 2.80E-12 | 1 | -2.46280146  | 0.178992896 |
| SORL1       | 2.79E-12 | 1 | 0.800080442  | 1.741649611 |
| SORT1       | 2.73E-12 | 1 | -1.88537576  | 0.269240353 |
| SOWAHB      | 2.64E-12 | 1 | 1.048160677  | 2.069693105 |
| SOX2        | 2.59E-12 | 1 | -1.140337363 | 0.451706939 |
| SOX6        | 2.55E-12 | 1 | -0.908445475 | 0.532557726 |
| SOX9        | 2.53E-12 | 1 | -1.460468149 | 0.361985504 |
| SOX9-AS1    | 2.40E-12 | 1 | 0.972800206  | 1.963035196 |
| SP110       | 2.34E-12 | 1 | 1.384185391  | 2.611330715 |
| SP140L      | 2.32E-12 | 1 | -7.150717077 | 0.006055588 |
| SPAG17      | 2.28E-12 | 1 | 1.352326343  | 2.554350418 |
| SPAG5       | 2.26E-12 | 1 | -1.134256506 | 0.455200777 |
| SPAG7       | 2.20E-12 | 1 | -1.687948432 | 0.309987422 |
| SPARCL1     | 2.16E-12 | 1 | -1.112387861 | 0.462298027 |
| SPATA1      | 2.01E-12 | 1 | -2.230524685 | 0.210189506 |
| SPATA6      | 1.96E-12 | 1 | 1.253411811  | 2.384862852 |
| SPC24       | 1.95E-12 | 1 | -0.910568802 | 0.531669556 |
| SPC25       | 1.90E-12 | 1 | 0.877389862  | 1.839472303 |
| SPDL1       | 1.86E-12 | 1 | 0.710441709  | 1.637947776 |
| SPECC1      | 1.86E-12 | 1 | -0.92137547  | 0.527890174 |
| SPESP1      | 1.68E-12 | 1 | 0.768237065  | 1.703936252 |
| SPG21       | 1.66E-12 | 1 | -2.078204611 | 0.229421002 |
| SPIN4       | 1.66E-12 | 1 | 0.920973516  | 1.894088573 |
| SPIN4-AS1   | 1.66E-12 | 1 | 1.404775265  | 2.652017933 |
| SPINK13     | 1.65E-12 | 1 | 0.904084657  | 1.872771175 |
| SPINK7      | 1.56E-12 | 1 | 1.861752302  | 3.638642512 |
| SPINK9      | 1.55E-12 | 1 | 2.485891095  | 5.920099596 |
| SPNS2       | 1.54E-12 | 1 | 1.129752379  | 2.188625957 |
| SPPL3       | 1.41E-12 | 1 | 0.755579991  | 1.688867933 |
| SPR         | 1.38E-12 | 1 | 0.862919983  | 1.819691482 |
| SPRED2      | 1.30E-12 | 1 | 0.74374814   | 1.675321973 |
| SPRED3      | 1.26E-12 | 1 | 1.993849254  | 3.992267854 |
| SPRR2A      | 1.24E-12 | 1 | -4.529924369 | 0.042496293 |
| SPRY2       | 1.20E-12 | 1 | -0.909705734 | 0.53214488  |
| SPRY4       | 1.20E-12 | 1 | 0.984372286  | 1.979124476 |
| SPRYD4      | 1.19E-12 | 1 | -5.391512802 | 0.019382837 |
| SPTLC3      | 1.14E-12 | 1 | 1.264103867  | 2.406067046 |
| SPTSSB      | 1.10E-12 | 1 | 1.909838167  | 3.760385248 |
| SQLE        | 9.99E-13 | 1 | 0.720415633  | 1.648091949 |
| SQSTM1      | 9.72E-13 | 1 | -3.22584296  | 0.092114592 |
| SRD5A3      | 9.63E-13 | 1 | 1.835785526  | 3.578493123 |
| SRGAP1      | 9.31E-13 | 1 | 1.263124418  | 2.412372856 |
| SRGAP2      | 9.22E-13 | 1 | -1.524839256 | 0.347022374 |
| SRM         | 8.77E-13 | 1 | 1.963324223  | 3.953328301 |
| SRP72       | 8.69E-13 | 1 | -1.070849097 | 0.475832859 |
| SRPK1       | 8.56E-13 | 1 | 1.746965955  | 3.366413284 |
| SRPRB       | 8.09E-13 | 1 | 0.987400026  | 1.982675246 |
| SRRD        | 8.04E-13 | 1 | 0.859378453  | 1.814423164 |

|             |          |   |              |             |
|-------------|----------|---|--------------|-------------|
| SRRM1P3     | 7.89E-13 | 1 | -2.717943405 | 0.140053429 |
| SRSF12      | 7.73E-13 | 1 | 1.324847667  | 2.505738543 |
| SRSF7       | 7.68E-13 | 1 | 1.60016992   | 3.038439678 |
| SRSF9       | 7.47E-13 | 1 | 2.331173     | 5.221149122 |
| SS18L2      | 6.97E-13 | 1 | -2.067937116 | 0.236710693 |
| SSB         | 6.57E-13 | 1 | 3.203134126  | 9.333929426 |
| SSBP1       | 6.41E-13 | 1 | -0.663407116 | 0.631242241 |
| SSBP3       | 6.29E-13 | 1 | 1.691615575  | 3.254519057 |
| SSBP3-AS1   | 5.97E-13 | 1 | 1.421563753  | 2.681349132 |
| SSBP4       | 5.80E-13 | 1 | -2.985375798 | 0.115606527 |
| SSC4D       | 5.76E-13 | 1 | 1.506254476  | 2.841068333 |
| SSFA2       | 5.62E-13 | 1 | -1.270746417 | 0.412859185 |
| SSPN        | 5.40E-13 | 1 | 1.366592177  | 2.582881571 |
| SSPO        | 5.17E-13 | 1 | -2.22014788  | 0.214557052 |
| SSR2        | 5.07E-13 | 1 | 1.400418905  | 2.640223132 |
| SSR4        | 5.06E-13 | 1 | -6.456221136 | 0.01092429  |
| SSRP1       | 5.02E-13 | 1 | 1.565532997  | 2.960933043 |
| SSU72       | 4.96E-13 | 1 | -2.364202737 | 0.193463259 |
| ST13        | 4.75E-13 | 1 | 1.225859956  | 2.339682171 |
| ST13P20     | 4.44E-13 | 1 | -1.213633631 | 0.431059575 |
| ST3GAL1     | 4.43E-13 | 1 | -4.586112391 | 0.0382848   |
| ST3GAL4-AS1 | 4.42E-13 | 1 | -2.945928248 | 0.12733482  |
| ST3GAL5     | 4.41E-13 | 1 | 1.216303752  | 2.32533974  |
| ST3GAL6     | 4.39E-13 | 1 | -5.73411759  | 0.011336606 |
| ST6GALNAC2  | 4.32E-13 | 1 | 0.944337944  | 1.925932043 |
| ST6GALNAC3  | 4.21E-13 | 1 | 0.881941817  | 1.846129895 |
| ST6GALNAC4  | 4.07E-13 | 1 | 1.09269799   | 2.133238808 |
| ST6GALNAC5  | 4.00E-13 | 1 | -3.426242669 | 0.088273508 |
| ST8SIA1     | 3.77E-13 | 1 | 1.339528992  | 2.532973557 |
| STAC2       | 3.44E-13 | 1 | -2.017463697 | 0.244602637 |
| STAG3       | 3.35E-13 | 1 | -1.104843455 | 0.464326574 |
| STARD13     | 3.21E-13 | 1 | -1.972098796 | 0.25439697  |
| STARD9      | 3.16E-13 | 1 | -5.485023439 | 0.01316615  |
| STAT2       | 3.14E-13 | 1 | -1.521390348 | 0.346511707 |
| STC1        | 3.14E-13 | 1 | -1.236225737 | 0.424342653 |
| STC2        | 3.13E-13 | 1 | 0.899125742  | 1.868048627 |
| STEAP1      | 3.08E-13 | 1 | 0.704152115  | 1.629813151 |
| STEAP3      | 2.91E-13 | 1 | 1.656466073  | 3.154675972 |
| STEAP3-AS1  | 2.85E-13 | 1 | -3.447649776 | 0.07479     |
| STIM1       | 2.82E-13 | 1 | 1.00307316   | 2.004396692 |
| STIP1       | 2.70E-13 | 1 | 2.040086917  | 4.179465082 |
| STK25       | 2.70E-13 | 1 | 0.827663547  | 1.775182776 |
| STK26       | 2.64E-13 | 1 | 0.518273482  | 1.432610558 |
| STK38       | 2.57E-13 | 1 | -1.472817827 | 0.360099335 |
| STMN3       | 2.53E-13 | 1 | -3.218827892 | 0.103524187 |
| STOML2      | 2.40E-13 | 1 | 1.031306829  | 2.046023805 |
| STON1       | 2.38E-13 | 1 | 1.390685719  | 2.626266264 |
| STON2       | 2.31E-13 | 1 | -0.554755886 | 0.68053235  |
| STOX1       | 2.27E-13 | 1 | -2.413085995 | 0.185202167 |
| STOX2       | 2.24E-13 | 1 | -4.02776491  | 0.060791248 |
| STPG2       | 2.20E-13 | 1 | 0.808993462  | 1.752897224 |
| STRA13      | 2.04E-13 | 1 | 1.507926149  | 2.848898852 |
| STRA6       | 2.03E-13 | 1 | 2.958410629  | 7.865344236 |
| STS         | 2.02E-13 | 1 | -1.345342606 | 0.391859184 |
| STUB1       | 2.01E-13 | 1 | 1.27815672   | 2.428231624 |
| STXBP1      | 1.97E-13 | 1 | 1.722387945  | 3.30154878  |
| STYK1       | 1.96E-13 | 1 | 0.909122015  | 1.879552638 |
| SUCLG2      | 1.96E-13 | 1 | -1.27355057  | 0.413520022 |
| SUCLG2-AS1  | 1.85E-13 | 1 | -5.5361849   | 0.019763351 |
| SULF2       | 1.80E-13 | 1 | 1.22065648   | 2.330610093 |
| SULT1A1     | 1.78E-13 | 1 | -4.086397831 | 0.041812748 |
| SUMO2P14    | 1.75E-13 | 1 | 1.373292867  | 2.591643596 |
| SUPT16H     | 1.67E-13 | 1 | 1.638423945  | 3.120743171 |
| SUPT6H      | 1.64E-13 | 1 | -3.848458208 | 0.068362452 |
| SUPV3L1     | 1.61E-13 | 1 | 1.064014477  | 2.091113525 |
| SURF2       | 1.50E-13 | 1 | 1.939636626  | 3.867024098 |
| SURF6       | 1.48E-13 | 1 | 0.691222132  | 1.616225359 |
| SUSD4       | 1.45E-13 | 1 | -6.66454427  | 0.009681559 |
| SUV39H1     | 1.44E-13 | 1 | 1.460414759  | 2.75705511  |
| SUV420H1    | 1.37E-13 | 1 | -4.710656882 | 0.032640622 |
| SV2B        | 1.33E-13 | 1 | 1.49523616   | 2.839786823 |
| SVIL-AS1    | 1.26E-13 | 1 | 2.266878216  | 4.825871265 |
| SWT1        | 1.24E-13 | 1 | 1.346362777  | 2.543602048 |
| SYBU        | 1.20E-13 | 1 | -6.04463167  | 0.015112701 |
| SYCP2       | 1.19E-13 | 1 | -2.889839304 | 0.134095043 |
| SYCP3       | 1.14E-13 | 1 | 1.377517747  | 2.610552142 |
| SYK         | 1.14E-13 | 1 | -4.873828923 | 0.022620252 |
| SYN2        | 1.11E-13 | 1 | -2.154101738 | 0.219606175 |
| SYNC        | 1.08E-13 | 1 | -3.665321859 | 0.06276534  |
| SYNE1       | 1.07E-13 | 1 | 1.195876543  | 2.292126101 |
| SYNE3       | 1.07E-13 | 1 | 3.474687532  | 12.93568174 |
| SYNJ2       | 1.06E-13 | 1 | 1.486886845  | 2.807560053 |
| SYNM        | 1.02E-13 | 1 | 1.825763233  | 3.54552109  |
| SYNP02      | 9.65E-14 | 1 | -1.206921049 | 0.433067214 |
| SYNRG       | 9.51E-14 | 1 | 0.850306838  | 1.80489416  |
| SYT1        | 9.47E-14 | 1 | -3.838109155 | 0.065966943 |
| SYT15       | 8.99E-14 | 1 | 0.886419593  | 1.84964561  |
| SYT2        | 8.74E-14 | 1 | 0.779204643  | 1.716352873 |
| SYT9        | 8.64E-14 | 1 | 1.07302192   | 2.104231196 |
| TACC3       | 8.42E-14 | 1 | 0.949378933  | 1.931807729 |
| TACO1       | 8.33E-14 | 1 | -3.149380054 | 0.110311506 |
| TACR1       | 8.13E-14 | 1 | 1.192486738  | 2.28619203  |
| TAF4B       | 8.09E-14 | 1 | 1.464786592  | 2.765308591 |

|            |          |   |              |             |
|------------|----------|---|--------------|-------------|
| TAFA9      | 7.95E-14 | 1 | -7.254234984 | 0.004671423 |
| TAGLN2     | 7.65E-14 | 1 | -2.648718646 | 0.158740018 |
| TALDO1     | 7.17E-14 | 1 | 1.053784196  | 2.07716078  |
| TANG06     | 7.19E-14 | 1 | 1.088425747  | 2.129631689 |
| TAP2       | 6.84E-14 | 1 | 1.525537469  | 2.885886621 |
| TAPT1-AS1  | 6.35E-14 | 1 | -5.406885474 | 0.022365295 |
| TARBP1     | 6.34E-14 | 1 | 1.824754773  | 3.548266343 |
| TARS       | 6.34E-14 | 1 | 2.292509659  | 4.933443125 |
| TARS2      | 6.14E-14 | 1 | 1.895071703  | 3.722043    |
| TATDN2     | 5.93E-14 | 1 | 1.430957589  | 2.696962149 |
| TATDN2P2   | 5.70E-14 | 1 | 0.613195813  | 1.52993488  |
| TATDN3     | 5.63E-14 | 1 | -5.181417076 | 0.022994019 |
| TBC1D24    | 5.37E-14 | 1 | 0.955946491  | 1.941156619 |
| TBC1D30    | 5.34E-14 | 1 | -5.316026375 | 0.024915603 |
| TBC1D9     | 5.25E-14 | 1 | -1.655624758 | 0.31481819  |
| TBCA       | 5.21E-14 | 1 | 1.236481081  | 2.35815181  |
| TBCD       | 4.86E-14 | 1 | 1.567560779  | 2.97504163  |
| TBL2       | 4.76E-14 | 1 | 1.790540156  | 3.463198241 |
| TBRG4      | 4.71E-14 | 1 | -3.242733269 | 0.105105137 |
| TBX19      | 4.57E-14 | 1 | 1.788930639  | 3.479645965 |
| TBX3       | 4.32E-14 | 1 | 2.436772055  | 5.435424414 |
| TCEA3      | 4.34E-14 | 1 | -1.640920564 | 0.319521596 |
| TCEB1      | 4.01E-14 | 1 | -4.823363688 | 0.023435427 |
| TCEB1P21   | 4.01E-14 | 1 | 1.134147095  | 2.195689663 |
| TCEB3      | 3.82E-14 | 1 | 0.596183302  | 1.511858457 |
| TCERG1     | 3.84E-14 | 1 | -4.557045643 | 0.039339455 |
| TCF7L1     | 3.40E-14 | 1 | 1.228438104  | 2.344562278 |
| TCF7L1-IT1 | 3.35E-14 | 1 | 1.271522797  | 2.414255736 |
| TCF7L2     | 3.32E-14 | 1 | -3.066708255 | 0.117291228 |
| TCN1       | 3.32E-14 | 1 | 1.261230995  | 2.407054864 |
| TCOF1      | 3.28E-14 | 1 | 0.637590117  | 1.555962513 |
| TCP1       | 3.25E-14 | 1 | 1.453290691  | 2.747092128 |
| TCP11L1    | 3.23E-14 | 1 | 0.593495299  | 1.508999251 |
| TCP11L2    | 3.14E-14 | 1 | 0.960642116  | 1.947867408 |
| TCTE3      | 3.14E-14 | 1 | -2.070978653 | 0.232560853 |
| TCTEX1D2   | 2.68E-14 | 1 | -0.673704795 | 0.626554089 |
| TDG        | 2.61E-14 | 1 | 1.041006232  | 2.058199343 |
| TDP1       | 2.63E-14 | 1 | -5.147189103 | 0.028157527 |
| TDRD1      | 2.44E-14 | 1 | -4.398213849 | 0.045037343 |
| TDRD12     | 2.38E-14 | 1 | 1.646588892  | 3.13164257  |
| TEAD4      | 2.36E-14 | 1 | -1.14804699  | 0.449833965 |
| TENM1      | 2.32E-14 | 1 | -3.278134171 | 0.094877315 |
| TENM2      | 2.28E-14 | 1 | 1.666677082  | 3.178909643 |
| TENM3      | 2.21E-14 | 1 | 1.294705971  | 2.455280248 |
| TENM4      | 2.13E-14 | 1 | 3.139186167  | 9.474574362 |
| TEP1       | 2.07E-14 | 1 | 1.079699258  | 2.114569914 |
| TET2       | 1.91E-14 | 1 | -1.255883038 | 0.417154466 |
| TET2-AS1   | 1.87E-14 | 1 | -1.738813356 | 0.294399306 |
| TEX14      | 1.89E-14 | 1 | 0.514601037  | 1.428784244 |
| TEX264     | 1.81E-14 | 1 | 1.508906709  | 2.847762716 |
| TFAP2A     | 1.75E-14 | 1 | 1.393932401  | 2.645761726 |
| TFAP2C     | 1.77E-14 | 1 | 0.587398443  | 1.502596106 |
| TFAP4      | 1.65E-14 | 1 | 0.987529598  | 1.983438614 |
| TFB1M      | 1.65E-14 | 1 | 1.076178915  | 2.115099678 |
| TFB2M      | 1.55E-14 | 1 | 1.212327474  | 2.319103771 |
| TFDP1      | 1.55E-14 | 1 | 1.087963891  | 2.127493314 |
| TFFP1      | 1.45E-14 | 1 | -4.188687004 | 0.04989635  |
| TFPI       | 1.52E-14 | 1 | 1.308266847  | 2.481957821 |
| TFRC       | 1.40E-14 | 1 | -2.420404618 | 0.177630139 |
| TG         | 1.29E-14 | 1 | 1.271538932  | 2.415274563 |
| TGFB111    | 1.34E-14 | 1 | 1.182140338  | 2.272716344 |
| TGFBR2     | 1.34E-14 | 1 | -5.322828514 | 0.022667665 |
| TGFBR3     | 1.17E-14 | 1 | 0.792774287  | 1.732635421 |
| TGM5       | 1.14E-14 | 1 | -0.613022356 | 0.653625121 |
| THAP2      | 1.09E-14 | 1 | 1.588056359  | 3.009033609 |
| THAP4      | 1.13E-14 | 1 | -1.407616369 | 0.375275104 |
| THBS1      | 1.14E-14 | 1 | 0.888488757  | 1.851858367 |
| THEM6      | 9.55E-15 | 1 | 0.640488422  | 1.559706826 |
| THG1L      | 9.66E-15 | 1 | 1.649319355  | 3.13883595  |
| THOC3      | 1.02E-14 | 1 | -3.436603663 | 0.088366731 |
| THOC5      | 1.02E-14 | 1 | -1.403978037 | 0.374897065 |
| THOP1      | 8.88E-15 | 1 | 1.539736101  | 2.919061213 |
| THRAP3     | 8.88E-15 | 1 | 1.504007649  | 2.842139115 |
| THRB       | 8.10E-15 | 1 | 1.202714227  | 2.312209123 |
| THRB-IT1   | 7.77E-15 | 1 | 1.036454447  | 2.051552358 |
| THSD1      | 7.55E-15 | 1 | 2.265780079  | 4.824896047 |
| THSD4-AS1  | 8.44E-15 | 1 | 1.043394548  | 2.062084666 |
| TIAM2      | 7.11E-15 | 1 | -2.223294622 | 0.213276434 |
| TICAM1     | 6.77E-15 | 1 | 1.086289918  | 2.12392914  |
| TICRR      | 6.55E-15 | 1 | 1.703977467  | 3.258620688 |
| TIMELESS   | 6.66E-15 | 1 | 1.053281221  | 2.075414591 |
| TIMM10     | 6.77E-15 | 1 | 1.427968691  | 2.690827364 |
| TIMM10B    | 7.11E-15 | 1 | 2.040545669  | 4.211851072 |
| TIMM13     | 5.88E-15 | 1 | -1.755583699 | 0.293603043 |
| TIMM17A    | 6.22E-15 | 1 | -5.714110285 | 0.018015542 |
| TIMM21     | 6.33E-15 | 1 | 1.792211436  | 3.498206554 |
| TIMM22     | 6.22E-15 | 1 | 1.359701488  | 2.57001725  |
| TIMM23     | 6.22E-15 | 1 | -0.947567114 | 0.517287924 |
| TIMM44     | 6.22E-15 | 1 | 1.022490093  | 2.035219886 |
| TIMM50     | 5.00E-15 | 1 | 1.65901788   | 3.172834573 |
| TIMM8A     | 5.44E-15 | 1 | 1.854228293  | 3.624243958 |
| TIMM8B     | 4.66E-15 | 1 | 1.103249897  | 2.149711783 |
| TIMM9      | 4.22E-15 | 1 | -1.679108104 | 0.311147382 |

|             |          |   |              |             |
|-------------|----------|---|--------------|-------------|
| TIMMDC1     | 4.44E-15 | 1 | 2.536403813  | 5.850154732 |
| TIMP2       | 4.11E-15 | 1 | -1.175882549 | 0.441659782 |
| TIMP3       | 3.66E-15 | 1 | 1.768878672  | 3.420740162 |
| TIMP4       | 3.00E-15 | 1 | 1.343319827  | 2.539706518 |
| TINF2       | 3.22E-15 | 1 | -3.757785446 | 0.072746204 |
| TIPIN       | 3.11E-15 | 1 | 0.953875962  | 1.937495664 |
| TK1         | 2.78E-15 | 1 | -2.163982652 | 0.22295846  |
| TKT         | 2.89E-15 | 1 | 1.087811591  | 2.128916463 |
| TLCD2       | 2.89E-15 | 1 | 0.732575654  | 1.661710238 |
| TLE2        | 3.22E-15 | 1 | -2.897335862 | 0.127671644 |
| TLE4        | 3.11E-15 | 1 | 1.162897721  | 2.242822381 |
| TLR1        | 2.66E-15 | 1 | 0.960203862  | 1.945865606 |
| TLR10       | 3.22E-15 | 1 | -0.639722435 | 0.641715591 |
| TLR2        | 1.78E-15 | 1 | -3.701001949 | 0.072833259 |
| TLR5        | 1.89E-15 | 1 | 1.210775405  | 2.314894708 |
| TLR6        | 1.55E-15 | 1 | 1.151788535  | 2.228317985 |
| TMA16       | 1.78E-15 | 1 | 0.673095071  | 1.595690219 |
| TMCS        | 2.22E-15 | 1 | 1.373508633  | 2.60523607  |
| TMCC1       | 2.11E-15 | 1 | 2.389962632  | 5.247297359 |
| TMCO3       | 2.22E-15 | 1 | -4.927310938 | 0.028390691 |
| TMCO6       | 2.00E-15 | 1 | 1.880642673  | 3.699897684 |
| TMED3       | 1.55E-15 | 1 | -1.87016545  | 0.271432411 |
| TMED8       | 2.22E-15 | 1 | 0.775820727  | 1.713154362 |
| TMED9       | 1.89E-15 | 1 | 1.667739886  | 3.177726166 |
| TMEM107     | 2.11E-15 | 1 | -2.325368196 | 0.197336971 |
| TMEM109     | 2.22E-15 | 1 | -6.581341055 | 0.010255393 |
| TMEM11      | 2.00E-15 | 1 | 1.195353162  | 2.290885351 |
| TMEM116     | 1.78E-15 | 1 | -2.401430129 | 0.189070812 |
| TMEM120B    | 2.00E-15 | 1 | 1.509373566  | 2.851030008 |
| TMEM132B    | 5.55E-16 | 1 | 0.96166498   | 1.951527557 |
| TMEM136     | 8.88E-16 | 1 | -1.071765507 | 0.475181728 |
| TMEM139     | 6.66E-16 | 1 | -2.123338417 | 0.227750518 |
| TMEM141     | 8.88E-16 | 1 | 1.193441062  | 2.288138323 |
| TMEM147     | 6.66E-16 | 1 | 1.017920253  | 2.027798863 |
| TMEM147-AS1 | 6.66E-16 | 1 | 1.778256036  | 3.439788273 |
| TMEM159     | 5.55E-16 | 1 | -1.309968634 | 0.403164754 |
| TMEM161A    | 5.55E-16 | 1 | 0.838176303  | 1.788236943 |
| TMEM169     | 9.99E-16 | 1 | -2.427901507 | 0.185587854 |
| TMEM183A    | 5.55E-16 | 1 | -2.502110786 | 0.174926743 |
| TMEM184B    | 5.55E-16 | 1 | 1.588183301  | 3.010249776 |
| TMEM186     | 1.33E-15 | 1 | 0.726719838  | 1.655567235 |
| TMEM192     | 7.77E-16 | 1 | 0.834822039  | 1.784078879 |
| TMEM206     | 5.55E-16 | 1 | 1.333829992  | 2.522173761 |
| TMEM213     | 5.55E-16 | 1 | 1.116664133  | 2.169446954 |
| TMEM231     | 5.55E-16 | 1 | -3.300228261 | 0.093813231 |
| TMEM241     | 1.22E-15 | 1 | -0.796576628 | 0.574915949 |
| TMEM246     | 8.88E-16 | 1 | -3.539027679 | 0.077957214 |
| TMEM254     | 1.11E-15 | 1 | 0.945550736  | 1.929517199 |
| TMEM258     | 9.99E-16 | 1 | 1.420415656  | 2.679219136 |
| TMEM261     | 1.33E-15 | 1 | -1.872436587 | 0.269855578 |
| TMEM33      | 9.99E-16 | 1 | 1.588348626  | 3.019530991 |
| TMEM38A     | 1.11E-15 | 1 | 1.009325201  | 2.016173107 |
| TMEM38B     | 5.55E-16 | 1 | 1.372092009  | 2.594541968 |
| TMEM63C     | 1.22E-15 | 1 | 1.448196029  | 2.729458006 |
| TMEM69      | 0        | 1 | 1.128879631  | 2.18761503  |
| TMEM70      | 0        | 1 | 0.872427498  | 1.831167293 |
| TMEM71      | 0        | 1 | 1.130059041  | 2.192771124 |
| TMEM97      | 4.44E-16 | 1 | -3.934899826 | 0.061645432 |
| TMEM98      | 2.22E-16 | 1 | -1.239795812 | 0.422277025 |
| TMEM99      | 0        | 1 | -1.431927114 | 0.369445015 |
| TMEM9B-AS1  | 0        | 1 | 1.526314379  | 2.896770074 |
| TMOD2       | 1.11E-16 | 1 | 1.290588783  | 2.447272506 |
| TMPRSS11A   | 3.33E-16 | 1 | -5.215745894 | 0.019945886 |
| TMPRSS11D   | 0        | 1 | 2.245804559  | 4.748953712 |
| TMPRSS11GP  | 0        | 1 | 1.759660053  | 3.387184205 |
| TMPRSS2     | 0        | 1 | 0.853030897  | 1.806978616 |
| TMPRSS3     | 2.22E-16 | 1 | 1.093019981  | 2.134083325 |
| TMPRSS5     | 0        | 1 | 1.006685022  | 2.011392778 |
| TMSB15B     | 0        | 1 | 1.190648659  | 2.282952168 |
| TMSB4X      | 0        | 1 | 1.268055855  | 2.41265051  |
| TMTC1       | 0        | 1 | -1.685797385 | 0.308686071 |
| TMTC4       | 0        | 1 | 2.141991715  | 4.42234748  |
| TMX2        | 0        | 1 | 3.09233826   | 8.626461923 |
| TNC         | 0        | 1 | 1.027235662  | 2.038590655 |
| TNFAIP1     | 0        | 1 | -3.509028225 | 0.086925599 |
| TNFAIP8L3   | 0        | 1 | 0.719003315  | 1.646195388 |
| TNFRSF10A   | 0        | 1 | 1.260999763  | 2.399050874 |
| TNFRSF10B   | 0        | 1 | 1.1712663    | 2.253075619 |
| TNFRSF10C   | 0        | 1 | -3.922070797 | 0.061795626 |
| TNFRSF10D   | 0        | 1 | 1.001318916  | 2.002960164 |
| TNFRSF11A   | 0        | 1 | 1.299061346  | 2.464240418 |
| TNFRSF19    | 0        | 1 | 1.565596566  | 2.962463136 |
| TNFRSF21    | 1.11E-16 | 1 | 0.882059961  | 1.844446862 |
| TNFRSF10    | 1.11E-16 | 1 | 0.817316147  | 1.762875687 |
| TNFRSF12    | 0        | 1 | -5.025245234 | 0.029690053 |
| TNFRSF18    | 0        | 1 | -2.138294416 | 0.224008098 |
| TNFRSF4     | 0        | 1 | -1.162645312 | 0.445646886 |
| TNIK        | 0        | 1 | 0.979151085  | 1.972660548 |
| TNN1        | 0        | 1 | 1.206532057  | 2.313732744 |
| TNNT2       | 2.22E-16 | 1 | 1.235166573  | 2.357768148 |
| TNNT3       | 0        | 1 | 1.358953056  | 2.569821296 |
| TNPO2       | 0        | 1 | 1.213909408  | 2.32392694  |
| TNRC6B      | 0        | 1 | -1.181407591 | 0.440511309 |

|            |          |   |              |             |
|------------|----------|---|--------------|-------------|
| TNRC6C     | 0        | 1 | 0.877804555  | 1.837998715 |
| TNRC6C-AS1 | 4.44E-16 | 1 | 0.571173342  | 1.486133562 |
| TOE1       | 0        | 1 | 1.613589058  | 3.065947288 |
| TOMM20     | 0        | 1 | -3.575173365 | 0.079861893 |
| TOMM22     | 0        | 1 | -1.509552499 | 0.350088876 |
| TOMM34     | 0        | 1 | 1.516721959  | 2.871276946 |
| TOMM40     | 0        | 1 | 1.561783239  | 2.952389984 |
| TOMM40L    | 0        | 1 | 1.213710672  | 2.319580397 |
| TOMM5      | 0        | 1 | 1.348814358  | 2.54736974  |
| TOMM7      | 0        | 1 | 4.014039594  | 18.70270089 |
| TONSL      | 0        | 1 | 1.463130052  | 2.762717448 |
| TONSL-AS1  | 0        | 1 | 1.275076978  | 2.422266612 |
| TOR3A      | 0        | 1 | 0.777977816  | 1.715336239 |
| TOX        | 0        | 1 | -2.085316898 | 0.234842409 |
| TP53I3     | 0        | 1 | -3.928110532 | 0.063018144 |
| TP53INP2   | 0        | 1 | 1.125418567  | 2.186053867 |
| TP1        | 0        | 1 | 0.608015098  | 1.524282486 |
| TPM1       | 0        | 1 | 2.391115832  | 5.272936054 |
| TPP1       | 0        | 1 | -3.646230021 | 0.070993697 |
| TPRG1      | 0        | 1 | -4.289215018 | 0.038455963 |
| TPRXL      | 1.11E-16 | 1 | -3.624316158 | 0.075844955 |
| TPT1-AS1   | 0        | 1 | 0.610246907  | 1.526710864 |
| TPT1P5     | 0        | 1 | -2.772768431 | 0.146099808 |
| TPT1P8     | 0        | 1 | 1.076947014  | 2.111828355 |
| TPTE2P5    | 0        | 1 | 0.539559822  | 1.453840835 |
| TPTEP1     | 0        | 1 | 0.868044767  | 1.826203861 |
| TPX2       | 0        | 1 | -0.918447566 | 0.528968121 |
| TRABD2A    | 0        | 1 | 5.615178432  | 52.17005122 |
| TRABD2B    | 0        | 1 | -1.332721639 | 0.396015955 |
| TRAF1      | 0        | 1 | 0.938882539  | 1.917370398 |
| TRAIIP     | 0        | 1 | -2.223123773 | 0.211979127 |
| TRAM2      | 0        | 1 | -2.853062896 | 0.132199935 |
| TRANK1     | 2.22E-16 | 1 | -5.037850593 | 0.022032766 |
| TRAP1      | 0        | 1 | -0.792999821 | 0.576894084 |
| TRAPPC2L   | 0        | 1 | -2.749102985 | 0.142516634 |
| TRERF1     | 0        | 1 | -1.483524427 | 0.356543142 |
| TRHDE-AS1  | 0        | 1 | -1.831140806 | 0.277948173 |
| TRIAP1     | 0        | 1 | -0.540876896 | 0.687335694 |
| TRIB2      | 0        | 1 | -4.017205064 | 0.053650122 |
| TRIL       | 0        | 1 | -3.485420405 | 0.087369456 |
| TRIM11     | 0        | 1 | 1.979080292  | 3.945808204 |
| TRIM16L    | 0        | 1 | -2.313390951 | 0.200948964 |
| TRIM2      | 0        | 1 | 1.214561905  | 2.323157408 |
| TRIM22     | 0        | 1 | -1.812546606 | 0.283407924 |
| TRIM25     | 0        | 1 | 1.144375723  | 2.210685833 |
| TRIM46     | 0        | 1 | 2.177119891  | 4.546503048 |
| TRIM5      | 0        | 1 | 0.560717225  | 1.475109578 |
| TRIM55     | 0        | 1 | 0.591689852  | 1.507388382 |
| TRIM56     | 0        | 1 | 1.833951542  | 3.571218733 |
| TRIM6      | 0        | 1 | -1.473996745 | 0.358618482 |
| TRIM65     | 0        | 1 | -3.857897034 | 0.059556089 |
| TRIM69     | 0        | 1 | -3.230671351 | 0.098258656 |
| TRIP13     | 4.44E-16 | 1 | 1.176250193  | 2.261012783 |
| TRIP6      | 0        | 1 | 1.18996418   | 2.282562592 |
| TRIT1      | 0        | 1 | -0.695135728 | 0.617465995 |
| TRMT1      | 0        | 1 | 1.227571497  | 2.345883875 |
| TRMT10C    | 0        | 1 | 1.67278696   | 3.193165505 |
| TRMT11     | 0        | 1 | 2.704253649  | 6.605178325 |
| TRMT112    | 0        | 1 | -0.982740235 | 0.505969659 |
| TRMT6      | 0        | 1 | 0.918198752  | 1.890050537 |
| TRMU       | 0        | 1 | 0.620578952  | 1.537851473 |
| TRO        | 0        | 1 | 0.566425813  | 1.480991372 |
| TROAP      | 0        | 1 | 1.604336912  | 3.040984324 |
| TRPC1      | 0        | 1 | 1.374368843  | 2.592917128 |
| TRPM2      | 0        | 1 | 1.334215896  | 2.521898592 |
| TRPM8      | 0        | 1 | 2.661947887  | 6.393785141 |
| TRPS1      | 0        | 1 | 1.063250097  | 2.089840252 |
| TRPV6      | 0        | 1 | -1.56825746  | 0.337118086 |
| TRUB2      | 0        | 1 | 1.586193552  | 3.002673545 |
| TSEN2      | 0        | 1 | -7.276117427 | 0.006341398 |
| TSEN34     | 0        | 1 | -2.985302181 | 0.125149306 |
| TSEN54     | 0        | 1 | -0.585340053 | 0.666438447 |
| TSFM       | 0        | 1 | 1.339452521  | 2.531871155 |
| TSHR       | 2.22E-16 | 1 | -1.011792612 | 0.49518245  |
| TSHZ2      | 0        | 1 | 1.518844506  | 2.867507872 |
| TSIX       | 0        | 1 | 2.217210562  | 4.653426182 |
| TSPAN1     | 1.11E-16 | 1 | -1.299334988 | 0.404785478 |
| TSPAN10    | 0        | 1 | 1.598210091  | 3.033271428 |
| TSPAN3     | 0        | 1 | -1.562732546 | 0.33787254  |
| TSPAN31    | 0        | 1 | -3.495323708 | 0.084294018 |
| TSPAN8     | 0        | 1 | -1.446184383 | 0.36616782  |
| TSPYL6     | 0        | 1 | -0.692022952 | 0.618682046 |
| TSR1       | 0        | 1 | -2.316652392 | 0.200288713 |
| TSSC1      | 0        | 1 | 1.814207822  | 3.517768511 |
| TSTA3      | 0        | 1 | 0.664480796  | 1.58560277  |
| TTBK2      | 0        | 1 | -2.034087147 | 0.244152498 |
| TTC38      | 0        | 1 | 2.805040345  | 7.090092162 |
| TTC39A     | 0        | 1 | 1.46584829   | 2.768766917 |
| TTC39B     | 0        | 1 | 2.037649096  | 4.105971429 |
| TTC9       | 0        | 1 | 2.504734064  | 5.68601082  |
| ITF2       | 0        | 1 | -1.139789024 | 0.453496944 |
| ITLL12     | 0        | 1 | 1.646701126  | 3.13129402  |
| ITLL7      | 0        | 1 | -0.86099913  | 0.54994595  |

|           |          |   |              |             |
|-----------|----------|---|--------------|-------------|
| TTLL7-IT1 | 0        | 1 | 1.101286979  | 2.146240943 |
| TTN       | 0        | 1 | 1.64290519   | 3.123338638 |
| TTN-AS1   | 0        | 1 | 4.297134466  | 21.64914836 |
| TTYH2     | 0        | 1 | 1.463977595  | 2.760055585 |
| TUB       | 3.33E-16 | 1 | 0.589346717  | 1.50483253  |
| TUBA1B    | 0        | 1 | -1.295648078 | 0.406770715 |
| TUBA1C    | 0        | 1 | 0.808021397  | 1.7510885   |
| TUBA4A    | 0        | 1 | 0.771172996  | 1.706995937 |
| TUBAL3    | 0        | 1 | 1.160456986  | 2.235443297 |
| TUBB      | 0        | 1 | 0.775701594  | 1.712068678 |
| TUBB2A    | 0        | 1 | -0.895072833 | 0.537399043 |
| TUBB2B    | 0        | 1 | -1.30705513  | 0.403669539 |
| TUBB4B    | 0        | 1 | 1.368970571  | 2.58582181  |
| TUBG1     | 0        | 1 | 1.851475156  | 3.614092176 |
| TUBGCP2   | 0        | 1 | 1.512427458  | 2.860690615 |
| TUBGCP4   | 0        | 1 | 1.669412687  | 3.189840583 |
| TUBGCP5   | 0        | 1 | 0.997887283  | 1.998280001 |
| TUFM      | 0        | 1 | 1.549104468  | 2.935357753 |
| TUSC2     | 0        | 1 | 1.500230434  | 2.832223441 |
| TUSC8     | 0        | 1 | 1.299109212  | 2.467555152 |
| TVP23C    | 0        | 1 | 1.857227351  | 3.640852481 |
| TVP23CP1  | 0        | 1 | 1.781282776  | 3.444131807 |
| TXLNG     | 0        | 1 | 1.379819026  | 2.603998571 |
| TXN       | 0        | 1 | 0.890987649  | 1.8554795   |
| TXN2      | 0        | 1 | 2.869345347  | 7.359548714 |
| TXNDC17   | 2.22E-16 | 1 | 1.323852159  | 2.505725515 |
| TXNIP     | 0        | 1 | 1.153164468  | 2.224279134 |
| TXNL4A    | 0        | 1 | -0.53638792  | 0.689388395 |
| TXNRD1    | 0        | 1 | -7.813459955 | 0.002954509 |
| TXNRD3    | 0        | 1 | 1.16021808   | 2.235928805 |
| TYMS      | 0        | 1 | -2.929746524 | 0.130569364 |
| U2AF2     | 0        | 1 | 1.173541261  | 2.259133173 |
| UBA52     | 0        | 1 | 1.656566564  | 3.155662651 |
| UBAC1     | 0        | 1 | 1.843872017  | 3.590370349 |
| UBAP2L    | 0        | 1 | -2.854334427 | 0.131447439 |
| UBB       | 0        | 1 | -2.949485599 | 0.122088961 |
| UBC       | 0        | 1 | -1.30398596  | 0.404593875 |
| UBE2C     | 0        | 1 | 0.883010857  | 1.844320513 |
| UBE2G2    | 0        | 1 | -4.214683182 | 0.049719668 |
| UBE2I     | 0        | 1 | -2.205378251 | 0.216480834 |
| UBE2L3    | 0        | 1 | 1.260533339  | 2.398160457 |
| UBE2L4    | 0        | 1 | -3.447804894 | 0.09143257  |
| UBE2Q2P1  | 0        | 1 | -3.647773592 | 0.076055276 |
| UBE2S     | 0        | 1 | 0.777775494  | 1.715207544 |
| UBE2T     | 0        | 1 | 0.962716473  | 1.950046668 |
| UBE3C     | 0        | 1 | 1.53075967   | 2.891073718 |
| UBE3D     | 0        | 1 | -10.86423738 | 0.000501611 |
| UBIAD1    | 0        | 1 | 1.04722921   | 2.067643315 |
| UBL4A     | 0        | 1 | -1.69265758  | 0.306666894 |
| UBL5      | 0        | 1 | 0.7081224    | 1.634007896 |
| UBL7      | 0        | 1 | -5.493549785 | 0.016431682 |
| UBQLN2    | 1.11E-16 | 1 | -3.244022935 | 0.101756037 |
| UBXN8     | 0        | 1 | -2.6020886   | 0.162078352 |
| UCHL5     | 0        | 1 | -2.626848346 | 0.159277696 |
| UCK2      | 0        | 1 | 2.785454693  | 6.935686606 |
| UFC1      | 0        | 1 | -0.615899971 | 0.652431366 |
| UGDH-AS1  | 0        | 1 | -4.489010701 | 0.04386312  |
| UHRF1     | 0        | 1 | -1.162720703 | 0.445817921 |
| UHRF1BP1  | 0        | 1 | -1.786355443 | 0.286290891 |
| UHRF2P1   | 0        | 1 | -2.303617173 | 0.197562256 |
| ULK3      | 0        | 1 | 1.01817682   | 2.026493679 |
| UMODL1    | 0        | 1 | 0.757502513  | 1.69086422  |
| UMPS      | 0        | 1 | 1.514340356  | 2.859972357 |
| UNC93B1   | 4.44E-16 | 1 | 1.212622808  | 2.318318801 |
| UNG       | 0        | 1 | -3.009832815 | 0.124090368 |
| UPP2      | 0        | 1 | 1.081219593  | 2.121159741 |
| UQCC2     | 0        | 1 | 1.581151276  | 2.994729546 |
| UQCR10    | 0        | 1 | -1.132850961 | 0.455086669 |
| UQCR11    | 0        | 1 | -6.767783505 | 0.00855397  |
| UQCRC1    | 2.22E-16 | 1 | 0.554817155  | 1.46915576  |
| UQCRC2    | 0        | 1 | 0.8929708    | 1.858009302 |
| UQCRFS1   | 0        | 1 | 0.776028226  | 1.713169493 |
| UQCRFS1P3 | 3.33E-16 | 1 | 1.253096262  | 2.386950502 |
| UQCRH     | 0        | 1 | 1.448618549  | 2.734204829 |
| UQCRHL    | 0        | 1 | 1.661771043  | 3.168889282 |
| UQCRQ     | 0        | 1 | 1.435956889  | 2.708949411 |
| URB1      | 0        | 1 | 1.670510987  | 3.188948061 |
| URB2      | 0        | 1 | 1.368255754  | 2.583033657 |
| UROD      | 0        | 1 | 2.223842623  | 4.696901709 |
| UROS      | 4.44E-16 | 1 | 1.186586247  | 2.27728531  |
| USMG5     | 0        | 1 | 1.355715268  | 2.570907703 |
| USMG5P1   | 0        | 1 | 1.195758493  | 2.291911882 |
| USP10     | 0        | 1 | 1.225334887  | 2.339003331 |
| USP2-AS1  | 0        | 1 | 1.072687765  | 2.103813621 |
| USP36     | 0        | 1 | 1.306584715  | 2.477699908 |
| USP39     | 0        | 1 | 1.043339049  | 2.062326576 |
| USP5      | 0        | 1 | 1.630399323  | 3.098538968 |
| USP6      | 0        | 1 | 0.787824779  | 1.726718756 |
| UTP11L    | 0        | 1 | 1.016150076  | 2.026938426 |
| UTP14A    | 0        | 1 | -0.751838464 | 0.593624739 |
| UTP15     | 0        | 1 | -1.571005688 | 0.334122633 |
| UTP20     | 0        | 1 | -9.497702319 | 0.001295662 |
| UTP3      | 0        | 1 | 2.792807503  | 6.93557321  |

|               |          |   |              |             |
|---------------|----------|---|--------------|-------------|
| UTP6          | 0        | 1 | -2.435000681 | 0.179018921 |
| UTRN          | 0        | 1 | 1.003220769  | 2.006522793 |
| VAMP1         | 2.22E-16 | 1 | -1.132870652 | 0.455976163 |
| VAMP2         | 0        | 1 | -1.848590127 | 0.276784693 |
| VANGL2        | 1.11E-16 | 1 | 0.999972811  | 2.002231534 |
| VARS          | 0        | 1 | -0.73649756  | 0.600018148 |
| VASH2         | 0        | 1 | 1.236143346  | 2.35627781  |
| VCAM1         | 0        | 1 | -3.737878549 | 0.069493283 |
| VCAN          | 0        | 1 | -3.149064748 | 0.112626944 |
| VCAN-AS1      | 0        | 1 | 1.579807406  | 3.004218311 |
| VCP           | 0        | 1 | -0.977967804 | 0.507382851 |
| VDAC1         | 0        | 1 | 1.566139331  | 2.961220232 |
| VDAC2         | 3.33E-16 | 1 | 0.705797227  | 1.631433662 |
| VDAC3         | 0        | 1 | 0.968888068  | 1.959154571 |
| VEGFA         | 0        | 1 | 1.48206648   | 2.796542567 |
| VEGFB         | 0        | 1 | 0.99978131   | 2.000264844 |
| VEPH1         | 0        | 1 | 0.82484081   | 1.771585291 |
| VILL          | 0        | 1 | 1.079489414  | 2.113726078 |
| VIPR1-AS1     | 0        | 1 | 0.672797329  | 1.594540448 |
| VIT           | 0        | 1 | 0.86030739   | 1.815801794 |
| VKORC1        | 0        | 1 | 1.321974859  | 2.503814801 |
| VMA21         | 0        | 1 | -1.720555069 | 0.301447087 |
| VN1R108P      | 0        | 1 | 1.919651192  | 3.79198842  |
| VN1R21P       | 0        | 1 | 2.874140552  | 7.421176821 |
| VNN2          | 0        | 1 | -2.070528667 | 0.2374353   |
| VNN3          | 0        | 1 | 1.529134286  | 2.889533479 |
| VOPP1         | 4.44E-16 | 1 | 0.75832638   | 1.691982645 |
| VPRBP         | 0        | 1 | 0.753965143  | 1.68651258  |
| VPS25         | 0        | 1 | 1.227805649  | 2.344055726 |
| VPS33B        | 3.33E-16 | 1 | 1.728475326  | 3.317150977 |
| VPS37B        | 0        | 1 | 0.930835259  | 1.907287534 |
| VRK1          | 0        | 1 | -3.440814117 | 0.0920043   |
| VSIG10        | 0        | 1 | 1.08831022   | 2.127433327 |
| VSNL1         | 0        | 1 | 0.787455092  | 1.726523565 |
| VSTM5         | 0        | 1 | 0.828701793  | 1.776627771 |
| VTI1BP1       | 0        | 1 | 1.021020471  | 2.030130727 |
| VTRNA1-3      | 0        | 1 | -2.186117161 | 0.217690167 |
| VWA1          | 0        | 1 | 1.05562024   | 2.0792141   |
| VWA5A         | 0        | 1 | -2.8812157   | 0.134984325 |
| VWC2L         | 0        | 1 | 1.278309903  | 2.426705567 |
| VWDE          | 0        | 1 | -3.170460392 | 0.109559652 |
| WARS          | 0        | 1 | -1.472518808 | 0.35900179  |
| WASF3-AS1     | 0        | 1 | 1.146927203  | 2.215492124 |
| WBP1L         | 1.11E-16 | 1 | 1.492161648  | 2.813706744 |
| WBSR16        | 4.44E-16 | 1 | 0.858232693  | 1.813219936 |
| WBSR22        | 0        | 1 | 1.196519702  | 2.294783719 |
| WDFY2         | 0        | 1 | -2.523477458 | 0.171798103 |
| WDFY3         | 0        | 1 | 0.827828454  | 1.775172165 |
| WDR12         | 0        | 1 | 2.131686982  | 4.416536357 |
| WDR17         | 0        | 1 | 1.990084755  | 3.976130052 |
| WDR18         | 0        | 1 | 1.479151038  | 2.791121132 |
| WDR3          | 0        | 1 | 1.269386272  | 2.414708731 |
| WDR36         | 0        | 1 | 1.471028632  | 2.773225954 |
| WDR4          | 0        | 1 | 1.349039273  | 2.548577041 |
| WDR43         | 0        | 1 | 1.036792278  | 2.052000165 |
| WDR45B        | 0        | 1 | 1.3100326    | 2.480572543 |
| WDR46         | 0        | 1 | 1.647047961  | 3.134631765 |
| WDR5          | 0        | 1 | 1.536252481  | 2.902686867 |
| WDR55         | 0        | 1 | 1.562828321  | 2.955358232 |
| WDR62         | 0        | 1 | -1.871657857 | 0.269620464 |
| WDR7          | 1.11E-16 | 1 | 1.497928587  | 2.832697139 |
| WDR74         | 0        | 1 | 0.73458188   | 1.664160549 |
| WDR76         | 0        | 1 | -1.847205743 | 0.277845191 |
| WDR77         | 0        | 1 | 1.242442091  | 2.370671792 |
| WDR78         | 0        | 1 | -4.078293665 | 0.05652648  |
| WDR83OS       | 0        | 1 | -1.619068382 | 0.325151268 |
| WDR90         | 0        | 1 | 1.671669474  | 3.194599273 |
| WEE2          | 0        | 1 | 0.869864537  | 1.828496744 |
| WEE2-AS1      | 0        | 1 | -0.767131653 | 0.587369448 |
| WFDC2         | 0        | 1 | 1.301455332  | 2.465398086 |
| WHAMMP2       | 0        | 1 | 1.288737031  | 2.44505489  |
| WI2-3658N16.1 | 0        | 1 | -0.634214235 | 0.644130858 |
| WIPF1         | 0        | 1 | 1.151430547  | 2.22485961  |
| WIPF3         | 0        | 1 | 0.952558273  | 1.935615946 |
| WNK3          | 0        | 1 | 1.254096314  | 2.386142235 |
| WNT10A        | 0        | 1 | 1.043975642  | 2.062412444 |
| WNT10B        | 2.22E-16 | 1 | 0.869898004  | 1.828389054 |
| WNT11         | 0        | 1 | 0.842010429  | 1.792886538 |
| WNT2B         | 0        | 1 | 0.650120541  | 1.569415153 |
| WRAP53        | 1.11E-16 | 1 | 0.969751191  | 1.958884968 |
| WTIP          | 0        | 1 | -2.312874411 | 0.199877368 |
| WWC3          | 0        | 1 | 1.325159434  | 2.506183616 |
| WWTR1-IT1     | 0        | 1 | 0.854720106  | 1.808446712 |
| XAF1          | 0        | 1 | 1.955629241  | 3.920236521 |
| XIST          | 0        | 1 | 1.421070251  | 2.680885515 |
| XK            | 0        | 1 | -0.833753155 | 0.560312394 |
| XKRX          | 0        | 1 | 0.809996555  | 1.753876093 |
| XPNPEP3       | 0        | 1 | -1.751297317 | 0.296491451 |
| XPO5          | 0        | 1 | -4.510909471 | 0.035817433 |
| XPO6          | 0        | 1 | -1.128416322 | 0.457173514 |
| XPO7          | 0        | 1 | -3.376165571 | 0.087120286 |
| XPOT          | 0        | 1 | 0.702370124  | 1.627382311 |
| XRCC2         | 0        | 1 | 1.257808172  | 2.391586116 |



|                  |          |   |   |              |             |
|------------------|----------|---|---|--------------|-------------|
| XRCC6            |          | 0 | 1 | 1.656444222  | 3.154287227 |
| Xxbac-B476C20.13 |          | 0 | 1 | 2.000979757  | 4.03191458  |
| Xxbac-BPG154L12  |          | 0 | 1 | 0.52410352   | 1.438246511 |
| Xxbac-BPGBPG55C  |          | 0 | 1 | 1.056176687  | 2.081473584 |
| XXYL1            |          | 0 | 1 | 2.684842673  | 6.471996063 |
| XYLB             |          | 0 | 1 | 1.224998925  | 2.344050618 |
| YARS             |          | 0 | 1 | 0.614713264  | 1.531514405 |
| YARS2            |          | 0 | 1 | -2.817458793 | 0.137768493 |
| YBX1             |          | 0 | 1 | -3.617833358 | 0.078341652 |
| YDJC             |          | 0 | 1 | 1.645626546  | 3.14037743  |
| YEATS4           |          | 0 | 1 | 2.405012239  | 5.340459774 |
| YIF1A            | 2.22E-16 | 1 | 1 | -2.622102364 | 0.160400114 |
| YIEFN3           |          | 0 | 1 | -0.965472935 | 0.511474451 |
| YKT6             |          | 0 | 1 | -1.793313589 | 0.284906786 |
| YPEL1            |          | 0 | 1 | -3.030656443 | 0.115782418 |
| YPEL3            |          | 0 | 1 | -1.20203824  | 0.433510605 |
| YRDC             |          | 0 | 1 | -1.373846368 | 0.384881454 |
| YWHAZP4          |          | 0 | 1 | -0.734350772 | 0.600942868 |
| ZBED6CL          |          | 0 | 1 | -4.650199751 | 0.031442268 |
| ZBTB20           |          | 0 | 1 | -1.818154398 | 0.282404677 |
| ZBTB20-AS1       |          | 0 | 1 | 1.629685202  | 3.114767701 |
| ZBTB20-AS4       |          | 0 | 1 | -1.718758896 | 0.301381235 |
| ZBTB24           |          | 0 | 1 | -2.170156319 | 0.221140667 |
| ZBTB34           |          | 0 | 1 | -6.736915699 | 0.009070784 |
| ZBTB38           |          | 0 | 1 | -6.794064215 | 0.008587254 |
| ZBTB4            | 2.22E-16 | 1 | 1 | -3.169572555 | 0.110052792 |
| ZBTB46           |          | 0 | 1 | -1.185424919 | 0.439352266 |
| ZBTB7C           |          | 0 | 1 | -3.262118343 | 0.096902714 |
| ZCZHC1A          |          | 0 | 1 | -3.565291962 | 0.076103277 |
| ZC3H6            |          | 0 | 1 | -3.750729646 | 0.072241805 |
| ZC3H8            | 2.22E-16 | 1 | 1 | -3.819012646 | 0.06447107  |
| ZCCHC5           | 1.11E-16 | 1 | 1 | -2.317456006 | 0.196114011 |
| ZCWPVW2          |          | 0 | 1 | -1.350272486 | 0.391183898 |
| ZDHHC15          |          | 0 | 1 | 1.256515429  | 2.38941016  |
| ZDHHC9           |          | 0 | 1 | 1.336432649  | 2.525393491 |
| ZFAND2A          |          | 0 | 1 | 1.641484217  | 3.120024602 |
| ZFAS1            |          | 0 | 1 | 1.800112681  | 3.482656868 |
| ZFH3             |          | 0 | 1 | 1.515184566  | 2.85846408  |
| ZFP2             |          | 0 | 1 | 1.732767679  | 3.323904036 |
| ZFP36L1          |          | 0 | 1 | 1.559081249  | 2.947392483 |
| ZFP36L2          |          | 0 | 1 | 1.662552406  | 3.165971969 |
| ZFP82            |          | 0 | 1 | 1.647763646  | 3.134493813 |
| ZFYVE1           |          | 0 | 1 | 1.247152036  | 2.373874497 |
| ZHX2             |          | 0 | 1 | 1.343949268  | 2.542030158 |
| ZHX3             |          | 0 | 1 | 1.622511183  | 3.079435693 |
| ZIK1             |          | 0 | 1 | 1.689412575  | 3.225873296 |
| ZKSCAN1          |          | 0 | 1 | 1.563293581  | 2.955394897 |
| ZKSCAN3          |          | 0 | 1 | 1.364178194  | 2.574936237 |
| ZMI21-AS1        |          | 0 | 1 | 1.712201089  | 3.276861583 |
| ZMYND19          |          | 0 | 1 | 1.21134544   | 2.315637451 |
| ZNF117           |          | 0 | 1 | 1.509556126  | 2.847370581 |
| ZNF121           |          | 0 | 1 | 1.464419635  | 2.759591248 |
| ZNF136           |          | 0 | 1 | 1.74858754   | 3.360467694 |
| ZNF137P          |          | 0 | 1 | 1.72245044   | 3.300125734 |
| ZNF14            |          | 0 | 1 | 1.746852942  | 3.357323564 |
| ZNF169           |          | 0 | 1 | 1.607817581  | 3.048141233 |
| ZNF175           |          | 0 | 1 | 1.726798724  | 3.310097308 |
| ZNF204P          |          | 0 | 1 | 1.564870602  | 2.95868581  |
| ZNF211           |          | 0 | 1 | 1.669485785  | 3.181139776 |
| ZNF215           |          | 0 | 1 | 1.683092299  | 3.211652653 |
| ZNF221           |          | 0 | 1 | 1.899012546  | 3.729960656 |
| ZNF223           |          | 0 | 1 | 1.592347745  | 3.016213575 |
| ZNF226           |          | 0 | 1 | 1.453416972  | 2.739665165 |
| ZNF232           |          | 0 | 1 | 1.384887111  | 2.611739659 |
| ZNF233           | 1.11E-16 | 1 | 1 | 1.62259371   | 3.080660079 |
| ZNF235           |          | 0 | 1 | 1.682927766  | 3.21131289  |
| ZNF239           |          | 0 | 1 | 1.792740907  | 3.467468239 |
| ZNF250           |          | 0 | 1 | 1.562806277  | 2.954435276 |
| ZNF251           |          | 0 | 1 | 1.951328103  | 3.868578803 |
| ZNF276           |          | 0 | 1 | 1.406863608  | 2.651670207 |
| ZNF311           |          | 0 | 1 | 1.494293227  | 2.81748865  |
| ZNF324           |          | 0 | 1 | 1.525048073  | 2.878163712 |
| ZNF330           |          | 0 | 1 | 1.778143945  | 3.430096843 |
| ZNF331           |          | 0 | 1 | 0.792305065  | 1.73215725  |
| ZNF333           |          | 0 | 1 | 1.554272142  | 2.938232201 |
| ZNF343           |          | 0 | 1 | 1.327835228  | 2.521208478 |
| ZNF345           |          | 0 | 1 | 0.948918571  | 1.931128071 |
| ZNF350           |          | 0 | 1 | -0.839280274 | 0.558736832 |
| ZNF382           |          | 0 | 1 | 0.785537787  | 1.724504697 |
| ZNF385C          |          | 0 | 1 | 0.690362787  | 1.614031113 |
| ZNF385D          |          | 0 | 1 | -2.217093584 | 0.214913709 |
| ZNF395           |          | 0 | 1 | 0.914599812  | 1.886439845 |
| ZNF396           |          | 0 | 1 | -2.943518853 | 0.125993689 |
| ZNF417           |          | 0 | 1 | -7.668750586 | 0.004591521 |
| ZNF44            |          | 0 | 1 | -1.556015318 | 0.338930438 |
| ZNF442           |          | 0 | 1 | -1.823072709 | 0.280590447 |
| ZNF473           |          | 0 | 1 | 1.993905072  | 4.001552583 |
| ZNF485           |          | 0 | 1 | 0.733754613  | 1.663668249 |
| ZNF490           |          | 0 | 1 | 1.380917659  | 2.604675063 |
| ZNF511           |          | 0 | 1 | 1.008785784  | 2.0145001   |
| ZNF521           |          | 0 | 1 | -2.945309021 | 0.1240096   |
| ZNF528           |          | 0 | 1 | 0.629914741  | 1.547753811 |
| ZNF528-AS1       |          | 0 | 1 | 1.134716585  | 2.196414509 |

|               |          |   |              |             |
|---------------|----------|---|--------------|-------------|
| ZNF532        | 0        | 1 | -1.533053893 | 0.345139422 |
| ZNF555        | 0        | 1 | 2.834506343  | 7.266839202 |
| ZNF559        | 0        | 1 | 1.034450181  | 2.048574149 |
| ZNF561-AS1    | 0        | 1 | 1.320328544  | 2.498108956 |
| ZNF563        | 0        | 1 | 1.74574263   | 3.35739581  |
| ZNF568        | 2.22E-16 | 1 | 1.826113135  | 3.546843421 |
| ZNF581        | 0        | 1 | 1.934689291  | 3.862022678 |
| ZNF584        | 0        | 1 | 1.373347997  | 2.592379422 |
| ZNF585A       | 0        | 1 | 2.101863026  | 4.374835689 |
| ZNF585B       | 1.11E-16 | 1 | 2.350249434  | 5.1219864   |
| ZNF587B       | 0        | 1 | 1.813269344  | 3.51710544  |
| ZNF587P1      | 0        | 1 | 1.361414302  | 2.570352656 |
| ZNF589        | 2.22E-16 | 1 | 2.159123083  | 4.474195761 |
| ZNF594        | 0        | 1 | -1.587788699 | 0.332603716 |
| ZNF606        | 0        | 1 | -1.753365919 | 0.296504553 |
| ZNF608        | 0        | 1 | -2.956605262 | 0.128261254 |
| ZNF611        | 0        | 1 | -0.5794214   | 0.669066686 |
| ZNF615        | 0        | 1 | -1.533047928 | 0.343776693 |
| ZNF622        | 0        | 1 | -1.053122894 | 0.480649118 |
| ZNF641        | 0        | 1 | 0.890645456  | 1.85420565  |
| ZNF660        | 0        | 1 | 1.284791529  | 2.436923596 |
| ZNF662        | 0        | 1 | 1.067074551  | 2.096058817 |
| ZNF670-ZNF695 | 0        | 1 | 2.056632422  | 4.16263318  |
| ZNF674        | 0        | 1 | 1.674550285  | 3.194615935 |
| ZNF676        | 0        | 1 | 0.887744206  | 1.851551988 |
| ZNF69         | 0        | 1 | -2.367288314 | 0.193464514 |
| ZNF692        | 0        | 1 | -4.504657558 | 0.03078998  |
| ZNF695        | 1.11E-16 | 1 | 0.988751413  | 1.987374805 |
| ZNF696        | 3.33E-16 | 1 | 1.343949878  | 2.540595901 |
| ZNF699        | 0        | 1 | -1.476507183 | 0.359100454 |
| ZNF70         | 1.11E-16 | 1 | 1.249819874  | 2.378668955 |
| ZNF701        | 0        | 1 | -2.316897623 | 0.197430384 |
| ZNF703        | 0        | 1 | -2.143241992 | 0.224767065 |
| ZNF711        | 0        | 1 | 0.995925917  | 1.996489329 |
| ZNF713        | 0        | 1 | 0.902360105  | 1.869751208 |
| ZNF725P       | 0        | 1 | -5.781798753 | 0.013233492 |
| ZNF732        | 0        | 1 | 1.93179206   | 3.817075685 |
| ZNF737        | 0        | 1 | 1.179838885  | 2.269047017 |
| ZNF74         | 0        | 1 | 0.685243663  | 1.608508802 |
| ZNF747        | 0        | 1 | -1.492724761 | 0.35281503  |
| ZNF75D        | 0        | 1 | 0.957411676  | 1.942224145 |
| ZNF763        | 0        | 1 | 1.464200928  | 2.76115828  |
| ZNF771        | 1.11E-16 | 1 | 1.380320723  | 2.603561118 |
| ZNF774        | 0        | 1 | -0.933165578 | 0.523074003 |
| ZNF778        | 0        | 1 | -0.842086169 | 0.557428156 |
| ZNF792        | 0        | 1 | 2.069000025  | 4.19992633  |
| ZNF812        | 2.22E-16 | 1 | 1.343511641  | 2.543808808 |
| ZNF829        | 0        | 1 | 1.144919648  | 2.214457967 |
| ZNF83         | 0        | 1 | -2.115183896 | 0.230029344 |
| ZNF830        | 0        | 1 | 0.872035114  | 1.832031003 |
| ZNF836        | 0        | 1 | 0.724320095  | 1.652191466 |
| ZNF846        | 0        | 1 | -1.17393454  | 0.44318381  |
| ZNF852        | 0        | 1 | 1.7070424    | 3.265584842 |
| ZNF860        | 0        | 1 | 1.108256803  | 2.157964015 |
| ZNF879        | 0        | 1 | 1.092394104  | 2.132696429 |
| ZNF880        | 0        | 1 | 0.79557399   | 1.735844406 |
| ZNF90P1       | 1.11E-16 | 1 | 1.382491066  | 2.618267246 |
| ZNRD1         | 0        | 1 | -3.520569026 | 0.086013847 |
| ZP3           | 0        | 1 | 0.967752367  | 1.956099062 |
| ZPR1          | 0        | 1 | 0.690756832  | 1.614524157 |
| ZSCAN23       | 0        | 1 | 0.828478038  | 1.77648226  |
| ZSCAN26       | 0        | 1 | -2.614187589 | 0.155424231 |
| ZSCAN30       | 0        | 1 | -1.73704215  | 0.299402367 |
| ZWINT         | 0        | 1 | 1.464030409  | 2.760728891 |

**Supplementary Table S2 – Summary of GO-term GSEA result**

Differentially expressed genes in 10A.PM tumors were analyzed by GSEA using GO-term gene sets. Grouped nodes in Figure 3B contain the GO-terms listed here. A summary of all GO terms analyzed are also included.

| GROUPINGS:                                                      |  |
|-----------------------------------------------------------------|--|
| <b>Cell Adhesion and Development</b>                            |  |
| GO_CELL_CELL_ADHESION                                           |  |
| GO_REGULATION_OF_GTPASE_ACTIVITY                                |  |
| GO_NEURON_DIFFERENTIATION                                       |  |
| GO_CELLULAR_COMPONENT_MORPHOGENESIS                             |  |
| GO_REGULATION_OF_CELLULAR_COMPONENT_MOVEMENT                    |  |
| GO_CELL_CELL_SIGNALING                                          |  |
| GO_HEART_DEVELOPMENT                                            |  |
| GO_NEGATIVE_REGULATION_OF_DEVELOPMENTAL_PROCESS                 |  |
| GO_CARDIOVASCULAR_SYSTEM_DEVELOPMENT                            |  |
| GO_VASCULATURE_DEVELOPMENT                                      |  |
| GO_BIOLOGICAL_ADHESION                                          |  |
| GO_CELL_MORPHOGENESIS_INVOLVED_IN_DIFFERENTIATION               |  |
| GO_NEURON_DEVELOPMENT                                           |  |
| GO_REGULATION_OF_NERVOUS_SYSTEM_DEVELOPMENT                     |  |
| GO_REGULATION_OF_CELL_DEVELOPMENT                               |  |
| GO_REGULATION_OF_CELL_DIFFERENTIATION                           |  |
| GO_CIRCULATORY_SYSTEM_DEVELOPMENT                               |  |
| GO_CELL_DEVELOPMENT                                             |  |
| GO_REGULATION_OF_NEURON_DIFFERENTIATION                         |  |
| GO_EPITHELIAL_CELL_DIFFERENTIATION                              |  |
| GO_REGULATION_OF_CELL_MORPHOGENESIS                             |  |
| GO_MUSCLE_STRUCTURE_DEVELOPMENT                                 |  |
| GO_NEGATIVE_REGULATION_OF_CELL_DIFFERENTIATION                  |  |
|                                                                 |  |
| <b>Cell Cycle</b>                                               |  |
| GO_CELLULAR_RESPONSE_TO_DNA_DAMAGE_STIMULUS                     |  |
| GO_DNA_REPAIR                                                   |  |
| GO_CELLULAR_RESPONSE_TO_STRESS                                  |  |
| GO_MITOTIC_NUCLEAR_DIVISION                                     |  |
| GO_CHROMATIN_ORGANIZATION                                       |  |
| GO_MITOTIC_CELL_CYCLE                                           |  |
| GO_DNA_METABOLIC_PROCESS                                        |  |
| GO_POSTTRANSCRIPTIONAL_REGULATION_OF_GENE_EXPRESSION            |  |
| GO_PROTEIN_COMPLEX_ASSEMBLY                                     |  |
| GO_REGULATION_OF_CELL_CYCLE_PHASE_TRANSITION                    |  |
| GO_NEGATIVE_REGULATION_OF_ORGANELLE_ORGANIZATION                |  |
| GO_REGULATION_OF_MITOTIC_CELL_CYCLE                             |  |
| GO_PROTEIN_COMPLEX_SUBUNIT_ORGANIZATION                         |  |
| GO_PROTEIN_MODIFICATION_BY_SMALL_PROTEIN_CONJUGATION_OR_REMOVAL |  |
| GO_MACROMOLECULAR_COMPLEX_ASSEMBLY                              |  |
| GO_CELL_CYCLE                                                   |  |
| GO_CELL_DIVISION                                                |  |
| GO_PROTEIN_CATABOLIC_PROCESS                                    |  |
| GO_PROTEIN_COMPLEX_BIOGENESIS                                   |  |
| GO_POSITIVE_REGULATION_OF_PROTEOLYSIS                           |  |
| GO_REGULATION_OF_PROTEOLYSIS                                    |  |
| GO_REGULATION_OF_CELL_CYCLE                                     |  |
| GO_ORGANELLE_ASSEMBLY                                           |  |
| GO_CELLULAR_MACROMOLECULAR_COMPLEX_ASSEMBLY                     |  |
| GO_ORGANELLE_FISSION                                            |  |
| GO_PROTEIN_UBIQUITINATION                                       |  |
| GO_CELL_CYCLE_PROCESS                                           |  |
| GO_CHROMOSOME_ORGANIZATION                                      |  |
| GO_REGULATION_OF_CELL_CYCLE_PROCESS                             |  |
| GO_DNA_CONFORMATION_CHANGE                                      |  |
| GO_NEGATIVE_REGULATION_OF_CELL_CYCLE                            |  |
|                                                                 |  |
| <b>Metabolism</b>                                               |  |
| GO_SMALL_MOLECULE_BIOSYNTHETIC_PROCESS                          |  |
| GO_GENERATION_OF_PRECURSOR_METABOLITES_AND_ENERGY               |  |
| GO_CARBOHYDRATE_METABOLIC_PROCESS                               |  |
| GO_CARBOHYDRATE_DERIVATIVE_BIOSYNTHETIC_PROCESS                 |  |
| GO_NUCLEOSIDE_MONOPHOSPHATE_METABOLIC_PROCESS                   |  |
| GO_CELLULAR_AMINO_ACID_METABOLIC_PROCESS                        |  |
| GO_ORGANIC_ACID_METABOLIC_PROCESS                               |  |
| GO_OXIDATION_REDUCTION_PROCESS                                  |  |
| GO_CARBOHYDRATE_DERIVATIVE_METABOLIC_PROCESS                    |  |
| GO_PURINE_CONTAINING_COMPOUND_METABOLIC_PROCESS                 |  |
| GO_GLYCOSYL_COMPOUND_METABOLIC_PROCESS                          |  |
| GO_COFACTOR_METABOLIC_PROCESS                                   |  |
| GO_NUCLEOBASE_CONTAINING_SMALL_MOLECULE_METABOLIC_PROCESS       |  |
| GO_ORGANOPHOSPHATE_METABOLIC_PROCESS                            |  |
| GO_SINGLE_ORGANISM_BIOSYNTHETIC_PROCESS                         |  |
| GO_TRANSMEMBRANE_TRANSPORT                                      |  |
|                                                                 |  |
| <b>RNA and Protein Synthesis</b>                                |  |
| GO_ESTABLISHMENT_OF_PROTEIN_LOCALIZATION_TO_MEMBRANE            |  |
| GO_RNA_CATABOLIC_PROCESS                                        |  |
| GO_ESTABLISHMENT_OF_PROTEIN_LOCALIZATION                        |  |
| GO_PROTEIN_TARGETING                                            |  |
| GO_SYMBIOSIS_ENCOMPASSING_MUTUALISM_THROUGH_PARASITISM          |  |
| GO_PROTEIN_LOCALIZATION_TO_MEMBRANE                             |  |
| GO_MACROMOLECULE_CATABOLIC_PROCESS                              |  |
| GO_ORGANONITROGEN_COMPOUND_BIOSYNTHETIC_PROCESS                 |  |
| GO_NCRNA_METABOLIC_PROCESS                                      |  |
| GO_TRANSLATIONAL_INITIATION                                     |  |
| GO_PROTEIN_LOCALIZATION                                         |  |
| GO_ORGANIC_CYCLIC_COMPOUND_CATABOLIC_PROCESS                    |  |

|                                                       |
|-------------------------------------------------------|
| GO_VIRAL_LIFE_CYCLE                                   |
| GO_PROTEIN_LOCALIZATION_TO_ORGANELLE                  |
| GO_SINGLE_ORGANISM_CELLULAR_LOCALIZATION              |
| GO_CATABOLIC_PROCESS                                  |
| GO_RIBOSOME_BIOGENESIS                                |
| GO_INTERSPECIES_INTERACTION_BETWEEN_ORGANISMS         |
| GO_NITROGEN_COMPOUND_TRANSPORT                        |
| GO_RRNA_METABOLIC_PROCESS                             |
| GO_PEPTIDE_METABOLIC_PROCESS                          |
| GO_RNA_PROCESSING                                     |
| GO_MRNA_METABOLIC_PROCESS                             |
| GO_CELLULAR_AMIDE_METABOLIC_PROCESS                   |
| GO_AMIDE_BIOSYNTHETIC_PROCESS                         |
| GO_RIBONUCLEOPROTEIN_COMPLEX_BIOGENESIS               |
| GO_MEMBRANE_ORGANIZATION                              |
| RNA and Protein Metabolism                            |
| GO_ESTABLISHMENT_OF_LOCALIZATION_IN_CELL              |
| GO_ESTABLISHMENT_OF_PROTEIN_LOCALIZATION_TO_ORGANELLE |
| GO_INTRACELLULAR_PROTEIN_TRANSPORT                    |
| GO_CELLULAR_MACROMOLECULE_LOCALIZATION                |
| GO_CELLULAR_CATABOLIC_PROCESS                         |
| GO_NCRNA_PROCESSING                                   |
|                                                       |
|                                                       |

**All Biological processes gene sets**

| NAME                                                      | SIZE | ES       | NES      | NOM p-val   | FDR q-val   | FWER p-val | RANK AT MAX |
|-----------------------------------------------------------|------|----------|----------|-------------|-------------|------------|-------------|
| GO_RIBONUCLEOPROTEIN_COMPLEX_BIOGENESIS                   | 260  | 0.700739 | 2.737249 | 0           | 0           | 0          | 1076        |
| GO_NCRNA_PROCESSING                                       | 222  | 0.694336 | 2.720099 | 0           | 0           | 0          | 1078        |
| GO_RIBOSOME_BIOGENESIS                                    | 211  | 0.704939 | 2.706077 | 0           | 0           | 0          | 1039        |
| GO_TRANSLATIONAL_INITIATION                               | 111  | 0.725213 | 2.683347 | 0           | 0           | 0          | 1103        |
| GO_RRNA_METABOLIC_PROCESS                                 | 176  | 0.702099 | 2.672241 | 0           | 0           | 0          | 1039        |
| GO_NCRNA_METABOLIC_PROCESS                                | 273  | 0.675415 | 2.630119 | 0           | 0           | 0          | 1086        |
| GO_RNA_CATABOLIC_PROCESS                                  | 115  | 0.705351 | 2.620501 | 0           | 0           | 0          | 721         |
| GO_ESTABLISHMENT_OF_PROTEIN_LOCALIZATION_TO_MEMBRANE      | 113  | 0.696814 | 2.585239 | 0           | 0           | 0          | 776         |
| GO_VIRAL_LIFE_CYCLE                                       | 125  | 0.699305 | 2.573847 | 0           | 0           | 0          | 1103        |
| GO_RNA_PROCESSING                                         | 334  | 0.647019 | 2.541204 | 0           | 0           | 0          | 1078        |
| GO_AMIDE_BIOSYNTHETIC_PROCESS                             | 272  | 0.64156  | 2.518846 | 0           | 0           | 0          | 1105        |
| GO_MRNA_METABOLIC_PROCESS                                 | 211  | 0.648444 | 2.51524  | 0           | 0           | 0          | 1076        |
| GO_ESTABLISHMENT_OF_PROTEIN_LOCALIZATION_TO_ORGANELLE     | 154  | 0.666893 | 2.499924 | 0           | 0           | 0          | 995         |
| GO_PROTEIN_TARGETING                                      | 155  | 0.658715 | 2.482041 | 0           | 0           | 0          | 995         |
| GO_PROTEIN_LOCALIZATION_TO_MEMBRANE                       | 139  | 0.656501 | 2.478488 | 0           | 0           | 0          | 744         |
| GO_PEPTIDE_METABOLIC_PROCESS                              | 281  | 0.628779 | 2.471736 | 0           | 0           | 0          | 1443        |
| GO_ORGANIC_CYCLIC_COMPOUND_CATABOLIC_PROCESS              | 163  | 0.643379 | 2.44473  | 0           | 0           | 0          | 721         |
| GO_CELLULAR_AMIDE_METABOLIC_PROCESS                       | 324  | 0.609392 | 2.421287 | 0           | 0           | 0          | 1105        |
| GO_PROTEIN_LOCALIZATION_TO_ORGANELLE                      | 184  | 0.633714 | 2.420716 | 0           | 0           | 0          | 995         |
| GO_CELLULAR_MACROMOLECULAR_COMPLEX_ASSEMBLY               | 240  | 0.613297 | 2.412648 | 0           | 0           | 0          | 992         |
| GO_INTRACELLULAR_PROTEIN_TRANSPORT                        | 208  | 0.612972 | 2.36054  | 0           | 0           | 0          | 995         |
| GO_SYMBIOSIS_ENCOMPASSING_MUTUALISM_THROUGH_PARASITISM    | 229  | 0.591008 | 2.309102 | 0           | 0           | 0          | 996         |
| GO_ORGANONITROGEN_COMPOUND_BIOSYNTHETIC_PROCESS           | 416  | 0.576952 | 2.299449 | 0           | 0           | 0          | 1109        |
| GO_INTERSPECIES_INTERACTION_BETWEEN_ORGANISMS             | 229  | 0.591008 | 2.280414 | 0           | 0           | 0          | 996         |
| GO_MITOCHONDRION_ORGANIZATION                             | 227  | 0.575594 | 2.243709 | 0           | 0           | 0          | 1512        |
| GO_MACROMOLECULE_CATABOLIC_PROCESS                        | 259  | 0.572306 | 2.240818 | 0           | 0           | 0          | 1299        |
| GO_DNA_CONFORMATION_CHANGE                                | 102  | 0.61413  | 2.217435 | 0           | 0           | 0          | 934         |
| GO_SINGLE_ORGANISM_CELLULAR_LOCALIZATION                  | 239  | 0.563018 | 2.197163 | 0           | 0           | 0          | 995         |
| GO_MEMBRANE_ORGANIZATION                                  | 229  | 0.559927 | 2.182152 | 0           | 0           | 0          | 1045        |
| GO_CELLULAR_MACROMOLECULE_LOCALIZATION                    | 297  | 0.550696 | 2.178533 | 0           | 0           | 0          | 995         |
| GO_GENERATION_OF_PRECURSOR_METABOLITES_AND_ENERGY         | 104  | 0.591068 | 2.171674 | 0           | 0           | 0          | 888         |
| GO_NUCLEOSIDE_MONOPHOSPHATE_METABOLIC_PROCESS             | 100  | 0.597056 | 2.163501 | 0           | 0           | 0          | 896         |
| GO_GLYCOSYL_COMPOUND_METABOLIC_PROCESS                    | 124  | 0.57495  | 2.153712 | 0           | 0           | 0          | 926         |
| GO_ESTABLISHMENT_OF_PROTEIN_LOCALIZATION                  | 299  | 0.544923 | 2.134327 | 0           | 0           | 0          | 995         |
| GO_POSTTRANSCRIPTIONAL_REGULATION_OF_GENE_EXPRESSION      | 146  | 0.560846 | 2.125737 | 0           | 0           | 0          | 1360        |
| GO_CELLULAR_CATABOLIC_PROCESS                             | 367  | 0.53076  | 2.114962 | 0           | 0           | 0          | 1107        |
| GO_ESTABLISHMENT_OF_LOCALIZATION_IN_CELL                  | 399  | 0.528122 | 2.114405 | 0           | 0           | 0          | 982         |
| GO_MACROMOLECULAR_COMPLEX_ASSEMBLY                        | 385  | 0.531843 | 2.106329 | 0           | 0           | 0          | 992         |
| GO_CATABOLIC_PROCESS                                      | 459  | 0.506621 | 2.015824 | 0           | 0           | 0          | 1107        |
| GO_MRNA_PROCESSING                                        | 113  | 0.547266 | 2.006617 | 0           | 0           | 0          | 1214        |
| GO_PURINE_CONTAINING_COMPOUND_METABOLIC_PROCESS           | 136  | 0.533903 | 1.998855 | 0           | 0           | 0          | 1325        |
| GO_DNA_REPAIR                                             | 122  | 0.540229 | 1.996982 | 0           | 0           | 0          | 1604        |
| GO_PROTEIN_LOCALIZATION                                   | 378  | 0.501173 | 1.983834 | 0           | 0           | 0          | 982         |
| GO_COFACTOR_METABOLIC_PROCESS                             | 108  | 0.544738 | 1.979087 | 0           | 0           | 0          | 838         |
| GO_CHROMOSOME_ORGANIZATION                                | 275  | 0.505148 | 1.966823 | 0           | 0           | 0          | 1300        |
| GO_REGULATION_OF_CELLULAR_AMIDE_METABOLIC_PROCESS         | 101  | 0.533321 | 1.951424 | 0           | 0           | 0          | 1097        |
| GO_NUCLEOBASE_CONTAINING_SMALL_MOLECULE_METABOLIC_PROCESS | 181  | 0.504227 | 1.942229 | 0           | 0           | 0          | 1556        |
| GO_CELLULAR_RESPONSE_TO_DNA_DAMAGE_STIMULUS               | 178  | 0.50189  | 1.913103 | 0           | 0           | 0          | 1671        |
| GO_CHROMATIN_ORGANIZATION                                 | 161  | 0.503367 | 1.902382 | 0           | 0           | 0          | 1284        |
| GO_ORGANELLE_ASSEMBLY                                     | 124  | 0.506962 | 1.869319 | 0           | 1.58E-05    | 0.001      | 687         |
| GO_CELLULAR_AMINO_ACID_METABOLIC_PROCESS                  | 117  | 0.504806 | 1.867412 | 0           | 1.55E-05    | 0.001      | 1899        |
| GO_PROTEIN_COMPLEX_BIOGENESIS                             | 281  | 0.473782 | 1.863393 | 0           | 1.52E-05    | 0.001      | 1205        |
| GO_PROTEIN_COMPLEX_ASSEMBLY                               | 281  | 0.473782 | 1.862466 | 0           | 1.49E-05    | 0.001      | 1205        |
| GO_SINGLE_ORGANISM_BIOSYNTHETIC_PROCESS                   | 396  | 0.466962 | 1.859662 | 0           | 1.47E-05    | 0.001      | 1593        |
| GO_PROTEIN_COMPLEX_SUBUNIT_ORGANIZATION                   | 408  | 0.466292 | 1.853259 | 0           | 1.44E-05    | 0.001      | 1305        |
| GO_DNA_METABOLIC_PROCESS                                  | 218  | 0.478986 | 1.850817 | 0           | 1.41E-05    | 0.001      | 1671        |
| GO_MITOTIC_CELL_CYCLE                                     | 231  | 0.469622 | 1.84132  | 0           | 1.39E-05    | 0.001      | 1907        |
| GO_CELLULAR_COMPONENT_DISASSEMBLY                         | 164  | 0.475705 | 1.81459  | 0           | 1.37E-05    | 0.001      | 1476        |
| GO_OXIDATION_REDUCTION_PROCESS                            | 262  | 0.458463 | 1.786043 | 0           | 5.35E-05    | 0.004      | 1557        |
| GO_MITOTIC_NUCLEAR_DIVISION                               | 106  | 0.485565 | 1.768706 | 0.001104972 | 5.26E-05    | 0.004      | 1652        |
| GO_REGULATION_OF_MITOTIC_CELL_CYCLE                       | 135  | 0.471991 | 1.751266 | 0           | 1.17E-04    | 0.009      | 785         |
| GO_ORGANOPHOSPHATE_METABOLIC_PROCESS                      | 242  | 0.442006 | 1.728894 | 0           | 1.66E-04    | 0.013      | 1244        |
| GO_CARBOHYDRATE_DERIVATIVE_METABOLIC_PROCESS              | 266  | 0.436132 | 1.703204 | 0           | 2.91E-04    | 0.023      | 1112        |
| GO_CARBOHYDRATE_METABOLIC_PROCESS                         | 153  | 0.445745 | 1.695123 | 0           | 3.37E-04    | 0.027      | 1070        |
| GO_CELL_CYCLE_PROCESS                                     | 311  | 0.428204 | 1.677464 | 0           | 5.00E-04    | 0.04       | 1907        |
| GO_SMALL_MOLECULE_BIOSYNTHETIC_PROCESS                    | 125  | 0.453633 | 1.673245 | 0           | 5.29E-04    | 0.043      | 1290        |
| GO_REGULATION_OF_CELL_CYCLE_PHASE_TRANSITION              | 101  | 0.456878 | 1.666017 | 0           | 5.80E-04    | 0.048      | 996         |
| GO_ORGANIC_ACID_METABOLIC_PROCESS                         | 274  | 0.420348 | 1.651029 | 0           | 7.69E-04    | 0.064      | 1343        |
| GO_POSITIVE_REGULATION_OF_PROTEOLYSIS                     | 103  | 0.44511  | 1.642445 | 0.002234637 | 9.75E-04    | 0.082      | 1299        |
| GO_NEGATIVE_REGULATION_OF_ORGANELLE_ORGANIZATION          | 100  | 0.451928 | 1.626904 | 0.001123596 | 0.001199278 | 0.101      | 1561        |

|                                                                 |     |          |          |             |             |       |      |
|-----------------------------------------------------------------|-----|----------|----------|-------------|-------------|-------|------|
| GO_ORGANELLE_FISSION                                            | 134 | 0.43191  | 1.623668 | 0.001069519 | 0.001249561 | 0.105 | 1907 |
| GO_CELL_CYCLE                                                   | 367 | 0.408626 | 1.623132 | 0           | 0.00125421  | 0.107 | 1907 |
| GO_PROTEIN_CATABOLIC_PROCESS                                    | 121 | 0.435657 | 1.606525 | 0           | 0.001593909 | 0.135 | 1299 |
| GO_PROTEIN_MODIFICATION_BY_SMALL_PROTEIN_CONJUGATION_OR_REMOVAL | 161 | 0.419507 | 1.595882 | 0.002107482 | 0.001819631 | 0.153 | 996  |
| GO_CELL_DIVISION                                                | 130 | 0.416515 | 1.575546 | 0.00109529  | 0.002566212 | 0.212 | 1652 |
| GO_REGULATION_OF_DEFENSE_RESPONSE                               | 178 | 0.410437 | 1.574849 | 0.002079002 | 0.002574058 | 0.214 | 1157 |
| GO_PROTEIN_UBIQUITINATION                                       | 120 | 0.425096 | 1.572585 | 0.003282276 | 0.00264328  | 0.221 | 996  |
| GO_REGULATION_OF_CELL_CYCLE_PROCESS                             | 154 | 0.41452  | 1.569128 | 0           | 0.002741294 | 0.233 | 1649 |
| GO_PROTEIN_OLIGOMERIZATION                                      | 102 | 0.423146 | 1.562743 | 0.006779661 | 0.003136027 | 0.267 | 921  |
| GO_NEGATIVE_REGULATION_OF_CELL_CYCLE                            | 114 | 0.422311 | 1.554896 | 0.003271538 | 0.003601891 | 0.304 | 1024 |
| GO_CELLULAR_RESPONSE_TO_STRESS                                  | 389 | 0.385856 | 1.547704 | 0           | 0.004055385 | 0.338 | 1515 |
| GO_REGULATION_OF_HOMEOSTATIC_PROCESS                            | 102 | 0.422212 | 1.540451 | 0.003333333 | 0.004545215 | 0.372 | 1107 |
| GO_SINGLE_ORGANISM_CATABOLIC_PROCESS                            | 224 | 0.392652 | 1.532081 | 0.002042901 | 0.005091365 | 0.417 | 1095 |
| GO_CARBOHYDRATE_DERIVATIVE_BIOSYNTHETIC_PROCESS                 | 141 | 0.407704 | 1.524744 | 0.004352557 | 0.005585711 | 0.449 | 1109 |
| GO_POSITIVE_REGULATION_OF_IMMUNE_RESPONSE                       | 115 | 0.405638 | 1.505958 | 0.006571741 | 0.007295628 | 0.544 | 1121 |
| GO_REGULATION_OF_PROTEOLYSIS                                    | 178 | 0.3932   | 1.504369 | 0.001058201 | 0.00740411  | 0.557 | 1569 |
| GO_REGULATION_OF_CELL_CYCLE                                     | 257 | 0.3858   | 1.502305 | 0.001021451 | 0.00752578  | 0.564 | 801  |
| GO_NITROGEN_COMPOUND_TRANSPORT                                  | 125 | 0.402294 | 1.501637 | 0.004347826 | 0.007525287 | 0.57  | 1607 |
| GO_TRANSMEMBRANE_TRANSPORT                                      | 267 | 0.380186 | 1.490516 | 0           | 0.009019404 | 0.642 | 1462 |
| GO_PHOSPHORYLATION                                              | 309 | 0.374699 | 1.481035 | 0           | 0.010484532 | 0.709 | 1189 |
| GO_REGULATION_OF_ORGANELLE_ORGANIZATION                         | 267 | 0.376271 | 1.479554 | 0           | 0.010508183 | 0.716 | 1502 |
| GO_REGULATION_OF_MULTI_ORGANISM_PROCESS                         | 111 | 0.403196 | 1.478487 | 0.007650273 | 0.010479307 | 0.72  | 1157 |
| GO_CHROMATIN_MODIFICATION                                       | 113 | 0.399877 | 1.467941 | 0.009814613 | 0.011989916 | 0.768 | 1284 |
| GO_RESPONSE_TO_BIOTIC_STIMULUS                                  | 198 | 0.382099 | 1.467080 | 0.004132231 | 0.012056059 | 0.772 | 737  |
| GO_PHOSPHATE_CONTAINING_COMPOUND_METABOLIC_PROCESS              | 495 | 0.366656 | 1.466789 | 0           | 0.011954261 | 0.772 | 1302 |
| GO_ORGANOPHOSPHATE_BIOSYNTHETIC_PROCESS                         | 119 | 0.395591 | 1.461109 | 0.01191766  | 0.012850282 | 0.798 | 1325 |
| GO_POSITIVE_REGULATION_OF_ORGANELLE_ORGANIZATION                | 137 | 0.38812  | 1.454418 | 0.009615385 | 0.014086581 | 0.833 | 733  |
| GO_REGULATION_OF_CATABOLIC_PROCESS                              | 166 | 0.379629 | 1.448762 | 0.007352941 | 0.015224588 | 0.857 | 1272 |
| GO_HOMEOSTATIC_PROCESS                                          | 296 | 0.364691 | 1.446102 | 0.003033367 | 0.015678735 | 0.873 | 1361 |
| GO_MONOVALENT_INORGANIC_CATION_TRANSPORT                        | 104 | 0.389211 | 1.429351 | 0.01664817  | 0.019286709 | 0.915 | 888  |
| GO_MONOCARBOXYLIC_ACID_METABOLIC_PROCESS                        | 121 | 0.382893 | 1.41437  | 0.017316017 | 0.023713283 | 0.954 | 1314 |
| GO_RESPONSE_TO_CYTOKINE                                         | 167 | 0.369178 | 1.404393 | 0.017875921 | 0.026875915 | 0.973 | 996  |
| GO_CELLULAR_RESPONSE_TO_CYTOKINE_STIMULUS                       | 146 | 0.370768 | 1.392125 | 0.021321962 | 0.031344105 | 0.983 | 996  |
| GO_ION_TRANSMEMBRANE_TRANSPORT                                  | 191 | 0.360566 | 1.388514 | 0.009365245 | 0.0325544   | 0.987 | 1462 |
| GO_REGULATION_OF_RESPONSE_TO_STRESS                             | 332 | 0.347386 | 1.38637  | 0.00404449  | 0.03335894  | 0.988 | 1166 |
| GO_CATION_TRANSPORT                                             | 173 | 0.353819 | 1.359822 | 0.027139874 | 0.046310864 | 0.998 | 1377 |
| GO_POSITIVE_REGULATION_OF_ESTABLISHMENT_OF_PROTEIN_LOCALIZATION | 108 | 0.371296 | 1.346955 | 0.039955605 | 0.053550836 | 1     | 965  |
| GO_MICROTUBULE_BASED_PROCESS                                    | 106 | 0.367482 | 1.342327 | 0.057483733 | 0.056242466 | 1     | 1389 |
| GO_DEFENSE_RESPONSE_TO_OTHER_ORGANISM                           | 119 | 0.365305 | 1.341241 | 0.04535637  | 0.056480832 | 1     | 863  |
| GO_REGULATION_OF_CELLULAR_PROTEIN_LOCALIZATION                  | 121 | 0.359584 | 1.328656 | 0.04408602  | 0.06505669  | 1     | 939  |
| GO_DEFENSE_RESPONSE                                             | 249 | 0.33736  | 1.323887 | 0.01724138  | 0.067682944 | 1     | 1343 |
| GO_REGULATION_OF_PEPTIDASE_ACTIVITY                             | 101 | 0.359894 | 1.32094  | 0.05574136  | 0.069483995 | 1     | 1556 |
| GO_CELLULAR_HOMEOSTASIS                                         | 139 | 0.353746 | 1.31739  | 0.057446808 | 0.07169836  | 1     | 1513 |
| GO_CELL_DEATH                                                   | 234 | 0.336734 | 1.315429 | 0.02639594  | 0.07265542  | 1     | 1561 |
| GO_INORGANIC_ION_TRANSMEMBRANE_TRANSPORT                        | 132 | 0.358517 | 1.313283 | 0.046637744 | 0.07378419  | 1     | 888  |
| GO_CHEMICAL_HOMEOSTASIS                                         | 176 | 0.339943 | 1.310923 | 0.043704476 | 0.07522082  | 1     | 1354 |
| GO_NEGATIVE_REGULATION_OF_PROTEIN_MODIFICATION_PROCESS          | 155 | 0.347388 | 1.310244 | 0.040837698 | 0.07510612  | 1     | 1187 |
| GO_NEGATIVE_REGULATION_OF_PROTEIN_METABOLIC_PROCESS             | 255 | 0.335403 | 1.309043 | 0.022403259 | 0.075386904 | 1     | 1499 |
| GO_IMMUNE_SYSTEM_PROCESS                                        | 420 | 0.325813 | 1.298911 | 0.007021063 | 0.083868966 | 1     | 1154 |
| GO_SIGNAL_TRANSDUCTION_BY_PROTEIN_PHOSPHORYLATION               | 101 | 0.355822 | 1.297863 | 0.08379272  | 0.08417071  | 1     | 1015 |
| GO_ION_TRANSPORT                                                | 293 | 0.331202 | 1.294547 | 0.016260162 | 0.08687854  | 1     | 1473 |
| GO_NEGATIVE_REGULATION_OF_CELL_DEATH                            | 225 | 0.329163 | 1.277742 | 0.041025642 | 0.10293648  | 1     | 1272 |
| GO_REGULATION_OF_CYTOPLASMIC_TRANSPORT                          | 101 | 0.348557 | 1.265052 | 0.10421286  | 0.116587386 | 1     | 939  |
| GO_REGULATION_OF_INTRACELLULAR_TRANSPORT                        | 121 | 0.343198 | 1.261864 | 0.09415584  | 0.11957359  | 1     | 939  |
| GO_CYTOKINE_MEDIATED_SIGNALING_PATHWAY                          | 102 | 0.351122 | 1.261234 | 0.1053787   | 0.1194007   | 1     | 996  |
| GO_POSITIVE_REGULATION_OF_IMMUNE_SYSTEM_PROCESS                 | 185 | 0.330325 | 1.261104 | 0.0524109   | 0.118584275 | 1     | 1130 |
| GO_RESPONSE_TO_DRUG                                             | 111 | 0.344848 | 1.253468 | 0.11231101  | 0.12699348  | 1     | 1177 |
| GO_REGULATION_OF_CELLULAR_RESPONSE_TO_STRESS                    | 154 | 0.333336 | 1.253011 | 0.09243698  | 0.12655847  | 1     | 1515 |
| GO_REGULATION_OF_IMMUNE_RESPONSE                                | 162 | 0.325087 | 1.242373 | 0.096092924 | 0.1399274   | 1     | 1270 |
| GO_ION_HOMEOSTASIS                                              | 115 | 0.339907 | 1.23522  | 0.12864865  | 0.1492586   | 1     | 1473 |
| GO_REGULATION_OF_IMMUNE_SYSTEM_PROCESS                          | 296 | 0.316714 | 1.23385  | 0.05995935  | 0.15014121  | 1     | 1157 |
| GO_PROTEOLYSIS                                                  | 252 | 0.31435  | 1.23264  | 0.068297654 | 0.1499738   | 1     | 1299 |
| GO_CELLULAR_CHEMICAL_HOMEOSTASIS                                | 108 | 0.335424 | 1.22937  | 0.1254162   | 0.15461284  | 1     | 1513 |
| GO_PEPTIDYL_AMINO_ACID_MODIFICATION                             | 186 | 0.317703 | 1.212881 | 0.0966736   | 0.17964083  | 1     | 1532 |
| GO_CELLULAR_RESPONSE_TO_ORGANIC_SUBSTANCE                       | 424 | 0.301356 | 1.196669 | 0.063253015 | 0.20678161  | 1     | 970  |
| GO_REGULATION_OF_RESPONSE_TO_EXTERNAL_STIMULUS                  | 191 | 0.310576 | 1.195469 | 0.122384936 | 0.20748806  | 1     | 1166 |
| GO_NEGATIVE_REGULATION_OF_GENE_EXPRESSION                       | 329 | 0.301056 | 1.195365 | 0.0755287   | 0.20619245  | 1     | 1107 |
| GO_REGULATION_OF_CELL_DEATH                                     | 346 | 0.299389 | 1.184476 | 0.09889001  | 0.22557256  | 1     | 1501 |
| GO_POSITIVE_REGULATION_OF_CELLULAR_COMPONENT_ORGANIZATION       | 246 | 0.297572 | 1.167651 | 0.1459404   | 0.25803167  | 1     | 733  |
| GO_POSITIVE_REGULATION_OF_PROTEIN_METABOLIC_PROCESS             | 339 | 0.294047 | 1.166703 | 0.10574018  | 0.25825763  | 1     | 1272 |
| GO_SECRETION                                                    | 109 | 0.314946 | 1.157935 | 0.21492206  | 0.2756556   | 1     | 1214 |
| GO_NEGATIVE_REGULATION_OF_NITROGEN_COMPOUND_METABOLIC_PROCESS   | 327 | 0.28565  | 1.139606 | 0.15704153  | 0.31649077  | 1     | 1092 |
| GO_POSITIVE_REGULATION_OF_PROTEIN_MODIFICATION_PROCESS          | 258 | 0.287045 | 1.122534 | 0.22312373  | 0.3572759   | 1     | 1249 |
| GO_REGULATION_OF_PROTEIN_LOCALIZATION                           | 194 | 0.290528 | 1.118301 | 0.25420168  | 0.3660635   | 1     | 965  |
| GO_NEGATIVE_REGULATION_OF_CATALYTIC_ACTIVITY                    | 194 | 0.287101 | 1.115842 | 0.25129804  | 0.3699083   | 1     | 1174 |
| GO_NEGATIVE_REGULATION_OF_CELLULAR_COMPONENT_ORGANIZATION       | 150 | 0.292268 | 1.112185 | 0.25638297  | 0.3773165   | 1     | 1473 |
| GO_POSITIVE_REGULATION_OF_CELL_DEATH                            | 131 | 0.297123 | 1.107578 | 0.27105832  | 0.38700664  | 1     | 709  |
| GO_IMMUNE_RESPONSE                                              | 205 | 0.288668 | 1.105191 | 0.24896695  | 0.39079678  | 1     | 970  |
| GO_POSITIVE_REGULATION_OF_TRANSFERASE_ACTIVITY                  | 161 | 0.289461 | 1.101189 | 0.2857143   | 0.39852563  | 1     | 1342 |
| GO_MULTI_ORGANISM_REPRODUCTIVE_PROCESS                          | 172 | 0.289392 | 1.094896 | 0.3018066   | 0.41364473  | 1     | 1238 |
| GO_INNATE_IMMUNE_RESPONSE                                       | 121 | 0.295081 | 1.082609 | 0.35455543  | 0.44649518  | 1     | 952  |
| GO_POSITIVE_REGULATION_OF_GENE_EXPRESSION                       | 373 | 0.274299 | 1.080267 | 0.2765531   | 0.4501328   | 1     | 1187 |
| GO_REGULATION_OF_BODY_FLUID_LEVELS                              | 111 | 0.29042  | 1.071598 | 0.37045205  | 0.47177187  | 1     | 1242 |
| GO_REGULATION_OF_GROWTH                                         | 127 | 0.283979 | 1.062307 | 0.3664865   | 0.49560177  | 1     | 709  |
| GO_RESPONSE_TO_EXTERNAL_STIMULUS                                | 389 | 0.262363 | 1.039161 | 0.3929648   | 0.56100374  | 1     | 1354 |
| GO_NEGATIVE_REGULATION_OF_CELL_COMMUNICATION                    | 276 | 0.265286 | 1.035444 | 0.38735983  | 0.5689398   | 1     | 1280 |
| GO_NEGATIVE_REGULATION_OF_RESPONSE_TO_STIMULUS                  | 304 | 0.261841 | 1.035361 | 0.3892821   | 0.56557316  | 1     | 1270 |
| GO_REGULATION_OF_TRANSFERASE_ACTIVITY                           | 228 | 0.264253 | 1.030675 | 0.41188523  | 0.5761304   | 1     | 1145 |
| GO_POSITIVE_REGULATION_OF_TRANSPORT                             | 179 | 0.266834 | 1.019907 | 0.45089757  | 0.60575503  | 1     | 846  |
| GO_POSITIVE_REGULATION_OF_BIOSYNTHETIC_PROCESS                  | 374 | 0.253106 | 0.997927 | 0.49898785  | 0.67011005  | 1     | 1276 |
| GO_RESPONSE_TO_HORMONE                                          | 212 | 0.255684 | 0.996171 | 0.5         | 0.67104274  | 1     | 1272 |
| GO_REGULATION_OF_CELLULAR_LOCALIZATION                          | 251 | 0.256283 | 0.991516 | 0.5274949   | 0.6813301   | 1     | 1280 |
| GO_PROTEIN_PHOSPHORYLATION                                      | 221 | 0.2552   | 0.991358 | 0.50988555  | 0.6776075   | 1     | 1186 |
| GO_REGULATION_OF_CYTOSKELETON_ORGANIZATION                      | 108 | 0.273047 | 0.98461  | 0.5065076   | 0.6941721   | 1     | 1467 |
| GO_RESPONSE_TO_OXYGEN_CONTAINING_COMPOUND                       | 315 | 0.246968 | 0.97907  | 0.55959594  | 0.70700943  | 1     | 1272 |
| GO_SEXUAL_REPRODUCTION                                          | 134 | 0.262011 | 0.976953 | 0.5210356   | 0.70900494  | 1     | 1300 |

|                                                                         |     |          |          |             |             |       |      |
|-------------------------------------------------------------------------|-----|----------|----------|-------------|-------------|-------|------|
| GO_RESPONSE_TO_ENDOGENOUS_STIMULUS                                      | 332 | 0.246932 | 0.975596 | 0.5646465   | 0.7087918   | 1     | 1272 |
| GO_CELL_PROLIFERATION                                                   | 198 | 0.253359 | 0.974211 | 0.56666666  | 0.70873874  | 1     | 1361 |
| GO_METAL_ION_TRANSPORT                                                  | 112 | 0.264471 | 0.9737   | 0.5358324   | 0.706019    | 1     | 1377 |
| GO_CELLULAR_RESPONSE_TO_HORMONE_STIMULUS                                | 124 | 0.257597 | 0.969056 | 0.5465368   | 0.7153831   | 1     | 845  |
| GO_NEGATIVE_REGULATION_OF_MOLECULAR_FUNCTION                            | 243 | 0.247999 | 0.968731 | 0.5746653   | 0.71211493  | 1     | 1174 |
| GO_REGULATION_OF_PROTEIN_MODIFICATION_PROCESS                           | 379 | 0.242814 | 0.961524 | 0.6002014   | 0.72875494  | 1     | 1187 |
| GO_REPRODUCTION                                                         | 285 | 0.243622 | 0.957681 | 0.6125126   | 0.73539054  | 1     | 1195 |
| GO_REGULATION_OF_CYTOKINE_PRODUCTION                                    | 113 | 0.258255 | 0.957477 | 0.55969334  | 0.73176396  | 1     | 736  |
| GO_ANION_TRANSPORT                                                      | 124 | 0.257381 | 0.949585 | 0.58502674  | 0.74912953  | 1     | 1689 |
| GO_POSITIVE_REGULATION_OF_CATALYTIC_ACTIVITY                            | 322 | 0.232912 | 0.925661 | 0.6936299   | 0.8097486   | 1     | 1362 |
| GO_CELLULAR_RESPONSE_TO_ENDOGENOUS_STIMULUS                             | 228 | 0.241005 | 0.925474 | 0.6819572   | 0.80574     | 1     | 845  |
| GO_WOUND_HEALING                                                        | 101 | 0.253794 | 0.913411 | 0.6431718   | 0.8320983   | 1     | 1268 |
| GO_RESPONSE_TO_LIPID                                                    | 199 | 0.234005 | 0.909417 | 0.7016632   | 0.83757323  | 1     | 1341 |
| GO_RESPONSE_TO_GROWTH_FACTOR                                            | 113 | 0.24756  | 0.906966 | 0.6596685   | 0.8391173   | 1     | 1173 |
| GO_POSITIVE_REGULATION_OF_CELL_COMMUNICATION                            | 321 | 0.228948 | 0.90607  | 0.7376388   | 0.8364424   | 1     | 1345 |
| GO_REGULATION_OF_CELL_PROLIFERATION                                     | 329 | 0.230002 | 0.903242 | 0.76649743  | 0.8385158   | 1     | 1173 |
| GO_RESPONSE_TO ABIOTIC STIMULUS                                         | 245 | 0.230103 | 0.897766 | 0.7336066   | 0.8469076   | 1     | 1662 |
| GO_INTRACELLULAR_SIGNAL_TRANSDUCTION                                    | 331 | 0.227579 | 0.897463 | 0.7543147   | 0.84294486  | 1     | 1272 |
| GO_ORGANIC_HYDROXY_COMPOUND_METABOLIC_PROCESS                           | 115 | 0.244582 | 0.897008 | 0.67099565  | 0.83946145  | 1     | 1090 |
| GO_NEGATIVE_REGULATION_OF_CELL_PROLIFERATION                            | 143 | 0.237784 | 0.892033 | 0.7009646   | 0.846208    | 1     | 574  |
| GO_POSITIVE_REGULATION_OF_MOLECULAR_FUNCTION                            | 381 | 0.221752 | 0.884576 | 0.8062249   | 0.8581251   | 1     | 1362 |
| GO_POSITIVE_REGULATION_OF_RESPONSE_TO_STIMULUS                          | 387 | 0.221113 | 0.883995 | 0.81287724  | 0.8548515   | 1     | 1345 |
| GO_MULTICELLULAR_ORGANISM_REPRODUCTION                                  | 140 | 0.236246 | 0.882211 | 0.71905273  | 0.85446286  | 1     | 1300 |
| GO_RESPONSE_TO_INORGANIC_SUBSTANCE                                      | 128 | 0.236526 | 0.880977 | 0.70354456  | 0.8528318   | 1     | 1655 |
| GO_REGULATION_OF_SYSTEM_PROCESS                                         | 100 | 0.243226 | 0.87594  | 0.73245615  | 0.85895944  | 1     | 709  |
| GO_RESPONSE_TO_NITROGEN_COMPOUND                                        | 192 | 0.225949 | 0.870927 | 0.771134    | 0.86478573  | 1     | 1341 |
| GO_CELLULAR_RESPONSE_TO_OXYGEN_CONTAINING_COMPOUND                      | 173 | 0.225161 | 0.858326 | 0.7989474   | 0.88489217  | 1     | 1242 |
| GO_EMBRYO_DEVELOPMENT                                                   | 205 | 0.221189 | 0.85377  | 0.803719    | 0.88890034  | 1     | 634  |
| GO_REGULATION_OF_TRANSPORT                                              | 346 | 0.209082 | 0.824675 | 0.9089069   | 0.93560725  | 1     | 846  |
| GO_BEHAVIOR                                                             | 100 | 0.226411 | 0.822019 | 0.8008801   | 0.9350677   | 1     | 1224 |
| GO_RESPONSE_TO_ORGANIC_CYCLIC_COMPOUND                                  | 209 | 0.21096  | 0.812163 | 0.8661088   | 0.9458395   | 1     | 1341 |
| GO_CYTOSKELETON_ORGANIZATION                                            | 178 | 0.212853 | 0.809559 | 0.8793651   | 0.945124    | 1     | 1389 |
| GO_IMMUNE_SYSTEM_DEVELOPMENT                                            | 144 | 0.212144 | 0.805255 | 0.85287845  | 0.94673455  | 1     | 1145 |
| GO_RESPONSE_TO_WOUNDING                                                 | 120 | 0.217228 | 0.802322 | 0.85927504  | 0.9457917   | 1     | 1268 |
| GO_POSITIVE_REGULATION_OF_CELL_PROLIFERATION                            | 184 | 0.204241 | 0.787808 | 0.8960499   | 0.96087146  | 1     | 1287 |
| GO_NEGATIVE_REGULATION_OF_PHOSPHATE_METABOLIC_PROCESS                   | 109 | 0.209041 | 0.772312 | 0.8659341   | 0.9752525   | 1     | 879  |
| GO_NEUROLOGICAL_SYSTEM_PROCESS                                          | 136 | 0.205576 | 0.767835 | 0.897937    | 0.97550917  | 1     | 1174 |
| GO_REGULATION_OF_INTRACELLULAR_SIGNAL_TRANSDUCTION                      | 333 | 0.193953 | 0.763329 | 0.9575329   | 0.9756531   | 1     | 1361 |
| GO_CELLULAR_RESPONSE_TO_ORGANIC_CYCLIC_COMPOUND                         | 105 | 0.210154 | 0.760895 | 0.88606197  | 0.9736517   | 1     | 942  |
| GO_CELLULAR_RESPONSE_TO_NITROGEN_COMPOUND                               | 110 | 0.205213 | 0.760706 | 0.8785558   | 0.969125    | 1     | 847  |
| GO_NEGATIVE_REGULATION_OF_PHOSPHORUS_METABOLIC_PROCESS                  | 109 | 0.209041 | 0.756329 | 0.8952063   | 0.9687748   | 1     | 879  |
| GO_CELLULAR_RESPONSE_TO_LIPID                                           | 102 | 0.206975 | 0.754899 | 0.9101996   | 0.9655003   | 1     | 1224 |
| GO_IMMUNE_EFFECTOR_PROCESS                                              | 100 | 0.205886 | 0.745272 | 0.9029444   | 0.9700193   | 1     | 1281 |
| GO_LIPID_METABOLIC_PROCESS                                              | 232 | 0.191797 | 0.74479  | 0.9460834   | 0.96580386  | 1     | 1197 |
| GO_RESPONSE_TO_STEROID_HORMONE                                          | 120 | 0.19838  | 0.73688  | 0.92373794  | 0.9681935   | 1     | 1409 |
| GO_REGULATION_OF_MAPK_CASCADE                                           | 137 | 0.19502  | 0.724988 | 0.92432433  | 0.9726859   | 1     | 1361 |
| GO_REGULATION_OF_PHOSPHORUS_METABOLIC_PROCESS                           | 337 | 0.184707 | 0.724562 | 0.9838872   | 0.9683942   | 1     | 1182 |
| GO_EMBRYO_DEVELOPMENT_ENDING_IN_BIRTH_OR_EGG_HATCHING                   | 145 | 0.189491 | 0.704492 | 0.952739    | 0.9771611   | 1     | 634  |
| GO_CELLULAR_LIPID_METABOLIC_PROCESS                                     | 183 | 0.182892 | 0.702946 | 0.97196263  | 0.97347194  | 1     | 1197 |
| GO_HEAD_DEVELOPMENT                                                     | 151 | 0.172531 | 0.649194 | 0.9818182   | 0.99159676  | 1     | 1340 |
| GO_LIPID_BIOSYNTHETIC_PROCESS                                           | 117 | 0.169936 | 0.628625 | 0.98468274  | 0.9918613   | 1     | 1290 |
| GO_CELL_MORPHOGENESIS_INVOLVED_IN_DIFFERENTIATION                       | 114 | -0.39413 | -1.86522 | 0           | 0           | 0     | 1696 |
| GO_HEART_DEVELOPMENT                                                    | 112 | -0.35967 | -1.75831 | 0           | 0           | 0     | 771  |
| GO_REGULATION_OF_NERVOUS_SYSTEM_DEVELOPMENT                             | 150 | -0.33563 | -1.75734 | 0           | 0           | 0     | 788  |
| GO_MUSCLE_STRUCTURE_DEVELOPMENT                                         | 103 | -0.37071 | -1.72988 | 0           | 0           | 0     | 1191 |
| GO_NEURON_DEVELOPMENT                                                   | 120 | -0.34606 | -1.70953 | 0           | 0           | 0     | 801  |
| GO_CELL_CELL_ADHESION                                                   | 163 | -0.33279 | -1.69985 | 0           | 9.23E-04    | 0.001 | 1107 |
| GO_VASCULATURE_DEVELOPMENT                                              | 122 | -0.33863 | -1.67224 | 0           | 0.003154845 | 0.004 | 1161 |
| GO_REGULATION_OF_CELL_DEVELOPMENT                                       | 172 | -0.318   | -1.64039 | 0           | 0.00276049  | 0.004 | 1423 |
| GO_CELLULAR_COMPONENT_MORPHOGENESIS                                     | 180 | -0.32456 | -1.63927 | 0           | 0.002453768 | 0.004 | 837  |
| GO_CIRCULATORY_SYSTEM_DEVELOPMENT                                       | 197 | -0.30897 | -1.62311 | 0           | 0.002208391 | 0.004 | 1110 |
| GO_CARDIOVASCULAR_SYSTEM_DEVELOPMENT                                    | 197 | -0.30897 | -1.60704 | 0           | 0.002352126 | 0.005 | 1110 |
| GO_NEGATIVE_REGULATION_OF_DEVELOPMENTAL_PROCESS                         | 161 | -0.31324 | -1.58958 | 0           | 0.002471905 | 0.006 | 788  |
| GO_REGULATION_OF_NEURON_DIFFERENTIATION                                 | 114 | -0.32052 | -1.56534 | 0           | 0.002866374 | 0.008 | 1423 |
| GO_NEGATIVE_REGULATION_OF_CELL_DIFFERENTIATION                          | 127 | -0.31762 | -1.55592 | 0           | 0.002661633 | 0.008 | 788  |
| GO_REGULATION_OF_CELLULAR_COMPONENT_MOVEMENT                            | 168 | -0.29468 | -1.54315 | 0.020408163 | 0.003762033 | 0.012 | 824  |
| GO_NEURON_DIFFERENTIATION                                               | 159 | -0.29377 | -1.53442 | 0           | 0.003826906 | 0.013 | 801  |
| GO_REGULATION_OF_CELL_MORPHOGENESIS                                     | 102 | -0.32329 | -1.52375 | 0.010638298 | 0.004591486 | 0.016 | 1407 |
| GO_CELL_CELL_SIGNALING                                                  | 139 | -0.30815 | -1.51108 | 0           | 0.005577804 | 0.021 | 946  |
| GO_REGULATION_OF_GTPASE_ACTIVITY                                        | 125 | -0.30824 | -1.50903 | 0           | 0.00579947  | 0.023 | 1176 |
| GO_BIOLOGICAL_ADHESION                                                  | 253 | -0.276   | -1.48784 | 0           | 0.008647906 | 0.037 | 961  |
| GO_CELL_DEVELOPMENT                                                     | 288 | -0.27066 | -1.47639 | 0           | 0.009868876 | 0.043 | 777  |
| GO_REGULATION_OF_CELL_DIFFERENTIATION                                   | 306 | -0.26714 | -1.47292 | 0           | 0.009420291 | 0.043 | 818  |
| GO_EPITHELIAL_CELL_DIFFERENTIATION                                      | 107 | -0.30681 | -1.46623 | 0           | 0.009408037 | 0.045 | 1446 |
| GO_TISSUE_MORPHOGENESIS                                                 | 125 | -0.29331 | -1.44316 | 0           | 0.012969665 | 0.062 | 1110 |
| GO_EPITHELIUM_DEVELOPMENT                                               | 218 | -0.26833 | -1.41887 | 0           | 0.018584194 | 0.09  | 776  |
| GO_TUBE_DEVELOPMENT                                                     | 138 | -0.28522 | -1.4107  | 0           | 0.019066188 | 0.097 | 771  |
| GO_CELL_PROJECTION_ORGANIZATION                                         | 149 | -0.28202 | -1.398   | 0.018518519 | 0.021278182 | 0.111 | 917  |
| GO_TISSUE_DEVELOPMENT                                                   | 331 | -0.24354 | -1.39528 | 0           | 0.02075201  | 0.112 | 776  |
| GO_NEUROGENESIS                                                         | 271 | -0.26641 | -1.39385 | 0           | 0.020646794 | 0.114 | 801  |
| GO_CELL_PART_MORPHOGENESIS                                              | 111 | -0.2902  | -1.39219 | 0.009345794 | 0.020423329 | 0.117 | 917  |
| GO_REPRODUCTIVE_SYSTEM_DEVELOPMENT                                      | 114 | -0.27912 | -1.36597 | 0           | 0.027891723 | 0.16  | 966  |
| GO_ORGAN_MORPHOGENESIS                                                  | 186 | -0.26613 | -1.35713 | 0           | 0.030210063 | 0.174 | 1385 |
| GO_REGULATION_OF_CELL_ADHESION                                          | 120 | -0.28505 | -1.34426 | 0.034883723 | 0.033722    | 0.198 | 934  |
| GO_LOCALIZATION_OF_CELL                                                 | 168 | -0.25884 | -1.34284 | 0           | 0.033290338 | 0.201 | 738  |
| GO_POSITIVE_REGULATION_OF_KINASE_ACTIVITY                               | 109 | -0.2731  | -1.34217 | 0.035714287 | 0.032497425 | 0.201 | 760  |
| GO_REGULATION_OF_CELL_PROJECTION_ORGANIZATION                           | 102 | -0.27742 | -1.33359 | 0.027272727 | 0.03334462  | 0.212 | 747  |
| GO_CELL_MOTILITY                                                        | 168 | -0.25884 | -1.31727 | 0.03448276  | 0.038299926 | 0.247 | 738  |
| GO_POSITIVE_REGULATION_OF_CELL_DIFFERENTIATION                          | 173 | -0.25182 | -1.31177 | 0           | 0.039034426 | 0.257 | 925  |
| GO_POSITIVE_REGULATION_OF_DEVELOPMENTAL_PROCESS                         | 247 | -0.24117 | -1.29851 | 0           | 0.044855185 | 0.299 | 771  |
| GO_REGULATION_OF_TRANSCRIPTION_FROM_RNA_POLYMERASE_II_PROMOTER          | 316 | -0.2315  | -1.27543 | 0           | 0.057343837 | 0.38  | 801  |
| GO_LOCOMOTION                                                           | 219 | -0.24907 | -1.27068 | 0.071428575 | 0.059017308 | 0.397 | 738  |
| GO_ANATOMICAL_STRUCTURE_FORMATION_INVOLVED_IN_MORPHOGENESIS             | 218 | -0.23934 | -1.23642 | 0           | 0.08472515  | 0.517 | 875  |
| GO_POSITIVE_REGULATION_OF_TRANSCRIPTION_FROM_RNA_POLYMERASE_II_PROMOTER | 187 | -0.24109 | -1.2297  | 0.06382979  | 0.09027269  | 0.549 | 1065 |
| GO_REGULATION_OF_PROTEIN_SERINE_THREONINE_KINASE_ACTIVITY               | 110 | -0.25377 | -1.22885 | 0.08421053  | 0.08848173  | 0.549 | 840  |
| GO_GROWTH                                                               | 112 | -0.25202 | -1.2126  | 0.078947365 | 0.10327828  | 0.614 | 801  |

|                                                                         |     |          |          |             |             |       |      |
|-------------------------------------------------------------------------|-----|----------|----------|-------------|-------------|-------|------|
| GO_MOVEMENT_OF_CELL_OR_SUBCELLULAR_COMPONENT                            | 249 | -0.22345 | -1.20416 | 0           | 0.111623555 | 0.653 | 738  |
| GO_DEVELOPMENTAL_PROCESS_INVOLVED_IN_REPRODUCTION                       | 148 | -0.2374  | -1.17725 | 0.03773585  | 0.14585681  | 0.759 | 743  |
| GO_EMBRYONIC_MORPHOGENESIS                                              | 108 | -0.24895 | -1.16875 | 0.11764706  | 0.15807666  | 0.792 | 1110 |
| GO_NEGATIVE_REGULATION_OF_TRANSCRIPTION_FROM_RNA_POLYMERASE_II_PROMOTER | 154 | -0.23056 | -1.16295 | 0.05357143  | 0.16557813  | 0.814 | 818  |
| GO_POSITIVE_REGULATION_OF_LOCOMOTION                                    | 100 | -0.2495  | -1.16254 | 0.14130434  | 0.16327631  | 0.816 | 803  |
| GO_REGULATION_OF_ANATOMICAL_STRUCTURE_MORPHOGENESIS                     | 226 | -0.21832 | -1.1455  | 0.029411765 | 0.18969348  | 0.871 | 819  |
| GO_REGULATION_OF_KINASE_ACTIVITY                                        | 173 | -0.21863 | -1.13159 | 0.11627907  | 0.21238305  | 0.902 | 811  |
| GO_TRANSCRIPTION_FROM_RNA_POLYMERASE_II_PROMOTER                        | 136 | -0.22738 | -1.12709 | 0.18421052  | 0.21895537  | 0.913 | 290  |
| GO_REGULATION_OF_SECRETION                                              | 123 | -0.22433 | -1.1117  | 0.25        | 0.24741618  | 0.932 | 559  |
| GO_POSITIVE_REGULATION_OF_PHOSPHORUS_METABOLIC_PROCESS                  | 210 | -0.21555 | -1.10598 | 0.14705883  | 0.25606164  | 0.94  | 771  |
| GO_ENZYME_LINKED_RECEPTOR_PROTEIN_SIGNALING_PATHWAY                     | 151 | -0.21387 | -1.09487 | 0.17142858  | 0.27780008  | 0.956 | 878  |
| GO_NEGATIVE_REGULATION_OF_MULTICELLULAR_ORGANISMAL_PROCESS              | 187 | -0.21135 | -1.09058 | 0.21428572  | 0.28417277  | 0.963 | 361  |
| GO_POSITIVE_REGULATION_OF_PHOSPHATE_METABOLIC_PROCESS                   | 210 | -0.21555 | -1.08534 | 0.21276596  | 0.29372594  | 0.969 | 771  |
| GO_REGULATION_OF_MULTICELLULAR_ORGANISMAL_DEVELOPMENT                   | 361 | -0.19497 | -1.08287 | 0.1         | 0.29523197  | 0.971 | 818  |
| GO_SYSTEM_PROCESS                                                       | 246 | -0.19522 | -1.08173 | 0.2413793   | 0.2927138   | 0.974 | 878  |
| GO_POSITIVE_REGULATION_OF_INTRACELLULAR_SIGNAL_TRANSDUCTION             | 181 | -0.20619 | -1.06573 | 0.3         | 0.33244786  | 0.984 | 760  |
| GO_REGULATION_OF_HYDROLASE_ACTIVITY                                     | 272 | -0.18995 | -1.03223 | 0.25        | 0.43106574  | 0.99  | 516  |
| GO_SKELETAL_SYSTEM_DEVELOPMENT                                          | 102 | -0.21743 | -1.03106 | 0.45360824  | 0.4284399   | 0.99  | 1279 |
| GO_GLAND_DEVELOPMENT                                                    | 110 | -0.21487 | -1.02583 | 0.443038    | 0.43989602  | 0.993 | 925  |
| GO_POSITIVE_REGULATION_OF_MULTICELLULAR_ORGANISMAL_PROCESS              | 293 | -0.18998 | -1.02276 | 0.4117647   | 0.44255456  | 0.994 | 803  |
| GO_REGULATION_OF_ION_TRANSPORT                                          | 115 | -0.19875 | -1.00335 | 0.4945055   | 0.4989454   | 0.999 | 511  |
| GO_VESICLE_MEDIATED_TRANSPORT                                           | 175 | -0.19684 | -0.99765 | 0.4473684   | 0.5092677   | 0.999 | 611  |
| GO_TRANSMEMBRANE_RECEPTOR_PROTEIN_TYROSINE_KINASE_SIGNALING_PATHWAY     | 113 | -0.20067 | -0.98096 | 0.5205479   | 0.5584068   | 1     | 754  |
| GO_REGULATION_OF_CELLULAR_COMPONENT_BIOGENESIS                          | 145 | -0.19242 | -0.96777 | 0.62903225  | 0.6000094   | 1     | 824  |
| GO_POSITIVE_REGULATION_OF_HYDROLASE_ACTIVITY                            | 175 | -0.1755  | -0.88736 | 0.82978725  | 0.8227005   | 1     | 497  |
| GO_CENTRAL_NERVOUS_SYSTEM_DEVELOPMENT                                   | 179 | -0.17213 | -0.88714 | 0.9         | 0.81150895  | 1     | 1385 |
| GO_CELL_ACTIVATION                                                      | 108 | -0.17696 | -0.84237 | 0.9230769   | 0.89131063  | 1     | 803  |

**Supplementary Table S3 – Summary of MYC and Breast cancer GSEA results**

Differentially expressed genes in 10A.PM tumors were analyzed by GSEA using MYC and breast cancer gene sets.

| MYC GENE SETS                               |      |        |           |             |
|---------------------------------------------|------|--------|-----------|-------------|
| NAME                                        | SIZE | NES    | FDR q-val | RANK AT MAX |
| BILD_MYC_ONCOGENIC_SIGNATURE                | 117  | 1.927  | 0.000     | 1505        |
| CACGTG_V\$MYC_Q2                            | 287  | 2.032  | 0.000     | 1490        |
| COLLER_MYC_TARGETS_UP                       | 22   | 1.986  | 0.000     | 1117        |
| COLLER_MYC_TARGETS_DN                       | 4    | -1.526 | 0.036     | 594         |
| DANG_BOUND_BY_MYC                           | 368  | 2.248  | 0.000     | 1606        |
| DANG_MYC_TARGETS_UP                         | 95   | 2.252  | 0.000     | 1339        |
| DANG_MYC_TARGETS_DN                         | 8    | -0.810 | 0.763     | 497         |
| DANG_REGULATED_BY_MYC_UP                    | 42   | 2.029  | 0.000     | 1676        |
| DANG_REGULATED_BY_MYC_DN                    | 54   | 1.107  | 0.318     | 715         |
| FERNANDEZ_BOUND_BY_MYC                      | 57   | 1.921  | 0.000     | 1327        |
| HALLMARK_MYC_TARGETS_V1                     | 131  | 2.501  | 0.000     | 1126        |
| HALLMARK_MYC_TARGETS_V2                     | 50   | 2.198  | 0.000     | 1553        |
| MYC_UP.V1_UP                                | 91   | 2.193  | 0.000     | 1560        |
| MYC_UP.V1_DN                                | 46   | -2.124 | 0.000     | 1216        |
| SCHLOSSER_MYC_TARGETS_AND_SERUM_RESPONSE_DN | 34   | 2.172  | 0.000     | 1088        |
| SCHLOSSER_MYC_TARGETS_AND_SERUM_RESPONSE_UP | 29   | 1.942  | 0.000     | 1109        |
| SCHUHMACHER_MYC_TARGETS_UP                  | 61   | 2.112  | 0.000     | 1623        |
| SCHUHMACHER_MYC_TARGETS_DN                  | 3    | 0.613  | 0.949     | 1193        |

| BREAST CANCER GENE SETS                                |      |        |           |             |
|--------------------------------------------------------|------|--------|-----------|-------------|
| NAME                                                   | SIZE | NES    | FDR q-val | RANK AT MAX |
| POOLA_INVASIVE_BREAST_CANCER_UP                        | 82   | 1.482  | 0.041     | 2021        |
| POOLA_INVASIVE_BREAST_CANCER_DN                        | 40   | 0.629  | 0.968     | 1198        |
| SMID_BREAST_CANCER_BASAL_UP                            | 226  | 1.138  | 0.733     | 1241        |
| SMID_BREAST_CANCER_BASAL_DN                            | 158  | -1.083 | 0.307     | 738         |
| SMID_BREAST_CANCER_ERBB2_UP                            | 33   | 1.010  | 0.694     | 826         |
| SMID_BREAST_CANCER_LUMINAL_B_UP                        | 37   | 0.653  | 0.960     | 381         |
| SMID_BREAST_CANCER_LUMINAL_B_DN                        | 157  | -1.281 | 0.189     | 648         |
| SMID_BREAST_CANCER_NORMAL_LIKE_UP                      | 123  | -1.512 | 0.084     | 902         |
| SMID_BREAST_CANCER_LUMINAL_A_UP                        | 27   | -1.230 | 0.173     | 250         |
| TURASHVILI_BREAST_DUCTAL_CARCINOMA_VS_DUCTAL_NORMAL_DN | 70   | -2.007 | 0.000     | 694         |
| ZUCCHI_METASTASIS_UP                                   | 18   | 1.903  | 0.002     | 1214        |
| ZUCCHI_METASTASIS_DN                                   | 8    | 1.565  | 0.019     | 234         |
| VANTVEER_BREAST_CANCER_POOR_PROGNOSIS                  | 14   | 1.400  | 0.085     | 1970        |
